# Supplementary material for: Cation assisted binding and cleavage of dinitrogen by uranium complexes
Source: Royal Society of Chemistry journal article supplement (doi:10.1039/d2sc02530b), 2022-01-01
Supplement: d2sc02530b1.pdf [file d2sc02530b1.pdf]

ELECTRONIC SUPPORTING INFORMATION

## Cation assisted binding and cleavage of dinitrogen by uranium complexes

Nadir Jori<sup>a</sup>, Thayalan Rajeshkumar<sup>c</sup>, Rosario Scopelliti<sup>a</sup>, Ivica Živković<sup>b</sup>, Andrzej Sienkiewicz,<sup>d</sup> Laurent Maron<sup>c</sup> and Marinella Mazzanti<sup>\*a</sup>

<sup>a</sup>Institut des Sciences et Ingénierie Chimiques, Ecole Polytechnique Fédérale de Lausanne (EPFL), 1015 Lausanne, Switzerland. E-mail: [marinella.mazzanti@epfl.ch](mailto:marinella.mazzanti@epfl.ch)

<sup>b</sup>Laboratory for Quantum Magnetism, Institute of Physics, Ecole Polytechnique Fédérale de Lausanne (EPFL), 1015, Lausanne, Switzerland

<sup>c</sup>Laboratoire de Physique et Chimie des Nano-objets, Institut National des Sciences Appliquées, 31077 Toulouse, Cedex 4, France;

<sup>d</sup>Laboratory for Quantum Magnetism, Institute of Physics, École Polytechnique Fédérale de Lausanne (EPFL), 1015 Lausanne, Switzerland; and ADSresonances Sàrl; Route de Genève 60B, 1028 Préverenges, Switzerland

\*To whom correspondence should be addressed.

## Table of Contents

|                                      |            |
|--------------------------------------|------------|
| <b>Table of Contents</b> .....       | <b>2</b>   |
| <b>Experimental Procedures</b> ..... | <b>3</b>   |
| <b>NMR Spectra</b> .....             | <b>9</b>   |
| <b>X-ray crystallography</b> .....   | <b>34</b>  |
| <b>SQUID magnetometry</b> .....      | <b>40</b>  |
| <b>Electrochemistry</b> .....        | <b>44</b>  |
| <b>EPR data</b> .....                | <b>51</b>  |
| <b>Computational Details</b> .....   | <b>52</b>  |
| <b>Optimized Coordinates</b> .....   | <b>77</b>  |
| <b>References</b> .....              | <b>120</b> |

## Experimental Procedures

**General Considerations** Unless otherwise noted, all manipulations were carried out at ambient temperature under an inert argon atmosphere using Schlenk techniques and an MBraun glovebox equipped with a purifier unit. The water and oxygen levels were always kept at less than 0.1 ppm. Glassware was dried overnight at 140°C before use.

**NMR experiments** were carried out using NMR tubes adapted with J. Young valves. <sup>1</sup>H and <sup>13</sup>C NMR spectra were recorded on a Bruker 400 MHz or 600 Hz spectrometers. NMR chemical shifts are reported in ppm with solvent as internal reference. High-pressure experiments were performed in sapphire NMR tube (length 13 cm, internal diameter 0.80 cm), which was built in-house according to a literature protocol.<sup>1</sup>

**Elemental analyses** were performed using a Thermo Scientific Flash 2000 Organic Elemental Analyzer at the Institute of Chemistry and Chemical Engineering at EPFL.

**EPR.** EPR experiments were recorded with a Bruker Elexsys E500 spectrometer working at 9.4 GHz frequency with an Oxford ESR900 cryostat for 4-300K operations. The solution state spectra were recorded inside J-Young EPR tubes. The solid-state measurements were performed with solid samples inside J-Young EPR tubes

**Magnetic Measurements.** Magnetic measurements in solid state were performed using a QuantumDesign MPMS-5T superconducting quantum interference device (SQUID) magnetometer in a temperature range 2–250 K. The crushed crystalline sample was enclosed in an evacuated and flame-sealed quartz capsule and placed inside a plastic straw. Samples were restrained in an NVM immersion oil matrix to prevent sample torquing during measurements. Diamagnetic corrections were applied to the data using Pascal's constants.

The magnetic moment per uranium of complex **M<sub>2</sub>-2** and **Cs<sub>4</sub>-(N)<sub>2</sub>** was calculated at all temperatures using the formula:

$$\mu_{eff} = \sqrt{\frac{8\chi_{corr}T}{2}}$$

where  $\chi_{corr} = \chi_{meas} - \chi_d$ ,  $\chi_d$  was calculated using Pascal's constants.<sup>2</sup>

**Electrochemical Methods.** Cyclic voltammetry data were carried out at room temperature in an argon-filled glovebox described above. Data were collected using a Biologic SP-300 potentiostat connected to a personal computer. All samples were saturated in complex with 0.1 M [Bu<sub>4</sub>N][BPh<sub>4</sub>] supporting electrolyte in THF solution. The experiments were carried out with a platinum disk (d = 5 mm) working electrode, a platinum wire counter electrode, and an Ag/AgCl reference electrode. The experiments were repeated on independently synthesized samples to assess the reproducibility of the measurement. Potential calibration was performed at the end of each data collection cycle using the ferrocene/ferrocenium [(C<sub>5</sub>H<sub>5</sub>)<sub>2</sub>Fe]<sup>+0</sup> couple as an internal standard.

**Starting materials** Unless otherwise noted, reagents were purchased from commercial suppliers and used without further purification. Tris(*tert*-butoxy)silanol was purified by sublimation. The solvents were purchased from Aldrich or Cortecnet (deuterated solvents) in their anhydrous form, conditioned under argon and vacuum distilled from K/benzophenone (toluene, hexane, THF, *d*<sub>8</sub>-THF, *d*<sub>8</sub>-toluene).

*d*<sub>6</sub>-DMSO was freeze-degassed and dried over 3 Å molecular sieves for several days. <sup>13</sup>CO (93.13% <sup>13</sup>C) was purchased from Cortecnet and transferred to a flask equipped with a J-Young valve containing activated 3 Å molecular sieves prior to use. Precise amounts of labelled gases are added to reaction flasks or NMR tubes equipped with a J-Young valve using a short connector of known volume adapted on a Schlenk line equipped with a pressure sensor. Depleted uranium was purchased from Ibilabs, Florida, USA. [{U<sup>IV</sup>(OSi(O<sup>t</sup>Bu)<sub>3</sub>)<sub>3</sub>]<sub>2</sub>(μ-O)] (**1**)<sup>3</sup>, [K<sub>2</sub>{U<sup>III</sup>(OSi(O<sup>t</sup>Bu)<sub>3</sub>)<sub>3</sub>]<sub>2</sub>(μ-O)] (**K<sub>2</sub>-2**)<sup>3</sup> and [K<sub>2</sub>{U<sup>V</sup>(OSi(O<sup>t</sup>Bu)<sub>3</sub>)<sub>3</sub>]<sub>2</sub>(μ-O)(μ-N<sub>2</sub>)] (**K<sub>2</sub>-N<sub>2</sub>**)<sup>3</sup>, CsC<sub>8</sub>,<sup>4</sup> RbC<sub>8</sub>,<sup>4</sup> were prepared according to the published procedures.

Caution: Depleted uranium (primary isotope <sup>238</sup>U) is a weak α-emitter (4.197 MeV) with a half-life of 4.47×10<sup>9</sup> years. Manipulations and reactions should be carried out in monitored fume hoods or in an inert atmosphere glovebox in a radiation laboratory equipped with α- and β-counting equipment.

## Syntheses

**Synthesis [Cs<sub>2</sub>{U<sup>III</sup>(OSi(O<sup>t</sup>Bu)<sub>3</sub>)<sub>3</sub>]<sub>2</sub>(μ-O)], Cs<sub>2</sub>-2.** A cold (-80°C) teal solution of **1** (89.5 mg, 0.0479 mmol, 1 equiv.) in THF (6.0 mL) was added to a bronze cold (-80°C) suspension of CsC<sub>8</sub> (54.8 mg, 0.239 mmol, 5 equiv.) in THF (0.4 mL).

The reaction mixture was stirred at  $-80^{\circ}\text{C}$  for 30 min. The resultant suspension was filtered through cold ( $-80^{\circ}\text{C}$ ) glassware to remove the excess reducing agent and graphite, obtaining a dark red solution. Volatiles were removed under vacuum and the resultant dark red solid was dissolved in cold ( $-40^{\circ}\text{C}$ ) toluene (1.0 mL). The resultant solution was left standing at  $-40^{\circ}\text{C}$  for 3 days affording dark red crystals of **Cs<sub>2</sub>-2** (79.2 mg, 70% yield). Anal. Calcd for  $[\text{Cs}_2\{\text{U}^{\text{III}}(\text{OSi}(\text{O}^t\text{Bu})_3)_2(\mu\text{-O})\}(\text{Toluene})_1]$   $\text{Cs}_2\text{C}_{79}\text{H}_{170}\text{O}_{25}\text{U}_2\text{Si}_6$ : C: 39.04%; H: 7.05 %; N: 0.00%. Found: C: 38.77%; H: 7.19%; N: 0.00%.

$^1\text{H}$  NMR (400 MHz,  $d_8$ -THF, 233 K):  $\delta = -0.58$  ppm (br,  $\text{CH}_3$  terminal siloxide) (Figure S1)

$^1\text{H}$  NMR (400 MHz,  $d_8$ -THF, 298 K):  $\delta = 0.18$  ppm (s,  $\text{CH}_3$  terminal siloxide) (Figure S2)

$^1\text{H}$  NMR (400 MHz,  $d_8$ -toluene, 233 K):  $\delta = -0.08$  ppm (s,  $\text{CH}_3$  terminal siloxide) (Figure S3)

$^1\text{H}$  NMR (400 MHz,  $d_8$ -toluene, 298 K):  $\delta = 0.38$  ppm (s,  $\text{CH}_3$  terminal siloxide) (Figure S4)

**Cs<sub>2</sub>-2** is stable at  $25^{\circ}\text{C}$  in a toluene solution over the course of 17 days (Figure S5) and is still the major species in a THF solution at  $25^{\circ}\text{C}$  over the course of 24 hs (80% of starting material is still present in solution), but decomposes completely over the course of 6 days (Figure S6). Complex **Cs<sub>2</sub>-2** is stable in a THF solution at  $-40^{\circ}\text{C}$  for the course of 21 days, showing only small signs of decomposition (84% of complex still remains) (Figure S7). The same reduction performed at  $-40^{\circ}\text{C}$  yielded **Cs<sub>2</sub>-2** in lower yields.

**Synthesis  $[\text{Rb}_2\{\text{U}^{\text{III}}(\text{OSi}(\text{O}^t\text{Bu})_3)_2(\mu\text{-O})\}]$ , **Rb<sub>2</sub>-2**.** A cold ( $-80^{\circ}\text{C}$ ) teal solution of **1** (113.5 mg, 0.0548 mmol, 1 equiv.) in THF (7.5 mL) was added to a bronze cold ( $-80^{\circ}\text{C}$ ) suspension of  $\text{RbC}_8$  (49.7 mg, 0.274 mmol, 5 equiv.) in THF (0.5 mL). The reaction mixture was stirred at  $-80^{\circ}\text{C}$  for 30 min. The resultant suspension was filtered through cold ( $-80^{\circ}\text{C}$ ) glassware to remove the excess reducing agent and graphite. Volatiles were removed under vacuum and the resultant dark red solid was dissolved in cold ( $-40^{\circ}\text{C}$ ) toluene (1.0 mL). The resultant solution was left standing at  $-40^{\circ}\text{C}$  for 2 days affording dark red crystals of **Rb<sub>2</sub>-2** in 60% yield (73.8 mg). Anal. Calcd for  $[\text{Rb}_2\{\text{U}^{\text{III}}(\text{OSi}(\text{O}^t\text{Bu})_3)_2(\mu\text{-O})\}]$   $\text{Rb}_2\text{C}_{72}\text{H}_{162}\text{O}_{25}\text{U}_2\text{Si}_6$ : C: 38.55%; H: 7.28 %; N: 0.00%. Found: C: 38.68%; H: 7.16%; N: 0.00%.

The use of less equivalents of  $\text{RbC}_8$  leads to incomplete reduction and concomitant formation of  $[\text{Rb}\{\text{U}^{\text{III}}(\text{OSi}(\text{O}^t\text{Bu})_3)_3\}(\mu\text{-O})\{\text{U}^{\text{IV}}(\text{OSi}(\text{O}^t\text{Bu})_3)_3\}]$  (Figure S62)

$^1\text{H}$  NMR (400 MHz,  $d_8$ -toluene, 233 K):  $\delta = -0.27$  ppm (s,  $\text{CH}_3$  terminal siloxide) (Figure S8)

$^1\text{H}$  NMR (400 MHz,  $d_8$ -toluene, 298 K):  $\delta = 0.29$  ppm (s,  $\text{CH}_3$  terminal siloxide) (Figure S9)

$^1\text{H}$  NMR (400 MHz,  $d_8$ -THF, 233 K):  $\delta = -0.87$  ppm (s,  $\text{CH}_3$  terminal siloxide) (Figure S10)

$^1\text{H}$  NMR (400 MHz,  $d_8$ -THF, 298 K):  $\delta = 0.06$  ppm (s,  $\text{CH}_3$  terminal siloxide) (Figure S11)

**Rb<sub>2</sub>-2** is still the major species in a THF solution at  $25^{\circ}\text{C}$  after 24 hs (60% of starting material is still present in solution) but decomposes completely over the course of 6 days (Figure S12). **Rb<sub>2</sub>-2** is still the major species (62% of starting material is still present in solution) in a THF solution at  $-40^{\circ}\text{C}$  after 14 days (Figure S13). **Rb<sub>2</sub>-2** is still the major species in a toluene solution after 24 hs (70% of starting material is still present in solution) but decomposes completely over the course of 5 days into  $[\text{Rb}_2\{\text{U}^{\text{IV}}(\text{OSi}(\text{O}^t\text{Bu})_3)_2(\mu\text{-O})_2\}]$ , complex **Rb<sub>2</sub>-4** ( $-1.57$  ppm) and other unidentified species. (Figure S14) A few yellow-green crystals of  $[\text{Rb}_2\{\text{U}^{\text{IV}}(\text{OSi}(\text{O}^t\text{Bu})_3)_2(\mu\text{-O})_2\}]$ , **Rb<sub>2</sub>-4** (Figure S59) were grown from a saturated toluene solution over the course of 2 days at  $-40^{\circ}\text{C}$ .

Comparison of the  $^1\text{H}$  NMR spectra in toluene solution of **M<sub>2</sub>-2** at  $-40^{\circ}\text{C}$  (Figure S15) shows a single sharp resonance for all of them, showing that these complexes show the same fluxional behaviour in solution even at low temperatures.

**Synthesis  $[\text{Na}\{\text{U}^{\text{III}}(\text{OSi}(\text{O}^t\text{Bu})_3)_3\}(\mu\text{-O})\{\text{U}^{\text{IV}}(\text{OSi}(\text{O}^t\text{Bu})_3)_3\}]$ , **Na-3**.** A cold ( $-40^{\circ}\text{C}$ ) teal solution of **1** (34.9 mg, 0.0168 mmol, 1 equiv.) in THF (2.0 mL) was added to cold  $\text{Na}^0$  mirror. The reaction was kept at  $-40^{\circ}\text{C}$  for 15 hs. The resultant red-orange solution was filtered through cold glassware ( $-80^{\circ}\text{C}$ ) yielding a red-orange solution which was evaporated at  $-80^{\circ}\text{C}$  (0.4 mL). The  $^1\text{H}$  NMR spectrum of the reaction mixture at  $-40^{\circ}\text{C}$  (Figure S16) shows the presence of 4 broad resonances at  $\delta = 14.58$  ppm, 9.99 ppm, 0.41 ppm and  $-3.78$  ppm. The solution was left standing at  $-40^{\circ}\text{C}$  for 2 days affording dark red crystals of **Na-3** (Figure S58) (11.3 mg, 0.0054 mmol, 30% yield). Anal. Calcd for  $[\text{Na}\{\text{U}^{\text{III}}(\text{OSi}(\text{O}^t\text{Bu})_3)_3\}(\mu\text{-O})\{\text{U}^{\text{IV}}(\text{OSi}(\text{O}^t\text{Bu})_3)_3\}]$   $\text{NaC}_{72}\text{H}_{162}\text{O}_{25}\text{U}_2$ : C: 41.27%; H: 7.79 %; N: 0.00%. Found: C: 40.91%; H: 7.74%; N: 0.00%.

**Synthesis  $[\text{Rb}_2\{\text{U}^{\text{V}}(\text{OSi}(\text{O}^t\text{Bu})_3)_2(\mu\text{-O})(\mu\text{-N}_2)\}]$ , **Rb<sub>2</sub>-N<sub>2</sub>**.** A cold ( $-40^{\circ}\text{C}$ ) dark red solution of **Rb<sub>2</sub>-2** in toluene (1.5 ml) prepared by reduction of **1** (128.5 mg, 0.0620 mmol, 1 equiv.) in an Ar glovebox was transferred in a reaction tube and connected to a Schlenk line. The solution was degassed by two cycles of freeze-pump-thawing and  $\text{N}_2$  (1 atm) was added to the reaction mixture which changed colour to dark brown over the course of 5 minutes.

The solution was left standing at  $-40^{\circ}\text{C}$  under a  $\text{N}_2$  atmosphere for 2 days yielding dark brown crystals suitable for X-ray diffraction of the complex  $[\text{Rb}_2\{\text{U}(\text{OSi}(\text{O}^t\text{Bu})_3)_2(\mu\text{-O})(\mu\text{-N}_2)\}]$ , **Rb<sub>2</sub>-N<sub>2</sub>** in 53% yield (75.0 mg, 0.0330 mmol). Due to the reversible binding of  $\text{N}_2$  of the complex (Figures S19 and S20), **Rb<sub>2</sub>-N<sub>2</sub>** has to be recovered under a gentle  $\text{N}_2$  flux.



The conversion of **Rb<sub>2</sub>-2** into **Rb<sub>2</sub>-N<sub>2</sub>** is higher (82%), as determined by <sup>1</sup>H NMR studies, using trimethylsilyl ether as internal standard.

Anal. Calcd for [Rb<sub>2</sub>{U(OSi(O<sup>t</sup>Bu)<sub>3</sub>)<sub>3</sub>}<sub>2</sub>(μ-O)(μ-N<sub>2</sub>)] C<sub>72</sub>H<sub>162</sub>N<sub>2</sub>O<sub>25</sub>U<sub>2</sub>Rb<sub>2</sub>Si<sub>6</sub>: C: 38.07%; H: 7.19 %; N: 1.23%. Found: C: 37.84%; H: 6.82%; N: 0.92%.

<sup>1</sup>H NMR (400 MHz, d<sub>8</sub>-toluene, 233 K): δ = -3.54 ppm (s, br, CH<sub>3</sub> terminal siloxide) (Figure S17)

Comparison of the <sup>1</sup>H NMR spectrum in toluene solution at -40°C (Figure S44) shows that **Rb<sub>2</sub>-N<sub>2</sub>** shows the same fluxional behaviour in solution as **K<sub>2</sub>-N<sub>2</sub>** even at low temperatures.

<sup>1</sup>H NMR (400 MHz, d<sub>8</sub>-toluene, 298 K): δ = -2.27 ppm (s, CH<sub>3</sub> terminal siloxide) (Figure S18)

Drying the solid under vacuum for 1 h at -80°C leads to the complete loss of the bound N<sub>2</sub> and the reformation of **Rb<sub>2</sub>-2** (Figure S19). In toluene solution at -40°C, the same process occurs over the course of 14 days after removing the headspace (Figure S20). The loss of N<sub>2</sub> under vacuum renders further characterization of the complex very difficult.

Low-temperature (6-30 K) X-band EPR measurements carried out in isolated complex **Rb<sub>2</sub>-N<sub>2</sub>** revealed the presence of two signals in a 10.2 mM frozen solution at g=3.37 and g=1.15.

**Reaction of in situ prepared complex Rb<sub>2</sub>-2 with H<sub>2</sub>.** A cold (-80°C) teal solution of complex **1** (10.4 mg, 0.00502 mmol, 1 equiv.) in THF (0.5 mL) was added to a cold (-80°C) bronze suspension of RbC<sub>8</sub> (4.4 mg, 0.0240 mmol, 5 equiv.) in THF (0.1 mL). The suspension was stirred at -80 °C for 30 min. The reaction mixture was then filtered on cold (-80°C) glassware. All the volatiles were removed under vacuum at -80 °C and cold d<sub>8</sub>-toluene (0.4 mL) added to afford a dark red solution of **Rb<sub>2</sub>-2**. The <sup>1</sup>H NMR spectrum of the solution at 25°C confirmed the presence of **Rb<sub>2</sub>-2** as a pure species, together with traces of THF and the complex was reacted without further purification. The reaction tube was transferred to a Schlenk line and degassed by 3 freeze-pump-thaw cycles. Hydrogen gas (1 atm) was added into the tube and the reaction mixture was left stirring at room temperature. The reaction mixture turned from dark red to light orange within 30 min. The <sup>1</sup>H NMR spectrum at 25°C after 24 hs shows the presence one main resonance at δ= -1.71 ppm, the signals of remaining THF together with other smaller resonances. (Figure S21, top)

**Reaction of in situ prepared complex Rb<sub>2</sub>-N<sub>2</sub> with H<sub>2</sub>.** A cold (-80°C) teal solution of complex **1** (10.3 mg, 0.00497 mmol, 1 equiv.) in THF (0.5 mL) was added to a cold (-80°C) bronze suspension of RbC<sub>8</sub> (4.5 mg, 0.0248 mmol, 5 equiv.) in THF (0.1 mL). The suspension was stirred at -80 °C for 30 min. The reaction mixture was then filtered on cold (-80°C) glassware. All the volatiles were removed under vacuum at -80 °C and cold toluene (0.4 mL) added to afford a dark red solution of **Rb<sub>2</sub>-2**. The reaction tube was transferred to a Schlenk line and degassed by 3 freeze-pump-thaw cycles. N<sub>2</sub> (1 atm) was added into the tube and the reaction mixture was left stirring at room temperature for 5 min. The <sup>1</sup>H NMR spectrum of the solution in d<sub>8</sub>-tol (0.4 mL) confirmed the presence of **Rb<sub>2</sub>-N<sub>2</sub>** as a pure species, together with traces of THF and the complex was reacted without further purification. The reaction tube was transferred to a Schlenk line and Hydrogen gas (1 atm) was added on the frozen solution and the reaction mixture was left stirring at room temperature. The reaction mixture turned from dark red to light orange within 30 min. The <sup>1</sup>H NMR spectrum at 25°C after 24 hs shows the presence one main resonance at δ= -1.71 ppm, the signals of remaining THF together with other smaller resonances. (Figure S21, bottom)

**Synthesis [Cs<sub>3</sub>{U<sup>V</sup>(OSi(O<sup>t</sup>Bu)<sub>3</sub>)<sub>3</sub>}<sub>2</sub>(μ-N)<sub>2</sub>{U<sup>V</sup>(OSi(O<sup>t</sup>Bu)<sub>3</sub>)<sub>2</sub>(κ-O)}][CsOSi(O<sup>t</sup>Bu)<sub>3</sub>], Cs<sub>4</sub>-(N)<sub>2</sub>.** A cold (-40°C) bronze suspension of CsC<sub>8</sub> (23.5 mg, 0.103 mmol, 2 equiv.) in toluene (1.5 mL) was added to a cold (-40°C) stirring dark red solution of **Cs<sub>2</sub>-2** (120.0 mg, 0.0513 mmol, 1 equiv.) in toluene (2.0 mL) under a N<sub>2</sub> atmosphere. The reaction mixture was left to react under stirring for 15 hs at -40°C. Afterwards it was filtered, yielding a dark yellow solution. The <sup>1</sup>H NMR spectrum at 25°C (Figure S22) and at -40°C (Figure S23) of the solution shows the presence of the signals of **Cs<sub>4</sub>-(N)<sub>2</sub>**, and CsOSi(O<sup>t</sup>Bu)<sub>3</sub>. The solution was concentrated until 0.4 mL and left standing at -40°C for 2 days, affording golden crystals of complex **Cs<sub>4</sub>-(N)<sub>2</sub>** (50.0% yield, 67.3 mg, 0.0253 mmol).

Anal. Calcd for [Cs<sub>3</sub>{U<sup>V</sup>(OSi(O<sup>t</sup>Bu)<sub>3</sub>)<sub>3</sub>}<sub>2</sub>(μ-N)<sub>2</sub>{U<sup>V</sup>(OSi(O<sup>t</sup>Bu)<sub>3</sub>)<sub>2</sub>(κ-O)}][CsOSi(O<sup>t</sup>Bu)<sub>3</sub>]•(Toluene)<sub>1.2</sub> Cs<sub>4</sub>C<sub>80.4</sub>H<sub>71.62</sub>O<sub>25</sub>N<sub>2</sub>U<sub>2</sub>: C: 35.21%; H: 6.31 %; N: 1.02%. Found: C: 35.48%; H: 6.35%; N: 1.04%.

<sup>1</sup>H NMR (400 MHz, d<sub>8</sub>-toluene, 298 K): δ = 17.08 ppm (br), 9.90 ppm (s), -3.97 ppm (s), -10.21 ppm (br) (Figure S24)

<sup>1</sup>H NMR (400 MHz, d<sub>8</sub>-tol, 233 K): δ = 13.22 ppm (s), -4.58 ppm (br), -14.11 ppm (br) (Figure S25)

The stability of complex **Cs<sub>4</sub>-(N)<sub>2</sub>** at -40 °C and at 25°C was investigated by <sup>1</sup>H NMR spectroscopy. Complex **Cs<sub>4</sub>-(N)<sub>2</sub>** converts cleanly into another species with resonances at δ= 10.69 ppm (s). and -11.54 (s, br) in 12 hs at 25°C (Figure S26).

Complex **Cs<sub>4</sub>-(N)<sub>2</sub>** converts very slowly (75% still present after 2 weeks) at -40° C (Figure S27). This compares well with the analogous species reported recently <sup>5</sup>

**Reduction of Cs<sub>2</sub>-2 with 2 equiv. of CsC<sub>8</sub> under Ar atmosphere.** A cold (-40°C) bronze suspension of CsC<sub>8</sub> (2.1 mg, 0.0092 mmol, 2 equiv.) in d<sub>8</sub>-tol (0.5 mL) was added to a cold (-40°C) stirring dark red solution of **Cs<sub>2</sub>-2** (10.1 mg, 0.00432 mmol, 1 equiv.) in d<sub>8</sub>-tol (0.5 mL) under an Ar atmosphere. The reaction mixture was stirred for 24 hs at -40°C. Afterwards it was filtered, yielding a red solution. The <sup>1</sup>H NMR spectrum at 25°C of the solution shows the presence of the signals of **Cs<sub>2</sub>-2** (Figure S28).

**Addition of HCl to the reaction mixture obtained after reacting complex Cs<sub>2</sub>-2 with 2 equiv. of CsC<sub>8</sub> at -40°C under a N<sub>2</sub> atmosphere.** A cold (-40°C) bronze suspension of CsC<sub>8</sub> (3.0 mg, 0.0131 mmol, 2 equiv.) in d<sub>8</sub>-tol (0.4 mL) was added to a cold (-40°C) stirring dark red solution of **Cs<sub>2</sub>-2** (14.2 mg, 0.00607 mmol, 1 equiv.) in d<sub>8</sub>-tol (0.5 mL) under a N<sub>2</sub> atmosphere. The reaction mixture stirred for 24 hs at -40°C. Afterwards it was filtered, yielding a dark yellow-brown solution. Volatiles were removed under vacuum and 1.0 mL of a cold (-80°C) 2 M HCl solution in Et<sub>2</sub>O was added, yielding a yellow solution and a white precipitate. After 1 hour, volatiles were removed under vacuum. The resulting solid was dissolved in d<sub>6</sub>-DMSO and dimethylsulfone was added as an internal standard for the quantitative NH<sub>4</sub>Cl detection. NH<sub>4</sub>Cl is formed in 83% yield (1.66 equiv., 100% conversion corresponding to 2 equiv. of NH<sub>4</sub>Cl) (Figure S29)

**Reaction of complex Cs<sub>4</sub>-(N)<sub>2</sub> with excess HCl.** 1 mL of a cold (-80°C) 2 M solution of HCl in Et<sub>2</sub>O was added to solid complex **Cs<sub>4</sub>-(N)<sub>2</sub>** (7.0 mg, 0.0026 mmol, 1 equiv.). The solution immediately turned yellow and a white precipitate formed. After 1 hour, volatiles were removed under vacuum. The resulting solid was dissolved in d<sub>6</sub>-DMSO and dimethylsulfone was added as an internal standard for the quantitative NH<sub>4</sub>Cl detection. NH<sub>4</sub>Cl is formed in 100% yield (2 equiv. of NH<sub>4</sub>Cl). (Figure S30)

**Dissolution of complex Cs<sub>4</sub>-(N)<sub>2</sub> in THF at -40°C.** A yellow-brown solution of **Cs<sub>4</sub>-(N)<sub>2</sub>** (7.2 mg, 0.0027 mmol, 1 equiv.) in cold (-40°C) was prepared and analyzed by <sup>1</sup>H NMR spectroscopy at -40°C (Figure S31, bottom). All volatiles were removed under vacuum at -80°C and the solid was further dried for 2 hs to complete removal of the toluene. Afterwards it was dissolved in cold (-40°C) d<sub>8</sub>-THF (0.4 mL), yielding a yellow solution. The <sup>1</sup>H NMR of the solution shows two resonances at δ= 13.85 ppm and -0.25 ppm, assigned to complex **Cs<sub>4</sub>-(N)<sub>2</sub>**, together with a resonance at δ= 1.33 ppm assigned to CsO(Si(O<sup>t</sup>Bu)<sub>3</sub>) salt (Figure S32). All volatiles were removed under vacuum at -80°C and the solid was further dried for 2 hs at -80°C. The mixture was dissolved in d<sub>8</sub>-tol (0.5 mL) and analyzed by <sup>1</sup>H NMR spectroscopy at -40°C and 25°C. The <sup>1</sup>H NMR spectrum at -40°C (Figure S32, top) shows the presence of **Cs<sub>4</sub>-(N)<sub>2</sub>**, but with an increase in the formation of CsO(Si(O<sup>t</sup>Bu)<sub>3</sub>). The <sup>1</sup>H NMR spectrum in toluene solution at 25°C (Figure S33) after THF shows the signals assigned to complex **Cs<sub>4</sub>-(N)<sub>2</sub>** in the same ratio which was observed for the crystals immediately dissolved in toluene, together with the presence of other unknown signals and CsO(Si(O<sup>t</sup>Bu)<sub>3</sub>).

**Reaction of complex Rb<sub>2</sub>-N<sub>2</sub> with 2 equiv. of RbC<sub>8</sub>.** A cold (-40°C) bronze suspension of RbC<sub>8</sub> (4.3 mg, 0.0237 mmol, 2 equiv.) in toluene (0.4 mL) was added to a cold (-40°C) stirring dark brown solution of **Rb<sub>2</sub>-N<sub>2</sub>** (25.5 mg, 0.0112 mmol, 1 equiv.) in toluene (0.5 mL) under a N<sub>2</sub> atmosphere. The reaction mixture was left to react under stirring for 24 hs at -40°C. Afterwards it was filtered, yielding a dark yellow solution. The <sup>1</sup>H NMR spectrum at 25°C of the solution shows four main resonances at δ= 10.37 ppm, 1.45 ppm (RbOSi(O<sup>t</sup>Bu)<sub>3</sub>), -1.57 ppm ([Rb<sub>2</sub>{U<sup>IV</sup>(OSi(O<sup>t</sup>Bu)<sub>3</sub>)<sub>3</sub>]<sub>2</sub>(μ-O)<sub>2</sub>]) and -4.31 ppm. (Figure S34). A similar set of signals at δ= 11.08 ppm and -4.06 ppm in a 1:2 ratio was also observed for the previously reported **K<sub>4</sub>-(N)<sub>2</sub>**.

Comparison of the reduction of **K<sub>2</sub>-N<sub>2</sub>**, **Rb<sub>2</sub>-N<sub>2</sub>** and **Cs<sub>2</sub>-2** with 2 equiv. of MC<sub>8</sub> (M = K, Rb and Cs, respectively) at 233 K under a N<sub>2</sub> atmosphere for 24 hs (Figure S35) shows that the formation of the bis-nitride species is cleaner for K and Rb, with the latter having some bis-oxo species as impurity from side reactions.

**Reaction of complex Rb<sub>2</sub>-2 with 2 equiv. of RbC<sub>8</sub> under N<sub>2</sub>.** A cold (-40°C) bronze suspension of RbC<sub>8</sub> (3.8 mg, 0.021 mmol, 2 equiv.) in toluene (0.6 mL) was added to a cold (-40°C) stirring dark red solution of **Rb<sub>2</sub>-2** (22.0 mg, 0.00981 mmol, 1 equiv.) in toluene (1.2 mL) under a N<sub>2</sub> atmosphere. The reaction mixture was left to react under stirring for 24 hs at -40°C. Afterwards it was filtered, yielding a dark yellow-brown solution. The <sup>1</sup>H NMR spectrum at -40°C (Figure S36) of the solution shows two sharp resonances δ= 14.06 ppm, 1.45 ppm (RbOSi(O<sup>t</sup>Bu)<sub>3</sub>) and three broad resonances at δ= 23.56 ppm, -6.42 ppm, and -15.32 ppm. The <sup>1</sup>H NMR spectrum at 25°C (Figure S37) of the solution shows two main sharp resonances δ= 10.47 ppm, -4.38 ppm and two broad resonances at δ= 17.08 ppm and -10.51 ppm. Comparison with the <sup>1</sup>H NMR spectrum for the putative bis-nitride obtained for the 2-electron reduction of **K<sub>2</sub>-N<sub>2</sub>** and

the reduction of the analogue **Cs<sub>2</sub>-2** suggest that in this case a similar species is obtained upon reduction under N<sub>2</sub> in similar conditions (Figure S38-39).

**Addition of HCl to the reaction mixture obtained after reacting complex Rb<sub>2</sub>-2 with 2 equiv. of RbC<sub>8</sub> at -40°C under a N<sub>2</sub> atmosphere.** A cold (-40°C) bronze suspension of RbC<sub>8</sub> (3.2 mg, 0.018 mmol, 2 equiv.) in toluene (0.5 mL) was added to a cold (-40°C) stirring dark red solution of Rb<sub>2</sub>-2 (19.8 mg, 0.00869 mmol, 1 equiv.) in toluene (0.5 mL) under an Ar atmosphere. The reaction mixture stirred for 24 hs at -40°C. Volatiles were removed under vacuum and 1.0 mL of a cold (-80°C) 2 M HCl solution in Et<sub>2</sub>O was added, yielding a yellow solution and a white precipitate. After 1 hour, volatiles were removed under vacuum. The resulting solid was dissolved in *d*<sub>6</sub>-DMSO and dimethylsulfone was added as an internal standard for the quantitative NH<sub>4</sub>Cl detection. NH<sub>4</sub>Cl is formed in 85% yield (1.7 equiv., 100% conversion corresponding to 2 equiv. of NH<sub>4</sub>Cl) (Figure S40)

**Reaction of complex Cs<sub>2</sub>-2 with higher pressure of N<sub>2</sub> at 25°C.** A dark red solution of complex **Cs<sub>2</sub>-2** (17.0 mg, 0.0073 mmol, 1 equiv.) in *d*<sub>8</sub>-toluene (2.5 mL) was transferred into sapphire NMR tube inside the glovebox. Once the tube had been sealed by means of the titanium alloy valve, it was removed from the glovebox, transported inside a safety shield, and pressurized with 99.9999% N<sub>2</sub> (Carbagas) with increasing pressures (1-100 bar) at 25°C. The <sup>1</sup>H NMR spectra of the reaction mixture showed that no reaction occurs (Figure S41).

**Reaction of complex Cs<sub>2</sub>-2 with higher pressure of N<sub>2</sub> at -40°C.** A dark red solution of complex **Cs<sub>2</sub>-2** (14.3 mg, 0.00612 mmol, 1 equiv.) in *d*<sub>8</sub>-toluene (2.5 mL) was transferred into sapphire NMR tube inside the glovebox. Once the tube had been sealed by means of the titanium alloy valve, it was removed from the glovebox, transported inside a safety shield, and pressurized with 99.9999% N<sub>2</sub> (Carbagas) with increasing pressures (1-100 bar) at -40°C. The <sup>1</sup>H NMR spectra at -40°C of the reaction mixture showed the partial to total consumption of the starting material and the formation of a new broad resonance at δ = -3.97 ppm (Figure S42).

**Reaction of complex Cs<sub>2</sub>-2 with 50 bar of N<sub>2</sub> at -40°C removal of headspace.** A dark red solution of complex **Cs<sub>2</sub>-2** (15.4 mg, 0.00659 mmol, 1 equiv.) in *d*<sub>8</sub>-toluene (2.5 mL) was transferred into sapphire NMR tube inside the glovebox. Once the tube had been sealed by means of the titanium alloy valve, it was removed from the glovebox, transported inside a safety shield, and pressurized with 99.9999% N<sub>2</sub> (Carbagas) with 50 bar at -40°C. The <sup>1</sup>H NMR spectra at -40°C of the reaction mixture showed the partial consumption of the starting material and the formation of a new broad resonance at δ = -3.97 ppm. Afterwards, the excess pressure was removed at -40°C and the evolution of its <sup>1</sup>H NMR spectrum at -40°C was followed. Over the course of 16 hs, most of the starting material is reformed (70%). (Figure S43).

Comparison of the <sup>1</sup>H NMR spectrum of the toluene solution of **Cs<sub>2</sub>-2** after addition of 100 bar of N<sub>2</sub> at -40°C with the spectra of **K<sub>2</sub>-N<sub>2</sub>** and **Rb<sub>2</sub>-N<sub>2</sub>** shows that they all exhibit the same fluxional behaviour in solution at -40°C (Figure S44)

**Reaction of complex Cs<sub>4</sub>-(N)<sub>2</sub> with 5 equiv. of <sup>13</sup>CO.** A yellow-brown solution of complex **Cs<sub>4</sub>-(N)<sub>2</sub>** (8.5 mg, 0.0032 mmol, 1 equiv.) in *d*<sub>8</sub>-toluene (0.6 mL) was transferred in a J-Young adapted NMR tube and connected to a Schlenk line. The solution was degassed by three cycles of freeze-pump-thawing and <sup>13</sup>CO (0.016 mmol, 5 equiv.) was added to the reaction mixture at -40°C which changed colour to pale yellow over the course of 5 minutes. The <sup>1</sup>H NMR spectrum of the reaction mixture at -40°C immediately after (Figure S45, top) shows the disappearance of the starting material and the presence of three broad resonances at δ = 30.21 ppm, -3.30 ppm and -14.69 ppm, together with CsO(Si(O<sup>t</sup>Bu)<sub>3</sub>). The <sup>13</sup>C NMR spectrum of the reaction mixture at -40°C (Figure S46) showed one resonance attributable to U-bound <sup>13</sup>C species, at δ = -1.40 ppm, the presence of <sup>13</sup>CO (184.5 ppm) and two signals at δ = 70.30 ppm and 32.37 ppm assigned to the siloxide ligands. The reaction was left under stirring at -40°C for 24 hs, after which white powder came down. The <sup>1</sup>H NMR spectrum of the reaction mixture at -40°C after 24 hs (Figure S47, top) shows the presence of the same three broad signals but the disappearance of CsO(Si(O<sup>t</sup>Bu)<sub>3</sub>). The <sup>1</sup>H NMR spectrum of the reaction mixture at 25°C after 24 hs (Figure S48) shows the one resonance at δ = -1.40 ppm, assigned to [Cs<sub>2</sub>{U<sup>IV</sup>(OSi(O<sup>t</sup>Bu)<sub>3</sub>)<sub>3</sub>]<sub>2</sub>(μ-O)<sub>2</sub>] (91% conversion), similarly to what has been reported recently by its K analogue.<sup>5</sup> Volatiles were removed under vacuum and 0.5 mL of D<sub>2</sub>O (pD=13) were added to the resultant light-yellow solid together with few drops of *d*<sub>6</sub>-DMSO as a reference. Quantitative <sup>13</sup>C NMR spectroscopy revealed the formation of N<sup>13</sup>CO<sup>-</sup> and <sup>13</sup>CN<sup>-</sup> in a 1:1 ratio (Figure S49) and in 100% yield (measured using <sup>13</sup>C-labelled sodium acetate as internal standard). A few yellow-green crystals of [Cs<sub>2</sub>{U<sup>IV</sup>(OSi(O<sup>t</sup>Bu)<sub>3</sub>)<sub>3</sub>]<sub>2</sub>(μ-O)<sub>2</sub>, complex **Cs<sub>2</sub>-4** (Figure S60) were grown from a saturated toluene solution (0.2 mL) over the course of 2 days at -40°C after addition of <sup>13</sup>CO and filtering the white powder.

**Reduction of [U(OSi(O<sup>t</sup>Bu)<sub>3</sub>)<sub>3</sub>]<sub>2</sub>(μ-O), complex 1 under N<sub>2</sub> with 4 equiv. of CsC<sub>8</sub> in toluene at -40°C.** A cold (-40°C) bronze suspension of CsC<sub>8</sub> (7.0 mg, 0.031 mmol, 4 eq) in toluene (0.5 mL) was added to a cold solution (-40°C) of

complex **1** (15.6 mg, 0.00753 mmol, 1 eq) in toluene (1.0 mL) under N<sub>2</sub> atmosphere. The mixture was allowed to react at -40°C for 24 hs and its <sup>1</sup>H NMR spectrum was followed over time. The <sup>1</sup>H NMR spectrum of the reaction mixture shows the presence of the signals of CsOSi(O<sup>t</sup>Bu)<sub>3</sub> and complex **Cs<sub>4</sub>-(N)<sub>2</sub>** together with unknown species with a chemical shift of -0.77 ppm (Figure S50 and S51).

**Reduction of Cs<sub>2</sub>-2 with 2 equiv. of CsC<sub>8</sub> under N<sub>2</sub> atmosphere in THF.** A cold (-40°C) bronze suspension of CsC<sub>8</sub> (3.3 mg, 0.014 mmol, 2 equiv.) in d<sub>8</sub>-THF (0.2 mL) was added to a cold (-40°C) stirring dark red solution of **Cs<sub>2</sub>-2** (15.9 mg, 0.00680 mmol, 1 equiv.) in d<sub>8</sub>-THF (0.7 mL) under a N<sub>2</sub> atmosphere. The reaction mixture was left to react under stirring for 20 hs at -40°C, and its evolution was followed by <sup>1</sup>H NMR studies. The <sup>1</sup>H NMR spectrum of the reaction mixture at -40°C shows the slow consumption of the starting material over the course of 20 hs, with the concomitant formation of CsO(Si(O<sup>t</sup>Bu)<sub>3</sub>) salt. (Figure S52). Afterwards it was filtered, yielding an orange solution. The <sup>1</sup>H NMR spectrum at 25°C of the solution in toluene shows the presence of the signals of **Cs<sub>4</sub>-(N)<sub>2</sub>**, the CsO(Si(O<sup>t</sup>Bu)<sub>3</sub>) salt and the decomposition from the first one at δ= 10.49 ppm (s) (Figure S53).

**Reduction of [U(OSi(O<sup>t</sup>Bu)<sub>3</sub>)<sub>3</sub>]<sub>2</sub>(μ-O)], complex **1** with 4 equiv. of CsC<sub>8</sub> in toluene at -40°C under Ar.** A cold (-40°C) bronze suspension of CsC<sub>8</sub> (7.2 mg, 0.031 mmol, 4 eq) in d<sub>8</sub>-toluene (0.2 mL) was added to a cold dark red solution (-40°C) of complex **1** (16.0 mg, 0.00772 mmol, 1 eq) in d<sub>8</sub>-toluene (0.4 mL) under Ar atmosphere. The reaction mixture was left to react under stirring for 20 hs at -40°C, and its evolution was followed by <sup>1</sup>H NMR studies. The <sup>1</sup>H NMR spectrum of the reaction mixture at -40°C shows the consumption of the starting material over the course of 3 hs, with the concomitant formation of **Cs<sub>2</sub>-2**. The reaction does not evolve further over the course of 48 hs (Figure S54).

**Addition of 2.2.2-cryptand to K<sub>2</sub>-2 in THF.** A cold (-80°C) teal solution of complex **1** (9.7 mg, 0.00468 mmol, 1 equiv.) in THF (0.8 mL) was added to a cold (-80°C) bronze suspension of KC<sub>8</sub> (3.2 mg, 0.0237 mmol, 5 equiv.) in THF (0.1 mL). The suspension was stirred at -80 °C for 30 min. The reaction mixture was then filtered on cold (-80°C) glassware. All the volatiles were removed under vacuum at -80 °C and cold d<sub>8</sub>-THF (0.4 mL) added to afford a dark red solution of **K<sub>2</sub>-2**. The <sup>1</sup>H NMR spectrum of the solution at -40°C (Figure S55, bottom) confirmed the presence of **K<sub>2</sub>-2** as a pure species with a resonance at δ= -0.52 ppm (s). A cold (-40°C) colorless solution of 2.2.2-cryptand (1.8 mg, 0.00478 mmol, 1 equiv.) in d<sub>8</sub>-THF (0.2 mL) was added and left to react for 20 min. The <sup>1</sup>H NMR of the reaction mixture at -40°C (Figure S56, middle) shows the shift of the resonance assigned to the siloxides, and the apparition of the resonances for 2.2.2-cryptand. A cold (-40°C) colorless solution of 2.2.2-cryptand (1.8 mg, 0.00478 mmol, 1 equiv.) in in d<sub>8</sub>-THF (0.2 mL) was added and left to react for 20 min. The <sup>1</sup>H NMR of the reaction mixture at -40°C (Figure S55, top) shows the shift of the resonance assigned to the siloxides.

## NMR Spectra

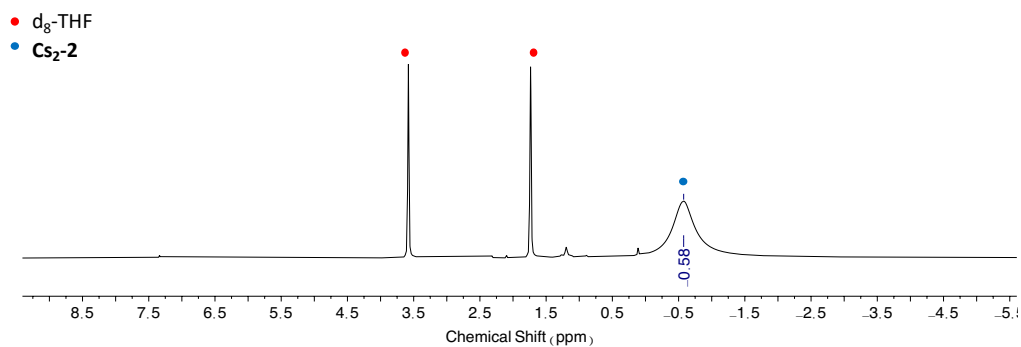

**Figure S1:**  $^1\text{H}$  NMR spectrum (400 MHz,  $d_8\text{-THF}$ , 233 K) of  $[\text{Cs}_2\{\text{U}^{\text{III}}(\text{OSi}(\text{O}^t\text{Bu}))_3\}_2(\mu\text{-O})]$ ,  $\text{Cs}_2\text{-2}$

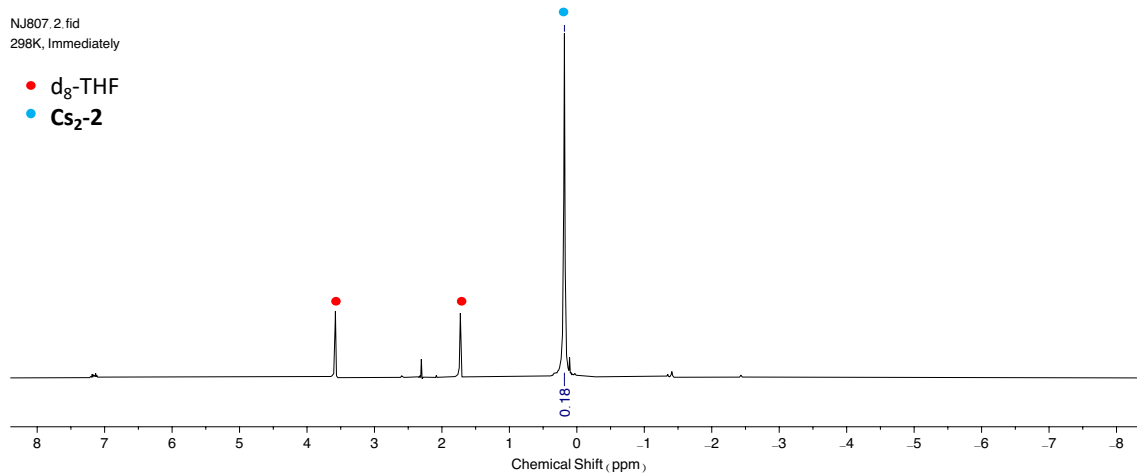

**Figure S2:**  $^1\text{H}$  NMR spectrum (400 MHz,  $d_8\text{-THF}$ , 298 K) of  $\text{Cs}_2\text{-2}$

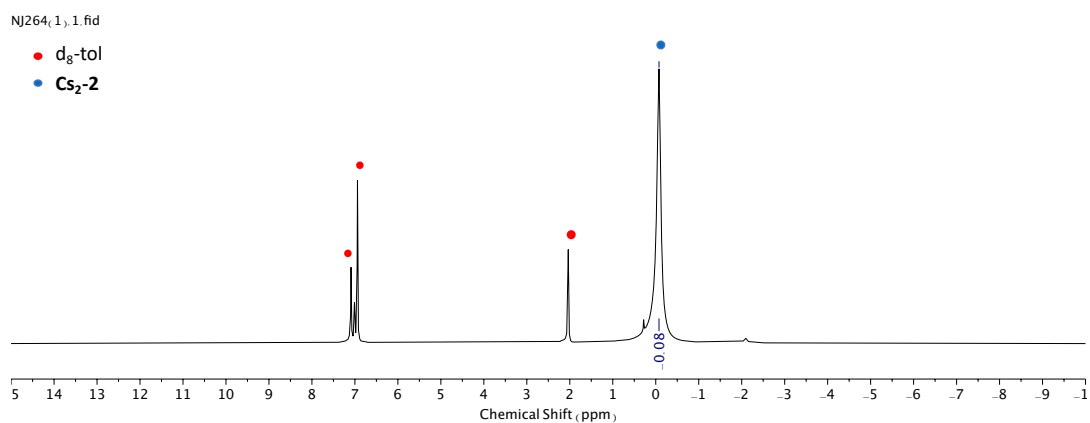

**Figure S3:**  $^1\text{H}$  NMR spectrum (400 MHz,  $d_8\text{-toluene}$ , 233 K) of  $\text{Cs}_2\text{-2}$

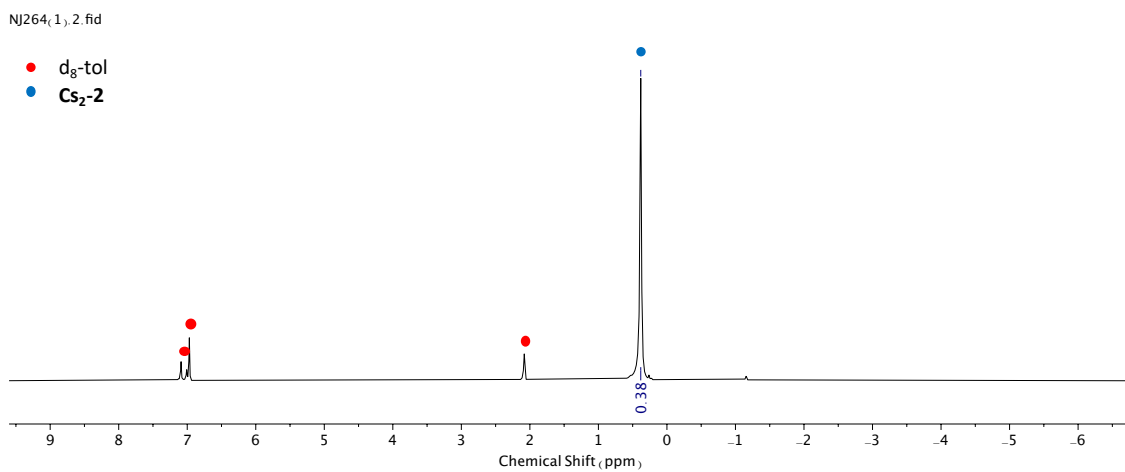

**Figure S4:** <sup>1</sup>H NMR spectrum (400 MHz, d<sub>8</sub>-toluene, 298 K) of Cs<sub>2</sub>-2

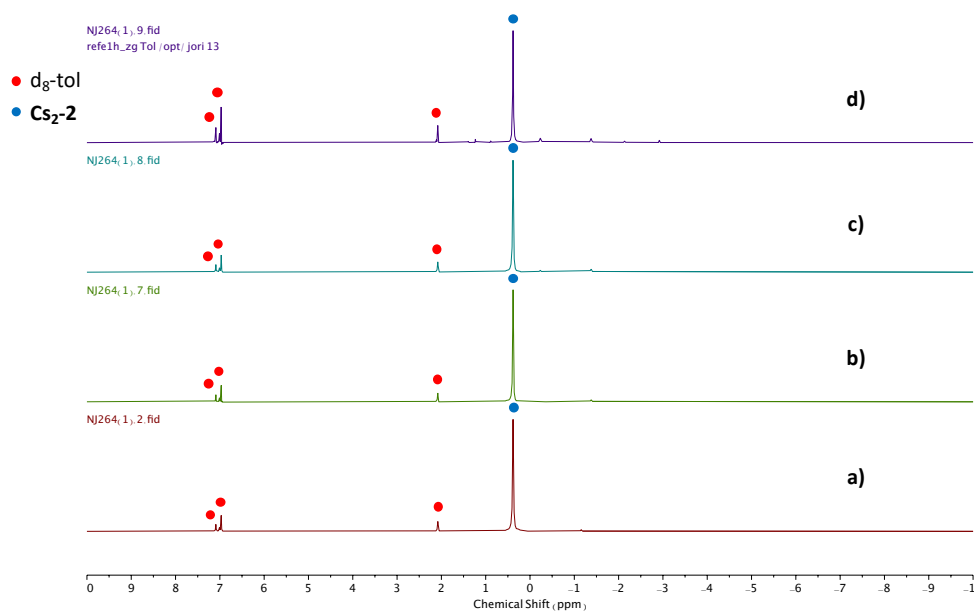

**Figure S5:** <sup>1</sup>H NMR spectrum (400MHz, d<sub>8</sub>-toluene, 298 K) evolution at 298 K of Cs<sub>2</sub>-2 in toluene a) immediately, b) 1 day after, c) 6 days after and d) 17 days after.

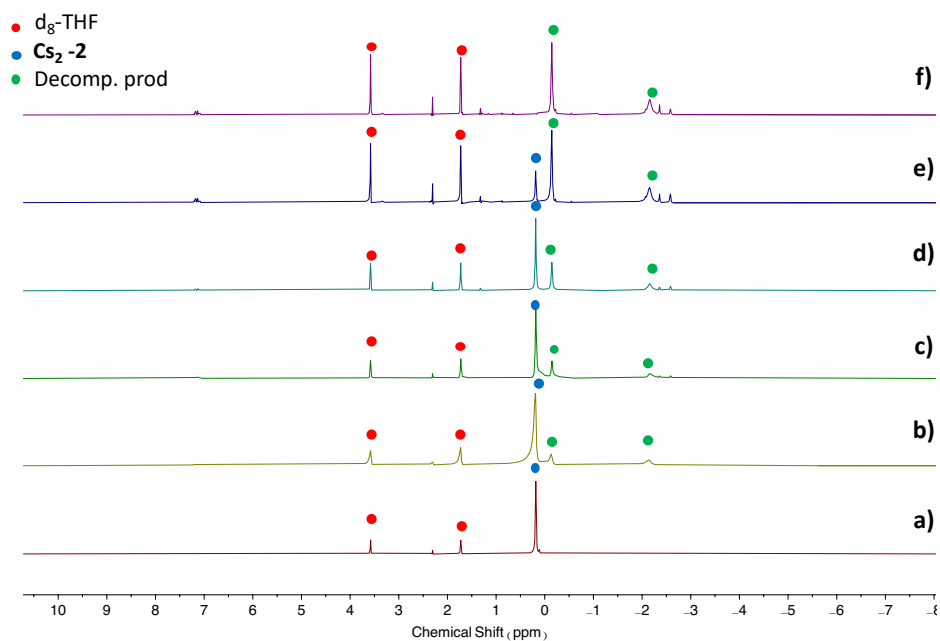

**Figure S6:**  $^1\text{H}$  NMR spectrum (400MHz,  $\text{d}_8\text{-THF}$ , 298 K) evolution at 298 K of  $\text{Cs}_2\text{-2}$  in THF a) immediately, b) 1 day after, c) 2 days after d) 3 days after e) 4 days after and f) 6 days after.

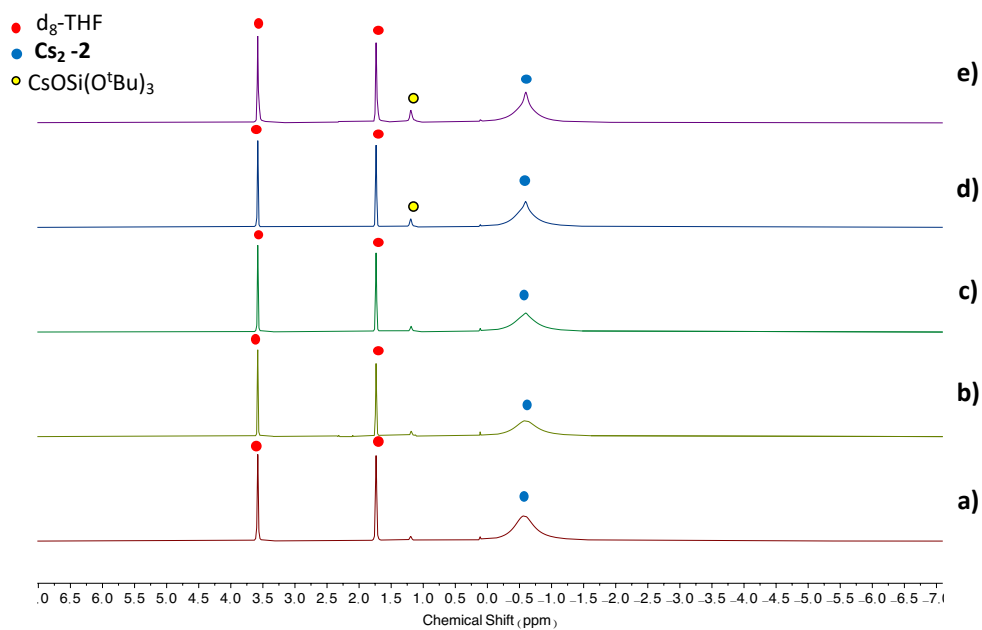

**Figure S7:**  $^1\text{H}$  NMR spectrum (400MHz,  $\text{d}_8\text{-THF}$ , 298 K) evolution at 233 K of  $\text{Cs}_2\text{-2}$  in THF a) immediately, b) 3 days after, c) 6 days after d) 14 days after and e) 21 days after.

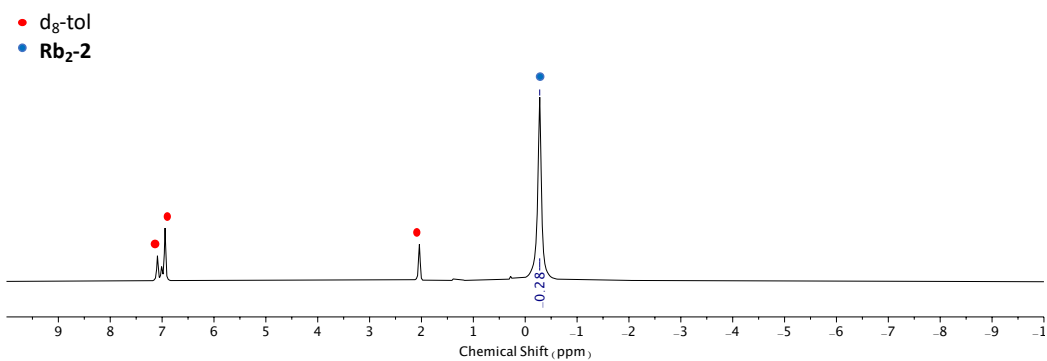

**Figure S8:** <sup>1</sup>H NMR spectrum (400 MHz, d<sub>8</sub>-toluene, 233 K) of [Rb<sub>2</sub>{U<sup>III</sup>(OSi(O<sup>t</sup>Bu))<sub>3</sub>}<sub>2</sub>(μ-O)] **Rb<sub>2</sub>-2**

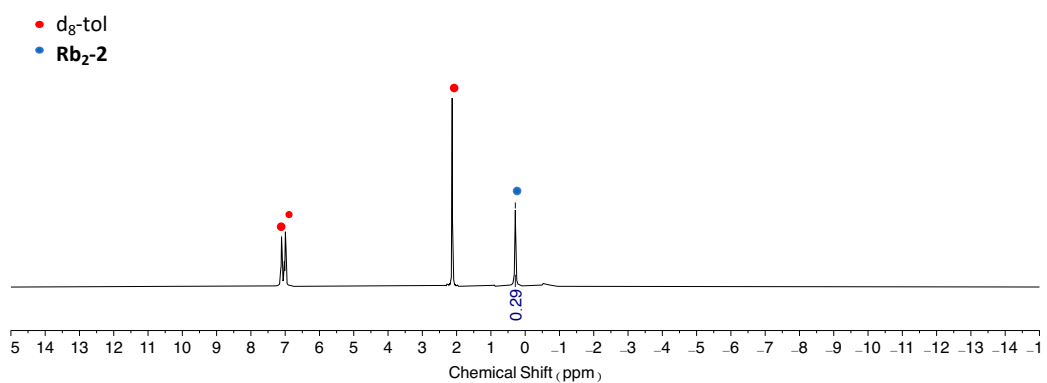

**Figure S9:** <sup>1</sup>H NMR spectrum (400 MHz, d<sub>8</sub>-toluene, 298 K) of **Rb<sub>2</sub>-2**

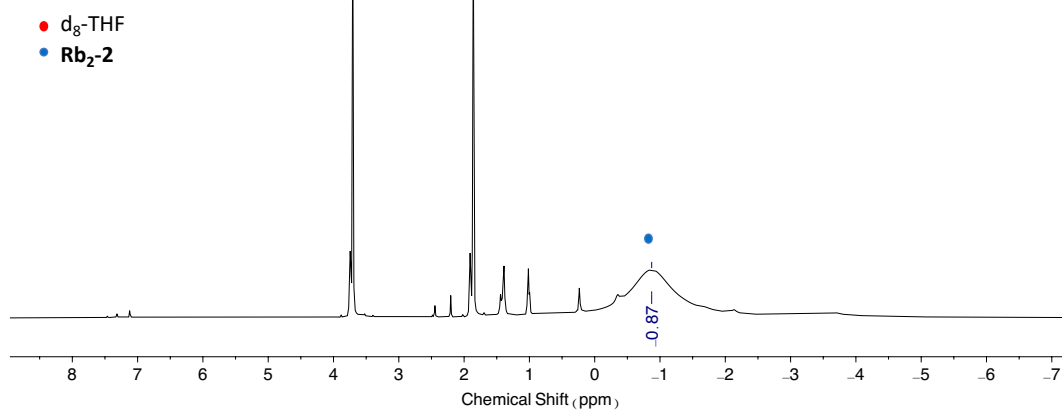

**Figure S10:** <sup>1</sup>H NMR spectrum (400 MHz, d<sub>8</sub>-THF, 233 K) of **Rb<sub>2</sub>-2**



NJ85.1.fid  
refe1h\_zg THF / opt / jori 55

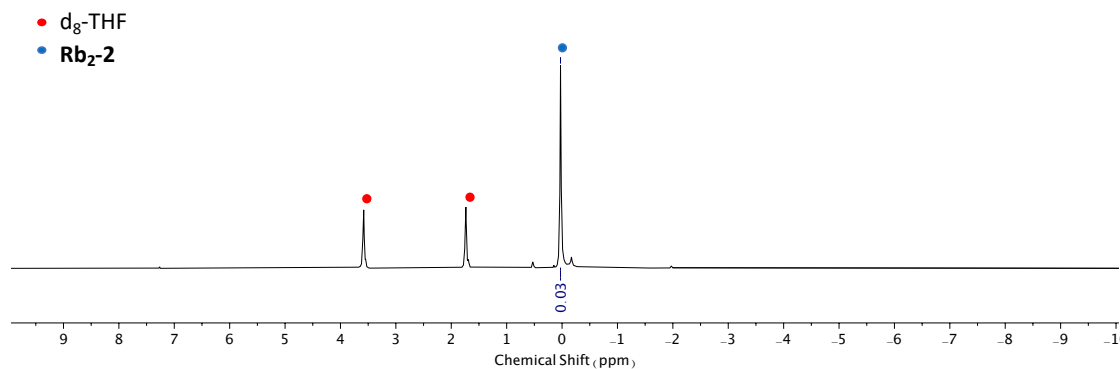

Figure S11:  $^1\text{H}$  NMR spectrum (400 MHz,  $d_8$ -THF, 298 K) of  $\text{Rb}_2\text{-2}$

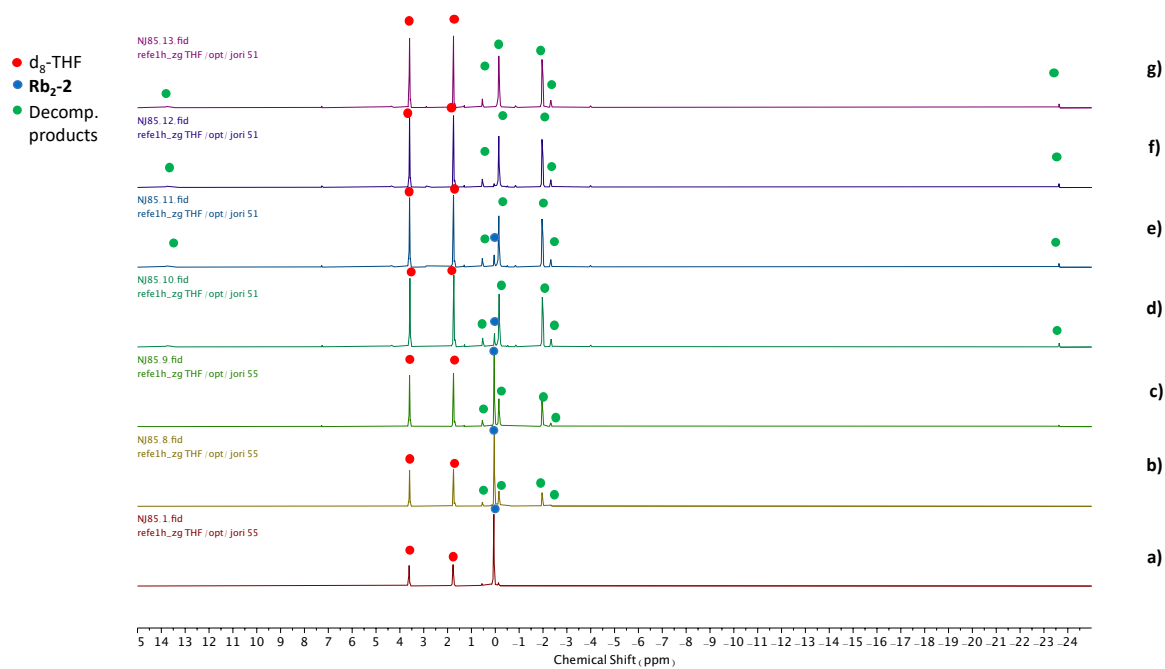

Figure S12:  $^1\text{H}$  NMR spectrum (400MHz,  $d_8$ -THF, 298 K) evolution at 298 K of  $\text{Rb}_2\text{-2}$  in THF a) immediately, b) 1 day after, c) 2 days after d) 4 days after e) 5 days after, f) 6 days after and g) 7 days after.

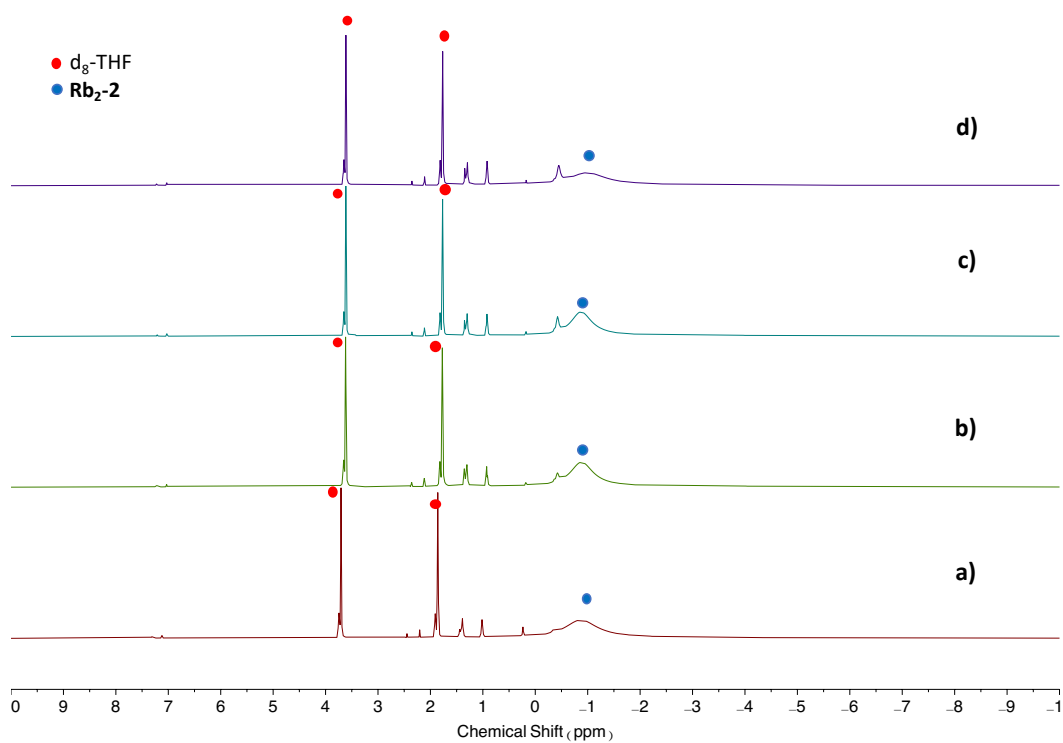

**Figure S13:**  $^1\text{H}$  NMR spectrum (400MHz,  $\text{d}_8\text{-THF}$ , 233 K) evolution at 233 K of  $\text{Rb}_2\text{-2}$  in THF a) immediately, b) 2 days after, c) 6 days after d) 14 days after.

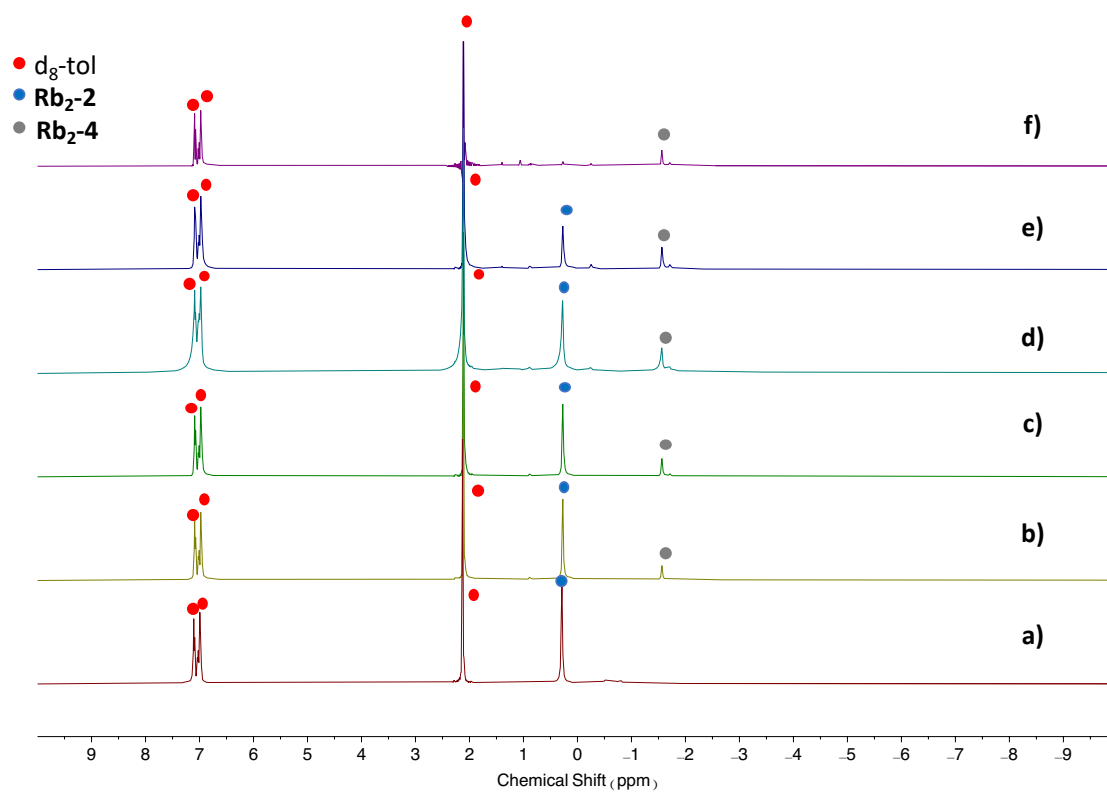

**Figure S14:**  $^1\text{H}$  NMR spectrum (400MHz,  $\text{d}_8\text{-toluene}$ , 298 K) evolution at 298 K of  $\text{Rb}_2\text{-2}$  in toluene a) immediately, b) 6 hs after, c) 12 hs after d) 1 day after e) 2 days after, and f) 5 days after.

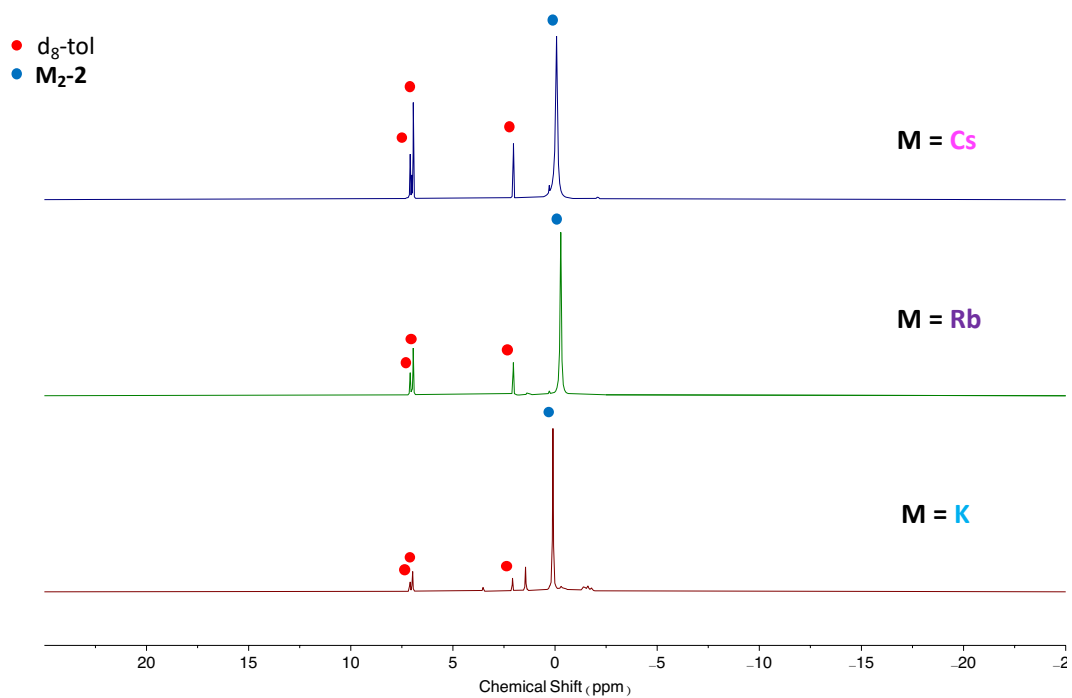

Figure S15:  $^1\text{H}$  NMR spectra (400 MHz,  $d_8$ -toluene, 233 K) comparison of  $\text{M}_2\text{-2}$  in toluene solution at  $-40^\circ\text{C}$ .  $\text{M} = \text{K}$  (bottom),  $\text{Rb}$  (middle) and  $\text{Cs}$  (top)

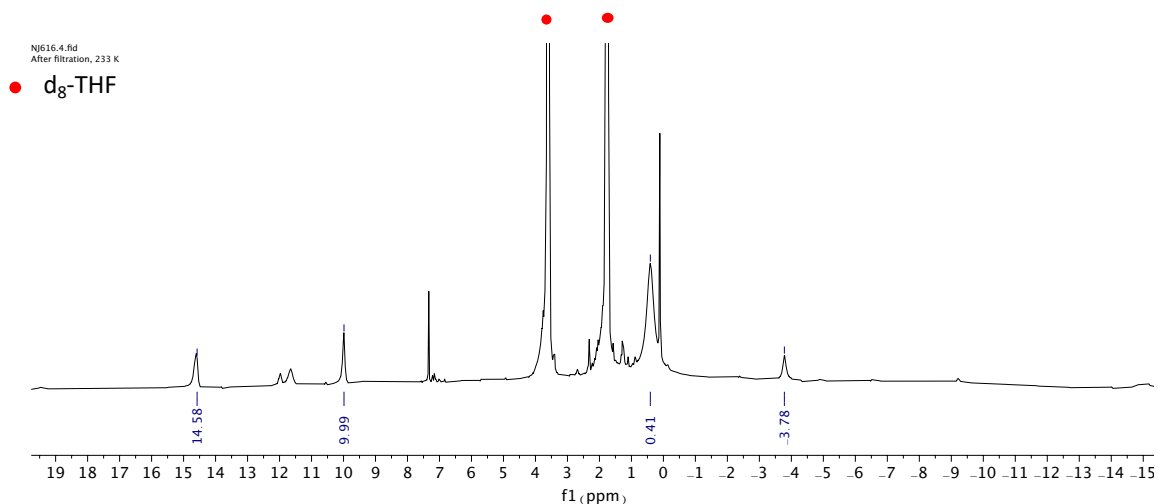

Figure S16:  $^1\text{H}$  NMR spectrum (400 MHz,  $d_8$ -THF, 233 K) of the reaction mixture of **1** with excess  $\text{Na}^0$  mirror after 24 h at  $-40^\circ\text{C}$

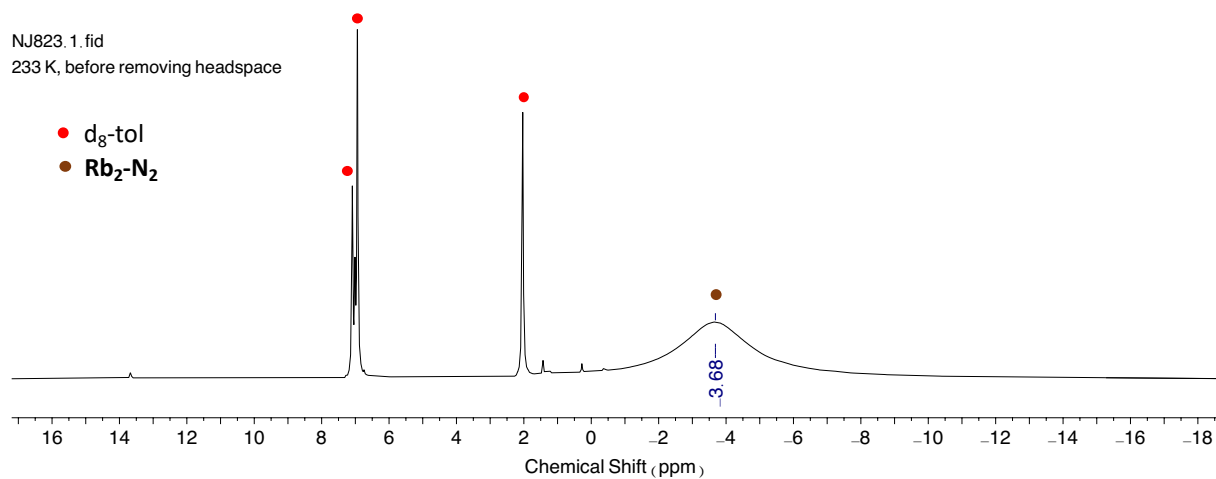

Figure S17:  $^1\text{H}$  NMR spectrum (400 MHz, 233 K,  $d_8$ -toluene) of  $\text{Rb}_2\text{-N}_2$

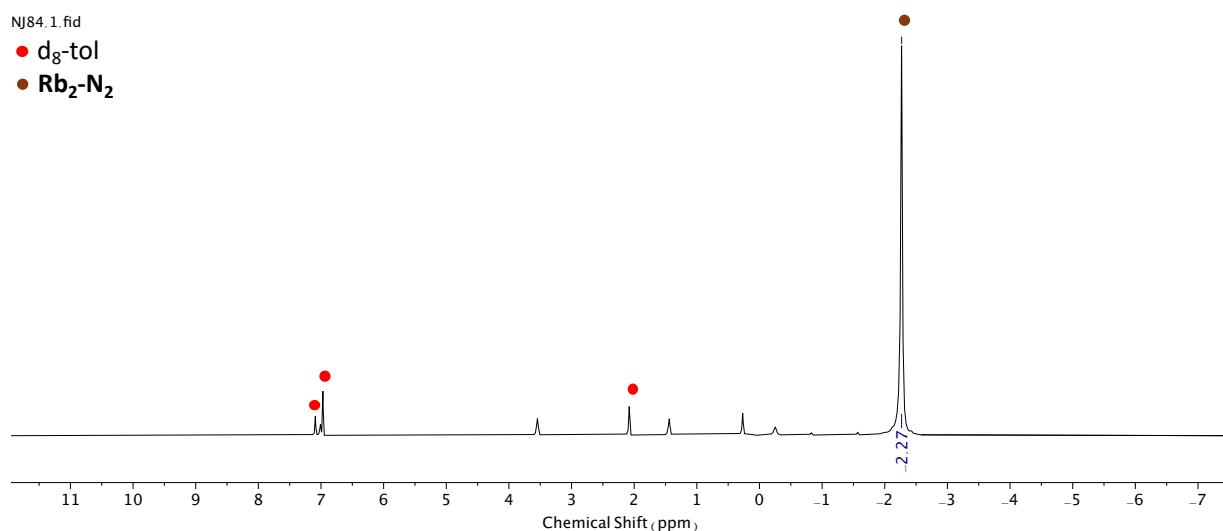

Figure S18: <sup>1</sup>H NMR spectrum (400 MHz, 298 K, d<sub>8</sub>-toluene) of Rb<sub>2</sub>-N<sub>2</sub>

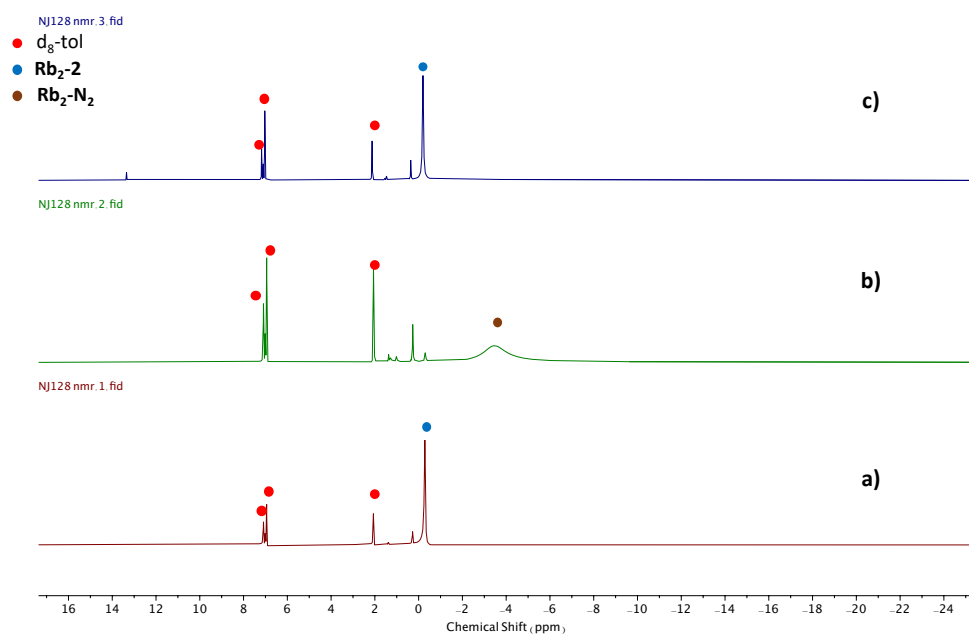

Figure S19: <sup>1</sup>H NMR spectra (400 MHz, d<sub>8</sub>-toluene, 233 K) comparison of the reaction mixture of Rb<sub>2</sub>-2 a) before, b) after addition of 1 atm N<sub>2</sub> and c) after removing all the volatiles and leaving the resulting solid under vacuum at -80°C for 1 h (top)

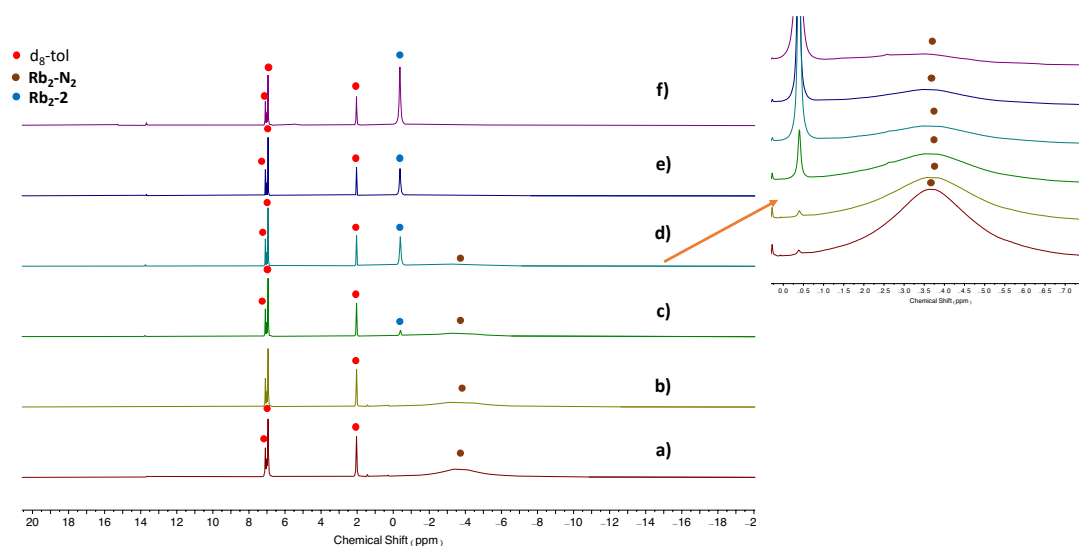

**Figure S20:**  $^1\text{H}$  NMR spectra (400 MHz,  $d_8$ -toluene, 233 K) comparison of the reaction mixture of  $\text{Rb}_2\text{-N}_2$  a) before, b) immediately after, c) 1 day after, d) 4 days after, e) 7 days after and f) 15 days after removing the headspace in the Ar glovebox

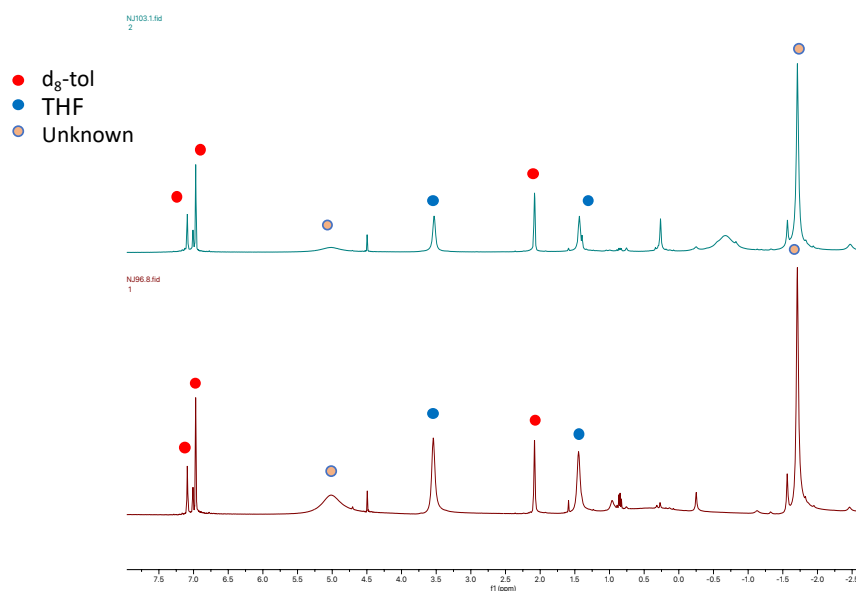

**Figure S21:**  $^1\text{H}$  NMR spectra (400 MHz,  $d_8$ -toluene, 233 K) comparison of the reaction mixture of in situ generated  $\text{Rb}_2\text{-2}$  24 hs after addition 1 atm  $\text{H}_2$  (top) and 24 hs after addition of  $\text{H}_2$  to in situ generated  $\text{Rb}_2\text{-N}_2$  (bottom)

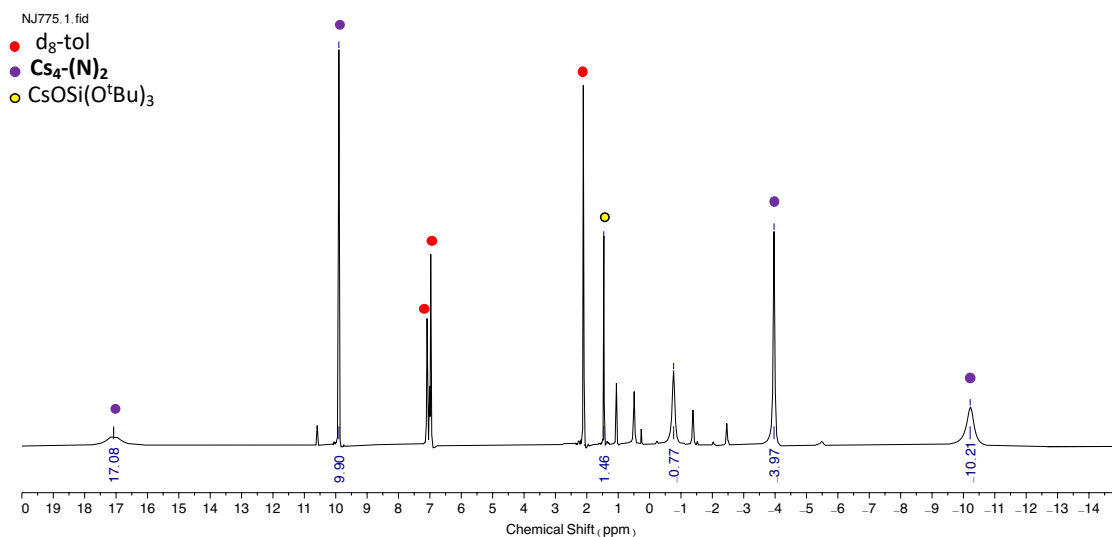

**Figure S22:**  $^1H$  NMR spectrum (400 MHz,  $d_8$ -toluene, 298 K) of the reaction mixture obtained after addition of 2 equiv. of  $CsC_8$  to complex  $Cs_2-2$  after 24 hs at 233 K under a  $N_2$  atmosphere.

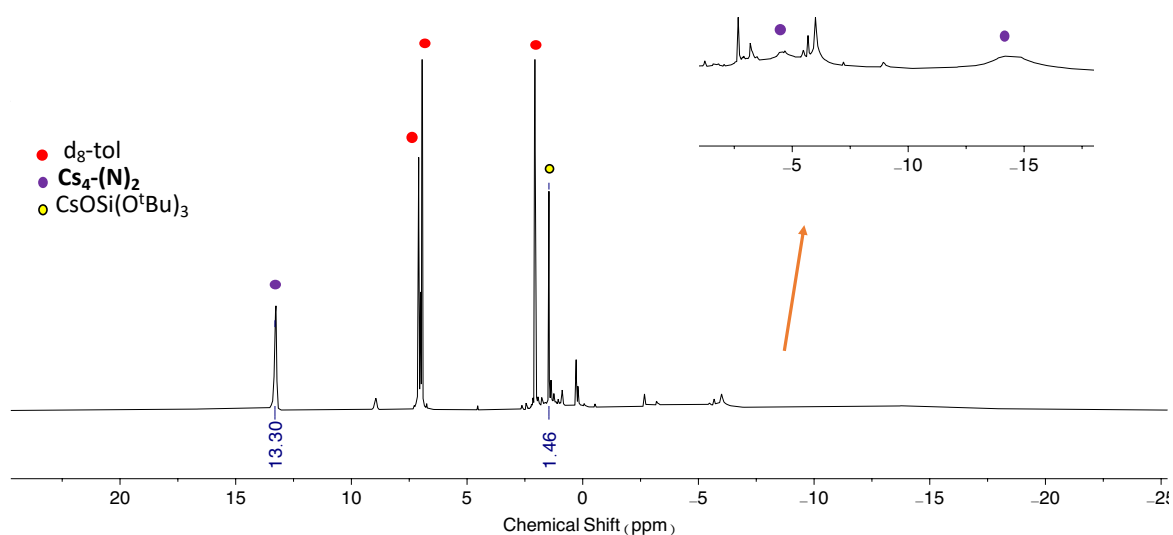

**Figure S23:**  $^1H$  NMR spectrum (400 MHz,  $d_8$ -toluene, 233 K) of the reaction mixture obtained after addition of 2 equiv. of  $CsC_8$  to complex  $Cs_2-2$  after 24 hs at 233 K under a  $N_2$  atmosphere.

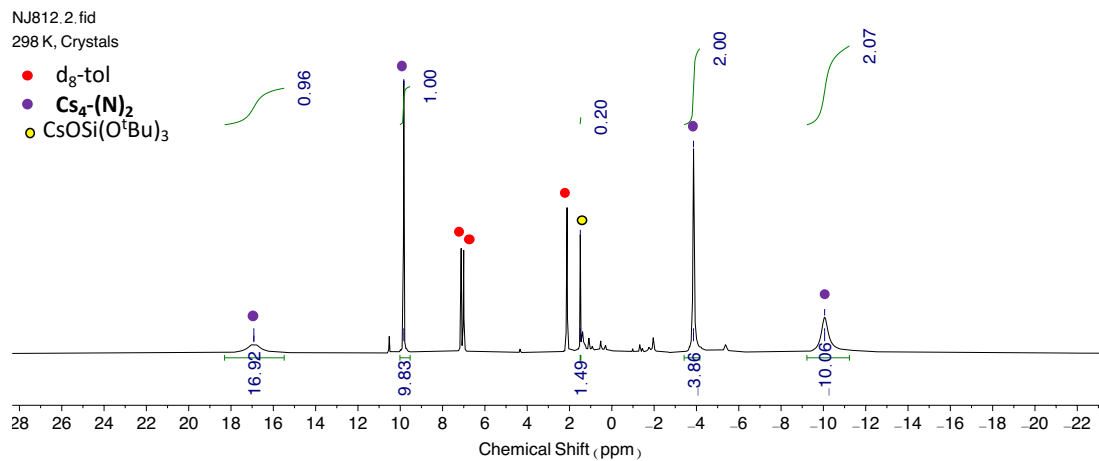

**Figure S24:**  $^1H$  NMR spectrum (400 MHz,  $d_8$ -toluene, 298 K) of crystals of  $Cs_4(N)_2$

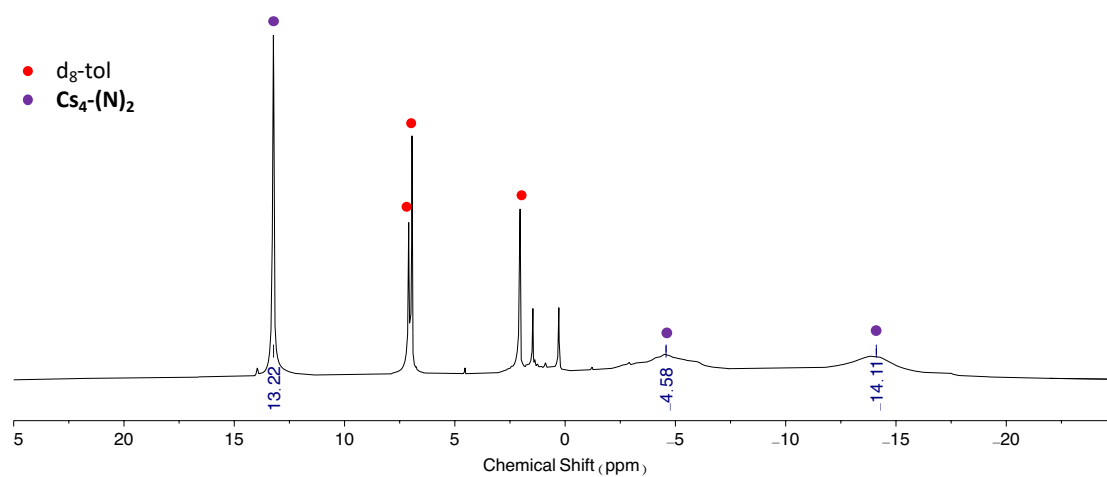

Figure S25:  $^1H$  NMR spectrum (400 MHz,  $d_8$ -toluene, 233 K) of crystals of  $Cs_4-(N)_2$

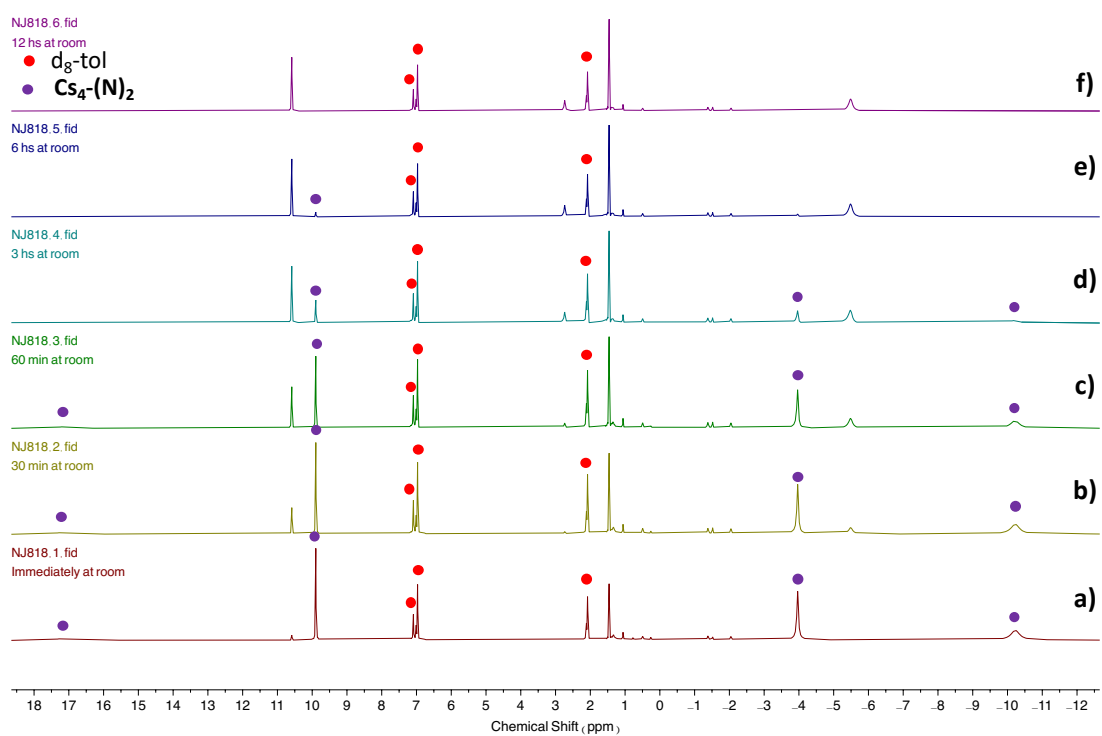

Figure S26:  $^1H$  NMR spectrum (400MHz,  $d_8$ -toluene, 298 K) evolution at 298 K of  $Cs_4-(N)_2$  in toluene a) immediately, b) 30 min after, c) 1h after d) 3 hs after e) 6 hs after and f) 12 hs after.

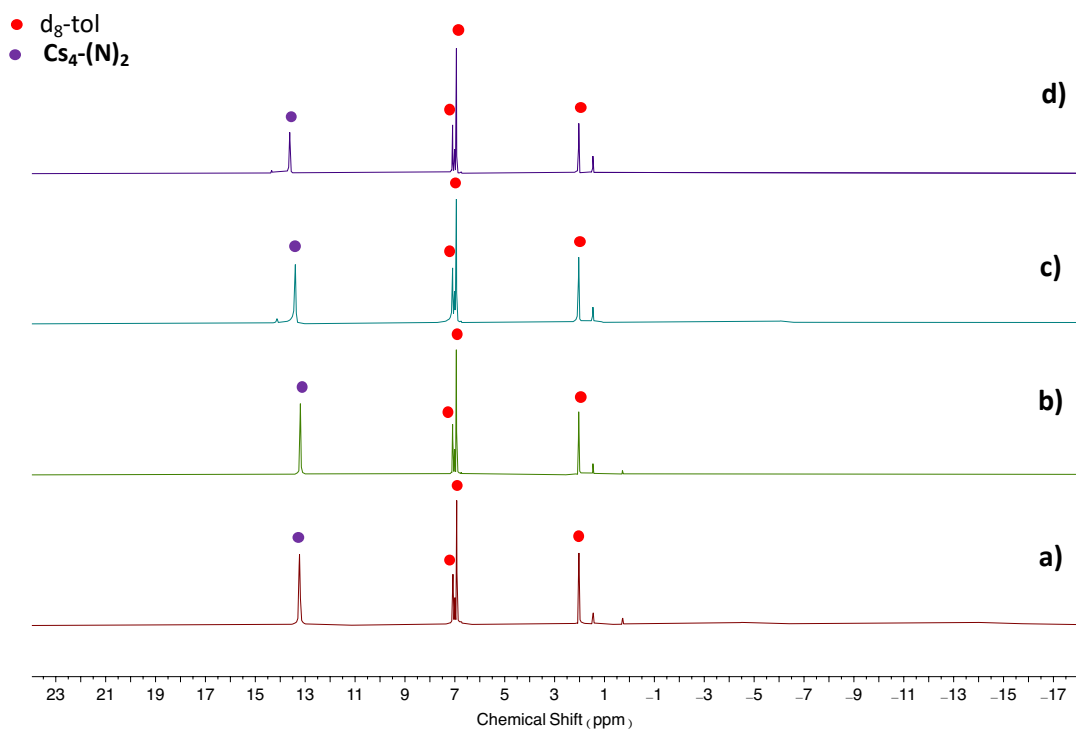

**Figure S27:**  $^1\text{H}$  NMR spectrum (400MHz,  $d_8$ -toluene, 233 K) evolution at 233 K of  $\text{Cs}_4\text{-(N)}_2$  in toluene a) immediately, b) 3 days after, c) 10 days after and d) 14 days after.

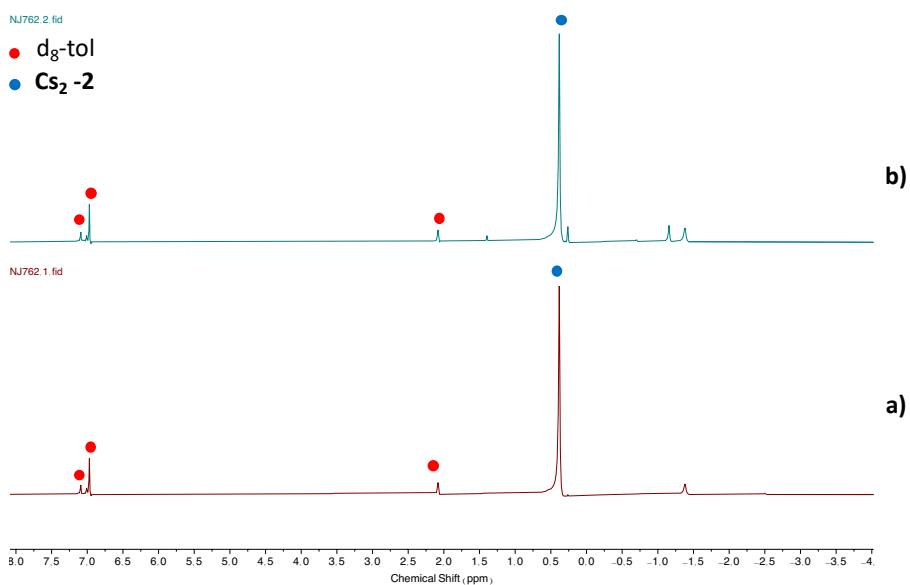

**Figure S28:**  $^1\text{H}$  NMR spectra (400 MHz,  $d_8$ -toluene, 298 K) comparison. of the reaction mixture of complex  $\text{Cs}_2\text{-2}$  a) before and b) 15 hs after addition of 2 equiv. of  $\text{CsC}_8$  at 233 K under an Ar atmosphere.



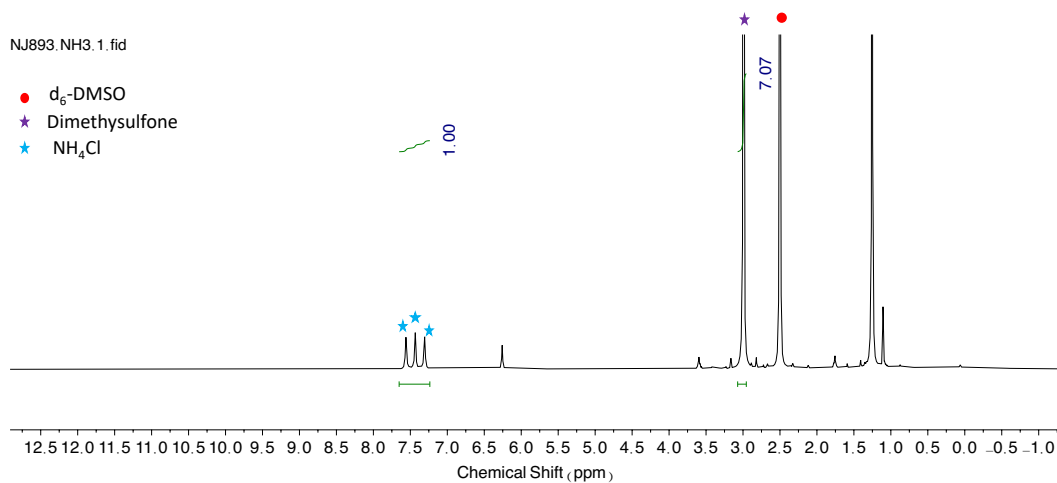

**Figure S29:**  $^1\text{H}$  NMR spectrum (400 MHz,  $d_6$ -DMSO, 298 K) of the residue after evaporation of the reaction mixture resulting from the reaction of complex **Cs<sub>2</sub>-2** with 2 equiv. of  $\text{CsC}_8$  at 233 K for 24 hs under  $\text{N}_2$  atmosphere, after addition of excess 2M HCl ( $\text{Et}_2\text{O}$ ).

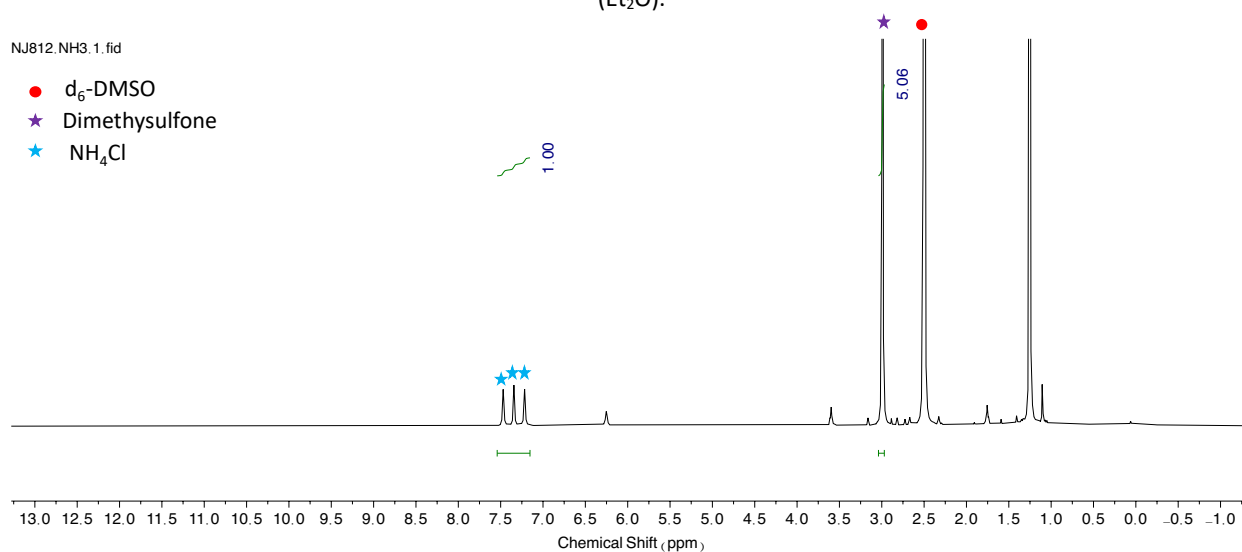

**Figure S30:**  $^1\text{H}$  NMR spectrum (400 MHz,  $d_6$ -DMSO, 298 K) of the residue after evaporation of the solution obtained from the addition of excess 2M HCl ( $\text{Et}_2\text{O}$ ) to isolated complex **Cs<sub>4</sub>-(N)<sub>2</sub>**.

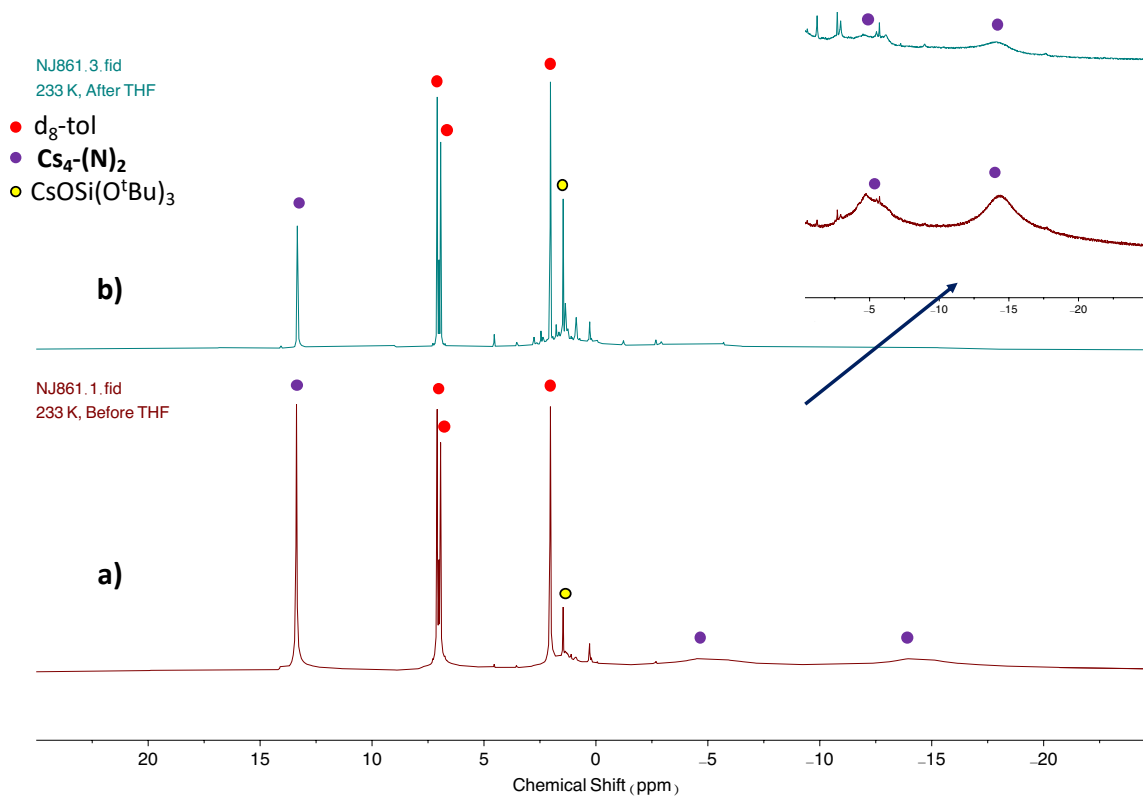

**Figure S31:**  $^1H$  NMR spectra (400 MHz,  $d_8$ -toluene, 233 K) comparison of the crystals of  $Cs_4-(N)_2$  a) before and b) after dissolution in  $d_8$ -THF at  $-40^\circ C$ .

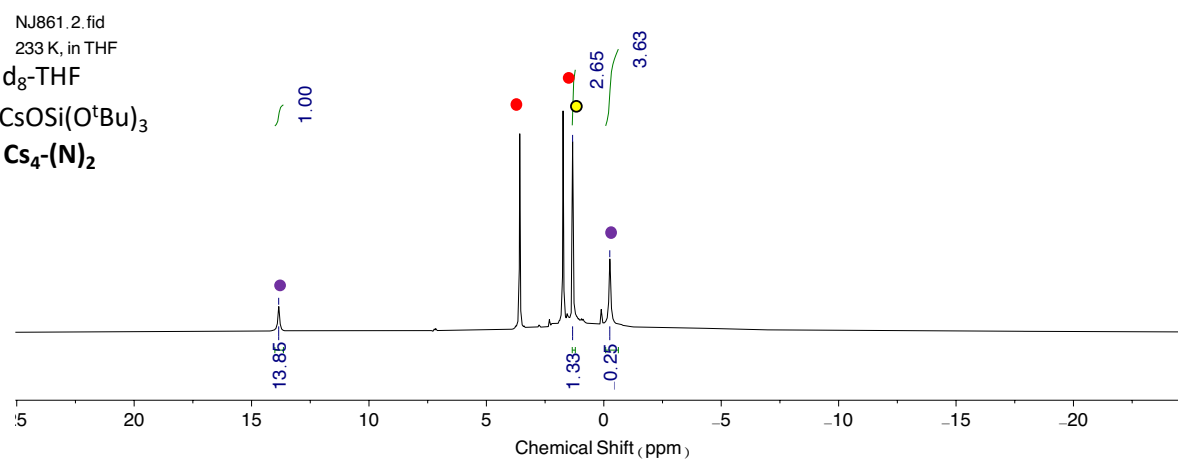

**Figure S32:**  $^1H$  NMR spectrum (400 MHz,  $d_8$ -THF, 233 K) of crystals of  $Cs_4-(N)_2$

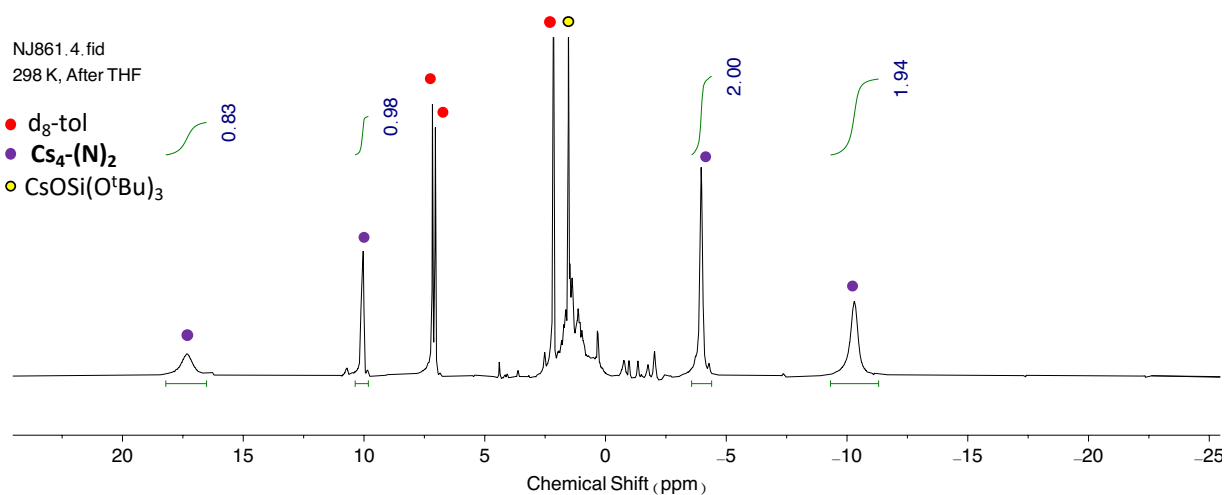

**Figure S33:**  $^1H$  NMR spectrum (400 MHz,  $d_8$ -toluene, 298 K) of crystals of  $Cs_4(N)_2$  after dissolution in THF at  $-40^\circ C$ .

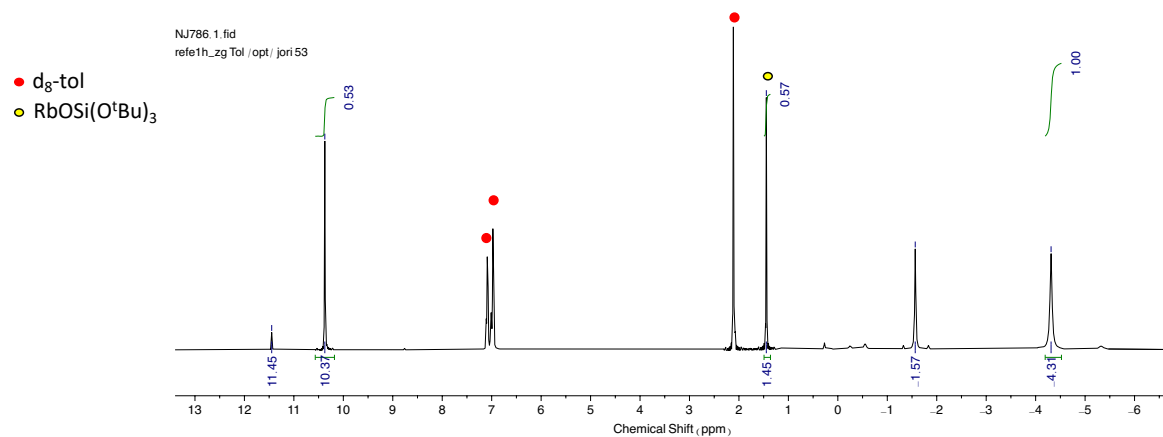

**Figure S34:**  $^1H$  NMR spectrum (400 MHz,  $d_8$ -toluene, 298 K) of the reaction mixture obtained after addition of 2 equiv. of  $RbC_8$  to complex  $Rb_2-N_2$  after 24 hs at 233 K under a  $N_2$  atmosphere.

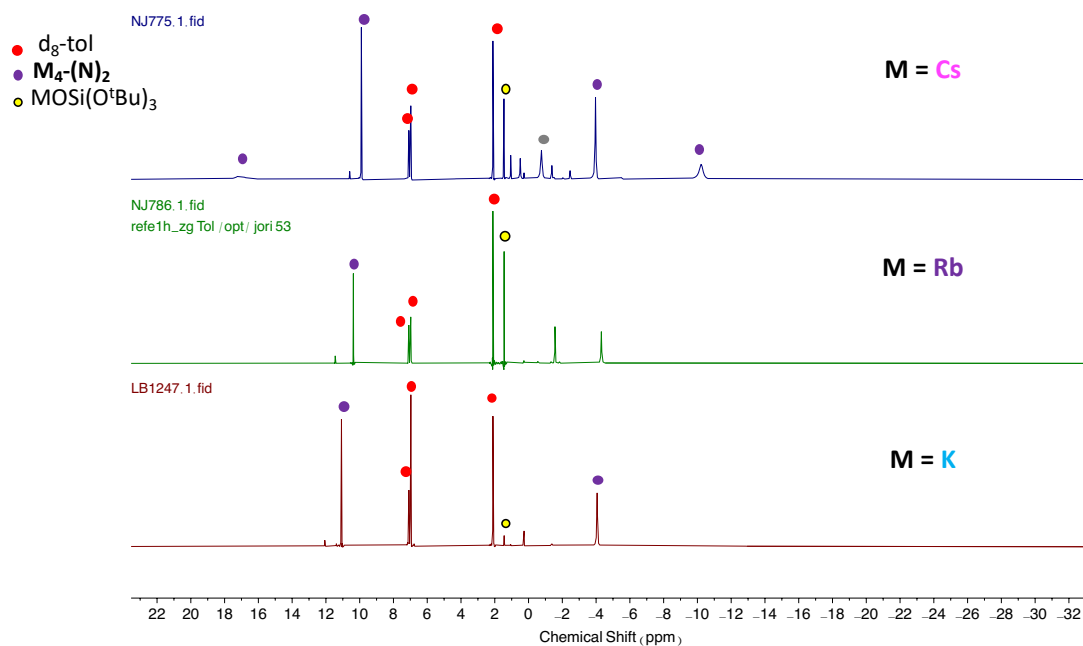

**Figure S35:**  $^1H$  NMR spectra (400 MHz,  $d_8$ -toluene, 298 K) comparison of the reaction mixture obtained after addition of 2 equiv. of  $MC_8$  to complex  $K_2-N_2$  (bottom, redrawn from <sup>5</sup>),  $Rb_2-N_2$  (middle) and  $Cs_2-2$  (top) after 24 hs at 233 K under a  $N_2$  atmosphere.

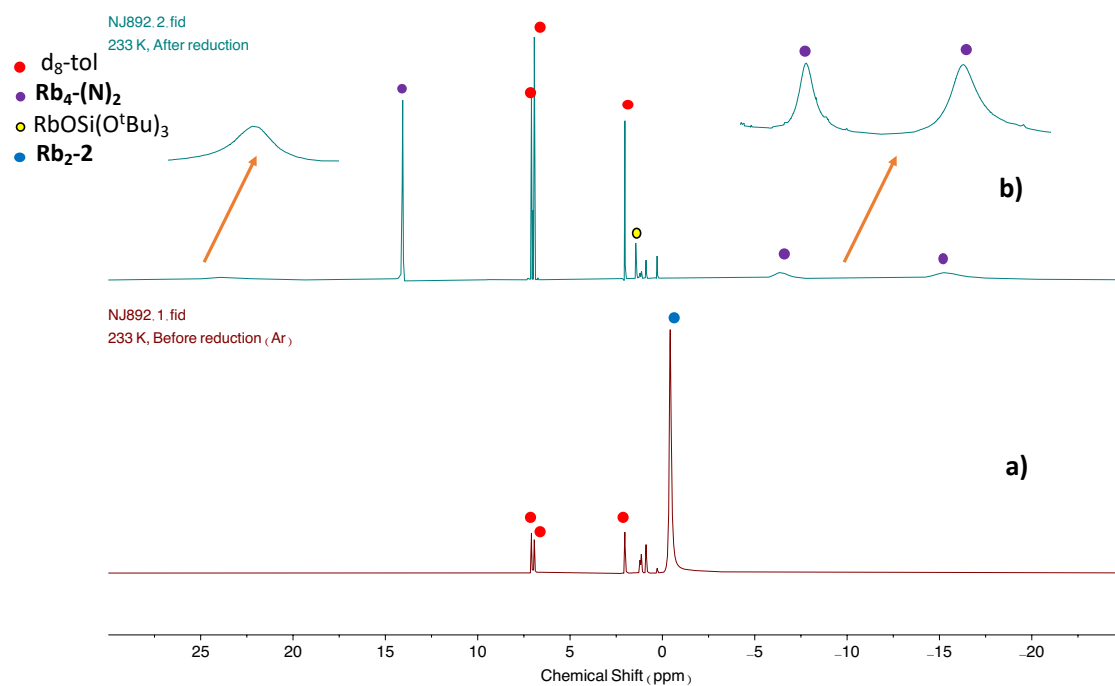

**Figure S36:**  $^1H$  NMR spectrum (400 MHz,  $d_8$ -toluene, 233 K) of the reaction mixture of complex  $Rb_2-2$  a) before (under Ar) and b) 24 hs after addition of 2 equiv. of  $RbC_8$  at 233 K under a  $N_2$  atmosphere.

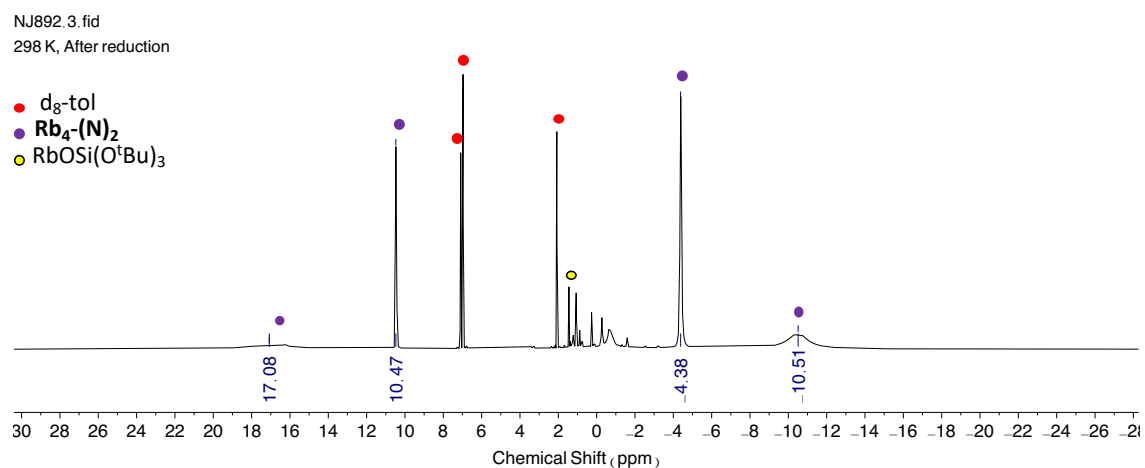

**Figure S37:**  $^1H$  NMR spectrum (400 MHz,  $d_8$ -toluene, 298 K) of the reaction mixture obtained after addition of 2 equiv. of  $RbC_8$  to complex  $Rb_2-2$  after 24 hs at 233 K under a  $N_2$  atmosphere.

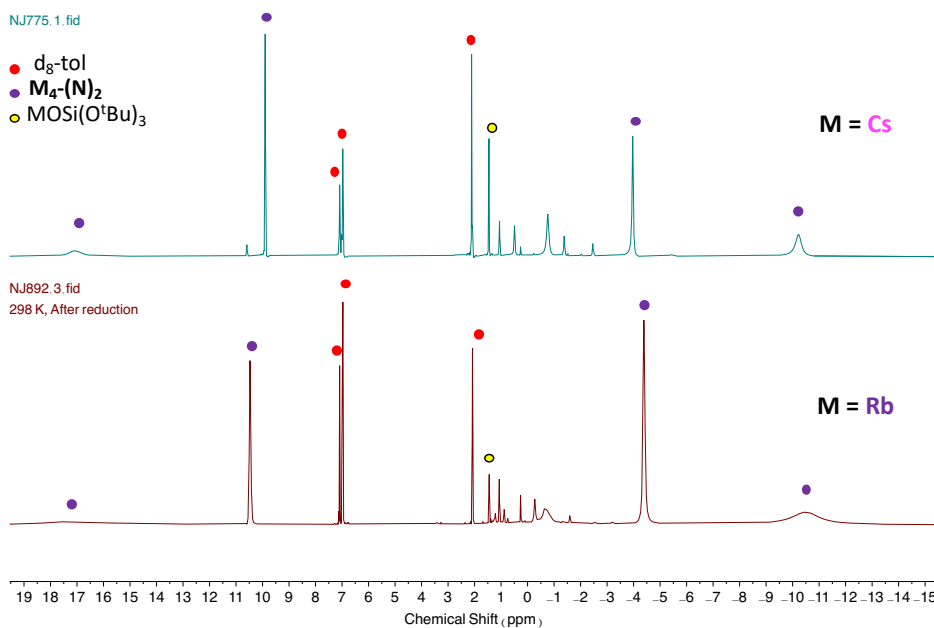

**Figure S38:**  $^1\text{H}$  NMR spectra (400 MHz,  $d_8$ -toluene, 298 K) comparison of the reaction mixture obtained after addition of 2 equiv. of  $\text{MC}_8$  to complex  $\text{Rb}_2\text{-2}$  (bottom) and  $\text{Cs}_2\text{-2}$  (top) after 24 hs at 233 K under a  $\text{N}_2$  atmosphere.

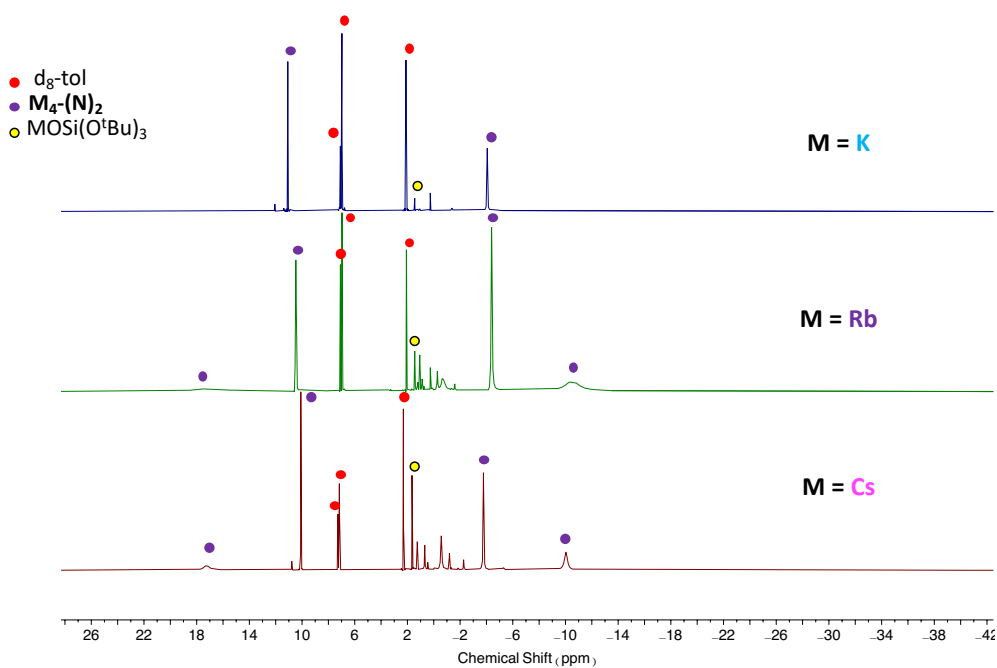

**Figure S39:**  $^1\text{H}$  NMR spectra (400 MHz,  $d_8$ -toluene, 298 K) comparison of the reaction mixture obtained after addition of 2 equiv. of  $\text{MC}_8$  to complex  $\text{K}_2\text{-N}_2$  (top redrawn from <sup>5</sup>),  $\text{Rb}_2\text{-2}$  (middle) and  $\text{Cs}_2\text{-2}$  (bottom) after 24 hs at 233 K under a  $\text{N}_2$  atmosphere.

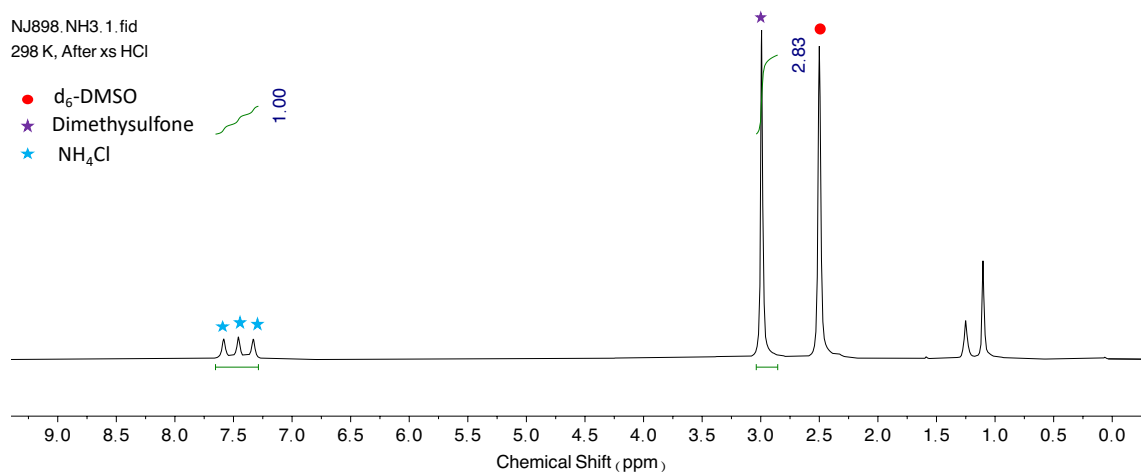

**Figure S40:**  $^1H$  NMR spectrum (400 MHz,  $d_6$ -DMSO, 298 K) of the residue after evaporation of the reaction mixture resulting from the reaction of complex **Rb<sub>2</sub>-2** with 2 equiv. of  $RbC_8$  at 233 K for 24 hs under  $N_2$  atmosphere, after addition of excess 2M HCl ( $Et_2O$ ).

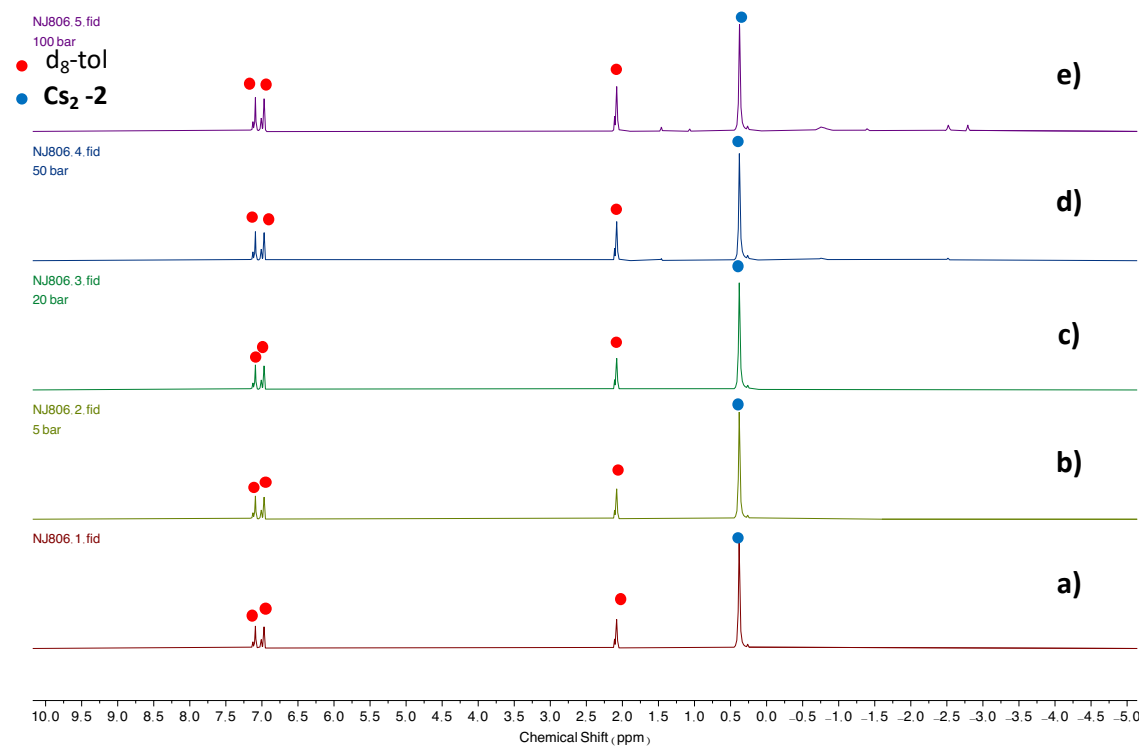

**Figure S41:**  $^1H$  NMR spectra (400 MHz,  $d_8$ -toluene, 298 K) comparison. of the reaction mixture of complex **Cs<sub>2</sub>-2** a) before and after addition of b) 5 bar, c) 10 bar, d) 20 bar, d) 50 bar and e) 100 bar of  $N_2$  at 298 K.

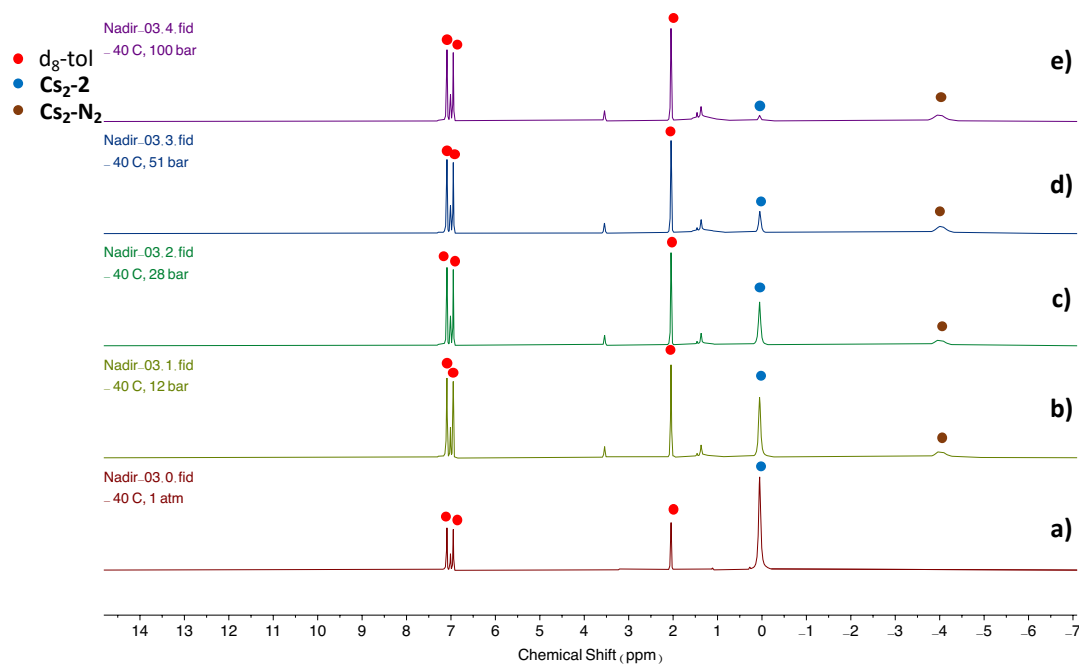

**Figure S42:**  $^1H$  NMR spectra (400 MHz,  $d_8$ -toluene, 233 K) comparison. of the reaction mixture of complex  $Cs_2-2$  a) before and after addition of b) 12 bar, c) 28 bar, d) 51 bar and e) 100 bar of  $N_2$  at 233 K.

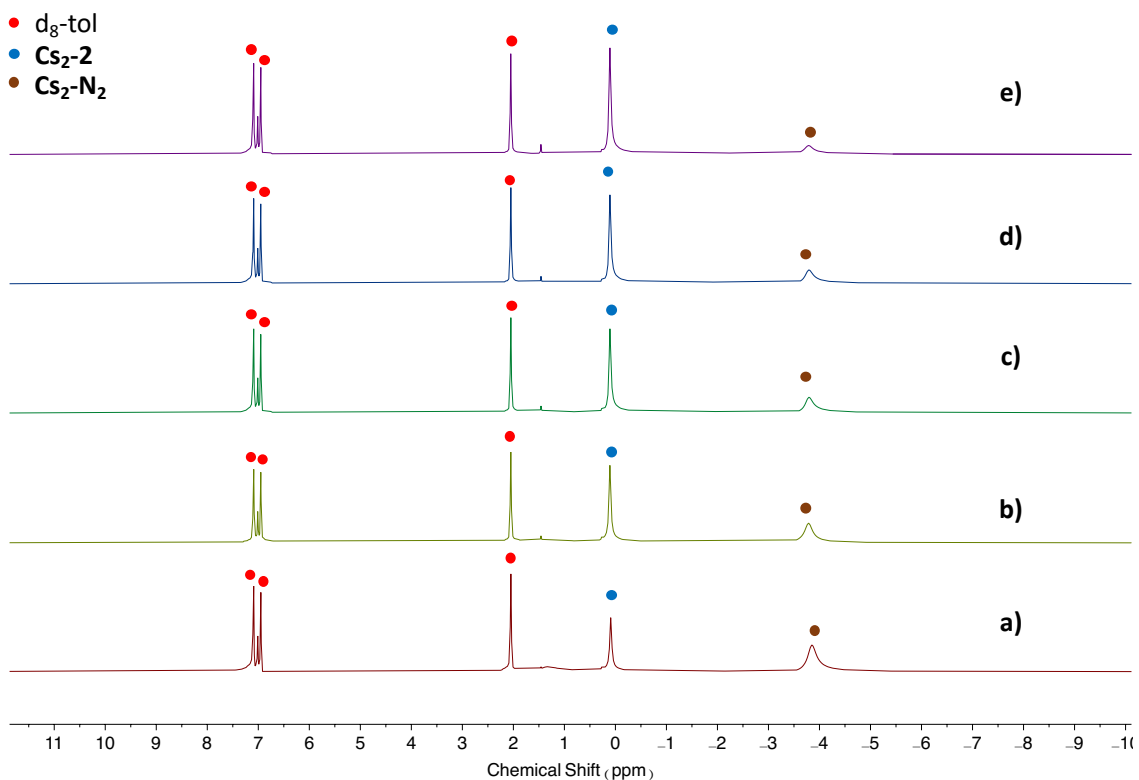

**Figure S43:**  $^1H$  NMR spectra (400 MHz,  $d_8$ -toluene, 233 K) comparison. of the reaction mixture of complex  $Cs_2-2$  a) immediately after b) 1h after c) 2 hs after, d) 3 hs after, d) 16 hs removal of high pressure  $N_2$  and evolution at 233K.

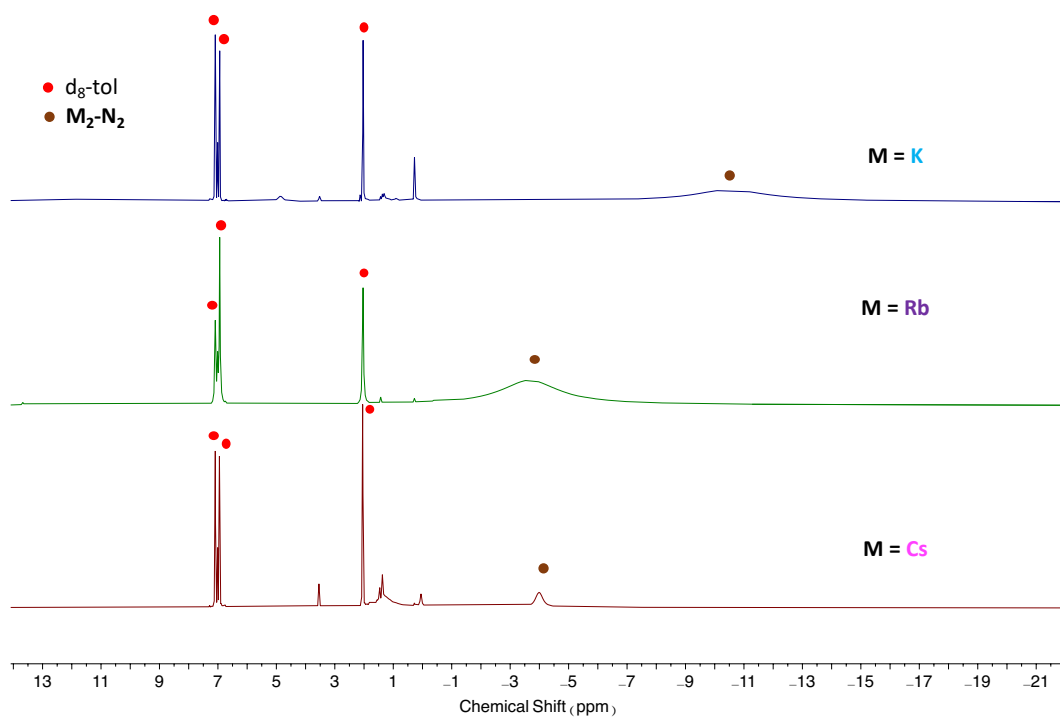

**Figure S44:**  $^1\text{H}$  NMR spectra (400 MHz,  $d_8$ -toluene, 233 K) comparison of  $\text{M}_2\text{-N}_2$  in toluene solution at  $-40^\circ\text{C}$ . M = Cs (bottom), Rb (middle) and K (top)

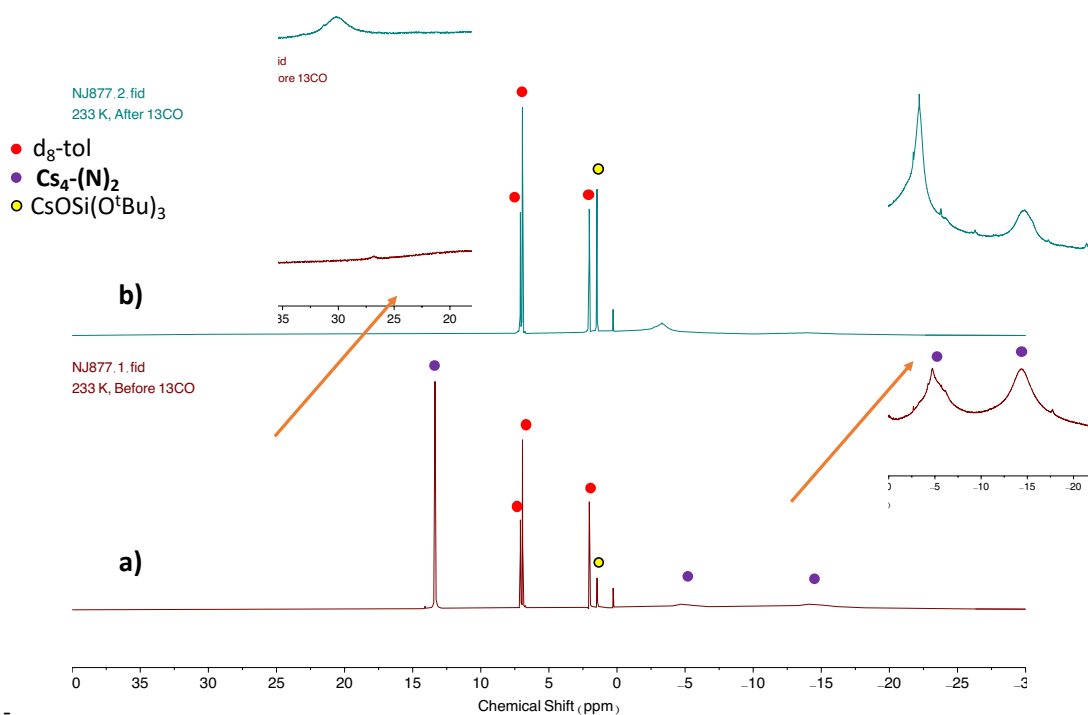

**Figure S45:**  $^1\text{H}$  NMR spectra (400 MHz,  $d_8$ -toluene, 233 K) evolution of the reaction mixture of complex  $\text{Cs}_4\text{-(N)}_2$  a) before and b) immediately after addition of 5 equiv. of  $^{13}\text{CO}$  at 233 K.



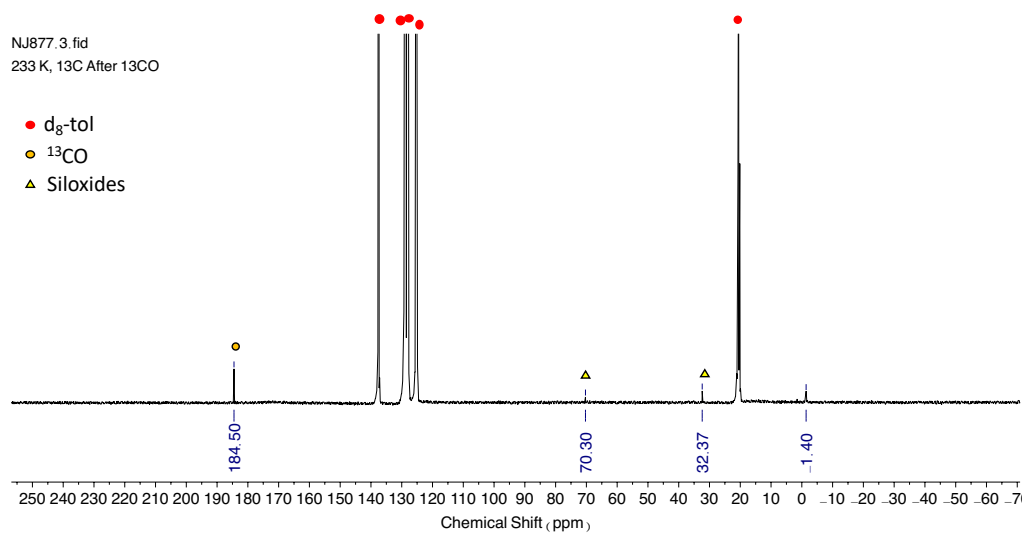

**Figure S46:**  $^{13}\text{C}$   $\{^1\text{H}\}$  NMR spectrum (100 MHz,  $d_8$ -toluene, 233 K) of the reaction mixture of complex  $\text{Cs}_4\text{-(N)}_2$  immediately after addition of 5 equiv. of  $^{13}\text{CO}$  at 233 K.

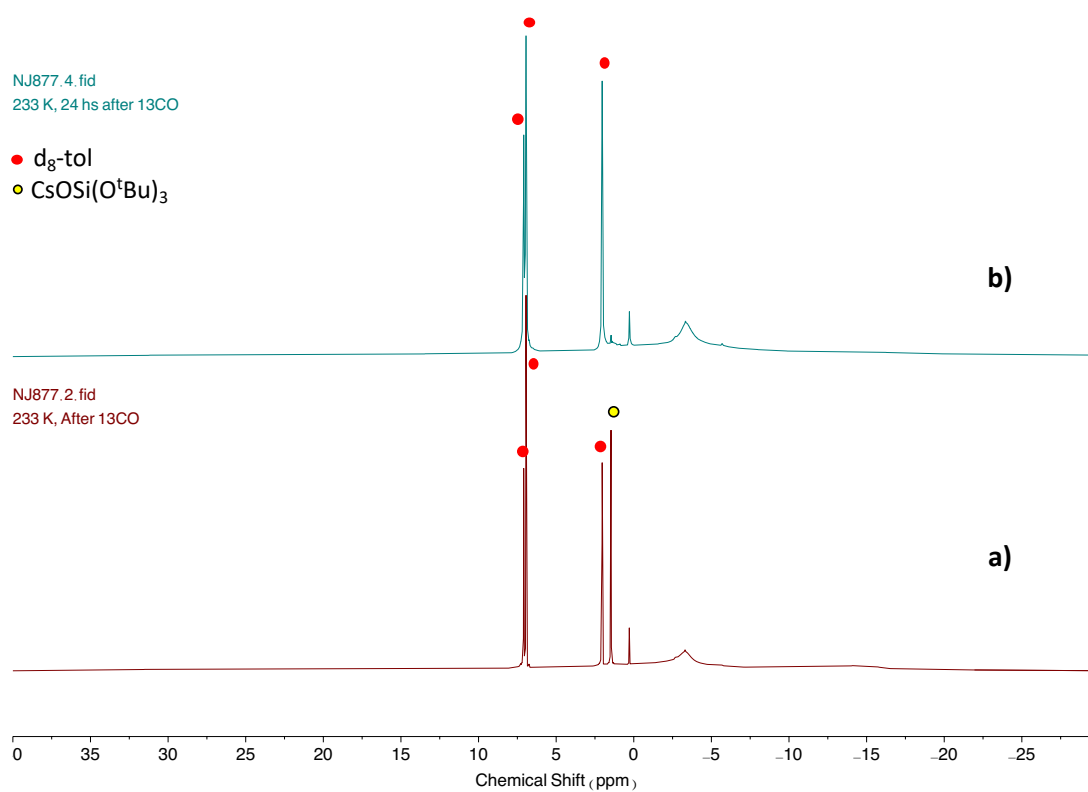

**Figure S47:**  $^1\text{H}$  NMR spectra (400 MHz,  $d_8$ -toluene, 233 K) evolution of the reaction mixture of complex  $\text{Cs}_4\text{-(N)}_2$  a) immediately after and b) 24 hs after addition of 5 equiv. of  $^{13}\text{CO}$  at 233 K.

NJ877.5.fid  
298 K, 24 hs after  $^{13}\text{C}\text{O}$

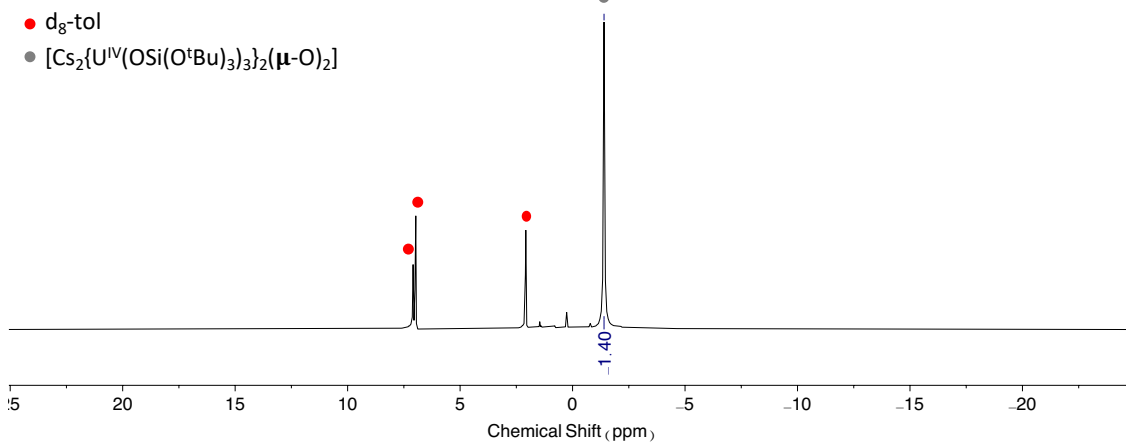

**Figure S48:**  $^1\text{H}$  NMR spectrum (400 MHz,  $d_8$ -toluene, 298 K) of the reaction mixture of complex  $\text{Cs}_4\text{-(N)}_2$  24 hs after addition of 5 equiv. of  $^{13}\text{C}\text{O}$  at 233 K.

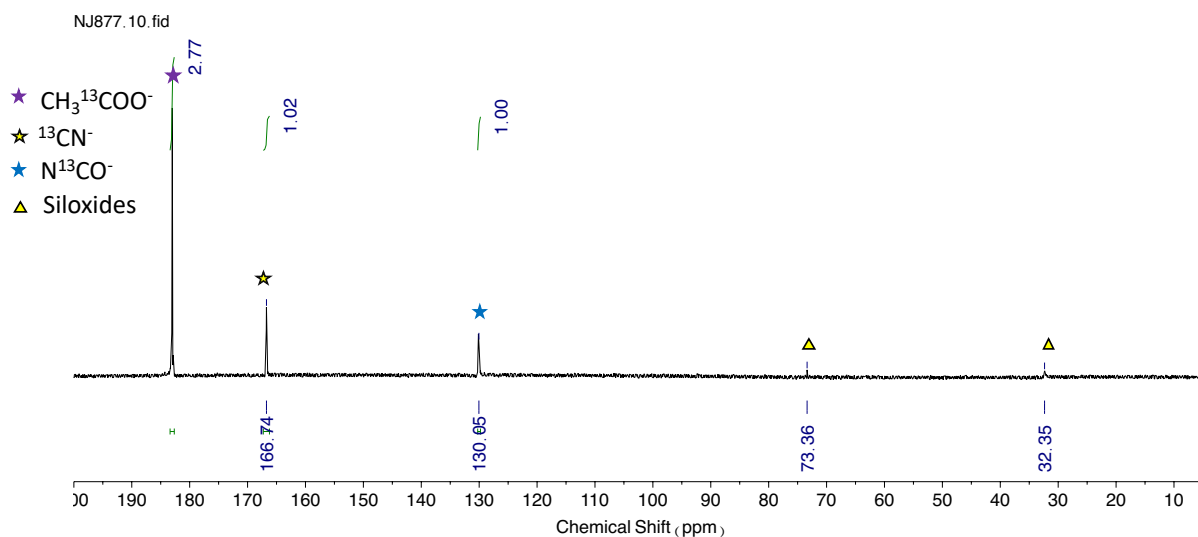

**Figure S49:**  $^{13}\text{C}$  NMR spectrum (151 MHz,  $\text{D}_2\text{O}$ , 298 K) after hydrolysis with  $\text{pD}=13$   $\text{D}_2\text{O}$  of the reaction mixture of complex  $\text{Cs}_4\text{-(N)}_2$  24 hs after addition of 5 equiv. of  $^{13}\text{C}\text{O}$  at 233 K.

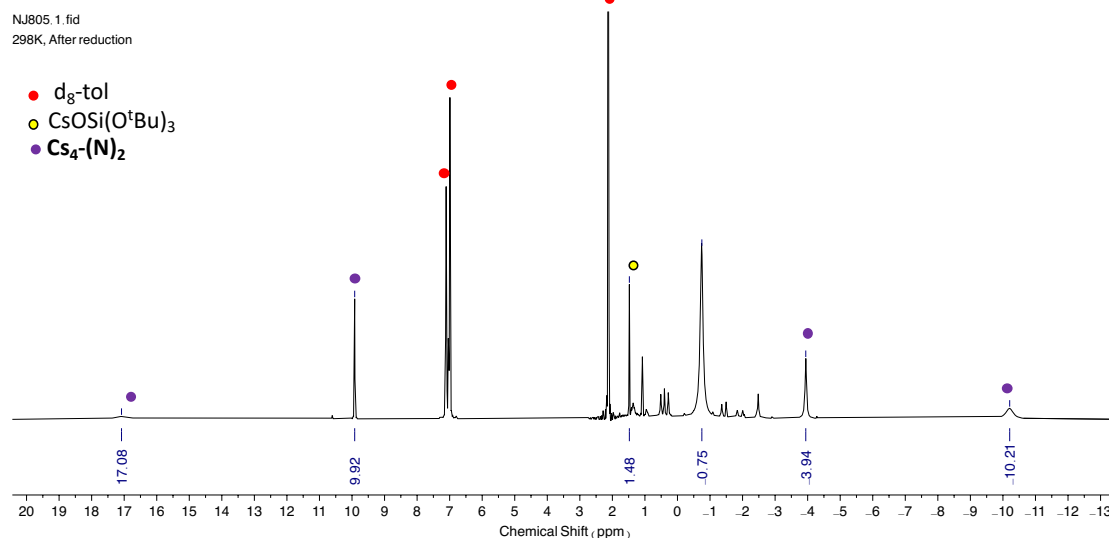

**Figure S50:**  $^1\text{H}$  NMR spectrum (400 MHz,  $d_8$ -toluene, 298 K) of the reaction mixture obtained after addition of 4 equiv. of  $\text{CsC}_8$  to complex **1** after 24 hs at 233 K under a  $\text{N}_2$  atmosphere.

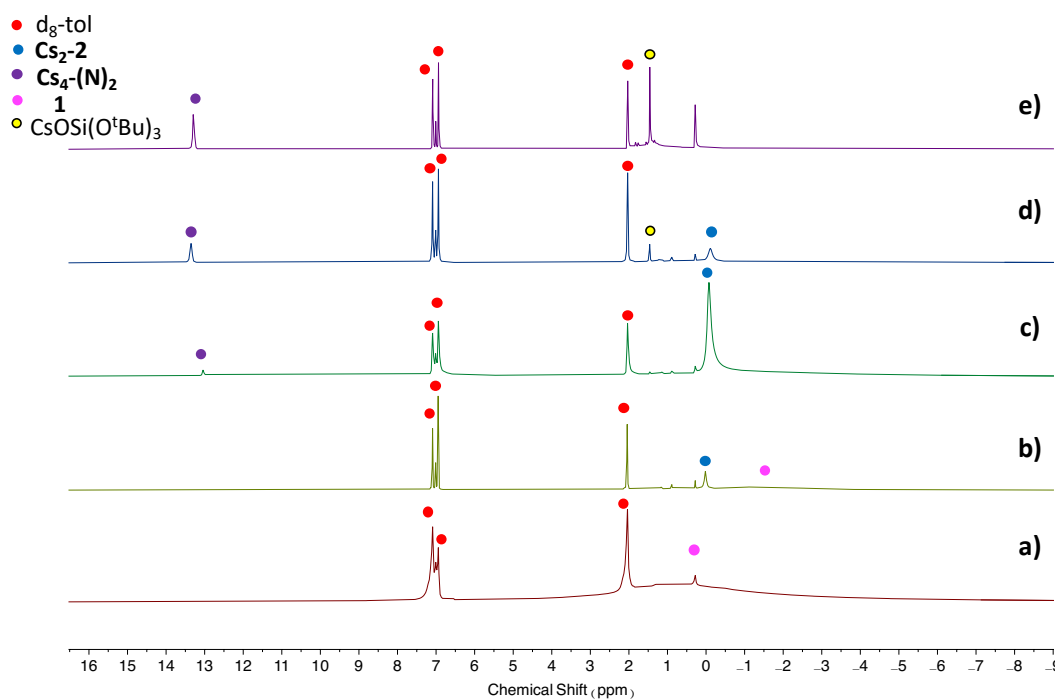

**Figure S51:**  $^1\text{H}$  NMR spectrum (400 MHz,  $d_8$ -toluene, 233 K) evolution of the reaction mixture obtained by addition of 4 equiv. of  $\text{CsC}_8$  to complex **1** at 233 K under a  $\text{N}_2$  atmosphere a) before b) immediately after, c) 1 h after c) 3 hs after d) 15 hs after, e) 24 hs after.

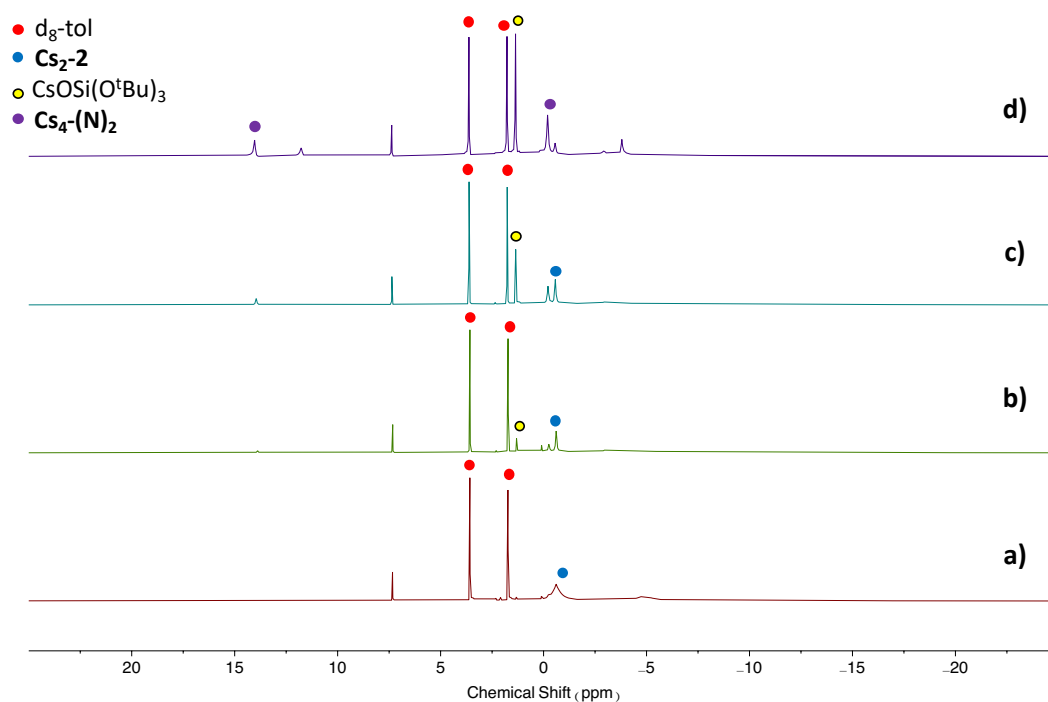

**Figure S52:**  $^1\text{H}$  NMR spectrum (400 MHz,  $d_8$ -THF, 233 K) evolution of the reaction mixture obtained by addition of 2 equiv. of  $\text{CsC}_8$  to complex **Cs<sub>2</sub>-2** in  $d_8$ -THF at 233 K under a  $\text{N}_2$  atmosphere a) before b) immediately after, c) 3 hs after c) 20 hs after.

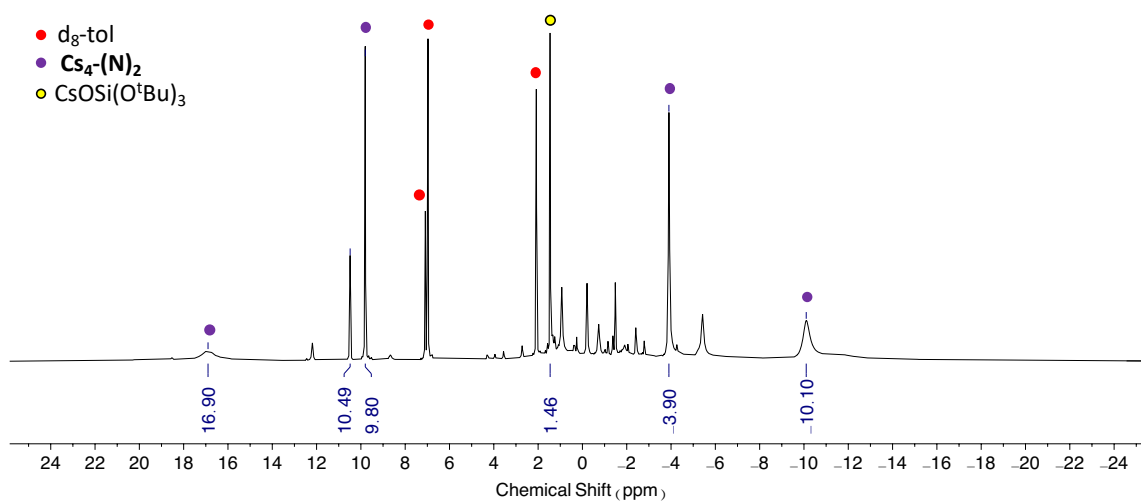

**Figure S53:**  $^1H$  NMR spectrum (400 MHz,  $d_8$ -toluene, 298 K) of the reaction mixture obtained after addition of 2 equiv. of  $CsC_8$  to complex  $Cs_2-2$  in  $d_8$ -THF after 20 hs at 233 K under a  $N_2$  atmosphere.

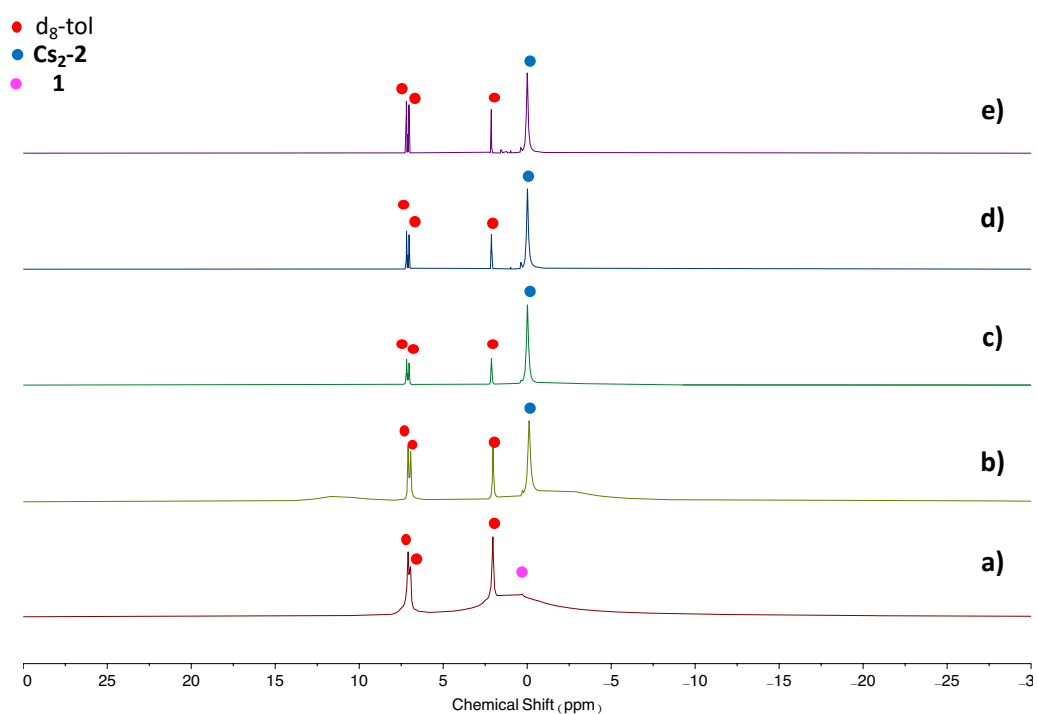

**Figure S54:**  $^1H$  NMR spectrum (400 MHz,  $d_8$ -toluene, 233 K) evolution of the reaction mixture obtained by addition of 4 equiv. of  $CsC_8$  to complex **1** at 233 K under an Ar atmosphere a) before b) immediately after, c) 1 h after c) 3 hs after d) 18 hs after, e) 48 hs after.

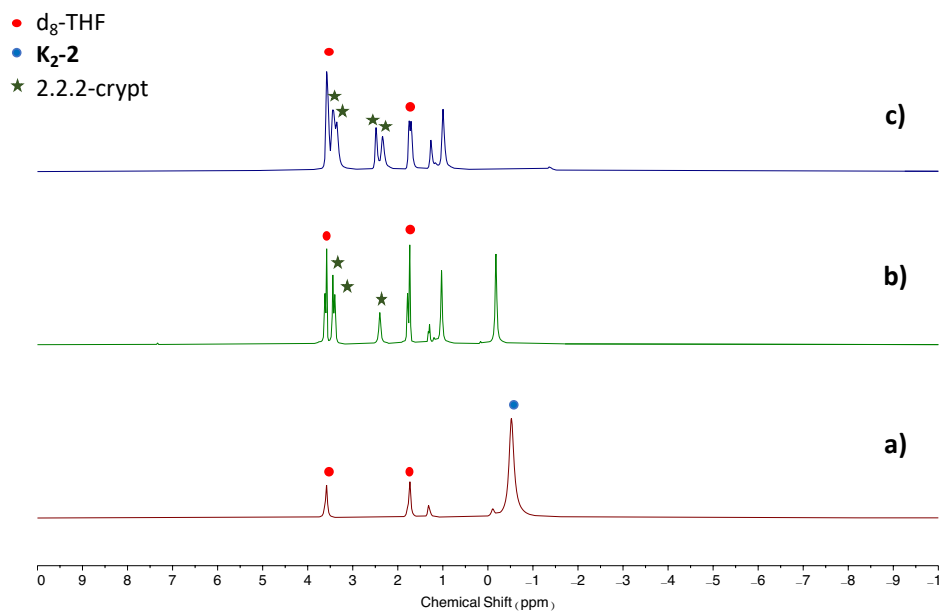

**Figure S55:**  $^1\text{H}$  NMR spectrum (400 MHz,  $d_8$ -THF, 233 K) evolution of the reaction mixture of complex  $K_2-2$  a) before b) after addition of 1 equiv., c) after addition of 2 equiv. of 2.2.2-cryptand at 233 K under an Ar atmosphere.

## X-ray crystallography

Suitable crystals were selected and mounted on various Rigaku diffractometers (XtaLAB Synergy R, DW system, HyPix-Arc 150 detector or SuperNova, Dual, Cu at home/near, AtlasS type detectors). The crystals were kept at a steady  $T = 140.00(10)$  K during data collection. Data were measured using  $w$  scans with Cu  $K_\alpha$  radiation. The diffraction patterns were indexed and the total number of runs and images were based on the strategy calculation from the program CrysAlisPro 1.171.41.118a.<sup>6</sup> The unit cells were refined using CrysAlisPro 1.171.41.118a.<sup>6</sup> Data reduction, scaling and absorption corrections were performed using CrysAlisPro 1.171.41.118a.<sup>6</sup>

The structures were solved with the **ShelXT**<sup>7</sup> solution program using dual methods and by using **Olex2** 1.5<sup>8</sup> as the graphical interface. The models were refined with **ShelXL** 2018/3<sup>9</sup> using full matrix least squares minimisation on  $F^2$ . All non-hydrogen atoms were refined anisotropically. Some hydrogen atom positions were calculated geometrically and refined using the riding model, but most hydrogen atoms were refined freely. Crystallographic and refinement data are summarized in tables S3-S5. The CCDC numbers 2154518-2154525 for all the compounds contain the supplementary crystallographic data for this paper. These data can be obtained free of charge via [www.ccdc.cam.ac.uk/data\\_request/cif](http://www.ccdc.cam.ac.uk/data_request/cif)

**Table S1.** Mean values of selected bond lengths (Å) and angles (°) in the complexes **1**, **M<sub>2</sub>-2** and **M-3**. All distances are average

| Complex                 | U–U        | U1–(μ-O)   | U2–(μ-O)   | U1–(μ-O)–U2 | M1–(μ-O)  | M2–(μ-O) |
|-------------------------|------------|------------|------------|-------------|-----------|----------|
| <b>1</b>                | 4.2128(9)  | 2.1376(13) | 2.0852(13) | 172.19(8)   | -         | -        |
| <b>Rb-3</b>             | 4.1905(13) | 2.265(7)   | 1.947(18)  | 168.2(9)    | 3.730(16) | -        |
| <b>Na-3</b>             | 3.6659(10) | 2.205(17)  | 22.046(17) | 119.1(8)    |           | -        |
| <b>K<sub>2</sub>-2</b>  | 4.2619(10) | 2.178(3)   | 2.120(3)   | 167(4)      | 2.913(4)  | 3.392(4) |
| <b>Rb<sub>2</sub>-2</b> | 4.1972(8)  | 2.135(5)   | 2.100(5)   | 164.7(3)    | 3.007(6)  | 3.696(6) |
| <b>Cs<sub>2</sub>-2</b> | 4.2467(10) | 2.128(6)   | 2.119(6)   | 178.4(4)    | 3.352(8)  | 3.433(8) |

**Table S2.** Mean values of selected bond lengths (Å) and angles (°) in the complexes **M<sub>2</sub>-N<sub>2</sub>**. All distances are average

| Complex                             | U–U       | U1–(μ-O) | U2–(μ-O) | U1–(μ-O)–U2 | U–N      | N–N     |
|-------------------------------------|-----------|----------|----------|-------------|----------|---------|
| <b>Rb<sub>2</sub>-N<sub>2</sub></b> | 3.409(2)  | 2.16(2)  | 2.19(3)  | 104(1)      | 2.20(5)  | 1.41(1) |
| <b>K<sub>2</sub>-N<sub>2</sub></b>  | 3.3801(5) | 2.127(8) | 2.14(1)  | 105.0(3)    | 2.279(8) | 1.40(1) |

In the case of **Rb<sub>2</sub>-N<sub>2</sub>**, each of the bridging hydrazido and oxo ligands are disordered over two positions found in a difference Fourier map and refined anisotropically

The solid-state molecular structure of **Cs<sub>4</sub>-(N)<sub>2</sub>** shows the presence of two independent dimers in the unit cell.

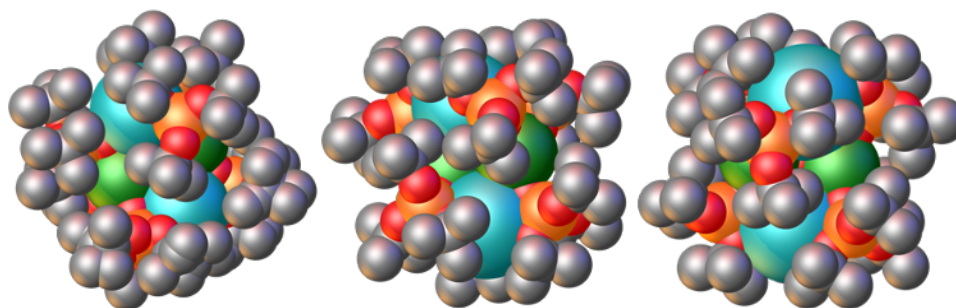

**Figure S56:** Space filling for the solid-state molecular structures of **K<sub>2</sub>-2** (left), **Rb<sub>2</sub>-2** (center) and **Cs<sub>2</sub>-2** (right)

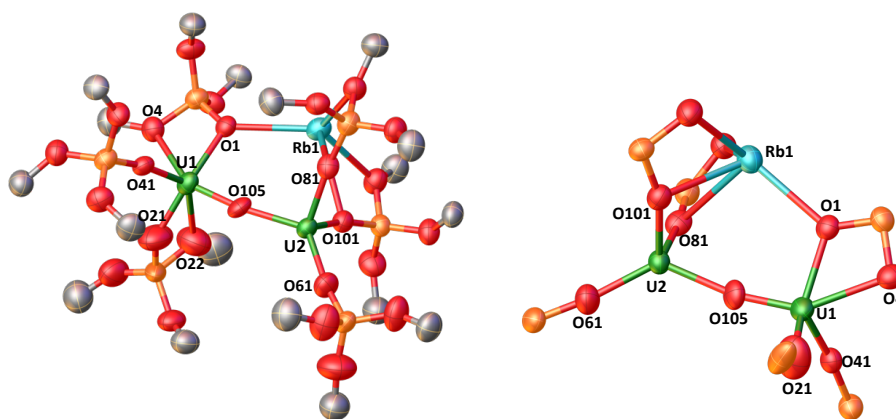

**Figure S57:** Solid-state molecular structure of  $\text{Rb}[\{\text{U}^{\text{III}}(\text{OSi}(\text{O}^t\text{Bu}))_3\}(\mu\text{-O})\{\text{U}^{\text{IV}}(\text{OSi}(\text{O}^t\text{Bu}))_3\}]$  (50% probability ellipsoids). Color code: Uranium (green), rubidium (light blue), oxygen (red), carbon (grey), silicon (orange). Hydrogen atoms and  $t\text{Bu}$  groups were omitted for clarity. Selected bond distances and angles:  $\text{U1-O1-U2}$ :  $119.1(8)^\circ$ ,  $\text{U1-O1}$ :  $2.205(17) \text{ \AA}$ ,  $\text{U2-O1}$ :  $2.046(17) \text{ \AA}$

The solid-state molecular structure of  $\text{Rb}[\{\text{U}^{\text{III}}(\text{OSi}(\text{O}^t\text{Bu}))_3\}(\mu\text{-O})\{\text{U}^{\text{IV}}(\text{OSi}(\text{O}^t\text{Bu}))_3\}]$ , **Rb-3** shows a dimeric U(III)/U(IV) complex with a bridging oxo ligand. U1 is hexa-coordinated in a pseudo octahedral environment, while U2 is tetra-coordinated in a distorted tetrahedral environment by the  $\mu\text{-oxo}$  and completed by the oxygen atoms from the ancillary ligands. The two  $\text{U}-(\mu\text{-O})$  distances are different ( $\text{U1-O105} = 1.947(18) \text{ \AA}$  and  $\text{U2-O105} = 2.265(7) \text{ \AA}$ ) one from the other, suggesting the presence of a localized charge in the uranium centers. The complex shows a slightly bent  $\text{U-O-U}$  motif with an angle ( $168.2(9)^\circ$ ) comparable to those found in both **K<sub>2</sub>-2** ( $167.4(2)^\circ$ ) and **Rb<sub>2</sub>-2** ( $163.1(5)^\circ$ ). The  $\text{Rb}^+$  cation is not bound to the bridging oxo ( $\text{Rb1-O105} = 3.730(16) \text{ \AA}$ ) and it is penta-coordinated only by 5 oxygen atoms from the siloxide groups.

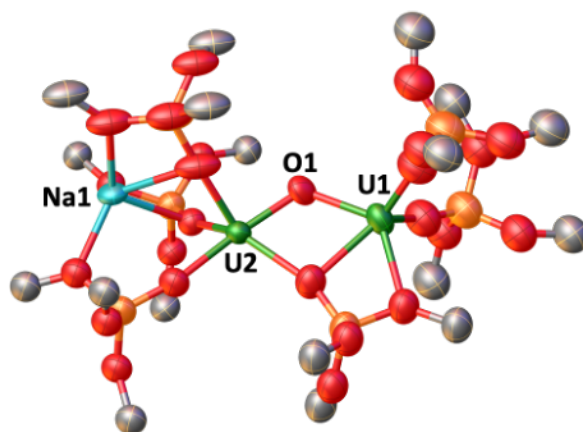

**Figure S58:** Solid-state molecular structure of **Na-3** (50% probability ellipsoids). Color code: uranium (green), sodium (light blue), oxygen (red), carbon (grey), silicon (orange). Hydrogen atoms and  $t\text{Bu}$  groups were omitted for clarity. Selected bond distances and angles:  $\text{U1-O1-U2}$ :  $119.1(8)^\circ$ ,  $\text{U1-O1}$ :  $2.205(17) \text{ \AA}$ ,  $\text{U2-O1}$ :  $2.046(17) \text{ \AA}$

The solid-state molecular structure of  $[\text{Na}\{\text{U}^{\text{III}}(\text{OSi}(\text{O}^t\text{Bu}))_3\}(\mu\text{-O})\{\text{U}^{\text{IV}}(\text{OSi}(\text{O}^t\text{Bu}))_3\}]$ , complex **Na-3** shows a dimeric U(III)/U(IV) complex, the two U centers are bridged not only by an oxo group, but also by an oxygen atom from one of the siloxide ancillary ligands. U1 is hexa-coordinated in a pseudo octahedral environment, while U2 is penta-coordinated in a distorted square pyramidal environment ( $\tau_5 = 0.238$ ) by the  $\mu\text{-oxo}$  and completed by the oxygen atoms from the ancillary ligands. The two  $\text{U}-(\mu\text{-O})$  distances are different ( $\text{U1-O1A} = 2.065(7) \text{ \AA}$  and  $\text{U2-O1A} = 2.214(8) \text{ \AA}$ ) one from the other, suggesting the presence of a localized charge in the uranium centers. The complex shows a highly bent  $\text{U-O-U}$  motif with an angle ( $119.0(3)^\circ$ ) when comparable to those found in **K<sub>2</sub>-2** ( $167.4(2)^\circ$ ), **Rb<sub>2</sub>-2** ( $163.1(5)^\circ$ ) and its Rb analogue ( $168.2(9)^\circ$ ).

Moreover, the complex shows that the two U centres, the oxo and siloxide-oxygen atoms are on a plane, while most of the other oxygen atoms are out of the plane

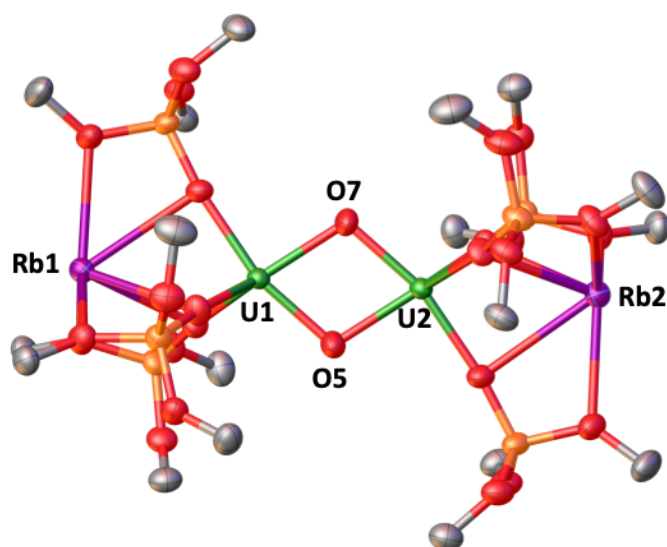

**Figure S59:** Solid-state molecular structure of  $[\text{Rb}_2\{\text{U}^{\text{IV}}(\text{OSi}(\text{O}^t\text{Bu})_3)_2\}(\mu\text{-O})_2]$  (50% probability ellipsoids). Color cod: uranium (green), rubidium (purple), oxygen (red), carbon (grey), silicon (orange). Hydrogen atoms and  $t\text{Bu}$  groups were omitted for clarity.

The solid-state molecular structure of **Rb<sub>2</sub>-4** shows a dimeric U(IV) complex in which each U center is pentacoordinated in a distorted square pyramidal environment by three oxygen atoms of the siloxide ancillary ligands and two bridging oxo. The  $\text{Rb}^+$  cations are coordinated inside the pockets formed by the siloxide ligands. The two U(IV) centers are held in close proximity at a U-U distance of 3.41805(6) Å. The bridging oxo ligands are disordered over two positions each. The mean U-O-U angle is of 105.0(9) and compares well with the K analogue (106.16 (1) $^\circ$ ).<sup>3</sup> Only two oxo atoms are shown for clarity. The methyl groups of the ligands are omitted for clarity.

The U-O distances of 2.11(2) Å and 2.200(9) are comparable to those reported in the analogous **K<sub>2</sub>-4**<sup>3</sup> (2.092(5) and 2.182(5) Å) U(IV) and other bis-oxo diuranium complexes<sup>10</sup>

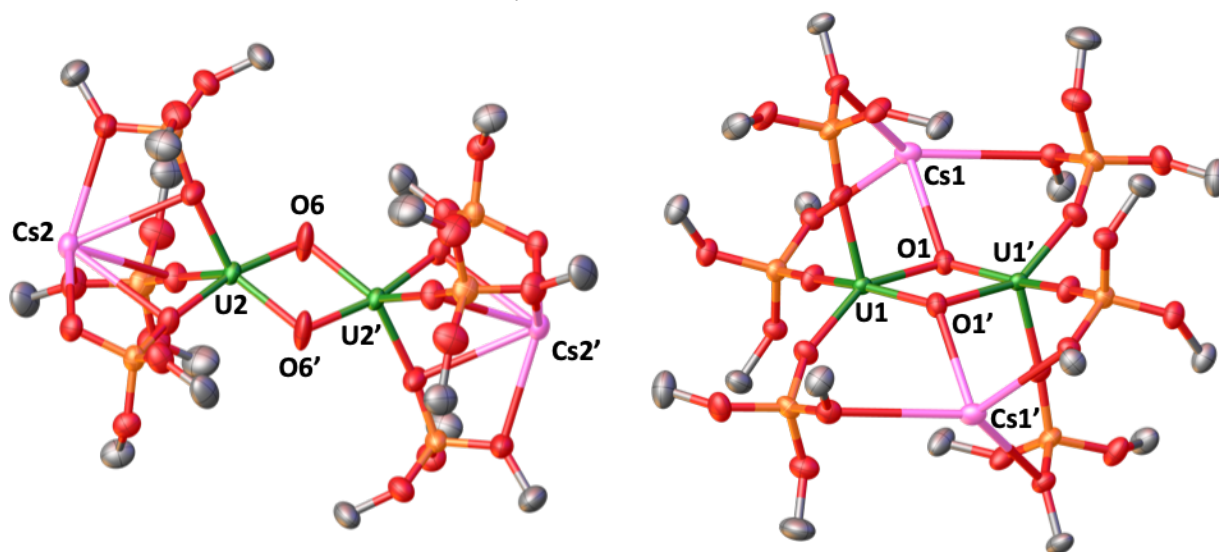

**Figure S60:** Solid-state molecular structure of  $[\text{Cs}_2\{\text{U}^{\text{IV}}(\text{OSi}(\text{O}^t\text{Bu})_3)_2\}(\mu\text{-O})_2]$ , **Cs<sub>2</sub>-4** (50% probability ellipsoids) with the  $\text{Cs}^+$  coordinated by the pockets formed by the siloxide ligands (left) or to the bridging oxo moieties (right) Color cod: uranium (green), cesium (pink), oxygen (red), carbon (grey), silicon (orange). Hydrogen atoms and  $t\text{Bu}$  groups were omitted for clarity.

The solid-state molecular structure of **Cs<sub>2</sub>-4** shows two dimeric U(IV) complexes in which each U center is pentacoordinated in a distorted square pyramidal environment by three oxygen atoms of the siloxide ancillary ligands and two bridging oxo. The  $\text{Cs}^+$  cations are coordinated inside the pockets formed by the siloxide ligands in the isomer on the left of Figure S63, but coordinated to three oxygen atoms of the siloxide ancillary ligands and one of the bridging oxo. The two U(IV) centers are held in close proximity at a U-U distance of 3.48(3) Å. The bridging oxo ligands in the isomer on the left are disordered over two positions each, as was also observed for the analogue **K<sub>2</sub>-4**. The mean U-O-U angle is of 108.0(4) $^\circ$  and compares well with the K analogue (106.16 (1) $^\circ$ ).<sup>3</sup> Only two oxo atoms are shown for clarity.

The U-O distances of 2.09(3) Å and 2.212(8) are comparable to those reported in the analogous **K<sub>2</sub>-4**<sup>3</sup> (2.092(5) and 2.182(5) Å) U(IV) and other bis-oxo diuranium complexes<sup>10</sup>



**Table S3.** X-ray crystallographic data for **M<sub>2</sub>-2** and **Rb<sub>2</sub>-N<sub>2</sub>**.

| Compound                                        | <b>Cs<sub>2</sub>-2</b>                                                                         | <b>Rb<sub>2</sub>-2 (Hexane)</b>                                                                | <b>Rb<sub>2</sub>-N<sub>2</sub></b>                                                                            |
|-------------------------------------------------|-------------------------------------------------------------------------------------------------|-------------------------------------------------------------------------------------------------|----------------------------------------------------------------------------------------------------------------|
| Formula                                         | C <sub>72</sub> H <sub>162</sub> Cs <sub>2</sub> O <sub>25</sub> Si <sub>6</sub> U <sub>2</sub> | C <sub>78</sub> H <sub>176</sub> O <sub>25</sub> Rb <sub>2</sub> Si <sub>6</sub> U <sub>2</sub> | C <sub>72</sub> H <sub>162</sub> N <sub>2</sub> O <sub>25</sub> Rb <sub>2</sub> Si <sub>6</sub> U <sub>2</sub> |
| Crystal size [mm <sup>3</sup> ]                 | 0.12×0.07×0.03                                                                                  | 0.52×0.44×0.06                                                                                  | 0.198×0.110×0.044                                                                                              |
| Crystal system                                  | Tetragonal                                                                                      | Monoclinic                                                                                      | Triclinic                                                                                                      |
| Space group                                     | I <sub>4</sub> /a                                                                               | P21/n                                                                                           | P1                                                                                                             |
| V [Å <sup>3</sup> ]                             | 42309.8(16)                                                                                     | 11211.2(2)                                                                                      | 5654.0(2)                                                                                                      |
| a [Å]                                           | 25.3833(4)                                                                                      | 14.04416(15)                                                                                    | 14.0149(3)                                                                                                     |
| b [Å]                                           | 25.3833(4)                                                                                      | 29.0153(3)                                                                                      | 17.5229(3)                                                                                                     |
| c [Å]                                           | 65.6666(17)                                                                                     | 27.5170(3)                                                                                      | 24.7263(6)                                                                                                     |
| α [°]                                           | 90                                                                                              | 90                                                                                              | 83.4471(18)                                                                                                    |
| β [°]                                           | 90                                                                                              | 91.0486(9)                                                                                      | 83.4537(19)                                                                                                    |
| γ [°]                                           | 90                                                                                              | 90                                                                                              | 70.099(2)                                                                                                      |
| Z                                               | 16                                                                                              | 4                                                                                               | 2                                                                                                              |
| Absorption coefficient [mm <sup>-1</sup> ]      | 14.977                                                                                          | 10.209                                                                                          | 10.115                                                                                                         |
| F (000)                                         | 18752.0                                                                                         | 4744.0                                                                                          | 2300                                                                                                           |
| T [K]                                           | 140.1(5)                                                                                        | 140.00(10)                                                                                      | 140.00(10)                                                                                                     |
| Total no. reflexions                            | 113244                                                                                          | 57578                                                                                           | 143257                                                                                                         |
| Unique reflexions [R(int)]                      | 18706 [0.1469]                                                                                  | 21687 [0.0449]                                                                                  | 44789 [0.0832]                                                                                                 |
| Final R indice [I>2σ(I)]                        | 0.0556                                                                                          | 0.0555                                                                                          | 0.0608                                                                                                         |
| Largest diff. peak and hole [eÅ <sup>-3</sup> ] | 2.7267<br>and -2.6391                                                                           | 3.154<br>and -1.551                                                                             | 1.945<br>and -2.657                                                                                            |
| Goof                                            | 1.0072                                                                                          | 1.092                                                                                           | 1.048                                                                                                          |
| CCDC number                                     | 2154524                                                                                         | 2154518                                                                                         | 2154522                                                                                                        |

**Table S4.** X-ray crystallographic data for **M-3** and **Cs<sub>4</sub>-(N)<sub>2</sub>**.

| Compound                                        | <b>Rb-3</b>                                                                       | <b>Na-3</b>                                                                       | <b>Cs<sub>4</sub>-(N)<sub>2</sub></b>                                                                            |
|-------------------------------------------------|-----------------------------------------------------------------------------------|-----------------------------------------------------------------------------------|------------------------------------------------------------------------------------------------------------------|
| Formula                                         | C <sub>72</sub> H <sub>162</sub> O <sub>25</sub> RbSi <sub>6</sub> U <sub>2</sub> | C <sub>72</sub> H <sub>162</sub> NaO <sub>25</sub> Si <sub>6</sub> U <sub>2</sub> | C <sub>144</sub> H <sub>324</sub> Cs <sub>8</sub> N <sub>4</sub> O <sub>50</sub> Si <sub>12</sub> U <sub>4</sub> |
| Crystal size [mm <sup>3</sup> ]                 | 0.126×0.076×0.057                                                                 | 0.23×0.09×0.06                                                                    | 0.60×0.08×0.06                                                                                                   |
| Crystal system                                  | Triclinic                                                                         | Monoclinic                                                                        | Triclinic                                                                                                        |
| Space group                                     | P-1                                                                               | P2 <sub>1</sub>                                                                   | P-1                                                                                                              |
| V [Å <sup>3</sup> ]                             | 5114.5(7)                                                                         | 5333.4(2)                                                                         | 11885.2(4)                                                                                                       |
| a [Å]                                           | 13.7997(11)                                                                       | 13.8302(3)                                                                        | 14.2492(3)                                                                                                       |
| b [Å]                                           | 16.5080(11)                                                                       | 31.0949(4)                                                                        | 30.7972(6)                                                                                                       |
| c [Å]                                           | 25.0252(18)                                                                       | 14.0653(4)                                                                        | 30.9557(5)                                                                                                       |
| α [°]                                           | 71.888(6)                                                                         | 90                                                                                | 115.8481(18)                                                                                                     |
| β [°]                                           | 81.133(6)                                                                         | 118.148(3)                                                                        | 95.2709(16)                                                                                                      |
| γ [°]                                           | 71.005(6)                                                                         | 90                                                                                | 98.8528(18)                                                                                                      |
| Z                                               | 2                                                                                 | 2                                                                                 | 2                                                                                                                |
| Absorption coefficient [mm <sup>-1</sup> ]      | 10.590                                                                            | 9.643                                                                             | 18.051                                                                                                           |
| F (000)                                         | 2198                                                                              | 2146.0                                                                            | 5184.0                                                                                                           |
| T [K]                                           | 140.1(5)                                                                          | 140.00(10)                                                                        | 219.99(10)                                                                                                       |
| Total no. reflexions                            | 22172                                                                             | 29907                                                                             | 105668                                                                                                           |
| Unique reflexions [R(int)]                      | 22172                                                                             | 29907                                                                             | 46105 [0.0838]                                                                                                   |
| Final R indice [ I>2σ(I)]                       | 0.0858                                                                            | 0.0809                                                                            | 0.0645                                                                                                           |
| Largest diff. peak and hole [eÅ <sup>-3</sup> ] | 5.654 and -4.529                                                                  | 2.665 and -1.980                                                                  | 2.984 and -2.052                                                                                                 |
| Goof                                            | 0.922                                                                             | 1.052                                                                             | 0.963                                                                                                            |
| CCDC number                                     | 2154521                                                                           | 2154525                                                                           | 2154519                                                                                                          |

**Table S5.** X-ray crystallographic data for **M<sub>2</sub>-4**.

| Compound                                        | <b>Rb<sub>2</sub>-4</b> (Toluene) <sub>2</sub>                                                  | <b>Cs<sub>2</sub>-4</b> (Toluene)                                                               |
|-------------------------------------------------|-------------------------------------------------------------------------------------------------|-------------------------------------------------------------------------------------------------|
| Formula                                         | C <sub>86</sub> H <sub>178</sub> O <sub>26</sub> Rb <sub>2</sub> Si <sub>6</sub> U <sub>2</sub> | C <sub>79</sub> H <sub>170</sub> Cs <sub>2</sub> O <sub>26</sub> Si <sub>6</sub> U <sub>2</sub> |
| Crystal size [mm <sup>3</sup> ]                 | 0.41×0.28×0.27                                                                                  | 0.28×0.14×0.09                                                                                  |
| Crystal system                                  | Triclinic                                                                                       | Triclinic                                                                                       |
| Space group                                     | P-1                                                                                             | P-1                                                                                             |
| V [Å <sup>3</sup> ]                             | 5863.85(18)                                                                                     | 5492.7(3)                                                                                       |
| a [Å]                                           | 14.4840(2)                                                                                      | 14.3992(5)                                                                                      |
| b [Å]                                           | 17.5730(3)                                                                                      | 14.5329(5)                                                                                      |
| c [Å]                                           | 25.4883(4)                                                                                      | 30.7352(7)                                                                                      |
| α [°]                                           | 79.6962(13)                                                                                     | 88.132(2)                                                                                       |
| β [°]                                           | 89.4157(13)                                                                                     | 79.130(2)                                                                                       |
| γ [°]                                           | 67.0260(16)                                                                                     | 60.661(3)                                                                                       |
| Z                                               | 2                                                                                               | 2                                                                                               |
| Absorption coefficient [mm <sup>-1</sup> ]      | 9.795                                                                                           | 3.724                                                                                           |
| F (000)                                         | 2488.0                                                                                          | 2460.0                                                                                          |
| T [K]                                           | 140.0(1)                                                                                        | 140.0(3)                                                                                        |
| Total no. reflexions                            | 68433                                                                                           | 53255                                                                                           |
| Unique reflexions [R(int)]                      | 23858 [0.0269]                                                                                  | 19362 [0.0317]                                                                                  |
| Final R indice [ $I > 2\sigma(I)$ ]             | 0.0391                                                                                          | 0.0542                                                                                          |
| Largest diff. peak and hole [eÅ <sup>-3</sup> ] | 3.019<br>and -2.322                                                                             | 1.276<br>and -1.3235                                                                            |
| Goof                                            | 1.060                                                                                           | 1.190                                                                                           |
| CCDC number                                     | 2154523                                                                                         | 2154520                                                                                         |

## SQUID magnetometry

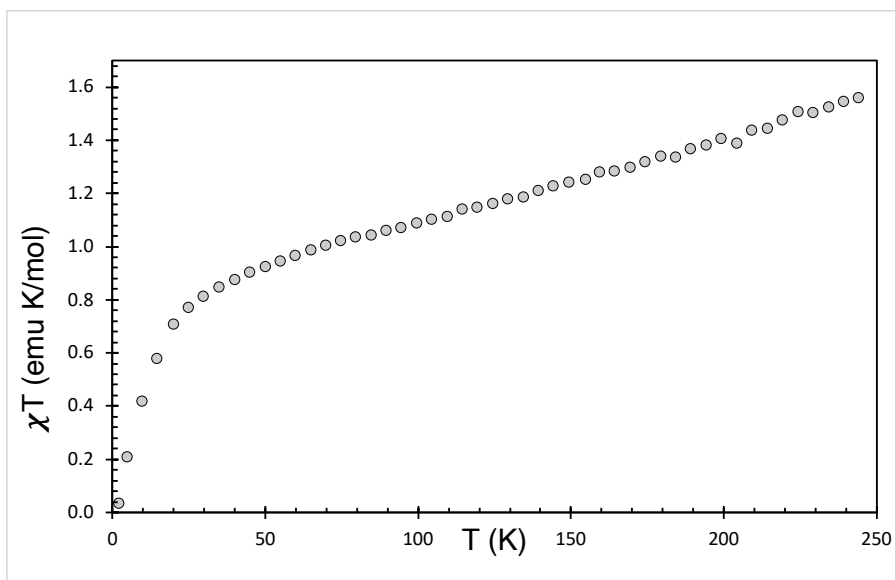

Figure S61: Plot of  $\chi T$  per complex versus temperature data for  $\text{Cs}_2\text{-2}$  under an applied field of 1 T

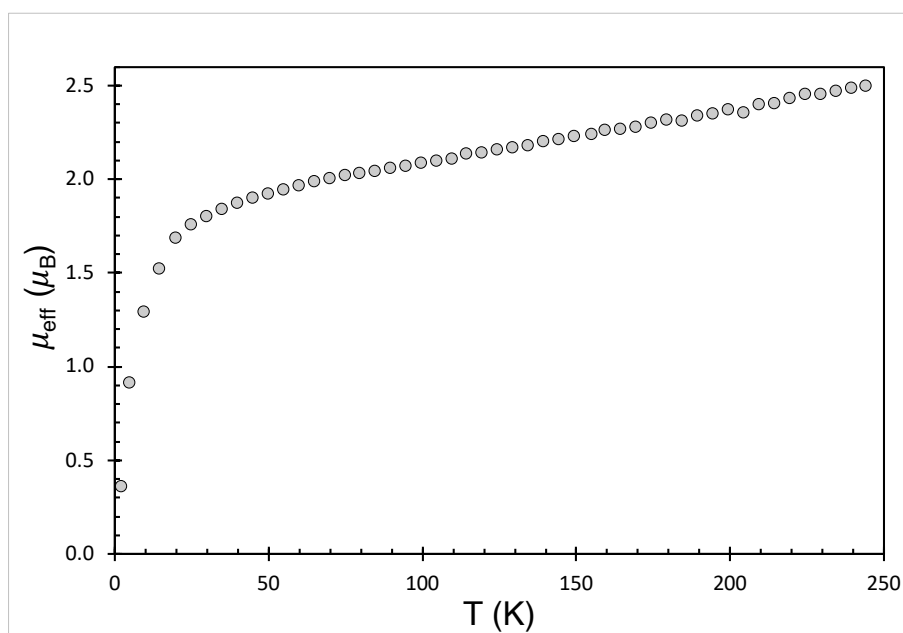

Figure S62: Plot of  $\mu_{\text{eff}}$  per ion versus  $T$  data for  $\text{Cs}_2\text{-2}$  under an applied field of 1 T

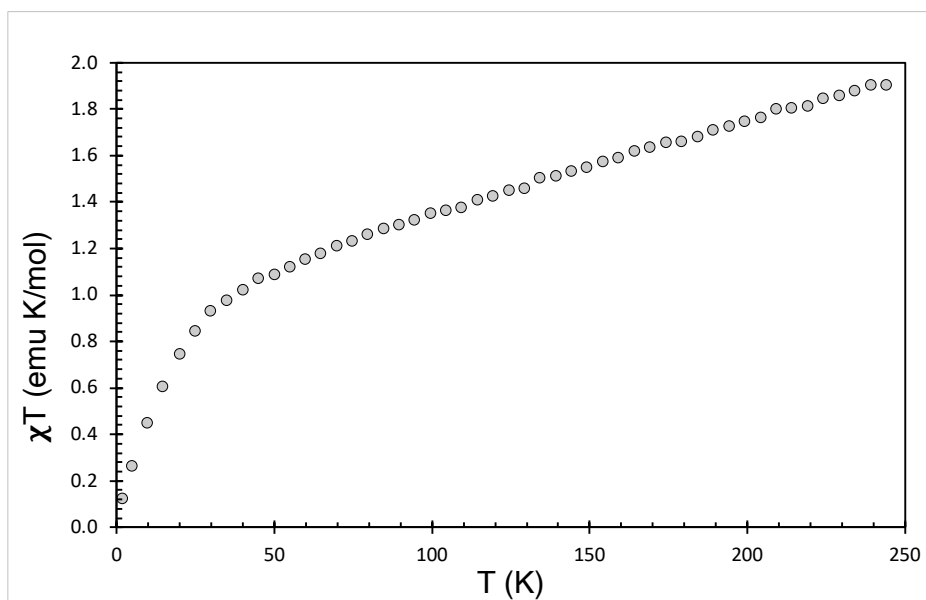

Figure S63: Plot of  $\chi T$  per complex versus temperature data for **Rb<sub>2</sub>-2** under an applied field of 1 T

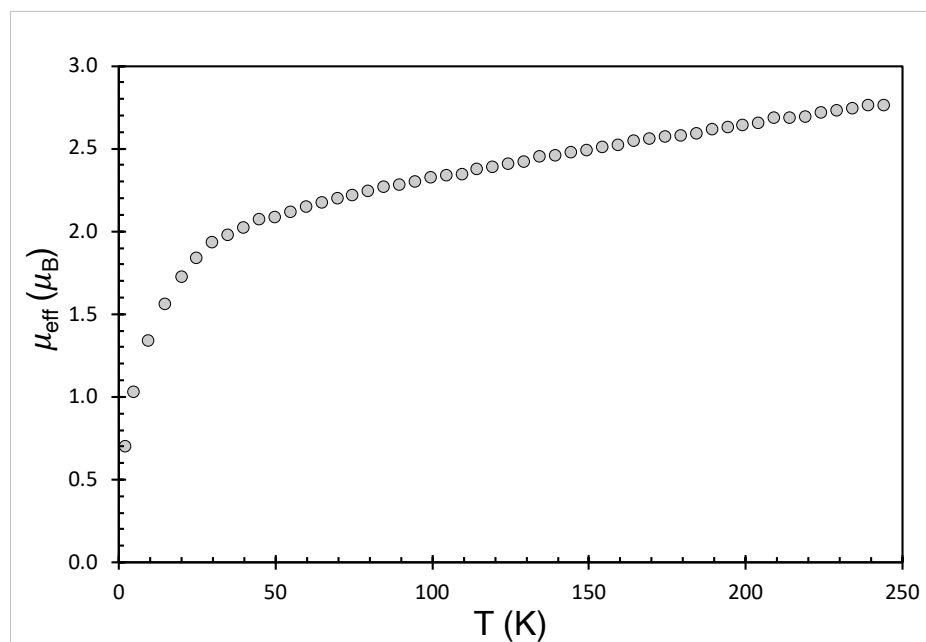

Figure S64: Plot of  $\mu_{\text{eff}}$  per ion versus  $T$  data for **Rb<sub>2</sub>-2** under an applied field of 1 T

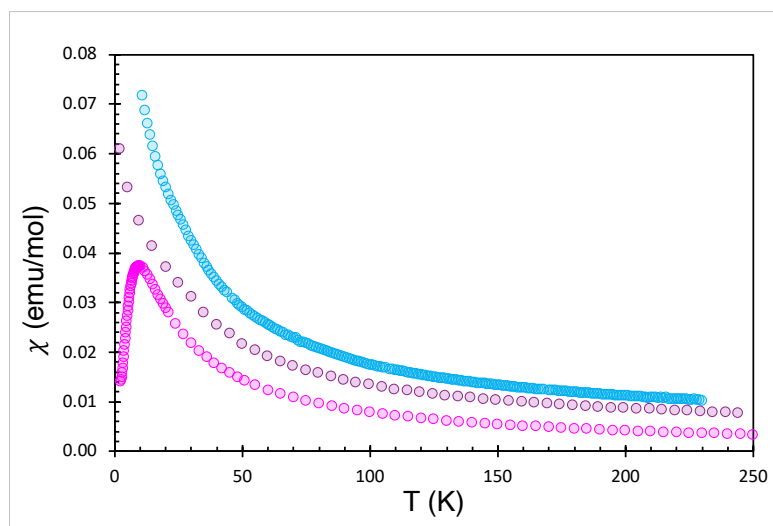

**Figure S65:** Plot of measured  $\chi$  (per complex) versus temperature data for  $\text{K}_2\text{-2}$  (light blue) (redrawn from <sup>3</sup>),  $\text{Rb}_2\text{-2}$  (purple) and  $\text{Cs}_2\text{-2}$  (pink) under an applied field of 1 T

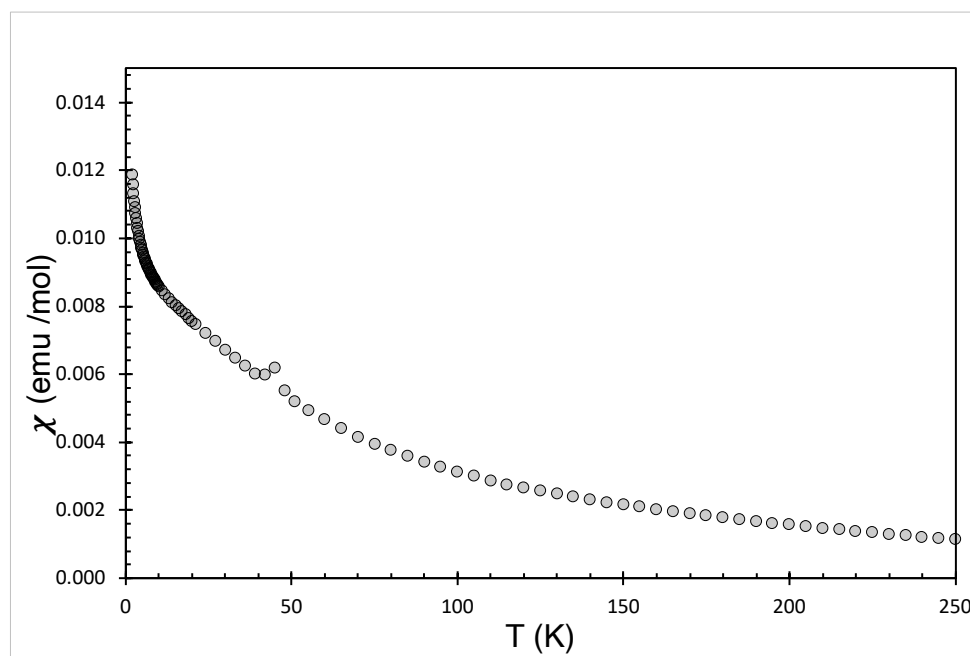

**Figure S66:** Plot of  $\chi$  per complex versus temperature data for  $\text{Cs}_4\text{-(N)}_2$  under an applied field of 1 T

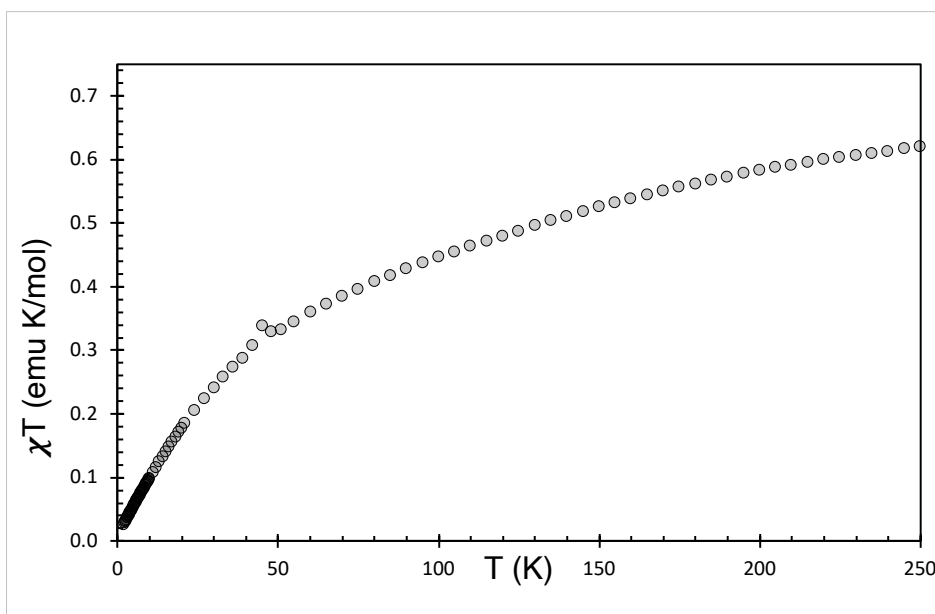

Figure S67: Plot of  $\chi T$  per complex versus temperature data for  $\text{Cs}_4\text{-(N)}_2$  under an applied field of 1 T

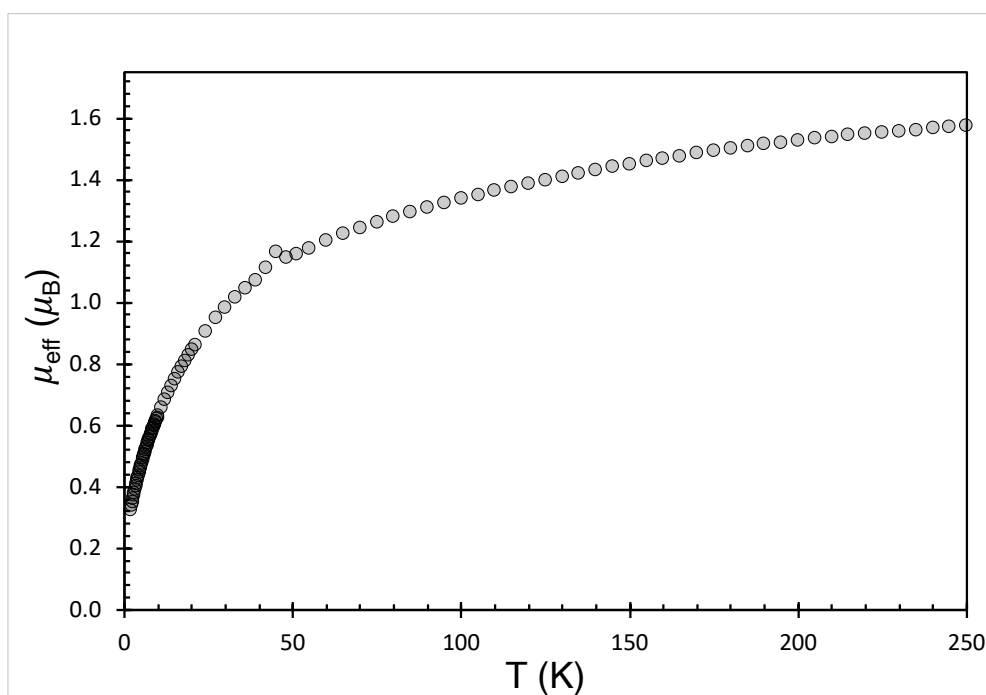

Figure S68: Plot of  $\mu_{\text{eff}}$  per ion versus temperature data for  $\text{Cs}_4\text{-(N)}_2$  under an applied field of 1 T

## Electrochemistry

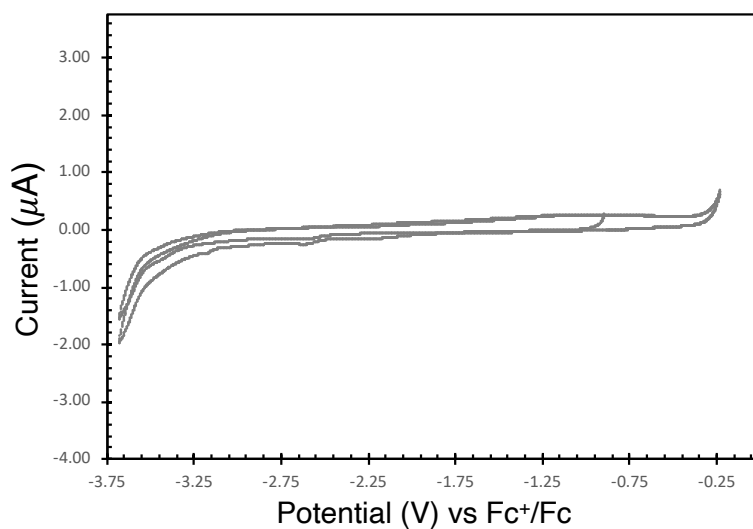

**Figure S69:** Cyclic voltammogram recorded in 0.1 M [NBu<sub>4</sub>][BPh<sub>4</sub>] in THF solution at 25°C in absence of compound (blank), at a scan rate of 100 mV/sec a, referenced against [Fe(C<sub>5</sub>H<sub>5</sub>)<sub>2</sub>]<sup>+</sup>/ [Fe(C<sub>5</sub>H<sub>5</sub>)<sub>2</sub>]

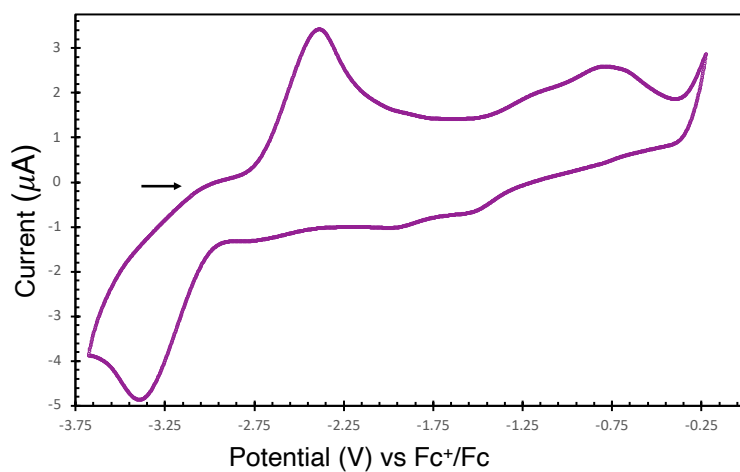

**Figure S70:** Cyclic voltammogram of complex **Rb<sub>2</sub>-2** recorded in 0.1 M [NBu<sub>4</sub>][BPh<sub>4</sub>] in 3.0 mM THF solution at 25°C, at a scan rate of 100 mV/sec a, referenced against [Fe(C<sub>5</sub>H<sub>5</sub>)<sub>2</sub>]<sup>+</sup>/ [Fe(C<sub>5</sub>H<sub>5</sub>)<sub>2</sub>]



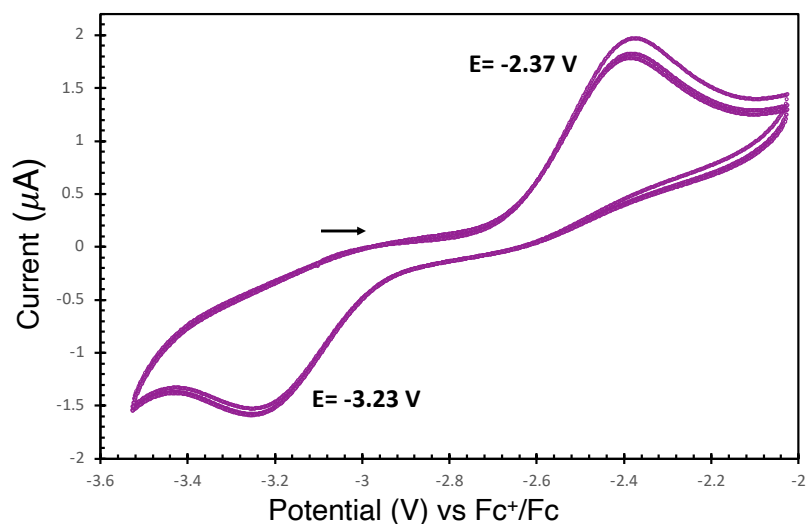

**Figure S71:** Reduction region of cyclic voltammogram of complex **Rb<sub>2</sub>-2** recorded in 0.1 M [NBu<sub>4</sub>][BPh<sub>4</sub>] in 3.0 mM THF solution at 25°C, at a scan rate of 100 mV/sec a, referenced against [Fe(C<sub>5</sub>H<sub>5</sub>)<sub>2</sub>]<sup>+</sup>/ [Fe(C<sub>5</sub>H<sub>5</sub>)<sub>2</sub>]

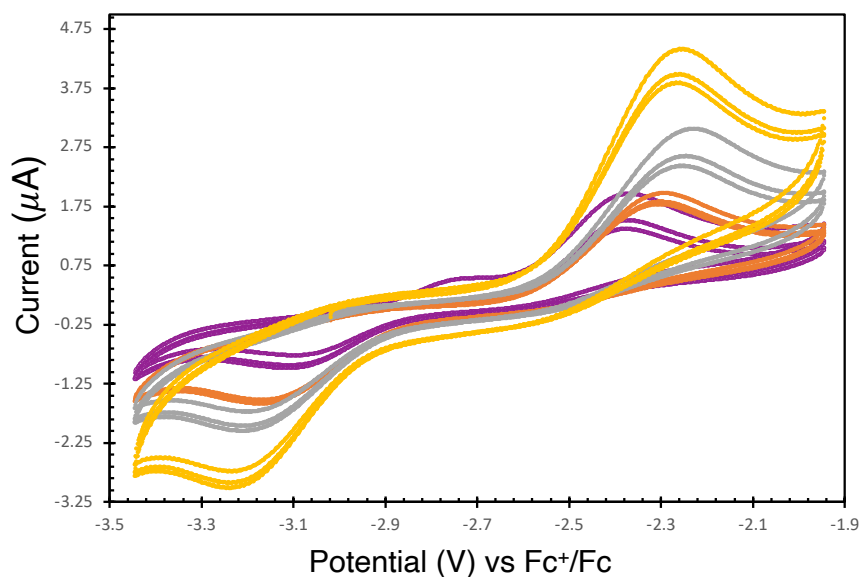

**Figure S72:** Reduction region of cyclic voltammogram of complex **Rb<sub>2</sub>-2** recorded in 0.1 M [NBu<sub>4</sub>][BPh<sub>4</sub>] in 3.0 mM THF solution at 25°C, at different scan rates (purple: 50 mV/sec, orange: 100 mV/sec, grey: 200 mV/sec, yellow: 500 mV/sec), referenced against [Fe(C<sub>5</sub>H<sub>5</sub>)<sub>2</sub>]<sup>+</sup>/ [Fe(C<sub>5</sub>H<sub>5</sub>)<sub>2</sub>]

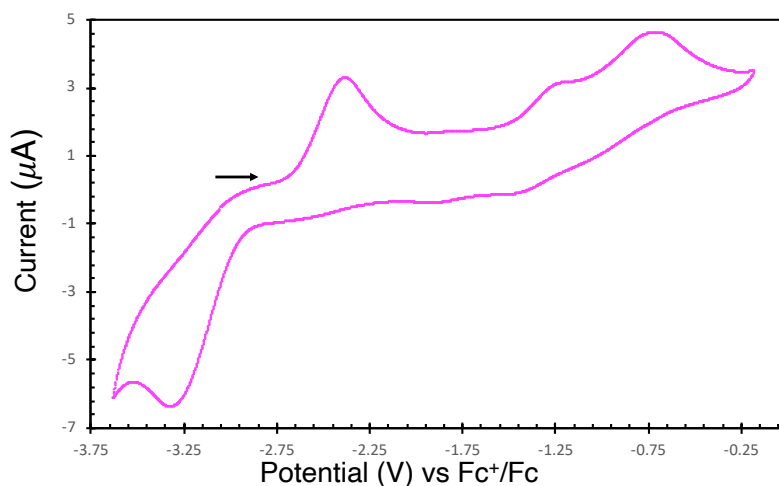

**Figure S73:** Cyclic voltammogram of complex **Cs<sub>2</sub>-2** recorded in 0.1 M [NBu<sub>4</sub>][BPh<sub>4</sub>] in 3.5 mM THF solution at 25°C, at a scan rate of 100 mV/sec, referenced against [Fe(C<sub>5</sub>H<sub>5</sub>)<sub>2</sub>]<sup>+</sup>/ [Fe(C<sub>5</sub>H<sub>5</sub>)<sub>2</sub>]

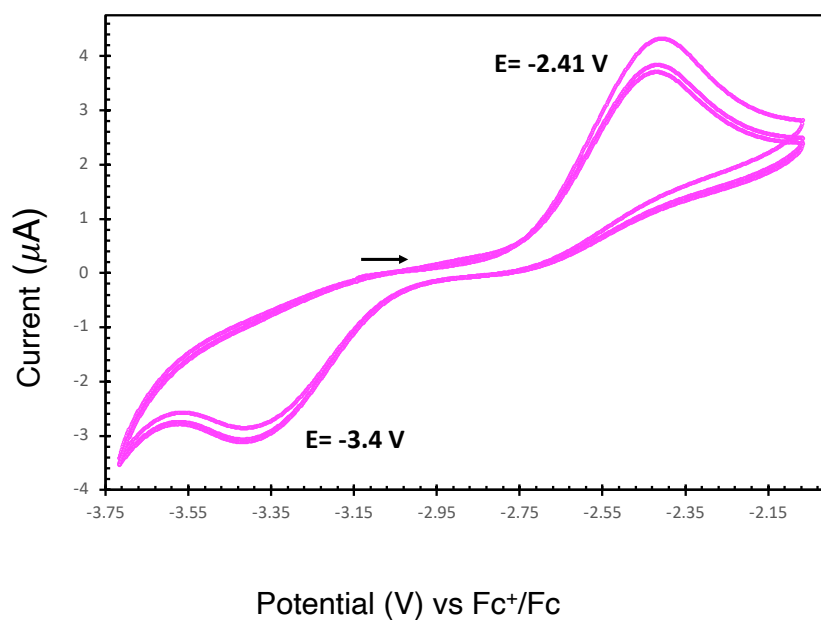

**Figure S74:** Reduction region of cyclic voltammogram of complex **Cs<sub>2</sub>-2** recorded in 0.1 M [NBu<sub>4</sub>][BPh<sub>4</sub>] in 3.5 mM THF solution at 25°C, at a scan rate of 100 mV/sec a, referenced against [Fe(C<sub>5</sub>H<sub>5</sub>)<sub>2</sub>]<sup>+</sup>/ [Fe(C<sub>5</sub>H<sub>5</sub>)<sub>2</sub>]

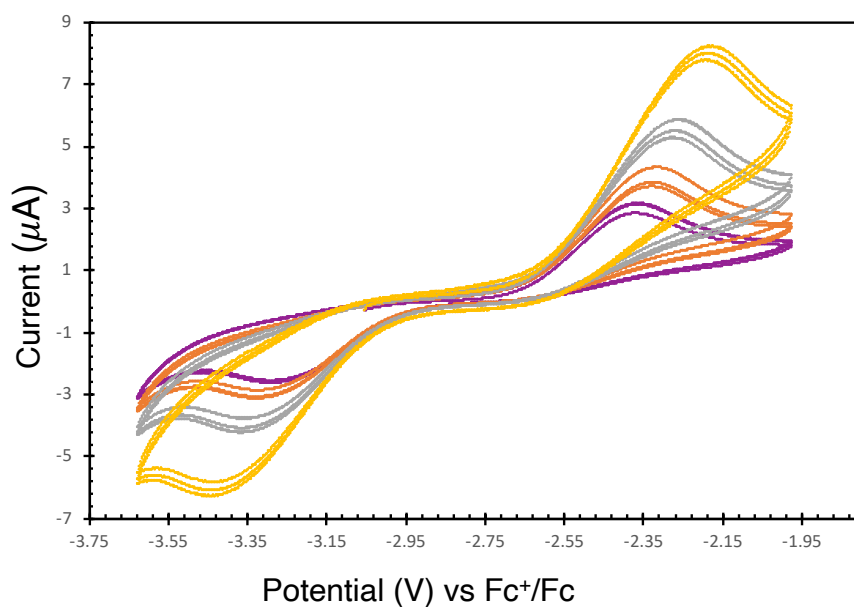

**Figure S75:** Reduction region of cyclic voltammogram of complex **Cs<sub>2</sub>-2** recorded in 0.1 M [NBu<sub>4</sub>][BPh<sub>4</sub>] in 3.5 mM THF solution at 25°C, at different scan rates (purple: 50 mV/sec, orange: 100 mV/sec, grey: 200 mV/sec, yellow: 500 mV/sec), referenced against [Fe(C<sub>5</sub>H<sub>5</sub>)<sub>2</sub>]<sup>+</sup>/ [Fe(C<sub>5</sub>H<sub>5</sub>)<sub>2</sub>]

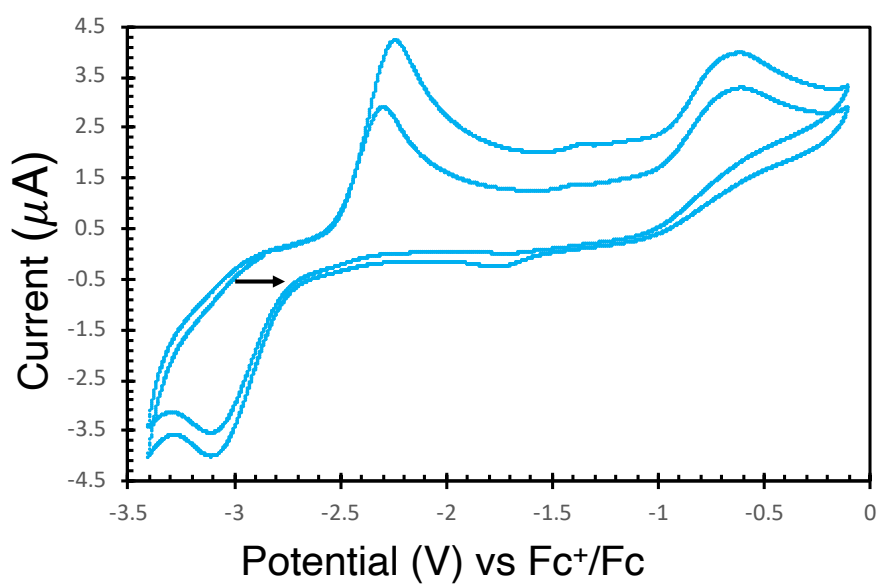

**Figure S76:** Cyclic voltammogram of complex **K<sub>2</sub>-2** recorded in 0.1 M [NBu<sub>4</sub>][BPh<sub>4</sub>] in 3.0 mM THF solution at 25°C, at a scan rate of 100 mV/sec, referenced against [Fe(C<sub>5</sub>H<sub>5</sub>)<sub>2</sub>]<sup>+/0</sup>

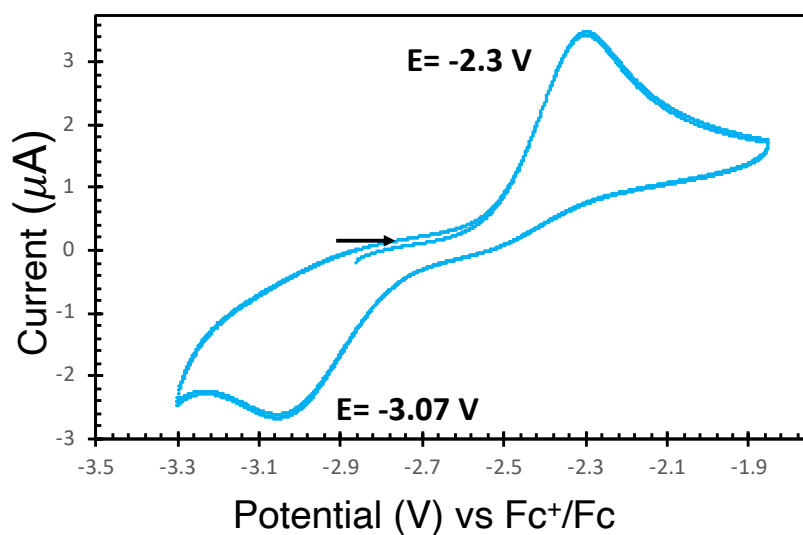

**Figure S77:** Reduction region of cyclic voltammogram of complex  $\text{K}_2\text{-2}$  recorded in 0.1 M  $[\text{NBu}_4][\text{BPh}_4]$  in 3.0 mM THF solution at 25°C, at a scan rate of 100 mV/sec, referenced against  $[\text{Fe}(\text{C}_5\text{H}_5)_2]^{+/0}$

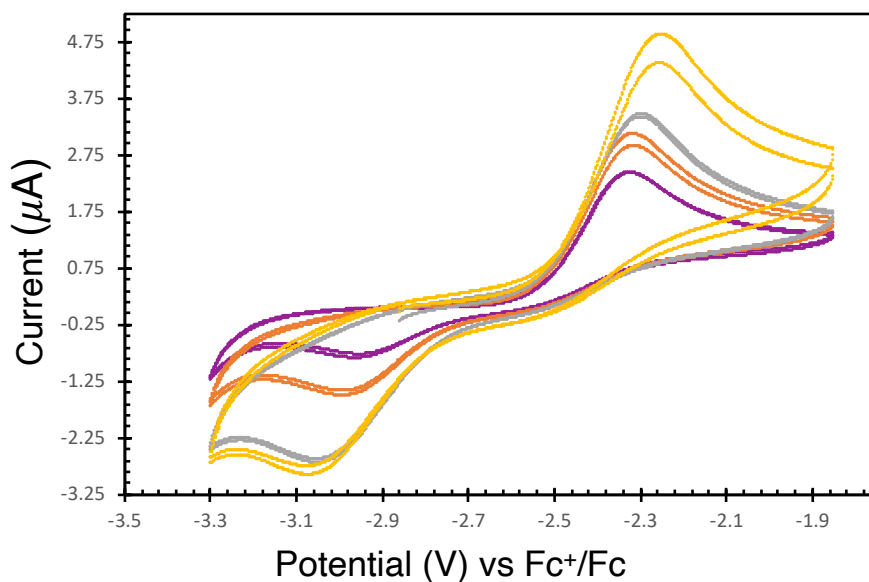

**Figure S78:** Reduction region of cyclic voltammogram of complex  $\text{K}_2\text{-2}$  recorded in 0.1 M  $[\text{NBu}_4][\text{BPh}_4]$  in 3.0 mM THF solution at 25°C, at different scan rates (purple: 50 mV/sec, orange: 75 mV/sec, grey: 100 mV/sec, yellow: 200 mV/sec), referenced against  $[\text{Fe}(\text{C}_5\text{H}_5)_2]^{+/0}$

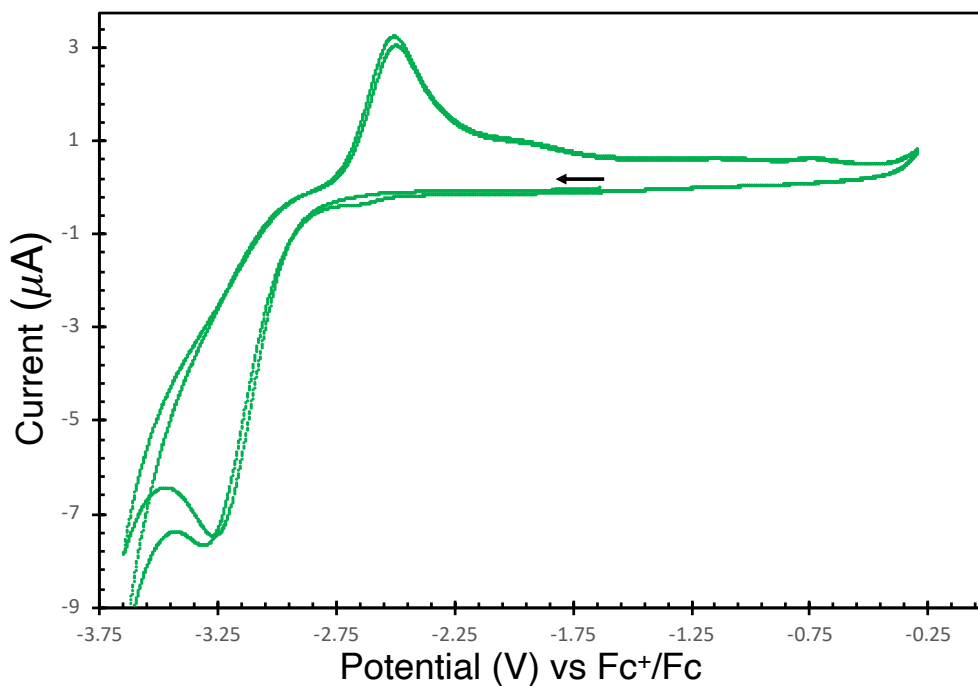

**Figure S79:** Cyclic voltammogram of complex **1** recorded in 0.1 M  $[\text{NBu}_4][\text{BPh}_4]$  in 3.0 mM THF solution at 25°C, at a scan rate of 100 mV/sec, referenced against  $[\text{Fe}(\text{C}_5\text{H}_5)_2]^{+/0}$

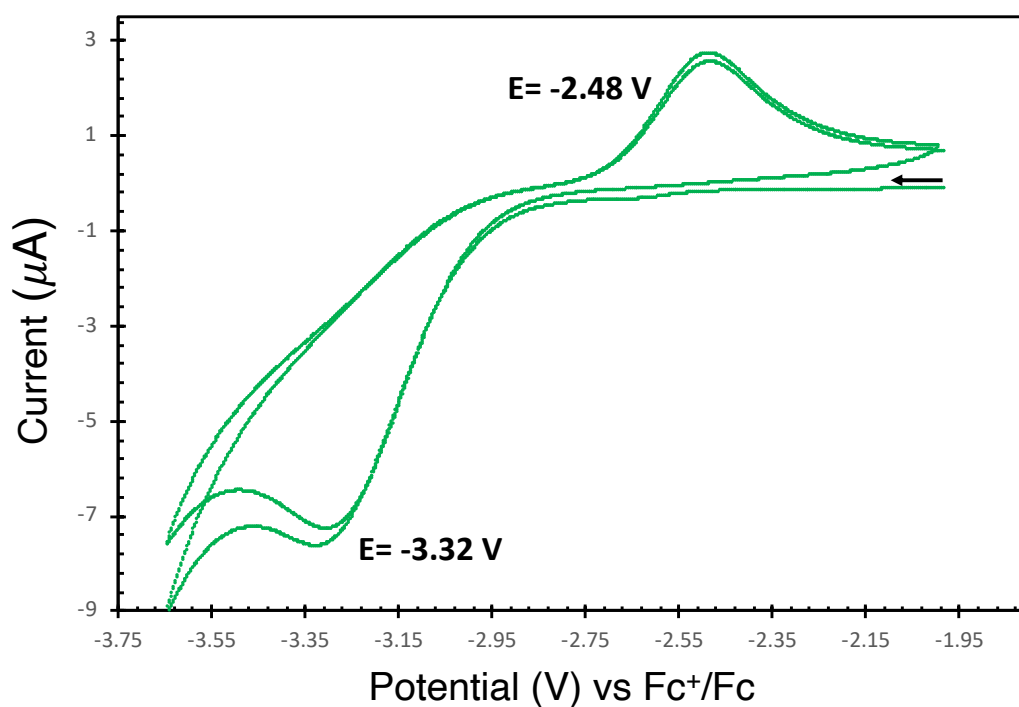

**Figure S80:** Reduction region of cyclic voltammogram of complex **1** recorded in 0.1 M  $[\text{NBu}_4][\text{BPh}_4]$  in 3.0 mM THF solution at 25°C, at a scan rate of 100 mV/sec, referenced against  $[\text{Fe}(\text{C}_5\text{H}_5)_2]^{+/0}$

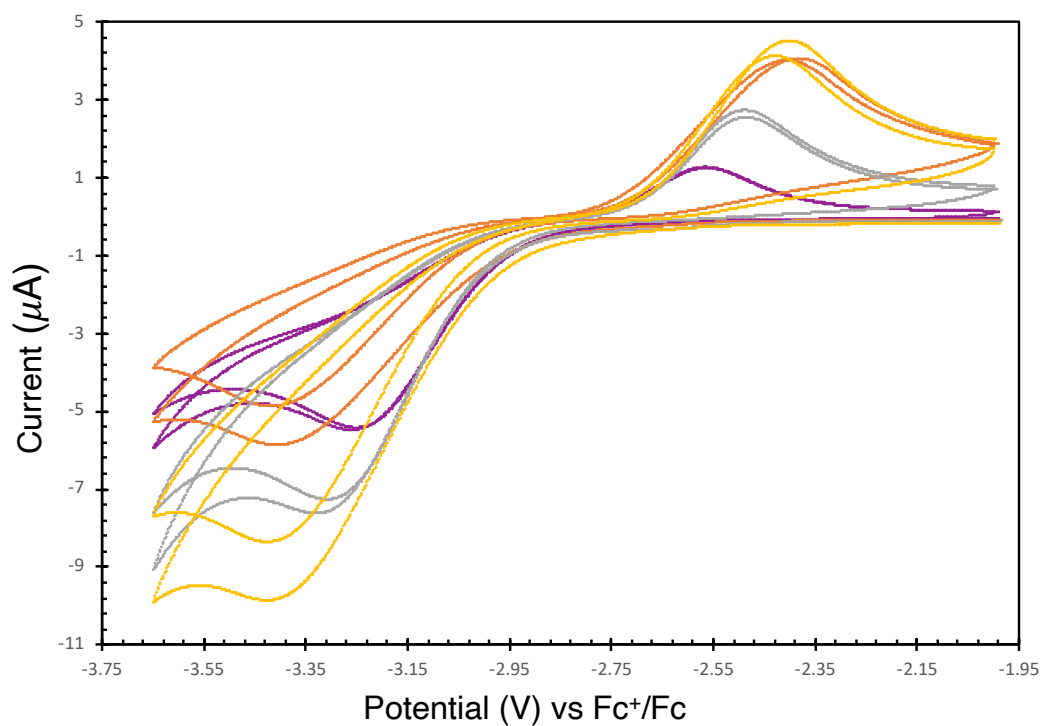

**Figure S81:** Reduction region of cyclic voltammogram of complex **1** recorded in 0.1 M [NBu<sub>4</sub>][BPh<sub>4</sub>] in 3.0 mM THF solution at 25°C, at different scan rates (purple: 50 mV/sec, orange: 75 mV/sec, grey: 100 mV/sec; yellow: 200 mV/sec), referenced against [Fe(C<sub>5</sub>H<sub>5</sub>)<sub>2</sub>]<sup>+0</sup>

## EPR data

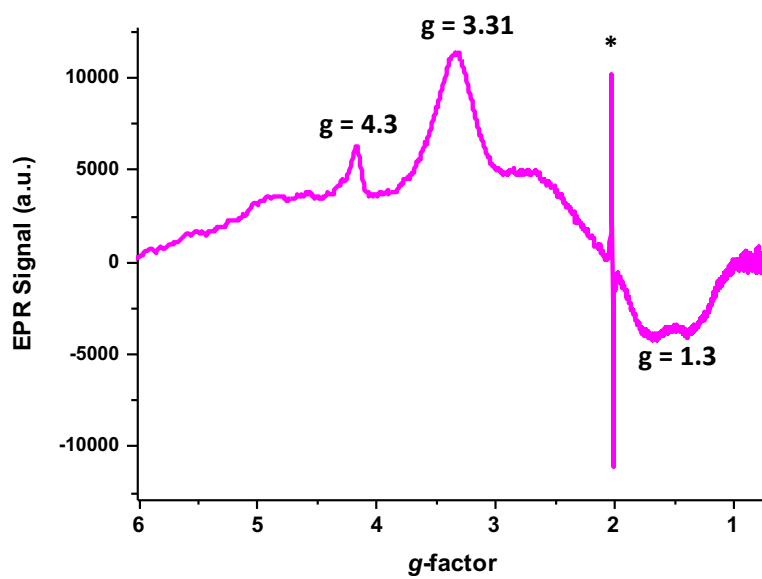

**Figure S82:** X-band EPR spectrum of frozen 20 mM solution of complex  $\text{Rb}_2\text{-N}_2$  in toluene:hexane (1:1) glass at 6 K. \* indicates a radical impurity present in the solution. ( $\nu = 9.397588$  GHz,  $P = 0.6332$  mW, amplitude modulation 5 G, frequency modulation 100 kHz).

## Computational Details

The optimization of three different spin states for uranium complexes were carried out by employing DFT hybrid functional (B3PW91)<sup>11</sup> along with small core pseudopotential Stuttgart basis set for uranium, rubidium, cesium and silicon atoms with additional polarization functions for rubidium, cesium and silicon atoms.<sup>12</sup> Pople basis sets (6-31G\*\*) were employed for the rest of the atoms.<sup>13</sup> Frequency calculations were performed to locate minima for the optimized structures. All the calculations were performed using Gaussian 09 suite of programs.<sup>14</sup> The density was analyzed using the NBO technic with three different versions of the program NBO3.1, NBO5.0 and NBO6.0

### Bonding orbitals from NBO analysis for ground state spin (s=3) for K<sub>2</sub>-2

(0.92139) BD ( 1) U 1 - O 32(Alpha)  
( 6.17%) 0.2484\* U1 s( 0.27%)p16.98( 4.51%)d99.99( 68.53%)f99.99( 26.68%)g 0.07( 0.02%)  
(93.83%) 0.9687\* O32 s( 1.84%)p53.35( 98.16%)d 0.00( 0.00%)  
(0.91548) BD ( 2) U 1 - O 32(Alpha)  
( 5.77%) 0.2401\* U1 s( 0.10%)p47.58( 4.99%)d99.99( 73.49%)f99.99( 21.39%)g 0.24( 0.02%)  
(94.23%) 0.9707\* O32 s( 0.09%)p99.99( 99.90%)d 0.02( 0.00%)  
(0.95011) BD ( 1) U 2 - O 32(Beta)  
( 6.90%) 0.2627\* U2 s( 0.03%)p99.99( 3.43%)d99.99( 60.23%)f99.99( 36.29%)g 1.39( 0.03%)  
(93.10%) 0.9649\* O32 s( 1.47%)p67.20( 98.53%)d 0.00( 0.00%)  
(0.94798) BD ( 2) U 2 - O 32(Beta)  
( 6.92%) 0.2630\* U2 s( 0.06%)p46.17( 2.89%)d99.99( 59.97%)f99.99( 37.04%)g 0.59( 0.04%)  
(93.08%) 0.9648\* O32 s( 2.41%)p40.51( 97.59%)d 0.00( 0.00%)

### Bonding orbitals from NBO analysis for ground state spin (s=1) for K<sub>2</sub>-N<sub>2</sub>

(0.97361) BD ( 1) U 1 - O 12(Alpha)  
( 11.06%) 0.3326\* U1 s( 7.90%)p 0.90( 7.13%)d 4.82( 38.07%) f 5.94( 46.88%)g 0.00( 0.03%)  
(88.94%) 0.9431\* O12 s( 43.23%)p 1.31( 56.74%)d 0.00( 0.02%)  
(0.90969) BD ( 2) U 1 - O 12(Alpha)  
( 10.18%) 0.3191\* U1 s( 1.16%)p 3.96( 4.59%)d30.35( 35.19%)f50.89( 59.00%)g 0.06( 0.07%)  
(89.82%) 0.9477\* O12 s( 1.38%)p71.37( 98.57%)d 0.03( 0.05%)  
(0.90149) BD ( 3) U 1 - O 12(Alpha)  
( 11.50%) 0.3391\* U1 s( 0.17%)p21.03( 3.53%)d99.99( 43.18%)f99.99( 53.09%)g 0.17( 0.03%)  
(88.50%) 0.9408\* O 12 s( 0.24%)p99.99( 99.71%)d 0.19( 0.05%)  
(0.92760) BD ( 1) U 1 - N 13(Alpha)  
( 18.90%) 0.4347\* U1 s( 11.16%)p 1.02( 11.33%)d 3.26( 36.36%) f 3.69( 41.12%)g 0.00( 0.03%)  
(81.10%) 0.9006\* N13 s( 46.97%)p 1.13( 52.98%)d 0.00( 0.05%)  
(0.88634) BD ( 2) U 1 - N 13(Alpha)  
( 14.29%) 0.3780\* U 1 s( 0.47%)p11.62( 5.50%)d36.33( 17.20%)f99.99( 76.81%)g 0.04( 0.02%)  
(85.71%) 0.9258\* N 13 s( 19.43%)p 4.14( 80.49%)d 0.00( 0.08%)  
(0.87270) BD ( 1) U 1 - N 14(Alpha)  
( 17.32%) 0.4161\* U 1 s( 12.81%)p 0.74( 9.42%)d 3.75( 47.97%) f 2.32( 29.77%)g 0.00( 0.02%)  
(82.68%) 0.9093\* N 14 s( 37.95%)p 1.63( 62.00%)d 0.00( 0.06%)  
(0.96321) BD ( 1) U 2 - O 12(Alpha)  
( 11.85%) 0.3442\* U 2 s( 7.44%)p 0.77( 5.71%)d 5.20( 38.64%) f 6.48( 48.18%)g 0.00( 0.03%)  
(88.15%) 0.9389\* O 12 s( 55.10%)p 0.81( 44.88%)d 0.00( 0.02%)  
(0.93524) BD ( 1) U 2 - N 14(Alpha)  
( 20.92%) 0.4574\* U 2 s( 6.32%)p 1.30( 8.23%)d 5.52( 34.92%) f 7.98( 50.49%)g 0.00( 0.03%)  
(79.08%) 0.8893\* N 14 s( 34.44%)p 1.90( 65.50%)d 0.00( 0.06%)  
(0.86486) BD ( 2) U 2 - N 14(Alpha)  
( 19.67%) 0.4435\* U 2 s( 2.76%)p 2.68( 7.42%)d 3.72( 10.28%) f28.77( 79.53%)g 0.01( 0.02%)  
(80.33%) 0.8963\* N 14 s( 6.07%)p15.45( 93.83%)d 0.02( 0.09%)  
(0.97739) BD ( 1) U 1 - O 12(Beta)  
( 10.07%) 0.3173\* U 1 s( 7.48%)p 0.99( 7.37%)d 5.37( 40.16%)f 6.01( 44.96%)g 0.00( 0.03%)  
(89.93%) 0.9483\* O 12 s( 42.02%)p 1.38( 57.96%)d 0.00( 0.02%)  
(0.91478) BD ( 2) U 1 - O 12(Beta)  
( 8.94%) 0.2990\* U 1 s( 1.74%)p 2.98( 5.19%)d21.31( 37.12%)f32.06( 55.85%)g 0.05( 0.09%)  
(91.06%) 0.9542\* O 12 s( 2.23%)p43.85( 97.72%)d 0.02( 0.05%)  
(0.91341) BD ( 3) U 1 - O 12(Beta)  
( 9.57%) 0.3093\* U 1 s( 0.31%)p14.31( 4.51%)d99.99( 42.44%)f99.99( 52.71%)g 0.12( 0.04%)  
(90.43%) 0.9510\* O 12 s( 0.37%)p99.99( 99.59%)d 0.12( 0.04%)  
(0.95297) BD ( 1) U 1 - N 13(Beta)  
( 13.55%) 0.3681\* U 1 s( 10.28%)p 1.20( 12.36%)d 3.79( 38.93%)f 3.74( 38.40%)g 0.00( 0.03%)



( 86.45%) 0.9298\* N 13 s( 53.14%)p 0.88( 46.81%)d 0.00( 0.04%)  
 (0.90140) BD ( 2) U 1 - N 13(Beta)  
 ( 11.87%) 0.3445\* U 1 s( 0.07%)p53.58( 3.73%)d99.99( 17.17%)f99.99( 79.00%)g 0.46( 0.03%)  
 ( 88.13%) 0.9388\* N 13 s( 6.12%)p15.32( 93.79%)d 0.01( 0.09%)  
 (0.91146) BD ( 1) U 1 - N 14(Beta)  
 ( 13.40%) 0.3660\* U 1 s( 12.98%)p 0.85( 11.01%)d 3.46( 44.96%)f 2.39( 31.03%)g 0.00( 0.02%)  
 ( 86.60%) 0.9306\* N 14 s( 44.70%)p 1.24( 55.25%)d 0.00( 0.05%)  
 (0.96561) BD ( 1) U 2 - O 12(Beta)  
 ( 10.62%) 0.3259\* U 2 s( 7.50%)p 0.82( 6.14%)d 5.45( 40.88%)f 6.06( 45.44%)g 0.00( 0.03%)  
 ( 89.38%) 0.9454\* O 12 s( 55.35%)p 0.81( 44.63%)d 0.00( 0.02%)  
 (0.95352) BD ( 1) U 2 - N 14(Beta)  
 ( 14.76%) 0.3842\* U 2 s( 6.45%)p 1.40( 9.00%)d 6.01( 38.72%)f 7.11( 45.81%)g 0.00( 0.03%)  
 ( 85.24%) 0.9232\* N 14 s( 36.22%)p 1.76( 63.72%)d 0.00( 0.06%)  
 (0.88712) BD ( 2) U 2 - N 14(Beta)  
 ( 15.09%) 0.3885\* U 2 s( 0.58%)p 9.01( 5.21%)d25.23( 14.59%)f99.99( 79.58%)g 0.06( 0.03%)  
 ( 84.91%) 0.9215\* N 14 s( 0.13%)p99.99( 99.78%)d 0.70( 0.09%)

**Bonding orbitals from NBO analysis for ground state spin (s=1) for K<sub>4</sub>-(N)<sub>2</sub>**

BD ( 1) U 1 - O 17(Alpha)  
 ( 18.12%) 0.4257\* U 1 s( 0.01%)p99.99( 1.59%)d99.99( 48.96%) f99.99( 49.35%)g 8.00( 0.09%)  
 ( 81.88%) 0.9049\* O 17 s( 0.08%)p99.99( 99.85%)d 0.79( 0.07%)  
 BD ( 2) U 1 - O 17(Alpha)  
 ( 17.91%) 0.4232\* U 1 s( 0.01%)p 1.00( 0.99%)d52.69( 51.92%) f47.66( 46.97%)g 0.12( 0.12%)  
 ( 82.09%) 0.9060\* O 17 s( 2.65%)p36.71( 97.29%)d 0.02( 0.06%)  
 BD ( 3) U 1 - O 17(Alpha)  
 ( 20.03%) 0.4476\* U 1 s( 2.47%)p 0.43( 1.07%)d17.24( 42.65%) f21.66( 53.58%)g 0.09( 0.22%)  
 ( 79.97%) 0.8943\* O 17 s( 30.41%)p 2.29( 69.55%)d 0.00( 0.04%)  
 BD ( 1) U 1 - N 38(Alpha)  
 ( 18.68%) 0.4322\* U 1 s( 10.38%)p 0.76( 7.87%)d 5.09( 52.83%) f 2.78( 28.89%)g 0.00( 0.04%)  
 ( 81.32%) 0.9018\* N 38 s( 50.24%)p 0.99( 49.74%)d 0.00( 0.01%)  
 BD ( 1) U 1 - N 39(Alpha)  
 ( 29.84%) 0.5462\* U 1 s( 2.64%)p 0.62( 1.62%)d19.31( 50.95%) f16.94( 44.70%)g 0.04( 0.09%)  
 ( 70.16%) 0.8376\* N 39 s( 39.60%)p 1.52( 60.23%)d 0.00( 0.16%)  
 BD ( 2) U 1 - N 39(Alpha)  
 ( 27.75%) 0.5268\* U 1 s( 0.03%)p99.99( 3.92%)d99.99( 46.32%) f99.99( 49.66%)g 2.88( 0.07%)  
 ( 72.25%) 0.8500\* N 39 s( 0.09%)p99.99( 99.78%)d 1.55( 0.14%)  
 BD ( 3) U 1 - N 39(Alpha)  
 ( 28.97%) 0.5383\* U 1 s( 0.01%)p99.99( 1.28%)d99.99( 47.79%) f99.99( 50.89%)g 3.47( 0.04%)  
 ( 71.03%) 0.8428\* N 39 s( 0.06%)p99.99( 99.81%)d 2.35( 0.13%)  
 BD ( 1) U 2 - N 38(Alpha)  
 ( 18.30%) 0.4277\* U 2 s( 9.05%)p 0.18( 1.61%)d 4.38( 39.69%) f 5.48( 49.61%)g 0.00( 0.03%)  
 ( 81.70%) 0.9039\* N 38 s( 43.26%)p 1.31( 56.73%)d 0.00( 0.01%)  
 BD ( 1) U 2 - N 39(Alpha)  
 ( 12.40%) 0.3521\* U 2 s( 13.37%)p 0.54( 7.19%)d 3.75( 50.19%) f 2.19( 29.25%)g 0.00( 0.01%)  
 ( 87.60%) 0.9359\* N 39 s( 60.32%)p 0.66( 39.64%)d 0.00( 0.04%)  
 BD ( 1) U 1 - O 17(Beta)  
 ( 18.16%) 0.4262\* U 1 s( 0.01%)p 1.00( 1.59%)d30.77( 49.00%)f30.96( 49.30%)g 0.06( 0.09%)  
 ( 81.84%) 0.9046\* O 17 s( 0.03%)p99.99( 99.90%)d 2.00( 0.07%)  
 BD ( 2) U 1 - O 17(Beta)  
 ( 17.82%) 0.4221\* U 1 s( 0.02%)p59.27( 0.93%)d99.99( 51.79%)f99.99( 47.14%)g 7.50( 0.12%)  
 ( 82.18%) 0.9066\* O 17 s( 2.97%)p32.65( 96.97%)d 0.02( 0.06%)  
 BD ( 3) U 1 - O 17(Beta)  
 ( 19.96%) 0.4468\* U 1 s( 2.50%)p 0.41( 1.02%)d17.42( 43.46%)f21.16( 52.80%)g 0.09( 0.22%)  
 ( 80.04%) 0.8946\* O 17 s( 30.27%)p 2.30( 69.69%)d 0.00( 0.04%)  
 BD ( 1) U 1 - N 38(Beta)  
 ( 18.50%) 0.4301\* U 1 s( 10.58%)p 0.69( 7.28%)d 4.93( 52.11%)f 2.83( 29.99%)g 0.00( 0.04%)  
 ( 81.50%) 0.9028\* N 38 s( 44.33%)p 1.26( 55.66%)d 0.00( 0.01%)  
 BD ( 1) U 1 - N 39(Beta)  
 ( 29.77%) 0.5457\* U 1 s( 2.25%)p 0.71( 1.60%)d22.51( 50.76%)f20.09( 45.29%)g 0.04( 0.09%)  
 ( 70.23%) 0.8380\* N 39 s( 36.58%)p 1.73( 63.26%)d 0.00( 0.16%)  
 BD ( 2) U 1 - N 39(Beta)  
 ( 28.19%) 0.5309\* U 1 s( 0.03%)p76.69( 2.43%)d99.99( 47.62%)f99.99( 49.85%)g 2.09( 0.07%)  
 ( 71.81%) 0.8474\* N 39 s( 0.16%)p99.99( 99.71%)d 0.86( 0.14%)  
 BD ( 3) U 1 - N 39(Beta)

( 28.55%) 0.5343\* U 1 s( 0.01%)p99.99( 2.30%)d99.99( 46.20%)f99.99( 51.42%)g 3.98( 0.06%)  
 ( 71.45%) 0.8453\* N 39 s( 0.26%)p99.99( 99.60%)d 0.53( 0.14%)  
 BD ( 1) U 2 - N 38(Beta)  
 ( 15.43%) 0.3928\* U 2 s( 9.82%)p 0.20( 1.99%)d 4.55( 44.73%)f 4.42( 43.42%)g 0.00( 0.04%)  
 ( 84.57%) 0.9196\* N 38 s( 47.87%)p 1.09( 52.12%)d 0.00( 0.01%)  
 BD ( 1) U 2 - N 39(Beta)  
 ( 11.39%) 0.3374\* U 2 s( 12.53%)p 0.58( 7.32%)d 3.99( 50.04%)f 2.40( 30.10%)g 0.00( 0.01%)  
 ( 88.61%) 0.9414\* N 39 s( 63.07%)p 0.58( 36.89%)d 0.00( 0.03%)

**Bonding orbitals from NBO analysis for ground state spin (s=3) for Rb<sub>2</sub>-2**

BD ( 1) U 1 - O 35(Alpha)  
 ( 9.78%) 0.3128\* U 1 s( 0.69%)p 3.00( 2.07%)d65.60( 45.37%) f74.96( 51.85%)g 0.02( 0.02%)  
 ( 90.22%) 0.9498\* O 35 s( 0.17%)p99.99( 99.83%)d 0.00( 0.00%)  
 BD ( 2) U 1 - O 35(Alpha)  
 ( 9.77%) 0.3126\* U 1 s( 0.62%)p 4.42( 2.73%)d66.60( 41.16%) f89.78( 55.48%)g 0.03( 0.02%)  
 ( 90.23%) 0.9499\* O 35 s( 0.62%)p99.99( 99.38%)d 0.00( 0.00%)  
 BD ( 1) U 2 - O 35(Beta)  
 ( 6.23%) 0.2496\* U 2 s( 0.01%)p 1.00( 3.19%)d18.85( 60.15%)f11.47( 36.62%)g 0.01( 0.04%)  
 ( 93.77%) 0.9684\* O 35 s( 1.54%)p64.10( 98.46%)d 0.00( 0.00%)  
 BD ( 2) U 2 - O 35(Beta)  
 ( 6.15%) 0.2481\* U 2 s( 0.01%)p 1.00( 3.73%)d15.88( 59.25%)f 9.91( 36.98%)g 0.01( 0.04%)  
 ( 93.85%) 0.9687\* O 35 s( 0.31%)p99.99( 99.69%)d 0.00( 0.00%)

**Bonding orbitals from NBO analysis for ground state spin (s=1) for Rb<sub>2</sub>-N<sub>2</sub>**

BD ( 1) U 1 - O 11(Alpha)  
 ( 10.82%) 0.3290\* U 1 s( 7.64%)p 0.88( 6.70%)d 5.04( 38.49%) f 6.17( 47.13%)g 0.00( 0.03%)  
 ( 89.18%) 0.9443\* O 11 s( 43.32%)p 1.31( 56.65%)d 0.00( 0.02%)  
 BD ( 2) U 1 - O 11(Alpha)  
 ( 10.07%) 0.3174\* U 1 s( 1.25%)p 3.81( 4.76%)d28.11( 35.19%) f46.91( 58.73%)g 0.05( 0.07%)  
 ( 89.93%) 0.9483\* O 11 s( 1.28%)p77.27( 98.68%)d 0.04( 0.05%)  
 BD ( 3) U 1 - O 11(Alpha)  
 ( 11.45%) 0.3383\* U 1 s( 0.18%)p18.89( 3.42%)d99.99( 42.96%) f99.99( 53.40%)g 0.16( 0.03%)  
 ( 88.55%) 0.9410\* O 11 s( 0.18%)p99.99( 99.77%)d 0.25( 0.05%)  
 BD ( 1) U 1 - N 36(Alpha)  
 ( 18.86%) 0.4343\* U 1 s( 10.44%)p 1.05( 10.96%)d 3.52( 36.73%) f 4.01( 41.84%)g 0.00( 0.03%)  
 ( 81.14%) 0.9008\* N 36 s( 46.67%)p 1.14( 53.28%)d 0.00( 0.05%)  
 BD ( 2) U 1 - N 36(Alpha)  
 ( 14.44%) 0.3800\* U 1 s( 0.38%)p14.51( 5.55%)d44.80( 17.15%) f99.99( 76.90%)g 0.04( 0.02%)  
 ( 85.56%) 0.9250\* N 36 s( 20.03%)p 3.99( 79.89%)d 0.00( 0.08%)  
 BD ( 1) U 1 - N 37(Alpha)  
 ( 17.29%) 0.4159\* U 1 s( 12.10%)p 0.75( 9.08%)d 4.06( 49.11%) f 2.45( 29.69%)g 0.00( 0.02%)  
 ( 82.71%) 0.9094\* N 37 s( 37.39%)p 1.67( 62.55%)d 0.00( 0.06%)  
 BD ( 1) U 2 - O 11(Alpha)  
 ( 11.69%) 0.3419\* U 2 s( 7.11%)p 0.74( 5.27%)d 5.46( 38.78%) f 6.87( 48.80%)g 0.00( 0.03%)  
 ( 88.31%) 0.9397\* O 11 s( 55.18%)p 0.81( 44.80%)d 0.00( 0.02%)  
 BD ( 1) U 2 - N 37(Alpha)  
 ( 21.10%) 0.4593\* U 2 s( 5.68%)p 1.41( 8.00%)d 6.19( 35.16%) f 9.01( 51.14%)g 0.00( 0.03%)  
 ( 78.90%) 0.8883\* N 37 s( 33.80%)p 1.96( 66.13%)d 0.00( 0.06%)  
 BD ( 2) U 2 - N 37(Alpha)  
 ( 19.94%) 0.4466\* U 2 s( 2.49%)p 3.13( 7.78%)d 4.12( 10.24%) f31.95( 79.47%)g 0.01( 0.01%)  
 ( 80.06%) 0.8947\* N 37 s( 6.68%)p13.96( 93.23%)d 0.01( 0.09%)  
 BD ( 1) U 1 - O 11(Beta)  
 ( 10.43%) 0.3229\* U 1 s( 8.46%)p 0.09( 0.78%)d 3.86( 32.61%)f 6.87( 58.08%)g 0.01( 0.07%)  
 ( 89.57%) 0.9464\* O 11 s( 19.67%)p 4.08( 80.30%)d 0.00( 0.03%)  
 BD ( 2) U 1 - O 11(Beta)  
 ( 9.58%) 0.3095\* U 1 s( 0.06%)p69.16( 4.29%)d99.99( 44.70%)f99.99( 50.92%)g 0.55( 0.03%)  
 ( 90.42%) 0.9509\* O 11 s( 0.00%)p 1.00( 99.95%)d 0.00( 0.04%)  
 BD ( 1) U 1 - N 36(Beta)  
 ( 13.39%) 0.3659\* U 1 s( 9.07%)p 1.13( 10.29%)d 4.14( 37.53%)f 4.75( 43.09%)g 0.00( 0.03%)  
 ( 86.61%) 0.9307\* N 36 s( 53.68%)p 0.86( 46.27%)d 0.00( 0.04%)  
 BD ( 2) U 1 - N 36(Beta)  
 ( 11.81%) 0.3436\* U 1 s( 0.09%)p43.65( 3.71%)d99.99( 17.14%)f99.99( 79.04%)g 0.37( 0.03%)  
 ( 88.19%) 0.9391\* N 36 s( 5.81%)p16.19( 94.10%)d 0.02( 0.09%)  
 BD ( 1) U 1 - N 37(Beta)

( 13.11%) 0.3621\* U 1 s( 11.68%)p 0.84( 9.82%)d 3.67( 42.82%)f 3.05( 35.66%)g 0.00( 0.02%)  
 ( 86.89%) 0.9321\* N 37 s( 44.68%)p 1.24( 55.27%)d 0.00( 0.05%)  
 BD ( 1) U 2 - O 11(Beta)  
 ( 10.69%) 0.3270\* U 2 s( 5.93%)p 0.19( 1.14%)d 6.07( 35.98%)f 9.60( 56.89%)g 0.01( 0.07%)  
 ( 89.31%) 0.9450\* O 11 s( 19.58%)p 4.10( 80.38%)d 0.00( 0.03%)  
 BD ( 1) U 2 - N 37(Beta)  
 ( 14.47%) 0.3804\* U 2 s( 6.32%)p 1.36( 8.62%)d 6.01( 37.97%)f 7.45( 47.06%)g 0.00( 0.03%)  
 ( 85.53%) 0.9248\* N 37 s( 35.84%)p 1.79( 64.10%)d 0.00( 0.06%)  
 BD ( 2) U 2 - N 37(Beta)  
 ( 15.00%) 0.3872\* U 2 s( 0.48%)p10.86( 5.19%)d31.39( 14.99%)f99.99( 79.32%)g 0.06( 0.03%)  
 ( 85.00%) 0.9220\* N 37 s( 0.10%)p99.99( 99.80%)d 0.88( 0.09%)

**Bonding orbitals from NBO analysis for ground state spin (s=1) for Rb<sub>4</sub>-(N)<sub>2</sub>**

BD ( 1) U 1 - O 17(Alpha)  
 ( 18.19%) 0.4265\* U 1 s( 0.01%)p 1.00( 1.36%)d36.10( 49.03%)f36.45( 49.51%)g 0.07( 0.10%)  
 ( 81.81%) 0.9045\* O 17 s( 0.42%)p99.99( 99.51%)d 0.15( 0.06%)  
 BD ( 2) U 1 - O 17(Alpha)  
 ( 18.21%) 0.4267\* U 1 s( 0.10%)p 7.09( 0.74%)d99.99( 51.85%)f99.99( 47.16%)g 1.33( 0.14%)  
 ( 81.79%) 0.9044\* O 17 s( 6.98%)p13.32( 92.96%)d 0.01( 0.06%)  
 BD ( 3) U 1 - O 17(Alpha)  
 ( 19.84%) 0.4454\* U 1 s( 1.76%)p 0.72( 1.27%)d24.17( 42.60%)f30.73( 54.17%)g 0.11( 0.19%)  
 ( 80.16%) 0.8953\* O 17 s( 25.75%)p 2.88( 74.20%)d 0.00( 0.04%)  
 BD ( 1) U 1 - N 38(Alpha)  
 ( 18.42%) 0.4292\* U 1 s( 9.33%)p 0.79( 7.34%)d 5.82( 54.26%)f 3.11( 29.03%)g 0.00( 0.04%)  
 ( 81.58%) 0.9032\* N 38 s( 50.74%)p 0.97( 49.25%)d 0.00( 0.01%)  
 BD ( 1) U 1 - N 39(Alpha)  
 ( 29.80%) 0.5459\* U 1 s( 2.19%)p 0.65( 1.43%)d23.74( 51.92%)f20.29( 44.36%)g 0.05( 0.10%)  
 ( 70.20%) 0.8379\* N 39 s( 39.00%)p 1.56( 60.84%)d 0.00( 0.17%)  
 BD ( 2) U 1 - N 39(Alpha)  
 ( 27.80%) 0.5273\* U 1 s( 0.05%)p75.34( 4.05%)d99.99( 46.20%)f99.99( 49.62%)g 1.36( 0.07%)  
 ( 72.20%) 0.8497\* N 39 s( 0.07%)p99.99( 99.79%)d 2.04( 0.14%)  
 BD ( 3) U 1 - N 39(Alpha)  
 ( 29.15%) 0.5399\* U 1 s( 0.05%)p25.84( 1.20%)d99.99( 48.07%)f99.99( 50.64%)g 0.90( 0.04%)  
 ( 70.85%) 0.8417\* N 39 s( 0.02%)p99.99( 99.84%)d 6.11( 0.14%)  
 BD ( 1) U 2 - N 38(Alpha)  
 ( 18.41%) 0.4291\* U 2 s( 8.60%)p 0.16( 1.40%)d 4.55( 39.10%)f 5.92( 50.87%)g 0.00( 0.03%)  
 ( 81.59%) 0.9032\* N 38 s( 42.89%)p 1.33( 57.10%)d 0.00( 0.02%)  
 BD ( 1) U 2 - N 39(Alpha)  
 ( 12.24%) 0.3498\* U 2 s( 12.85%)p 0.55( 7.02%)d 3.96( 50.86%)f 2.28( 29.26%)g 0.00( 0.01%)  
 ( 87.76%) 0.9368\* N 39 s( 60.96%)p 0.64( 39.00%)d 0.00( 0.04%)  
 BD ( 1) U 1 - O 17(Beta)  
 ( 18.25%) 0.4272\* U 1 s( 0.01%)p99.99( 1.33%)d99.99( 49.08%)f99.99( 49.48%)g 8.48( 0.10%)  
 ( 81.75%) 0.9042\* O 17 s( 0.72%)p99.99( 99.22%)d 0.09( 0.06%)  
 BD ( 2) U 1 - O 17(Beta)  
 ( 18.06%) 0.4249\* U 1 s( 0.11%)p 7.34( 0.79%)d99.99( 51.52%)f99.99( 47.45%)g 1.26( 0.14%)  
 ( 81.94%) 0.9052\* O 17 s( 6.20%)p15.13( 93.75%)d 0.01( 0.06%)  
 BD ( 3) U 1 - O 17(Beta)  
 ( 19.81%) 0.4450\* U 1 s( 1.78%)p 0.65( 1.15%)d24.47( 43.61%)f29.88( 53.26%)g 0.11( 0.20%)  
 ( 80.19%) 0.8955\* O 17 s( 26.38%)p 2.79( 73.58%)d 0.00( 0.04%)  
 BD ( 1) U 1 - N 38(Beta)  
 ( 18.24%) 0.4270\* U 1 s( 9.48%)p 0.71( 6.76%)d 5.65( 53.55%)f 3.18( 30.18%)g 0.00( 0.04%)  
 ( 81.76%) 0.9042\* N 38 s( 44.56%)p 1.24( 55.43%)d 0.00( 0.01%)  
 BD ( 1) U 1 - N 39(Beta)  
 ( 29.77%) 0.5456\* U 1 s( 1.87%)p 0.76( 1.42%)d27.67( 51.61%)f24.12( 45.00%)g 0.05( 0.10%)  
 ( 70.23%) 0.8380\* N 39 s( 36.01%)p 1.77( 63.82%)d 0.00( 0.17%)  
 BD ( 2) U 1 - N 39(Beta)  
 ( 28.21%) 0.5311\* U 1 s( 0.05%)p52.20( 2.86%)d99.99( 47.01%)f99.99( 50.01%)g 1.29( 0.07%)  
 ( 71.79%) 0.8473\* N 39 s( 0.18%)p99.99( 99.67%)d 0.77( 0.14%)  
 BD ( 3) U 1 - N 39(Beta)  
 ( 28.72%) 0.5359\* U 1 s( 0.03%)p66.18( 1.95%)d99.99( 47.04%)f99.99( 50.93%)g 1.72( 0.05%)  
 ( 71.28%) 0.8443\* N 39 s( 0.12%)p99.99( 99.74%)d 1.23( 0.14%)  
 BD ( 1) U 2 - N 38(Beta)  
 ( 15.45%) 0.3931\* U 2 s( 9.44%)p 0.18( 1.72%)d 4.71( 44.44%)f 4.70( 44.36%)g 0.00( 0.04%)  
 ( 84.55%) 0.9195\* N 38 s( 47.69%)p 1.10( 52.29%)d 0.00( 0.02%)

BD ( 1) U 2 - N 39(Beta)  
( 11.26%) 0.3356\* U 2 s( 12.10%)p 0.58( 7.06%)d 4.18( 50.62%)f 2.50( 30.21%)g 0.00( 0.01%)  
( 88.74%) 0.9420\* N 39 s( 63.75%)p 0.57( 36.22%)d 0.00( 0.03%)

**Bonding orbitals from NBO analysis for ground state spin (s=3) for Cs<sub>2</sub>-2**

BD ( 1) U 1 - O 11(Alpha)  
( 7.43%) 0.2725\* U 1 s( 0.03%)p99.99( 3.79%)d99.99( 61.69%)f99.99( 34.47%)g 0.78( 0.02%)  
( 92.57%) 0.9622\* O 11 s( 0.18%)p99.99( 99.82%)d 0.00( 0.00%)

BD ( 2) U 1 - O 11(Alpha)  
( 7.29%) 0.2700\* U 1 s( 0.04%)p97.26( 3.70%)d99.99( 61.55%)f99.99( 34.70%)g 0.53( 0.02%)  
( 92.71%) 0.9629\* O 11 s( 0.20%)p99.99( 99.80%)d 0.00( 0.00%)

BD ( 1) U 2 - O 11(Beta)  
( 6.15%) 0.2479\* U 2 s( 0.00%)p 1.00( 3.86%)d15.66( 60.48%) f 9.23( 35.63%)g 0.01( 0.03%)  
( 93.85%) 0.9688\* O 11 s( 0.14%)p99.99( 99.86%)d 0.00( 0.00%)

BD ( 2) U 2 - O 11(Beta)  
( 6.05%) 0.2460\* U 2 s( 0.01%)p 1.00( 2.70%)d22.00( 59.31%) f14.08( 37.95%)g 0.01( 0.03%)  
( 93.95%) 0.9693\* O 11 s( 0.09%)p99.99( 99.91%)d 0.00( 0.00%)

(0.92978) BD ( 1) U 2 - O 11

**Bonding orbitals from NBO analysis for ground state spin (s=1) for Cs<sub>2</sub>-N<sub>2</sub>**

(0.93642) BD ( 1) U 1 - O 11(Alpha)  
( 12.17%) 0.3488\* U 1 s( 6.81%)p 0.07( 0.46%)d 4.23( 28.84%) f 9.37( 63.83%)g 0.01( 0.06%)  
( 87.83%) 0.9372\* O 11 s( 15.03%)p 5.65( 84.93%)d 0.00( 0.03%)

(0.90951) BD ( 2) U 1 - O 11(Alpha)  
( 12.04%) 0.3470\* U 1 s( 0.34%)p 9.63( 3.26%)d99.99( 42.70%) f99.99( 53.67%)g 0.08( 0.03%)  
( 87.96%) 0.9379\* O 11 s( 0.18%)p99.99( 99.77%)d 0.24( 0.04%)

(0.88685) BD ( 1) U 1 - N 36(Alpha)  
( 17.95%) 0.4237\* U 1 s( 8.06%)p 1.36( 10.93%)d 4.38( 35.33%) f 5.66( 45.65%)g 0.00( 0.03%)  
( 82.05%) 0.9058\* N 36 s( 52.66%)p 0.90( 47.31%)d 0.00( 0.04%)

(0.86424) BD ( 2) U 1 - N 36(Alpha)  
( 12.41%) 0.3522\* U 1 s( 0.19%)p37.26( 6.93%)d87.67( 16.32%) f99.99( 76.54%)g 0.10( 0.02%)  
( 87.59%) 0.9359\* N 36 s( 21.75%)p 3.59( 78.17%)d 0.00( 0.08%)

(0.91434) BD ( 1) U 1 - N 37(Alpha)  
( 14.18%) 0.3765\* U 1 s( 9.37%)p 0.86( 8.02%)d 5.03( 47.09%) f 3.79( 35.50%)g 0.00( 0.02%)  
( 85.82%) 0.9264\* N 37 s( 43.22%)p 1.31( 56.72%)d 0.00( 0.06%)

(0.92978) BD ( 1) U 2 - O 11(Alpha)  
( 11.73%) 0.3426\* U 2 s( 6.20%)p 0.13( 0.79%)d 5.24( 32.51%) f 9.74( 60.43%)g 0.01( 0.07%)  
( 88.27%) 0.9395\* O 11 s( 15.05%)p 5.64( 84.91%)d 0.00( 0.04%)

(0.84741) BD ( 1) U 2 - N 36(Alpha)  
( 26.50%) 0.5148\* U 2 s( 2.81%)p 0.63( 1.78%)d 4.01( 11.28%) f29.88( 84.11%)g 0.01( 0.02%)  
( 73.50%) 0.8573\* N 36 s( 0.36%)p99.99( 99.54%)d 0.29( 0.10%)

(0.92734) BD ( 1) U 2 - N 37(Alpha)  
( 21.01%) 0.4583\* U 2 s( 6.56%)p 0.44( 2.86%)d 5.56( 36.52%) f 8.23( 54.02%)g 0.01( 0.04%)  
( 78.99%) 0.8888\* N 37 s( 35.40%)p 1.82( 64.54%)d 0.00( 0.06%)

(0.94800) BD ( 1) U 1 - O 11(Beta)  
( 9.62%) 0.3102\* U 1 s( 5.14%)p 0.31( 1.61%)d 7.09( 36.42%)f11.05( 56.76%)g 0.01( 0.07%)  
( 90.38%) 0.9507\* O 11 s( 7.66%)p12.05( 92.31%)d 0.00( 0.03%)

(0.91953) BD ( 2) U 1 - O 11(Beta)  
( 9.72%) 0.3118\* U 1 s( 0.47%)p 7.14( 3.37%)d91.77( 43.27%)f99.99( 52.86%)g 0.07( 0.03%)  
( 90.28%) 0.9501\* O 11 s( 0.03%)p99.99( 99.93%)d 1.48( 0.04%)

(0.89868) BD ( 3) U 1 - O 11(Beta)  
( 8.10%) 0.2846\* U 1 s( 0.50%)p10.70( 5.31%)d83.64( 41.51%)f99.99( 52.65%)g 0.07( 0.03%)  
( 91.90%) 0.9586\* O 11 s( 25.70%)p 2.89( 74.26%)d 0.00( 0.03%)

(0.93294) BD ( 1) U 1 - N 36(Beta)  
( 11.93%) 0.3454\* U 1 s( 5.44%)p 2.22( 12.08%)d 7.56( 41.13%)f 7.59( 41.32%)g 0.01( 0.03%)  
( 88.07%) 0.9384\* N 36 s( 67.97%)p 0.47( 32.00%)d 0.00( 0.03%)

(0.90055) BD ( 2) U 1 - N 36(Beta)  
( 10.86%) 0.3295\* U 1 s( 0.16%)p36.26( 5.94%)d85.02( 13.92%)f99.99( 79.94%)g 0.20( 0.03%)  
( 89.14%) 0.9441\* N 36 s( 7.93%)p11.59( 91.98%)d 0.01( 0.09%)

(0.88176) BD ( 1) U 2 - N 36(Beta)  
( 14.69%) 0.3833\* U 2 s( 2.47%)p 1.08( 2.65%)d11.19( 27.59%)f27.28( 67.25%)g 0.02( 0.04%)  
( 85.31%) 0.9236\* N 36 s( 1.51%)p65.33( 98.40%)d 0.06( 0.09%)

(0.92674) BD ( 1) U 2 - N 37(Beta)  
( 18.62%) 0.4315\* U 2 s( 3.74%)p 0.32( 1.21%)d 9.04( 33.78%)f16.39( 61.23%)g 0.01( 0.05%)

( 81.38%) 0.9021\* N 37 s( 9.53%)p 9.49( 90.39%)d 0.01( 0.08%)

**Bonding orbitals from NBO analysis for ground state spin (s=1) for Cs<sub>4</sub>-(N)<sub>2</sub>**

(0.98145) BD ( 1) U 1 - O 17(Alpha)  
( 18.90%) 0.4347\* U 1 s( 0.26%)p 3.65( 0.96%)d99.99( 47.74%) f99.99( 50.87%)g 0.64( 0.17%)  
( 81.10%) 0.9006\* O 17 s( 11.92%)p 7.38( 88.02%)d 0.00( 0.05%)  
(0.97951) BD ( 2) U 1 - O 17(Alpha)  
( 18.61%) 0.4314\* U 1 s( 0.56%)p 1.44( 0.80%)d84.47( 47.01%) f92.45( 51.46%)g 0.31( 0.17%)  
( 81.39%) 0.9022\* O 17 s( 15.89%)p 5.29( 84.06%)d 0.00( 0.05%)  
(0.99101) BD ( 3) U 1 - O 17(Alpha)  
( 18.11%) 0.4256\* U 1 s( 0.14%)p11.20( 1.57%)d99.99( 48.88%) f99.99( 49.32%)g 0.67( 0.09%)  
( 81.89%) 0.9049\* O 17 s( 2.21%)p44.32( 97.73%)d 0.03( 0.06%)  
(0.95720) BD ( 1) U 1 - N 38(Alpha)  
( 17.03%) 0.4126\* U 1 s( 5.26%)p 1.49( 7.84%)d10.97( 57.72%) f 5.54( 29.13%)g 0.01( 0.04%)  
( 82.97%) 0.9109\* N 38 s( 51.94%)p 0.92( 48.04%)d 0.00( 0.01%)  
(0.94228) BD ( 1) U 1 - N 39(Alpha)  
( 28.91%) 0.5377\* U 1 s( 1.18%)p 1.14( 1.34%)d45.77( 53.90%) f36.90( 43.46%)g 0.10( 0.11%)  
( 71.09%) 0.8431\* N 39 s( 39.14%)p 1.55( 60.69%)d 0.00( 0.18%)  
(0.92407) BD ( 2) U 1 - N 39(Alpha)  
( 27.83%) 0.5276\* U 1 s( 0.24%)p17.03( 4.13%)d99.99( 45.44%) f99.99( 50.12%)g 0.29( 0.07%)  
( 72.17%) 0.8495\* N 39 s( 0.06%)p99.99( 99.79%)d 2.76( 0.16%)  
(0.94234) BD ( 3) U 1 - N 39(Alpha)  
( 29.33%) 0.5415\* U 1 s( 0.08%)p13.75( 1.15%)d99.99( 47.63%) f99.99( 51.10%)g 0.49( 0.04%)  
( 70.67%) 0.8407\* N 39 s( 0.01%)p99.99( 99.84%)d11.56( 0.15%)  
(0.96571) BD ( 1) U 2 - N 38(Alpha)  
( 18.09%) 0.4253\* U 2 s( 8.65%)p 0.21( 1.81%)d 4.50( 38.93%) f 5.84( 50.57%)g 0.00( 0.03%)  
( 81.91%) 0.9050\* N 38 s( 41.54%)p 1.41( 58.44%)d 0.00( 0.02%)  
(0.91784) BD ( 1) U 2 - N 39(Alpha)  
( 12.21%) 0.3494\* U 2 s( 12.50%)p 0.62( 7.78%)d 4.14( 51.70%) f 2.24( 28.01%)g 0.00( 0.01%)  
( 87.79%) 0.9370\* N 39 s( 60.86%)p 0.64( 39.10%)d 0.00( 0.04%)  
(0.97930) BD ( 1) U 1 - O 17(Beta)  
( 18.94%) 0.4352\* U 1 s( 0.31%)p 2.80( 0.87%)d99.99( 47.82%)f99.99( 50.82%)g 0.59( 0.18%)  
( 81.06%) 0.9003\* O 17 s( 13.56%)p 6.37( 86.39%)d 0.00( 0.05%)  
(0.98214) BD ( 2) U 1 - O 17(Beta)  
( 18.39%) 0.4288\* U 1 s( 0.47%)p 1.78( 0.83%)d99.99( 47.75%)f99.99( 50.79%)g 0.34( 0.16%)  
( 81.61%) 0.9034\* O 17 s( 13.17%)p 6.59( 86.78%)d 0.00( 0.05%)  
(0.99034) BD ( 3) U 1 - O 17(Beta)  
( 18.17%) 0.4262\* U 1 s( 0.14%)p10.09( 1.46%)d99.99( 48.80%)f99.99( 49.50%)g 0.68( 0.10%)  
( 81.83%) 0.9046\* O 17 s( 3.39%)p28.50( 96.55%)d 0.02( 0.06%)  
(0.96308) BD ( 1) U 1 - N 38(Beta)  
( 16.92%) 0.4114\* U 1 s( 5.16%)p 1.40( 7.20%)d11.04( 56.93%)f 5.95( 30.67%)g 0.01( 0.04%)  
( 83.08%) 0.9115\* N 38 s( 45.78%)p 1.18( 54.20%)d 0.00( 0.01%)  
(0.94563) BD ( 1) U 1 - N 39(Beta)  
( 28.98%) 0.5384\* U 1 s( 0.94%)p 1.36( 1.28%)d56.91( 53.71%)f46.58( 43.96%)g 0.12( 0.11%)  
( 71.02%) 0.8427\* N 39 s( 36.08%)p 1.77( 63.74%)d 0.00( 0.18%)  
(0.92965) BD ( 2) U 1 - N 39(Beta)  
( 27.97%) 0.5289\* U 1 s( 0.17%)p20.08( 3.48%)d99.99( 45.61%)f99.99( 50.66%)g 0.43( 0.07%)  
( 72.03%) 0.8487\* N 39 s( 0.16%)p99.99( 99.68%)d 0.98( 0.16%)  
(0.94758) BD ( 3) U 1 - N 39(Beta)  
( 29.07%) 0.5392\* U 1 s( 0.09%)p15.69( 1.42%)d99.99( 47.13%)f99.99( 51.31%)g 0.48( 0.04%)  
( 70.93%) 0.8422\* N 39 s( 0.03%)p99.99( 99.82%)d 5.15( 0.15%)  
(0.96701) BD ( 1) U 2 - N 38(Beta)  
( 15.14%) 0.3890\* U 2 s( 9.46%)p 0.23( 2.22%)d 4.67( 44.16%)f 4.67( 44.13%)g 0.00( 0.04%)  
( 84.86%) 0.9212\* N 38 s( 46.09%)p 1.17( 53.90%)d 0.00( 0.02%)  
(0.92368) BD ( 1) U 2 - N 39(Beta)  
( 11.30%) 0.3362\* U 2 s( 11.51%)p 0.68( 7.85%)d 4.46( 51.37%)f 2.54( 29.25%)g 0.00( 0.01%)  
( 88.70%) 0.9418\* N 39 s( 63.80%)p 0.57( 36.16%)d 0.00( 0.04%)

**Table ST1:** Computed Wiberg bond index and natural charges for **K<sub>2</sub>-2**, **K<sub>2</sub>-N<sub>2</sub>** and **K<sub>4</sub>-(N)<sub>2</sub>**

| Atom Label    | Wiberg bond index |                   |                                |                                |                                  |                                  | Natural charges   |                                |                                  |
|---------------|-------------------|-------------------|--------------------------------|--------------------------------|----------------------------------|----------------------------------|-------------------|--------------------------------|----------------------------------|
|               | K <sub>2</sub> -2 | K <sub>2</sub> -2 | K <sub>2</sub> -N <sub>2</sub> | K <sub>2</sub> -N <sub>2</sub> | K <sub>4</sub> -(N) <sub>2</sub> | K <sub>4</sub> -(N) <sub>2</sub> | K <sub>2</sub> -2 | K <sub>2</sub> -N <sub>2</sub> | K <sub>4</sub> -(N) <sub>2</sub> |
| U1            | 0.0000            | 0.1317            | 0.0000                         | 0.3864                         | 0.0000                           | 0.4015                           | 1.61924           | 1.56803                        | 1.18292                          |
| U2            | 0.1317            | 0.0000            | 0.3864                         | 0.0000                         | 0.4015                           | 0.0000                           | 1.63570           | 1.56878                        | 1.53497                          |
| O ( $\mu_2$ ) | 0.6055            | 0.7868            | 0.9966                         | 0.9879                         | 1.8185                           | 0.0211                           | -1.17306          | -0.76635                       | -0.73185                         |
| N1            |                   |                   | 1.0520                         | 0.8446                         | 1.4138                           | 1.3088                           |                   | -0.54552                       | -1.03536                         |
| N2            |                   |                   | 0.8421                         | 1.0544                         | 2.2841                           | 0.6111                           |                   | -0.54696                       | -0.73627                         |

**Table ST2:** Computed Wiberg bond index for **Rb<sub>2</sub>-2**, **Rb<sub>2</sub>-N<sub>2</sub>** and **Rb<sub>4</sub>-(N)<sub>2</sub>**

| Atom Label    | Wiberg bond index  |                    |                                 |                                 |                                   |          | Natural charges    |                                 |                                   |
|---------------|--------------------|--------------------|---------------------------------|---------------------------------|-----------------------------------|----------|--------------------|---------------------------------|-----------------------------------|
|               | Rb <sub>2</sub> -2 | Rb <sub>2</sub> -2 | Rb <sub>2</sub> -N <sub>2</sub> | Rb <sub>2</sub> -N <sub>2</sub> | Rb <sub>4</sub> -(N) <sub>2</sub> | U2ON2Rb4 | Rb <sub>2</sub> -2 | Rb <sub>2</sub> -N <sub>2</sub> | Rb <sub>4</sub> -(N) <sub>2</sub> |
| U1            | 0.0000             | 0.0216             | 0.0000                          | 0.0871                          | 0.0000                            | 0.0944   | 1.65808            | 1.58509                         | 1.18649                           |
| U2            | 0.0216             | 0.0000             | 0.0871                          | 0.0000                          | 0.0944                            | 0.0000   | 1.66459            | 1.58333                         | 1.52597                           |
| O ( $\mu_2$ ) | 0.1633             | 0.1687             | 0.2363                          | 0.2355                          | 0.4546                            | 0.0051   | -1.17262           | -0.77677                        | -0.73344                          |
| N1            |                    |                    | 0.2495                          | 0.2052                          | 0.3545                            | 0.3091   |                    | -0.55181                        | -1.03032                          |
| N2            |                    |                    | 0.2050                          | 0.2497                          | 0.5751                            | 0.1465   |                    | -0.55171                        | -0.73013                          |

**Table ST3:** Computed Wiberg bond index for **Cs<sub>2</sub>-2**, **Cs<sub>2</sub>-N<sub>2</sub>** and **Cs<sub>4</sub>-(N)<sub>2</sub>**

| Atom Label    | Wiberg bond index  |                    |                                 |                                 |                                   |                                   | Natural charges    |                                 |                                   |
|---------------|--------------------|--------------------|---------------------------------|---------------------------------|-----------------------------------|-----------------------------------|--------------------|---------------------------------|-----------------------------------|
|               | Cs <sub>2</sub> -2 | Cs <sub>2</sub> -2 | Cs <sub>2</sub> -N <sub>2</sub> | Cs <sub>2</sub> -N <sub>2</sub> | Cs <sub>4</sub> -(N) <sub>2</sub> | Cs <sub>4</sub> -(N) <sub>2</sub> | Cs <sub>2</sub> -2 | Cs <sub>2</sub> -N <sub>2</sub> | Cs <sub>4</sub> -(N) <sub>2</sub> |
| U1            | 0.0000             | 0.0230             | 0.0000                          | 0.0836                          | 0.0000                            | 0.0982                            | 1.58368            | 1.60269                         | 1.10202                           |
| U2            | 0.0230             | 0.0000             | 0.0836                          | 0.0000                          | 0.0982                            | 0.0000                            | 1.63980            | 1.62503                         | 1.43110                           |
| O ( $\mu_2$ ) | 0.1642             | 0.1666             | 0.2353                          | 0.2306                          | 0.0049                            | 0.1474                            | -1.17532           | -0.79451                        | -1.19414                          |
| N1            |                    |                    | 0.2463                          | 0.1986                          | 0.3473                            | 0.3125                            |                    | -0.55274                        | -1.08683                          |
| N2            |                    |                    | 0.2005                          | 0.2422                          | 0.5753                            | 0.1490                            |                    | -0.55672                        | -0.75886                          |

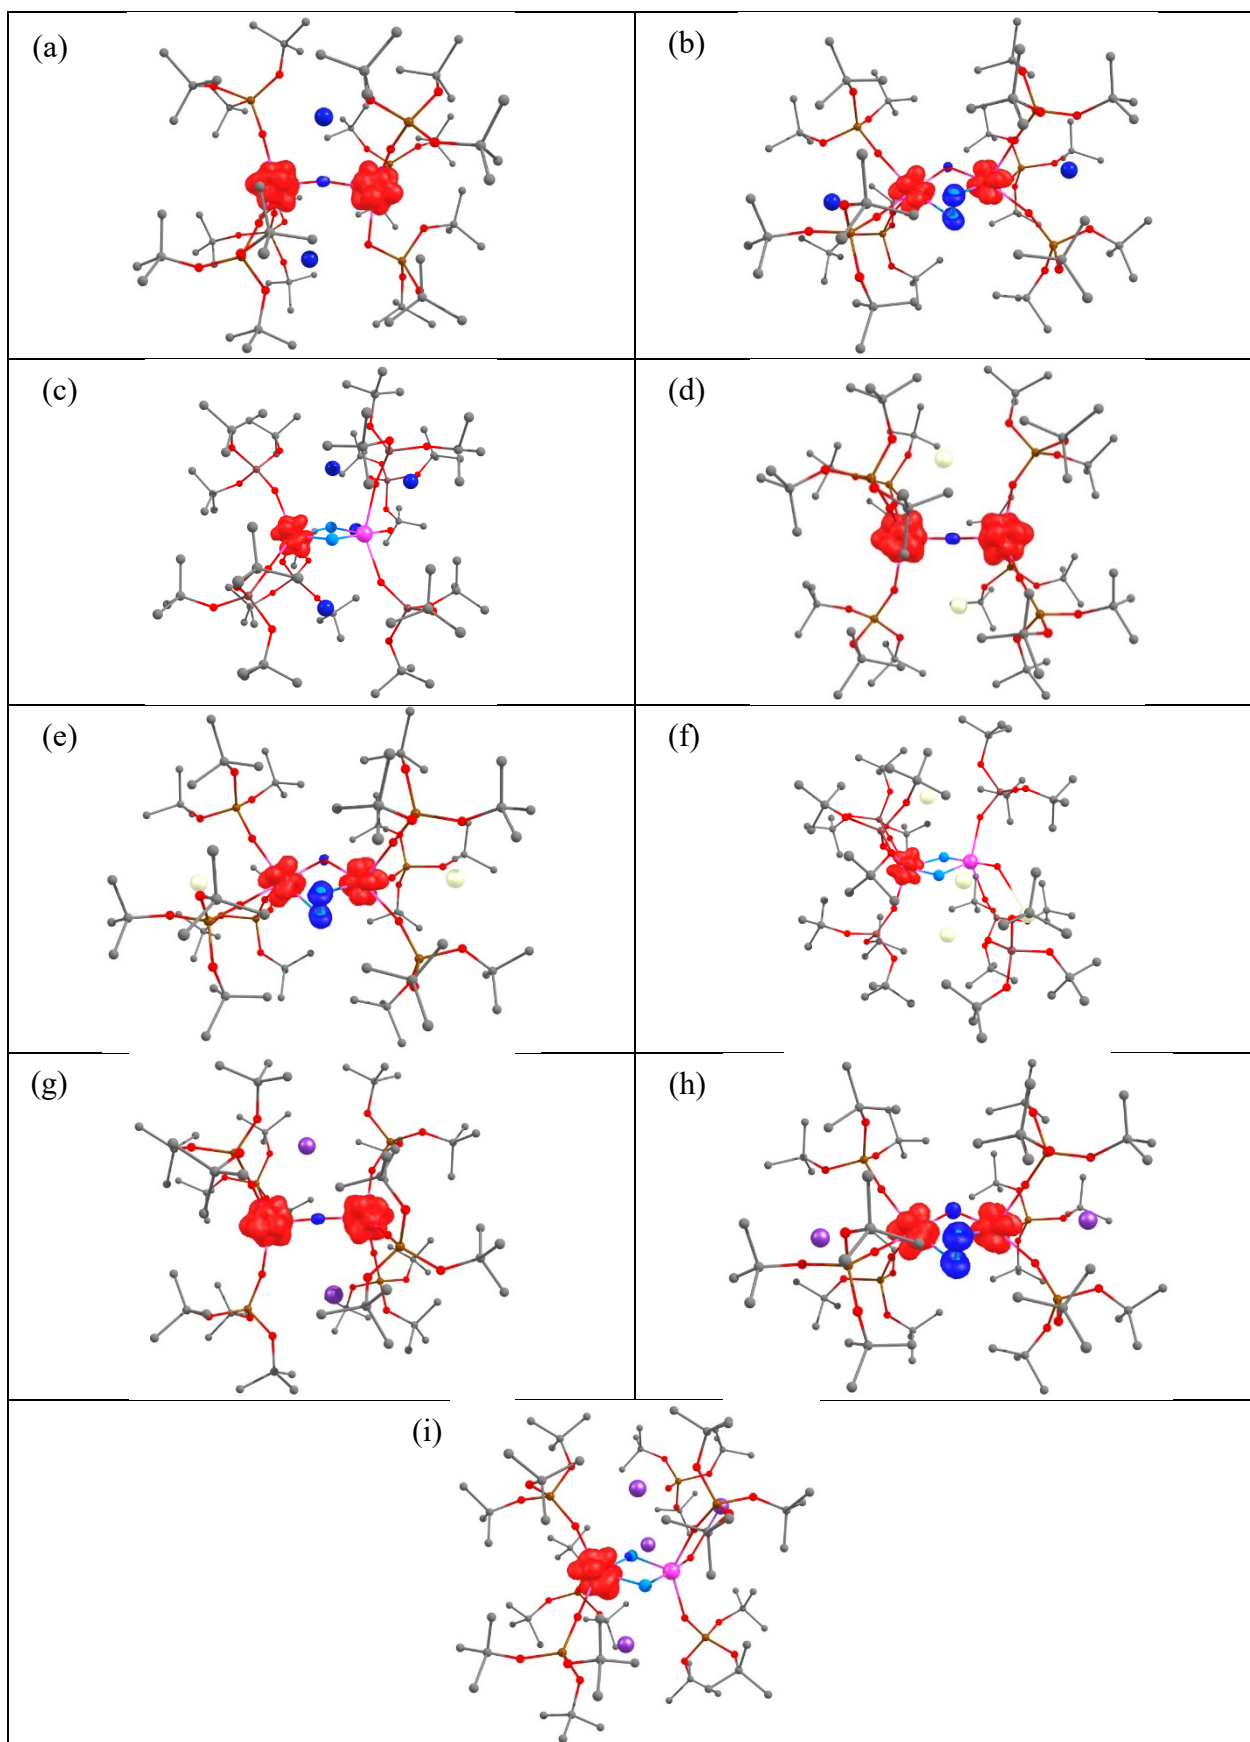

**Figure SF1:** Computed spin density plots for (a)  $\text{K}_2\text{-2}$ ,  $s=3$  (b)  $\text{K}_2\text{-N}_2$ ,  $s=1$  (c)  $\text{K}_4\text{-(N)}_2$ ,  $s=1$  (d)  $\text{Rb}_2\text{-2}$ ,  $s=3$  (e)  $\text{Rb}_2\text{-N}_2$ ,  $s=1$  (f)  $\text{Rb}_4\text{-(N)}_2$ ,  $s=1$  (g)  $\text{Cs}_2\text{-2}$ ,  $s=3$  (h)  $\text{Cs}_2\text{-N}_2$ ,  $s=1$  (i)  $\text{Cs}_4\text{-N}_2$ ,  $s=1$ .

**Table ST4:** DFT computed spin densities

| Atom Label          | Spin densities    |                                |                                  |                    |                                 |                                   |                    |                                 |                                   |
|---------------------|-------------------|--------------------------------|----------------------------------|--------------------|---------------------------------|-----------------------------------|--------------------|---------------------------------|-----------------------------------|
|                     | K <sub>2</sub> -2 | K <sub>2</sub> -N <sub>2</sub> | K <sub>4</sub> -(N) <sub>2</sub> | Rb <sub>2</sub> -2 | Rb <sub>2</sub> -N <sub>2</sub> | Rb <sub>4</sub> -(N) <sub>2</sub> | Cs <sub>2</sub> -2 | Cs <sub>2</sub> -N <sub>2</sub> | Cs <sub>4</sub> -(N) <sub>2</sub> |
| U1                  | 3.08              | 1.27                           | -0.01                            | 3.10               | 1.29                            | -0.01                             | 3.11               | 1.30                            | 0.00                              |
| U2                  | 3.10              | 1.27                           | 2.18                             | 3.10               | 1.29                            | 2.19                              | 3.10               | 1.32                            | 2.18                              |
| O (μ <sub>2</sub> ) | -0.09             | -0.08                          | 0.00                             | -0.09              | -0.08                           | 0.00                              | -0.09              | -0.08                           | 0.00                              |
| N1                  |                   | -0.18                          | -0.09                            |                    | -0.20                           | -0.09                             |                    | -0.23                           | -0.09                             |
| N2                  |                   | -0.18                          | -0.03                            |                    | -0.20                           | -0.03                             |                    | -0.23                           | -0.03                             |

**Table ST5:** DFT computed NBO second order perturbation analysis for K<sub>2</sub>-2, s=3 spin state

| Donor NBO                                                                                                                                                                                 | Acceptor NBO                                                                           | E(2)<br>kcal/mol |
|-------------------------------------------------------------------------------------------------------------------------------------------------------------------------------------------|----------------------------------------------------------------------------------------|------------------|
| BD ( 1) U 1 - O 32<br>( 6.17%) 0.2484* U 1<br>s( 0.27%)p16.98( 4.51%)d99.99( 68.53%)<br>f99.99( 26.68%)g 0.07( 0.02%)<br>( 93.83%) 0.9687* O 32 s( 1.84%)p53.35( 98.16%)d<br>0.00( 0.00%) | LP*( 4) U 2<br>s( 0.42%)p 3.06( 1.27%)d99.99( 87.52%) f25.94( 10.77%)g<br>0.06( 0.02%) | 13.81            |
| BD ( 2) U 1 - O 32<br>( 5.77%) 0.2401* U 1<br>s( 0.10%)p47.58( 4.99%)d99.99( 73.49%)<br>f99.99( 21.39%)g 0.24( 0.02%)<br>( 94.23%) 0.9707* O 32 s( 0.09%)p99.99( 99.90%)d<br>0.02( 0.00%) | LP*( 5) U 2<br>s( 0.56%)p 7.08( 3.97%)d99.99( 80.69%) f26.31( 14.77%)g<br>0.01( 0.01%) | 14.10            |
| LP ( 1) O 32<br>s( 45.90%)p 1.18( 54.10%)d 0.00( 0.00%)                                                                                                                                   | LP*( 4) U 1<br>s( 0.75%)p 2.77( 2.07%)d99.99( 77.35%) f26.53( 19.83%)g<br>0.01( 0.01%) | 35.78            |
| LP ( 2) O 32<br>s( 52.16%)p 0.92( 47.83%)d 0.00( 0.01%)                                                                                                                                   | LP*( 4) U 1<br>s( 0.75%)p 2.77( 2.07%)d99.99( 77.35%) f26.53( 19.83%)g<br>0.01( 0.01%) | 10.92            |
| LP ( 2) O 32<br>s( 52.16%)p 0.92( 47.83%)d 0.00( 0.01%)                                                                                                                                   | LP*( 3) U 2<br>s( 0.72%)p 7.41( 5.31%)d99.99( 76.78%) f24.02( 17.19%)g<br>0.01( 0.01%) | 13.67            |
| LP ( 2) O 32<br>s( 52.16%)p 0.92( 47.83%)d 0.00( 0.01%)                                                                                                                                   | LP*( 4) U 2<br>s( 0.42%)p 3.06( 1.27%)d99.99( 87.52%) f25.94( 10.77%)g<br>0.06( 0.02%) | 22.06            |



Table ST6: DFT computed NBO second order perturbation analysis for  $K_2-N_2$ ,  $s=1$  spin state

| Donor NBO                                                                                                                                                                                                                                                                                                               | Acceptor NBO                                                                                                                                     | E(2)<br>kcal/mol |
|-------------------------------------------------------------------------------------------------------------------------------------------------------------------------------------------------------------------------------------------------------------------------------------------------------------------------|--------------------------------------------------------------------------------------------------------------------------------------------------|------------------|
| <p><u>BD ( 2) U 1 - O 12</u><br/>                     ( 10.18%) 0.3191* U 1 s( 1.16%)p<br/>                     3.96( 4.59%)d30.35( 35.19%)f50.89( 59.00%)g<br/>                     0.06( 0.07%)<br/>                     ( 89.82%) 0.9477* O 12 s( 1.38%)p71.37( 98.57%)d<br/>                     0.03( 0.05%)</p>   | <p><u>LP*( 3) U 2</u><br/>                     s( 0.36%)p 0.78( 0.28%)d99.99( 57.18%)f99.99( 42.18%)g<br/>                     0.01( 0.00%)</p>  | 14.66            |
| <p><u>BD ( 3) U 1 - O 12</u><br/>                     ( 11.50%) 0.3391* U 1<br/>                     s( 0.17%)p21.03( 3.53%)d99.99( 43.18%)<br/>                     f99.99( 53.09%)g 0.17( 0.03%)<br/>                     ( 88.50%) 0.9408* O 12 s( 0.24%)p99.99( 99.71%)d<br/>                     0.19( 0.05%)</p>  | <p><u>LP*( 5) U 2</u><br/>                     s( 0.66%)p 0.64( 0.42%)d89.12( 59.07%)f60.11( 39.84%)g<br/>                     0.01( 0.01%)</p>  | 18.54            |
| <p><u>BD ( 2) U 1 - N 13</u><br/>                     ( 14.29%) 0.3780* U 1<br/>                     s( 0.47%)p11.62( 5.50%)d36.33( 17.20%)<br/>                     f99.99( 76.81%)g 0.04( 0.02%)<br/>                     ( 85.71%) 0.9258* N 13 s( 19.43%)p 4.14( 80.49%)d<br/>                     0.00( 0.08%)</p> | <p><u>LP*( 2) U 2</u><br/>                     s( 2.00%)p 0.79( 1.58%)d15.22( 30.46%)f32.95( 65.93%)g<br/>                     0.01( 0.03%)</p>  | 10.59            |
| <p><u>BD ( 1) U 1 - N 14</u><br/>                     ( 17.32%) 0.4161* U 1 s( 12.81%)p 0.74( 9.42%)d<br/>                     3.75( 47.97%)f 2.32( 29.77%)g 0.00( 0.02%)<br/>                     ( 82.68%) 0.9093* N 14 s( 37.95%)p 1.63( 62.00%)d<br/>                     0.00( 0.06%)</p>                          | <p><u>LP*( 6) U 2</u><br/>                     s( 45.44%)p 0.36( 16.23%)d 0.08( 3.53%)f 0.77( 34.77%)g<br/>                     0.00( 0.03%)</p> | 11.76            |
| <p><u>BD ( 1) U 2 - O 12</u><br/>                     ( 11.85%) 0.3442* U 2 s( 7.44%)p 0.77( 5.71%)d<br/>                     5.20( 38.64%)f 6.48( 48.18%)g 0.00( 0.03%)<br/>                     ( 88.15%) 0.9389* O 12 s( 55.10%)p 0.81( 44.88%)d<br/>                     0.00( 0.02%)</p>                           | <p><u>LP*( 8) U 1</u><br/>                     s( 0.09%)p99.99( 61.21%)d99.99( 16.40%)f99.99( 22.26%)g<br/>                     0.40( 0.04%)</p> | 10.30            |
| <p><u>BD ( 1) N 13 - N 14</u><br/>                     ( 50.00%) 0.7071* N 13 s( 21.47%)p 3.65( 78.34%)d<br/>                     0.01( 0.20%)<br/>                     ( 50.00%) 0.7071* N 14 s( 21.51%)p 3.64( 78.29%)d<br/>                     0.01( 0.20%)</p>                                                     | <p><u>LP*( 2) U 2</u><br/>                     s( 2.00%)p 0.79( 1.58%)d15.22( 30.46%)f32.95( 65.93%)g<br/>                     0.01( 0.03%)</p>  | 11.37            |
| <p><u>LP ( 1) N 13</u><br/>                     s( 12.10%)p 7.25( 87.78%)d 0.01( 0.11%)</p>                                                                                                                                                                                                                             | <p><u>LP*( 2) U 2</u><br/>                     s( 2.00%)p 0.79( 1.58%)d15.22( 30.46%)f32.95( 65.93%)g<br/>                     0.01( 0.03%)</p>  | 40.30            |

**Table ST7:** DFT computed NBO second order perturbation analysis for  $K_4-(N)_2$ ,  $s=1$  spin state

| Donor NBO                                                                                                                                                                                  | Acceptor NBO                                                                            | E(2)<br>kcal/mol |
|--------------------------------------------------------------------------------------------------------------------------------------------------------------------------------------------|-----------------------------------------------------------------------------------------|------------------|
| BD ( 3) U 1 - O 17<br>( 20.03%) 0.4476* U 1 s( 2.47%)p<br>0.43( 1.07%)d17.24( 42.65%)f21.66( 53.58%)g<br>0.09( 0.22%)<br>( 79.97%) 0.8943* O 17 s( 30.41%)p 2.29( 69.55%)d<br>0.00( 0.04%) | LP*( 4) U 2<br>s( 0.34%)p 5.25( 1.77%)d99.99( 69.40%)f84.78( 28.49%)g<br>0.03( 0.01%)   | 10.84            |
| BD ( 3) U 1 - O 17<br>( 20.03%) 0.4476* U 1 s( 2.47%)p<br>0.43( 1.07%)d17.24( 42.65%)f21.66( 53.58%)g<br>0.09( 0.22%)<br>( 79.97%) 0.8943* O 17 s( 30.41%)p 2.29( 69.55%)d<br>0.00( 0.04%) | LP*( 8) U 2<br>s( 28.52%)p 0.02( 0.59%)d 1.70( 48.46%) f 0.79( 22.42%)g<br>0.00( 0.01%) | 35.87            |
| BD ( 3) U 1 - O 17<br>( 20.03%) 0.4476* U 1 s( 2.47%)p<br>0.43( 1.07%)d17.24( 42.65%)f21.66( 53.58%)g<br>0.09( 0.22%)<br>( 79.97%) 0.8943* O 17 s( 30.41%)p 2.29( 69.55%)d<br>0.00( 0.04%) | LP*( 11) U 2<br>s( 1.26%)p12.20( 15.37%)d 5.75( 7.24%)f60.42( 76.10%)g<br>0.02( 0.03%)  | 560.78           |
| BD ( 1) U 1 - N 38<br>( 18.68%) 0.4322* U 1 s( 10.38%)p 0.76( 7.87%)d<br>5.09( 52.83%) f 2.78( 28.89%)g 0.00( 0.04%)<br>( 81.32%) 0.9018* N 38 s( 50.24%)p 0.99( 49.74%)d<br>0.00( 0.01%)  | LP*( 1) U 1<br>s( 1.24%)p 1.16( 1.45%)d45.77( 56.83%)f32.60( 40.47%)g<br>0.01( 0.01%)   | 37.73            |
| BD ( 1) U 1 - N 38<br>( 18.68%) 0.4322* U 1 s( 10.38%)p 0.76( 7.87%)d<br>5.09( 52.83%) f 2.78( 28.89%)g 0.00( 0.04%)<br>( 81.32%) 0.9018* N 38 s( 50.24%)p 0.99( 49.74%)d<br>0.00( 0.01%)  | LP*( 5) U 1<br>s( 0.75%)p 7.00( 5.22%)d53.06( 39.56%)f73.06( 54.47%)g<br>0.01( 0.01%)   | 95.62            |
| BD ( 1) U 1 - N 38<br>( 18.68%) 0.4322* U 1 s( 10.38%)p 0.76( 7.87%)d<br>5.09( 52.83%) f 2.78( 28.89%)g 0.00( 0.04%)<br>( 81.32%) 0.9018* N 38 s( 50.24%)p 0.99( 49.74%)d<br>0.00( 0.01%)  | LP*( 9) U 1<br>s( 0.06%)p59.51( 3.44%)d65.89( 3.81%)f99.99( 92.48%)g<br>3.45( 0.20%)    | 163.49           |
| BD ( 1) U 1 - N 38<br>( 18.68%) 0.4322* U 1 s( 10.38%)p 0.76( 7.87%)d<br>5.09( 52.83%) f 2.78( 28.89%)g 0.00( 0.04%)<br>( 81.32%) 0.9018* N 38 s( 50.24%)p 0.99( 49.74%)d<br>0.00( 0.01%)  | LP*( 3) U 2<br>s( 0.75%)p 3.57( 2.67%)d80.56( 60.24%)f48.59( 36.33%)g<br>0.02( 0.02%)   | 140.84           |
| BD ( 1) U 1 - N 38<br>( 18.68%) 0.4322* U 1 s( 10.38%)p 0.76( 7.87%)d<br>5.09( 52.83%) f 2.78( 28.89%)g 0.00( 0.04%)<br>( 81.32%) 0.9018* N 38 s( 50.24%)p 0.99( 49.74%)d<br>0.00( 0.01%)  | LP*( 4) U 2<br>s( 0.34%)p 5.25( 1.77%)d99.99( 69.40%)f84.78( 28.49%)g<br>0.03( 0.01%)   | 22.23            |
| BD ( 1) U 1 - N 38<br>( 18.68%) 0.4322* U 1 s( 10.38%)p 0.76( 7.87%)d<br>5.09( 52.83%) f 2.78( 28.89%)g 0.00( 0.04%)<br>( 81.32%) 0.9018* N 38 s( 50.24%)p 0.99( 49.74%)d<br>0.00( 0.01%)  | LP*( 7) U 2<br>s( 37.53%)p 0.03( 1.21%)d 0.54( 20.21%) f 1.09( 41.02%)g<br>0.00( 0.02%) | 113.58           |
| BD ( 1) U 1 - N 38<br>( 18.68%) 0.4322* U 1 s( 10.38%)p 0.76( 7.87%)d<br>5.09( 52.83%) f 2.78( 28.89%)g 0.00( 0.04%)<br>( 81.32%) 0.9018* N 38 s( 50.24%)p 0.99( 49.74%)d<br>0.00( 0.01%)  | LP*( 9) U 2<br>s( 0.13%)p99.99( 21.96%)d48.76( 6.10%)f99.99( 71.81%)g<br>0.05( 0.01%)   | 71.48            |
| BD ( 1) U 1 - N 38<br>( 18.68%) 0.4322* U 1 s( 10.38%)p 0.76( 7.87%)d<br>5.09( 52.83%) f 2.78( 28.89%)g 0.00( 0.04%)<br>( 81.32%) 0.9018* N 38 s( 50.24%)p 0.99( 49.74%)d<br>0.00( 0.01%)  | LP*( 11) U 2<br>s( 1.26%)p12.20( 15.37%)d 5.75( 7.24%)f60.42( 76.10%)g<br>0.02( 0.03%)  | 222.68           |
| BD ( 2) U 1 - N 39<br>( 27.75%) 0.5268* U 1<br>s( 0.03%)p99.99( 3.92%)d99.99( 46.32%)<br>f99.99( 49.66%)g 2.88( 0.07%)                                                                     | LP*( 4) U 2<br>s( 0.34%)p 5.25( 1.77%)d99.99( 69.40%)f84.78( 28.49%)g<br>0.03( 0.01%)   | 451.09           |

|                                                                                                                                                                                           |                                                                                          |         |
|-------------------------------------------------------------------------------------------------------------------------------------------------------------------------------------------|------------------------------------------------------------------------------------------|---------|
| ( 72.25%) 0.8500* N 39 s( 0.09%)p99.99( 99.78%)d<br>1.55( 0.14%)                                                                                                                          |                                                                                          |         |
| BD ( 1) U 2 - N 38<br>( 18.30%) 0.4277* U 2 s( 9.05%)p 0.18( 1.61%)d<br>4.38( 39.69%) f 5.48( 49.61%)g 0.00( 0.03%)<br>( 81.70%) 0.9039* N 38 s( 43.26%)p 1.31( 56.73%)d<br>0.00( 0.01%)  | LP*( 1) U 1<br>s( 1.24%)p 1.16( 1.45%)d45.77( 56.83%) f32.60( 40.47%)g<br>0.01( 0.01%)   | 36.79   |
| BD ( 1) U 2 - N 39<br>( 12.40%) 0.3521* U 2 s( 13.37%)p 0.54( 7.19%)d<br>3.75( 50.19%) f 2.19( 29.25%)g 0.00( 0.01%)<br>( 87.60%) 0.9359* N 39 s( 60.32%)p 0.66( 39.64%)d<br>0.00( 0.04%) | LP*( 2) U 1<br>s( 11.41%)p 2.09( 23.89%)d 0.40( 4.59%) f 5.26( 60.04%)g<br>0.01( 0.07%)  | 6021.46 |
| BD ( 1) U 2 - N 39<br>( 12.40%) 0.3521* U 2 s( 13.37%)p 0.54( 7.19%)d<br>3.75( 50.19%) f 2.19( 29.25%)g 0.00( 0.01%)<br>( 87.60%) 0.9359* N 39 s( 60.32%)p 0.66( 39.64%)d<br>0.00( 0.04%) | LP*( 5) U 1<br>s( 0.75%)p 7.00( 5.22%)d53.06( 39.56%) f73.06( 54.47%)g<br>0.01( 0.01%)   | 232.93  |
| BD ( 1) U 2 - N 39<br>( 12.40%) 0.3521* U 2 s( 13.37%)p 0.54( 7.19%)d<br>3.75( 50.19%) f 2.19( 29.25%)g 0.00( 0.01%)<br>( 87.60%) 0.9359* N 39 s( 60.32%)p 0.66( 39.64%)d<br>0.00( 0.04%) | LP*( 9) U 1<br>s( 0.06%)p59.51( 3.44%)d65.89( 3.81%)f99.99( 92.48%)g<br>3.45( 0.20%)     | 586.78  |
| BD ( 1) U 2 - N 39<br>( 12.40%) 0.3521* U 2 s( 13.37%)p 0.54( 7.19%)d<br>3.75( 50.19%) f 2.19( 29.25%)g 0.00( 0.01%)<br>( 87.60%) 0.9359* N 39 s( 60.32%)p 0.66( 39.64%)d<br>0.00( 0.04%) | LP*( 3) U 2<br>s( 0.75%)p 3.57( 2.67%)d80.56( 60.24%) f48.59( 36.33%)g<br>0.02( 0.02%)   | 119.39  |
| BD ( 1) U 2 - N 39<br>( 12.40%) 0.3521* U 2 s( 13.37%)p 0.54( 7.19%)d<br>3.75( 50.19%) f 2.19( 29.25%)g 0.00( 0.01%)<br>( 87.60%) 0.9359* N 39 s( 60.32%)p 0.66( 39.64%)d<br>0.00( 0.04%) | LP*( 5) U 2<br>s( 0.05%)p10.19( 0.46%)d99.99( 78.41%)f99.99( 21.07%)g<br>0.20( 0.01%)    | 355.39  |
| BD ( 1) U 2 - N 39<br>( 12.40%) 0.3521* U 2 s( 13.37%)p 0.54( 7.19%)d<br>3.75( 50.19%) f 2.19( 29.25%)g 0.00( 0.01%)<br>( 87.60%) 0.9359* N 39 s( 60.32%)p 0.66( 39.64%)d<br>0.00( 0.04%) | LP*( 6) U 2<br>s( 0.88%)p 2.10( 1.84%)d84.36( 73.87%) f26.72( 23.40%)g<br>0.01( 0.01%)   | 39.24   |
| BD ( 1) U 2 - N 39<br>( 12.40%) 0.3521* U 2 s( 13.37%)p 0.54( 7.19%)d<br>3.75( 50.19%) f 2.19( 29.25%)g 0.00( 0.01%)<br>( 87.60%) 0.9359* N 39 s( 60.32%)p 0.66( 39.64%)d<br>0.00( 0.04%) | LP*( 7) U 2<br>s( 37.53%)p 0.03( 1.21%)d 0.54( 20.21%) f 1.09( 41.02%)g<br>0.00( 0.02%)  | 609.38  |
| BD ( 1) U 2 - N 39<br>( 12.40%) 0.3521* U 2 s( 13.37%)p 0.54( 7.19%)d<br>3.75( 50.19%) f 2.19( 29.25%)g 0.00( 0.01%)<br>( 87.60%) 0.9359* N 39 s( 60.32%)p 0.66( 39.64%)d<br>0.00( 0.04%) | LP*( 8) U 2<br>s( 28.52%)p 0.02( 0.59%)d 1.70( 48.46%) f 0.79( 22.42%)g<br>0.00( 0.01%)  | 66.31   |
| BD ( 1) U 2 - N 39<br>( 12.40%) 0.3521* U 2 s( 13.37%)p 0.54( 7.19%)d<br>3.75( 50.19%) f 2.19( 29.25%)g 0.00( 0.01%)<br>( 87.60%) 0.9359* N 39 s( 60.32%)p 0.66( 39.64%)d<br>0.00( 0.04%) | LP*( 9) U 2<br>s( 0.13%)p99.99( 21.96%)d48.76( 6.10%) f99.99( 71.81%)g<br>0.05( 0.01%)   | 50.71   |
| BD ( 1) U 2 - N 39<br>( 12.40%) 0.3521* U 2 s( 13.37%)p 0.54( 7.19%)d<br>3.75( 50.19%) f 2.19( 29.25%)g 0.00( 0.01%)<br>( 87.60%) 0.9359* N 39 s( 60.32%)p 0.66( 39.64%)d<br>0.00( 0.04%) | LP*( 10) U 2<br>s( 0.03%)p99.99( 20.29%)d99.99( 28.74%) f99.99( 50.92%)g<br>0.70( 0.02%) | 933.92  |
| LP ( 1) O 17<br>s( 66.87%)p 0.50( 33.13%)d 0.00( 0.00%)                                                                                                                                   | LP*( 9) U 1<br>s( 0.06%)p59.51( 3.44%)d65.89( 3.81%)f99.99( 92.48%)g<br>3.45( 0.20%)     | 68.89   |

|                                                                                                                                                                                           |                                                                                         |        |
|-------------------------------------------------------------------------------------------------------------------------------------------------------------------------------------------|-----------------------------------------------------------------------------------------|--------|
| LP ( 1) O 17<br>s( 66.87%)p 0.50( 33.13%)d 0.00( 0.00%)                                                                                                                                   | LP*( 3) U 2<br>s( 0.75%)p 3.57( 2.67%)d80.56( 60.24%)f48.59( 36.33%)g<br>0.02( 0.02%)   | 19.97  |
| LP ( 1) O 17<br>s( 66.87%)p 0.50( 33.13%)d 0.00( 0.00%)                                                                                                                                   | LP*( 5) U 2<br>s( 0.05%)p10.19( 0.46%)d99.99( 78.41%)f99.99( 21.07%)g<br>0.20( 0.01%)   | 44.40  |
| LP ( 1) O 17<br>s( 66.87%)p 0.50( 33.13%)d 0.00( 0.00%)                                                                                                                                   | LP*( 7) U 2<br>s( 37.53%)p 0.03( 1.21%)d 0.54( 20.21%) f 1.09( 41.02%)g<br>0.00( 0.02%) | 10.34  |
| LP ( 1) O 17<br>s( 66.87%)p 0.50( 33.13%)d 0.00( 0.00%)                                                                                                                                   | LP*( 11) U 2<br>s( 1.26%)p12.20( 15.37%)d 5.75( 7.24%) f60.42( 76.10%)g<br>0.02( 0.03%) | 31.43  |
| LP ( 1) N 38<br>s( 6.20%)p15.14( 93.77%)d 0.01( 0.04%)                                                                                                                                    | LP*( 1) U 1<br>s( 1.24%)p 1.16( 1.45%)d45.77( 56.83%)f32.60( 40.47%)g<br>0.01( 0.01%)   | 70.11  |
| LP ( 2) N 38<br>s( 0.28%)p99.99( 99.68%)d 0.15( 0.04%)                                                                                                                                    | LP*( 1) U 1<br>s( 1.24%)p 1.16( 1.45%)d45.77( 56.83%)f32.60( 40.47%)g<br>0.01( 0.01%)   | 145.05 |
| LP ( 1) O 17<br>s( 66.87%)p 0.50( 33.13%)d 0.00( 0.00%)                                                                                                                                   | LP*( 9) K 5<br>s( 0.16%)p36.79( 5.92%)d99.99( 93.92%)                                   | 94.87  |
| LP ( 1) O 17<br>s( 66.87%)p 0.50( 33.13%)d 0.00( 0.00%)                                                                                                                                   | LP*( 4) K 6<br>s( 64.59%)p 0.55( 35.28%)d 0.00( 0.13%)                                  | 24.04  |
| BD ( 1) U 1 - N 38<br>( 18.68%) 0.4322* U 1 s( 10.38%)p 0.76( 7.87%)d<br>5.09( 52.83%) f 2.78( 28.89%)g 0.00( 0.04%)<br>( 81.32%) 0.9018* N 38 s( 50.24%)p 0.99( 49.74%)d<br>0.00( 0.01%) | LP*( 4) K 4<br>s( 59.10%)p 0.69( 40.79%)d 0.00( 0.11%)                                  | 658.27 |
| BD ( 1) U 2 - N 39<br>( 12.40%) 0.3521* U 2 s( 13.37%)p 0.54( 7.19%)d<br>3.75( 50.19%) f 2.19( 29.25%)g 0.00( 0.01%)<br>( 87.60%) 0.9359* N 39 s( 60.32%)p 0.66( 39.64%)d<br>0.00( 0.04%) | LP*( 4) K 4<br>s( 59.10%)p 0.69( 40.79%)d 0.00( 0.11%)                                  | 41.48  |
| BD ( 1) U 1 - N 38<br>( 18.68%) 0.4322* U 1 s( 10.38%)p 0.76( 7.87%)d<br>5.09( 52.83%) f 2.78( 28.89%)g 0.00( 0.04%)<br>( 81.32%) 0.9018* N 38 s( 50.24%)p 0.99( 49.74%)d<br>0.00( 0.01%) | LP*( 4) K 5<br>s( 62.34%)p 0.60( 37.16%)d 0.01( 0.49%)                                  | 29.69  |
| BD ( 1) U 1 - N 38<br>( 18.68%) 0.4322* U 1 s( 10.38%)p 0.76( 7.87%)d<br>5.09( 52.83%) f 2.78( 28.89%)g 0.00( 0.04%)<br>( 81.32%) 0.9018* N 38 s( 50.24%)p 0.99( 49.74%)d<br>0.00( 0.01%) | LP*( 9) K 5<br>s( 0.16%)p36.79( 5.92%)d99.99( 93.92%)                                   | 442.69 |
| BD ( 1) U 2 - N 39<br>( 12.40%) 0.3521* U 2 s( 13.37%)p 0.54( 7.19%)d<br>3.75( 50.19%) f 2.19( 29.25%)g 0.00( 0.01%)<br>( 87.60%) 0.9359* N 39 s( 60.32%)p 0.66( 39.64%)d<br>0.00( 0.04%) | LP*( 4) K 5<br>s( 62.34%)p 0.60( 37.16%)d 0.01( 0.49%)                                  | 52.42  |
| BD ( 1) U 2 - N 39<br>( 12.40%) 0.3521* U 2 s( 13.37%)p 0.54( 7.19%)d<br>3.75( 50.19%) f 2.19( 29.25%)g 0.00( 0.01%)<br>( 87.60%) 0.9359* N 39 s( 60.32%)p 0.66( 39.64%)d<br>0.00( 0.04%) | LP*( 9) K 5<br>s( 0.16%)p36.79( 5.92%)d99.99( 93.92%)                                   | 190.85 |

|                                                                                                                                                                                            |                                                        |         |
|--------------------------------------------------------------------------------------------------------------------------------------------------------------------------------------------|--------------------------------------------------------|---------|
| BD ( 1) U 1 - N 38<br>( 18.68%) 0.4322* U 1 s( 10.38%)p 0.76( 7.87%)d<br>5.09( 52.83%) f 2.78( 28.89%)g 0.00( 0.04%)<br>( 81.32%) 0.9018* N 38 s( 50.24%)p 0.99( 49.74%)d<br>0.00( 0.01%)  | LP*( 4) K 6<br>s( 64.59%)p 0.55( 35.28%)d 0.00( 0.13%) | 2004.94 |
| BD ( 1) U 1 - N 38<br>( 18.68%) 0.4322* U 1 s( 10.38%)p 0.76( 7.87%)d<br>5.09( 52.83%) f 2.78( 28.89%)g 0.00( 0.04%)<br>( 81.32%) 0.9018* N 38 s( 50.24%)p 0.99( 49.74%)d<br>0.00( 0.01%)  | LP*( 6) K 6<br>s( 0.53%)p 1.58( 0.83%)d99.99( 98.64%)  | 34.08   |
| BD ( 1) U 1 - N 38<br>( 18.68%) 0.4322* U 1 s( 10.38%)p 0.76( 7.87%)d<br>5.09( 52.83%) f 2.78( 28.89%)g 0.00( 0.04%)<br>( 81.32%) 0.9018* N 38 s( 50.24%)p 0.99( 49.74%)d<br>0.00( 0.01%)  | LP*( 7) K 6<br>s( 0.39%)p 8.48( 3.28%)d99.99( 96.33%)  | 62.66   |
| BD ( 2) U 1 - N 39<br>( 27.75%) 0.5268* U 1<br>s( 0.03%)p99.99( 3.92%)d99.99( 46.32%)<br>f99.99( 49.66%)g 2.88( 0.07%)<br>( 72.25%) 0.8500* N 39 s( 0.09%)p99.99( 99.78%)d<br>1.55( 0.14%) | LP*( 6) K 6<br>s( 0.53%)p 1.58( 0.83%)d99.99( 98.64%)  | 143.93  |
| BD ( 1) U 2 - N 39<br>( 12.40%) 0.3521* U 2 s( 13.37%)p 0.54( 7.19%)d<br>3.75( 50.19%) f 2.19( 29.25%)g 0.00( 0.01%)<br>( 87.60%) 0.9359* N 39 s( 60.32%)p 0.66( 39.64%)d<br>0.00( 0.04%)  | LP*( 4) K 6<br>s( 64.59%)p 0.55( 35.28%)d 0.00( 0.13%) | 137.27  |
| BD ( 1) U 2 - N 39<br>( 12.40%) 0.3521* U 2 s( 13.37%)p 0.54( 7.19%)d<br>3.75( 50.19%) f 2.19( 29.25%)g 0.00( 0.01%)<br>( 87.60%) 0.9359* N 39 s( 60.32%)p 0.66( 39.64%)d<br>0.00( 0.04%)  | LP*( 5) K 6<br>s( 1.24%)p 0.99( 1.23%)d78.35( 97.52%)  | 62.33   |

**Table S78:** DFT computed NBO second order perturbation analysis for **Rb<sub>2</sub>-2**, s=3 spin state

| Donor NBO                                                                                                                                                                                 | Acceptor NBO                                                                           | E(2)<br>kcal/mol |
|-------------------------------------------------------------------------------------------------------------------------------------------------------------------------------------------|----------------------------------------------------------------------------------------|------------------|
| LP( 1) O 35<br>s( 96.83%)p 0.03( 3.16%)d 0.00( 0.01%)                                                                                                                                     | LP*( 4) U 1<br>s( 0.88%)p 3.40( 2.99%)d91.70( 80.83%) f17.32( 15.27%)g<br>0.02( 0.02%) | 28.55            |
| BD ( 1) U 1 - O 35<br>( 9.78%) 0.3128* U 1 s( 0.69%)p<br>3.00( 2.07%)d65.60( 45.37%) f74.96( 51.85%)g<br>0.02( 0.02%)<br>( 90.22%) 0.9498* O 35 s( 0.17%)p99.99( 99.83%)d<br>0.00( 0.00%) | LP*( 4) U 2<br>s( 0.90%)p 4.20( 3.80%)d93.26( 84.38%) f12.05( 10.90%)g<br>0.02( 0.02%) | 6.16             |
| LP( 1) O 35<br>s( 96.83%)p 0.03( 3.16%)d 0.00( 0.01%)                                                                                                                                     | LP*( 4) U 2<br>s( 0.90%)p 4.20( 3.80%)d93.26( 84.38%) f12.05( 10.90%)g<br>0.02( 0.02%) | 13.17            |
| LP( 2) O 35<br>s( 2.37%)p41.19( 97.63%)d 0.00( 0.00%)                                                                                                                                     | LP*( 3) U 2<br>s( 2.41%)p 4.10( 9.89%)d31.96( 77.13%) f 4.37( 10.55%)g<br>0.01( 0.01%) | 9.59             |

**Table ST9:** DFT computed NBO second order perturbation analysis for **Rb<sub>2</sub>-N<sub>2</sub>**, s=1 spin state

| Donor NBO                                                                                                                                                                                                      | Acceptor NBO                                                                                           | E(2)<br>kcal/mol |
|----------------------------------------------------------------------------------------------------------------------------------------------------------------------------------------------------------------|--------------------------------------------------------------------------------------------------------|------------------|
| <p><u>BD ( 2) U 1 - O 11</u><br/>( 10.07%) 0.3174* U 1 s( 1.25%)p<br/>3.81( 4.76%)d28.11( 35.19%)f46.91( 58.73%)g<br/>0.05( 0.07%)<br/>( 89.93%) 0.9483* O 11 s( 1.28%)p77.27( 98.68%)d<br/>0.04( 0.05%)</p>   | <p><u>LP*( 3) U 2</u><br/>s( 0.24%)p 1.65( 0.40%)d99.99( 60.30%)f99.99( 39.05%)g<br/>0.01( 0.00%)</p>  | 14.96            |
| <p><u>BD ( 3) U 1 - O 11</u><br/>( 11.45%) 0.3383* U 1<br/>s( 0.18%)p18.89( 3.42%)d99.99( 42.96%)<br/>f99.99( 53.40%)g 0.16( 0.03%)<br/>( 88.55%) 0.9410* O 11 s( 0.18%)p99.99( 99.77%)d<br/>0.25( 0.05%)</p>  | <p><u>LP*( 5) U 2</u><br/>s( 0.68%)p 0.50( 0.34%)d84.28( 57.36%)f61.14( 41.61%)g<br/>0.01( 0.01%)</p>  | 19.52            |
| <p><u>BD ( 2) U 1 - N 36</u><br/>( 14.44%) 0.3800* U 1<br/>s( 0.38%)p14.51( 5.55%)d44.80( 17.15%)<br/>f99.99( 76.90%)g 0.04( 0.02%)<br/>( 85.56%) 0.9250* N 36 s( 20.03%)p 3.99( 79.89%)d<br/>0.00( 0.08%)</p> | <p><u>LP*( 2) U 2</u><br/>s( 1.60%)p 1.11( 1.78%)d19.66( 31.48%)f40.66( 65.11%)g<br/>0.02( 0.03%)</p>  | 10.71            |
| <p><u>BD ( 1) U 1 - N 37</u><br/>( 17.29%) 0.4159* U 1 s( 12.10%)p 0.75( 9.08%)d<br/>4.06( 49.11%)f 2.45( 29.69%)g 0.00( 0.02%)<br/>( 82.71%) 0.9094* N 37 s( 37.39%)p 1.67( 62.55%)d<br/>0.00( 0.06%)</p>     | <p><u>LP*( 6) U 2</u><br/>s( 42.96%)p 0.44( 18.69%)d 0.15( 6.38%)f 0.74( 31.95%)g<br/>0.00( 0.02%)</p> | 12.04            |
| <p><u>BD ( 1) U 2 - O 11</u><br/>( 11.69%) 0.3419* U 2 s( 7.11%)p 0.74( 5.27%)d<br/>5.46( 38.78%)f 6.87( 48.80%)g 0.00( 0.03%)<br/>( 88.31%) 0.9397* O 11 s( 55.18%)p 0.81( 44.80%)d<br/>0.00( 0.02%)</p>      | <p><u>LP*( 8) U 1</u><br/>s( 0.07%)p99.99( 59.45%)d99.99( 16.50%)f99.99( 23.95%)g<br/>0.47( 0.03%)</p> | 9.43             |
| <p><u>BD ( 1) N 36 - N 37</u><br/>( 50.03%) 0.7073* N 36 s( 22.17%)p 3.50( 77.64%)d<br/>0.01( 0.19%)<br/>( 49.97%) 0.7069* N 37 s( 22.11%)p 3.51( 77.69%)d<br/>0.01( 0.20%)</p>                                | <p><u>LP*( 2) U 2</u><br/>s( 1.60%)p 1.11( 1.78%)d19.66( 31.48%)f40.66( 65.11%)g<br/>0.02( 0.03%)</p>  | 11.00            |
| <p>LP ( 1) N 36<br/>s( 11.11%)p 7.99( 88.77%)d 0.01( 0.12%)</p>                                                                                                                                                | <p><u>LP*( 2) U 2</u><br/>s( 1.60%)p 1.11( 1.78%)d19.66( 31.48%)f40.66( 65.11%)g<br/>0.02( 0.03%)</p>  | 38.77            |

**Table ST10:** DFT computed NBO second order perturbation analysis for **Rb<sub>4</sub>-(N)<sub>2</sub>**, s=1 spin state

| Donor NBO                                                                                                                                                                                                     | Acceptor NBO                                                                                          | E(2)<br>kcal/mol |
|---------------------------------------------------------------------------------------------------------------------------------------------------------------------------------------------------------------|-------------------------------------------------------------------------------------------------------|------------------|
| <p><u>BD ( 3) U 1 - O 17</u><br/>( 19.84%) 0.4454* U 1 s( 1.76%)p<br/>0.72( 1.27%)d24.17( 42.60%)f30.73( 54.17%)g<br/>0.11( 0.19%)<br/>( 80.16%) 0.8953* O 17 s( 25.75%)p 2.88( 74.20%)d<br/>0.00( 0.04%)</p> | <p><u>LP*( 4) U 2</u><br/>s( 0.36%)p 4.73( 1.71%)d99.99( 69.14%)f79.38( 28.77%)g<br/>0.03( 0.01%)</p> | 52.84            |
| <p><u>BD ( 3) U 1 - O 17</u><br/>( 19.84%) 0.4454* U 1 s( 1.76%)p<br/>0.72( 1.27%)d24.17( 42.60%)f30.73( 54.17%)g<br/>0.11( 0.19%)<br/>( 80.16%) 0.8953* O 17 s( 25.75%)p 2.88( 74.20%)d<br/>0.00( 0.04%)</p> | <p><u>LP*( 6) U 2</u><br/>s( 1.21%)p 1.81( 2.20%)d65.55( 79.59%)f13.99( 16.99%)g<br/>0.00( 0.01%)</p> | 118.34           |
| <p><u>BD ( 1) U 1 - N 38</u><br/>( 18.42%) 0.4292* U 1 s( 9.33%)p 0.79( 7.34%)d<br/>5.82( 54.26%)f 3.11( 29.03%)g 0.00( 0.04%)<br/>( 81.58%) 0.9032* N 38 s( 50.74%)p 0.97( 49.25%)d<br/>0.00( 0.01%)</p>     | <p><u>LP*( 1) U 1</u><br/>s( 1.19%)p 1.30( 1.55%)d48.63( 57.69%)f33.35( 39.57%)g<br/>0.01( 0.01%)</p> | 20.83            |
| <p><u>BD ( 1) U 1 - N 38</u><br/>( 18.42%) 0.4292* U 1 s( 9.33%)p 0.79( 7.34%)d<br/>5.82( 54.26%)f 3.11( 29.03%)g 0.00( 0.04%)</p>                                                                            | <p><u>LP*( 5) U 1</u><br/>s( 0.66%)p 6.70( 4.42%)d59.58( 39.26%)f84.46( 55.66%)g<br/>0.01( 0.01%)</p> | 115.79           |

|                                                                                                                                                                                         |                                                                                      |        |
|-----------------------------------------------------------------------------------------------------------------------------------------------------------------------------------------|--------------------------------------------------------------------------------------|--------|
| ( 81.58%) 0.9032* N 38 s( 50.74%)p 0.97( 49.25%)d 0.00( 0.01%)                                                                                                                          |                                                                                      |        |
| BD ( 1) U 1 - N 38<br>( 18.42%) 0.4292* U 1 s( 9.33%)p 0.79( 7.34%)d 5.82( 54.26%) f 3.11( 29.03%)g 0.00( 0.04%)<br>( 81.58%) 0.9032* N 38 s( 50.74%)p 0.97( 49.25%)d 0.00( 0.01%)      | LP*( 9) U 1<br>s( 0.20%)p22.66( 4.50%)d22.37( 4.44%) f99.99( 90.65%)g 1.07( 0.21%)   | 243.94 |
| BD ( 1) U 1 - N 38<br>( 18.42%) 0.4292* U 1 s( 9.33%)p 0.79( 7.34%)d 5.82( 54.26%) f 3.11( 29.03%)g 0.00( 0.04%)<br>( 81.58%) 0.9032* N 38 s( 50.74%)p 0.97( 49.25%)d 0.00( 0.01%)      | LP*( 3) U 2<br>s( 0.68%)p 4.14( 2.81%)d87.93( 59.67%) f54.26( 36.82%)g 0.03( 0.02%)  | 363.17 |
| BD ( 1) U 1 - N 38<br>( 18.42%) 0.4292* U 1 s( 9.33%)p 0.79( 7.34%)d 5.82( 54.26%) f 3.11( 29.03%)g 0.00( 0.04%)<br>( 81.58%) 0.9032* N 38 s( 50.74%)p 0.97( 49.25%)d 0.00( 0.01%)      | LP*( 4) U 2<br>s( 0.36%)p 4.73( 1.71%)d99.99( 69.14%) f79.38( 28.77%)g 0.03( 0.01%)  | 32.61  |
| BD ( 1) U 1 - N 38<br>( 18.42%) 0.4292* U 1 s( 9.33%)p 0.79( 7.34%)d 5.82( 54.26%) f 3.11( 29.03%)g 0.00( 0.04%)<br>( 81.58%) 0.9032* N 38 s( 50.74%)p 0.97( 49.25%)d 0.00( 0.01%)      | LP*( 9) U 2<br>s( 0.14%)p99.99( 22.66%)d40.40( 5.83%) f99.99( 71.35%)g 0.05( 0.01%)  | 31.42  |
| BD ( 1) U 1 - N 38<br>( 18.42%) 0.4292* U 1 s( 9.33%)p 0.79( 7.34%)d 5.82( 54.26%) f 3.11( 29.03%)g 0.00( 0.04%)<br>( 81.58%) 0.9032* N 38 s( 50.74%)p 0.97( 49.25%)d 0.00( 0.01%)      | LP*( 11) U 2<br>s( 1.04%)p28.69( 29.74%)d 7.30( 7.57%) f59.44( 61.62%)g 0.03( 0.03%) | 155.42 |
| BD ( 2) U 1 - N 39<br>( 27.80%) 0.5273* U 1<br>s( 0.05%)p75.34( 4.05%)d99.99( 46.20%)<br>f99.99( 49.62%)g 1.36( 0.07%)<br>( 72.20%) 0.8497* N 39 s( 0.07%)p99.99( 99.79%)d 2.04( 0.14%) | LP*( 1) U 1<br>s( 1.19%)p 1.30( 1.55%)d48.63( 57.69%) f33.35( 39.57%)g 0.01( 0.01%)  | 30.17  |
| BD ( 3) U 1 - N 39<br>( 29.15%) 0.5399* U 1<br>s( 0.05%)p25.84( 1.20%)d99.99( 48.07%)<br>f99.99( 50.64%)g 0.90( 0.04%)<br>( 70.85%) 0.8417* N 39 s( 0.02%)p99.99( 99.84%)d 6.11( 0.14%) | LP*( 1) U 1<br>s( 1.19%)p 1.30( 1.55%)d48.63( 57.69%) f33.35( 39.57%)g 0.01( 0.01%)  | 15.15  |
| BD ( 1) U 2 - N 39<br>( 12.24%) 0.3498* U 2 s( 12.85%)p 0.55( 7.02%)d 3.96( 50.86%) f 2.28( 29.26%)g 0.00( 0.01%)<br>( 87.76%) 0.9368* N 39 s( 60.96%)p 0.64( 39.00%)d 0.00( 0.04%)     | LP*( 5) U 1<br>s( 0.66%)p 6.70( 4.42%)d59.58( 39.26%) f84.46( 55.66%)g 0.01( 0.01%)  | 188.75 |
| BD ( 1) U 2 - N 39<br>( 12.24%) 0.3498* U 2 s( 12.85%)p 0.55( 7.02%)d 3.96( 50.86%) f 2.28( 29.26%)g 0.00( 0.01%)<br>( 87.76%) 0.9368* N 39 s( 60.96%)p 0.64( 39.00%)d 0.00( 0.04%)     | LP*( 9) U 1<br>s( 0.20%)p22.66( 4.50%)d22.37( 4.44%) f99.99( 90.65%)g 1.07( 0.21%)   | 279.76 |
| BD ( 1) U 2 - N 39<br>( 12.24%) 0.3498* U 2 s( 12.85%)p 0.55( 7.02%)d 3.96( 50.86%) f 2.28( 29.26%)g 0.00( 0.01%)<br>( 87.76%) 0.9368* N 39 s( 60.96%)p 0.64( 39.00%)d 0.00( 0.04%)     | LP*( 3) U 2<br>s( 0.68%)p 4.14( 2.81%)d87.93( 59.67%) f54.26( 36.82%)g 0.03( 0.02%)  | 123.82 |
| BD ( 1) U 2 - N 39<br>( 12.24%) 0.3498* U 2 s( 12.85%)p 0.55( 7.02%)d 3.96( 50.86%) f 2.28( 29.26%)g 0.00( 0.01%)<br>( 87.76%) 0.9368* N 39 s( 60.96%)p 0.64( 39.00%)d 0.00( 0.04%)     | LP*( 5) U 2<br>s( 0.12%)p 5.37( 0.63%)d99.99( 72.55%) f99.99( 26.69%)g 0.07( 0.01%)  | 385.19 |
| BD ( 1) U 2 - N 39<br>( 12.24%) 0.3498* U 2 s( 12.85%)p 0.55( 7.02%)d 3.96( 50.86%) f 2.28( 29.26%)g 0.00( 0.01%)<br>( 87.76%) 0.9368* N 39 s( 60.96%)p 0.64( 39.00%)d 0.00( 0.04%)     | LP*( 6) U 2<br>s( 1.21%)p 1.81( 2.20%)d65.55( 79.59%) f13.99( 16.99%)g 0.00( 0.01%)  | 25.67  |

|                                                                                                                                                                                                   |                                                                                                 |         |
|---------------------------------------------------------------------------------------------------------------------------------------------------------------------------------------------------|-------------------------------------------------------------------------------------------------|---------|
| <u>BD ( 1) U 2 - N 39</u><br>( 12.24%) 0.3498* U 2 s( 12.85%)p 0.55( 7.02%)d<br>3.96( 50.86%) f 2.28( 29.26%)g 0.00( 0.01%)<br>( 87.76%) 0.9368* N 39 s( 60.96%)p 0.64( 39.00%)d<br>0.00( 0.04%)  | <u>LP*( 7) U 2</u><br>s( 35.83%)p 0.04( 1.52%)d 0.61( 21.82%) f 1.14( 40.81%)g<br>0.00( 0.01%)  | 1629.09 |
| <u>BD ( 1) U 2 - N 39</u><br>( 12.24%) 0.3498* U 2 s( 12.85%)p 0.55( 7.02%)d<br>3.96( 50.86%) f 2.28( 29.26%)g 0.00( 0.01%)<br>( 87.76%) 0.9368* N 39 s( 60.96%)p 0.64( 39.00%)d<br>0.00( 0.04%)  | <u>LP*( 8) U 2</u><br>s( 31.61%)p 0.01( 0.45%)d 1.51( 47.87%) f 0.63( 20.05%)g<br>0.00( 0.01%)  | 748.26  |
| <u>BD ( 1) U 2 - N 39</u><br>( 12.24%) 0.3498* U 2 s( 12.85%)p 0.55( 7.02%)d<br>3.96( 50.86%) f 2.28( 29.26%)g 0.00( 0.01%)<br>( 87.76%) 0.9368* N 39 s( 60.96%)p 0.64( 39.00%)d<br>0.00( 0.04%)  | <u>LP*( 9) U 2</u><br>s( 0.14%)p99.99( 22.66%)d40.40( 5.83%) f99.99( 71.35%)g<br>0.05( 0.01%)   | 15.95   |
| <u>BD ( 1) U 2 - N 39</u><br>( 12.24%) 0.3498* U 2 s( 12.85%)p 0.55( 7.02%)d<br>3.96( 50.86%) f 2.28( 29.26%)g 0.00( 0.01%)<br>( 87.76%) 0.9368* N 39 s( 60.96%)p 0.64( 39.00%)d<br>0.00( 0.04%)  | <u>LP*( 10) U 2</u><br>s( 0.01%)p 1.00( 18.20%)d 1.60( 29.12%) f 2.89( 52.65%)g<br>0.00( 0.02%) | 259.10  |
| <u>LP ( 1) N 38</u><br>s( 6.00%)p15.66( 93.96%)d 0.01( 0.04%)                                                                                                                                     | <u>LP*( 1) U 1</u><br>s( 1.19%)p 1.30( 1.55%)d48.63( 57.69%) f33.35( 39.57%)g<br>0.01( 0.01%)   | 16.99   |
| <u>LP ( 2) N 38</u><br>s( 0.35%)p99.99( 99.60%)d 0.12( 0.04%)                                                                                                                                     | <u>LP*( 1) U 1</u><br>s( 1.19%)p 1.30( 1.55%)d48.63( 57.69%) f33.35( 39.57%)g<br>0.01( 0.01%)   | 154.86  |
| <u>BD ( 1) U 1 - O 17</u><br>( 18.19%) 0.4265* U 1 s( 0.01%)p<br>1.00( 1.36%)d36.10( 49.03%)f36.45( 49.51%)g<br>0.07( 0.10%)<br>( 81.81%) 0.9045* O 17 s( 0.42%)p99.99( 99.51%)d<br>0.15( 0.06%)  | <u>LP*( 4)Rb 5</u><br>s( 58.95%)p 0.70( 40.98%)d 0.00( 0.08%)                                   | 18.58   |
| <u>BD ( 2) U 1 - O 17</u><br>( 18.21%) 0.4267* U 1 s( 0.10%)p<br>7.09( 0.74%)d99.99( 51.85%)f99.99( 47.16%)g<br>1.33( 0.14%)<br>( 81.79%) 0.9044* O 17 s( 6.98%)p13.32( 92.96%)d<br>0.01( 0.06%)  | <u>LP*( 4)Rb 5</u><br>s( 58.95%)p 0.70( 40.98%)d 0.00( 0.08%)                                   | 12.35   |
| <u>BD ( 3) U 1 - O 17</u><br>( 19.84%) 0.4454* U 1 s( 1.76%)p<br>0.72( 1.27%)d24.17( 42.60%)f30.73( 54.17%)g<br>0.11( 0.19%)<br>( 80.16%) 0.8953* O 17 s( 25.75%)p 2.88( 74.20%)d<br>0.00( 0.04%) | <u>LP*( 4)Rb 5</u><br>s( 58.95%)p 0.70( 40.98%)d 0.00( 0.08%)                                   | 17.57   |
| <u>BD ( 1) U 2 - N 38</u><br>( 18.41%) 0.4291* U 2 s( 8.60%)p 0.16( 1.40%)d<br>4.55( 39.10%) f 5.92( 50.87%)g 0.00( 0.03%)<br>( 81.59%) 0.9032* N 38 s( 42.89%)p 1.33( 57.10%)d<br>0.00( 0.02%)   | <u>LP*( 4)Rb 5</u><br>s( 58.95%)p 0.70( 40.98%)d 0.00( 0.08%)                                   | 29.49   |
| <u>BD ( 1) U 2 - N 39</u><br>( 12.24%) 0.3498* U 2 s( 12.85%)p 0.55( 7.02%)d<br>3.96( 50.86%) f 2.28( 29.26%)g 0.00( 0.01%)<br>( 87.76%) 0.9368* N 39 s( 60.96%)p 0.64( 39.00%)d<br>0.00( 0.04%)  | <u>LP*( 4)Rb 6</u><br>s( 54.39%)p 0.84( 45.58%)d 0.00( 0.03%)                                   | 386.66  |



**Table ST11:** DFT computed NBO second order perturbation analysis for **Cs<sub>2</sub>-2**, s=3 spin state

| Donor NBO                                                      | Acceptor NBO                                                                                     | E(2)<br>kcal/mol |
|----------------------------------------------------------------|--------------------------------------------------------------------------------------------------|------------------|
| <u>LP ( 1) O 11</u><br>s( 68.34%)p 0.46( 31.65%)d 0.00( 0.01%) | <u>395. LP*( 4) U 1</u><br>s( 0.57%)p 4.44( 2.51%)d99.99( 90.64%)f11.10( 6.27%)g<br>0.04( 0.02%) | 30.98            |
| <u>LP ( 1) O 11</u><br>s( 68.34%)p 0.46( 31.65%)d 0.00( 0.01%) | <u>LP*( 4) U 2</u><br>s( 1.36%)p 4.33( 5.90%)d56.34( 76.72%)f11.76( 16.01%)g<br>0.01( 0.02%)     | 6.03             |
| <u>LP ( 1) O 11</u><br>s( 68.34%)p 0.46( 31.65%)d 0.00( 0.01%) | <u>LP*( 5) U 2</u><br>s( 0.15%)p17.06( 2.54%)d99.99( 88.59%) f58.44( 8.70%)g<br>0.08( 0.01%)     | 6.68             |
| <u>LP ( 2) O 11</u><br>s( 31.26%)p 2.20( 68.73%)d 0.00( 0.01%) | <u>LP*( 4) U 2</u><br>s( 1.36%)p 4.33( 5.90%)d56.34( 76.72%)f11.76( 16.01%)g<br>0.01( 0.02%)     | 21.99            |
| <u>LP ( 2) O 11</u><br>s( 31.26%)p 2.20( 68.73%)d 0.00( 0.01%) | <u>LP*( 5) U 2</u><br>s( 0.15%)p17.06( 2.54%)d99.99( 88.59%) f58.44( 8.70%)g<br>0.08( 0.01%)     | 12.63            |

**Table ST12:** DFT computed NBO second order perturbation analysis for **Cs<sub>2</sub>-N<sub>2</sub>**, s=1 spin state

| Donor NBO                                                                                                                                                                                          | Acceptor NBO                                                                                  | E(2)<br>kcal/mol |
|----------------------------------------------------------------------------------------------------------------------------------------------------------------------------------------------------|-----------------------------------------------------------------------------------------------|------------------|
| <u>BD ( 1) U 1 - O 11</u><br>( 12.17%) 0.3488* U 1 s( 6.81%)p 0.07( 0.46%)d<br>4.23( 28.84%) f 9.37( 63.83%)g 0.01( 0.06%)<br>( 87.83%) 0.9372* O 11 s( 15.03%)p 5.65( 84.93%)d<br>0.00( 0.03%)    | <u>LP*( 9) U 2</u><br>s( 0.55%)p0.63( 0.35%)d99.99( 66.64%)f58.68( 32.45%)g<br>0.01( 0.00%)   | 11.15            |
| <u>BD ( 1) U 1 - N 36</u><br>( 17.95%) 0.4237* U 1 s( 8.06%)p 1.36( 10.93%)d<br>4.38( 35.33%) f 5.66( 45.65%)g 0.00( 0.03%)<br>( 82.05%) 0.9058* N 36 s( 52.66%)p 0.90( 47.31%)d<br>0.00( 0.04%)   | <u>LP*( 9) U 2</u><br>s( 0.55%)p0.63( 0.35%)d99.99( 66.64%)f58.68( 32.45%)g<br>0.01( 0.00%)   | 10.89            |
| <u>BD ( 2) U 1 - N 36</u><br>( 12.41%) 0.3522* U 1<br>s( 0.19%)p37.26( 6.93%)d87.67( 16.32%)<br>f99.99( 76.54%)g 0.10( 0.02%)<br>( 87.59%) 0.9359* N 36 s( 21.75%)p 3.59( 78.17%)d<br>0.00( 0.08%) | <u>LP*( 3) U 2</u><br>s( 0.41%)p0.74( 0.31%)d78.71( 32.48%)f99.99( 66.80%)g<br>0.02( 0.01%)   | 13.88            |
| <u>BD ( 1) U 2 - O 11</u><br>( 11.73%) 0.3426* U 2 s( 6.20%)p 0.13( 0.79%)d<br>5.24( 32.51%) f 9.74( 60.43%)g 0.01( 0.07%)<br>( 88.27%) 0.9395* O 11 s( 15.05%)p 5.64( 84.91%)d<br>0.00( 0.04%)    | <u>LP*( 2) U 1</u><br>s( 1.10%)p 0.69( 0.76%)d73.24( 80.23%) f16.35( 17.91%)g<br>0.01( 0.01%) | 15.82            |
| <u>BD ( 1) U 2 - N 36</u><br>( 26.50%) 0.5148* U 2 s( 2.81%)p 0.63( 1.78%)d<br>4.01( 11.28%) f29.88( 84.11%)g 0.01( 0.02%)<br>( 73.50%) 0.8573* N 36 s( 0.36%)p99.99( 99.54%)d<br>0.29( 0.10%)     | <u>LP*( 2) U 1</u><br>s( 1.10%)p 0.69( 0.76%)d73.24( 80.23%) f16.35( 17.91%)g<br>0.01( 0.01%) | 11.94            |

**Table ST13:** DFT computed NBO second order perturbation analysis for **Cs<sub>4</sub>-(N)<sub>2</sub>**, s=1 spin state

| Donor NBO                                                                                                                                                                                       | Acceptor NBO                                                                                   | E(2)<br>kcal/mol |
|-------------------------------------------------------------------------------------------------------------------------------------------------------------------------------------------------|------------------------------------------------------------------------------------------------|------------------|
| <u>BD ( 1) U 2 - N 39</u><br>( 12.21%) 0.3494* U 2 s( 12.50%)p 0.62( 7.78%)d<br>4.14( 51.70%)f 2.24( 28.01%)g 0.00( 0.01%)<br>( 87.79%) 0.9370* N 39 s( 60.86%)p 0.64( 39.10%)d<br>0.00( 0.04%) | <u>LP*( 3) U 1</u><br>s( 12.50%)p 4.43( 55.33%)d 0.44( 5.52%)f 2.13( 26.61%)g<br>0.00( 0.04%)  | 21.71            |
| <u>LP ( 1) O 17</u><br>s( 70.00%)p 0.43( 30.00%)d 0.00( 0.00%)                                                                                                                                  | <u>LP*( 7) U 1</u><br>s( 8.43%)p 6.97( 58.72%)d 1.43( 12.07%) f 2.45( 20.66%)g<br>0.01( 0.12%) | 14.24            |
| <u>LP ( 1) N 38</u><br>s( 6.41%)p14.58( 93.55%)d 0.01( 0.04%)                                                                                                                                   | <u>LP*( 3) U 2</u><br>s( 0.53%)p 6.08( 3.23%)d99.99( 57.53%) f72.71( 38.68%)g<br>0.03( 0.02%)  | 42.34            |
| <u>LP ( 2) N 38</u><br>s( 0.07%)p99.99( 99.88%)d 0.57( 0.04%)                                                                                                                                   | <u>LP*( 1) U 1</u><br>s( 0.71%)p2.90( 2.06%)d82.90( 58.72%)f54.36( 38.51%)g<br>0.01( 0.01%)    | 53.86            |
| <u>LP ( 2) N 38</u><br>s( 0.07%)p99.99( 99.88%)d 0.57( 0.04%)                                                                                                                                   | <u>LP*( 4) U 2</u><br>s( 0.30%)p 5.67( 1.71%)d99.99( 69.59%) f94.37( 28.39%)g<br>0.04( 0.01%)  | 36.25            |
| <u>LP ( 1) N 38</u><br>s( 6.41%)p14.58( 93.55%)d 0.01( 0.04%)                                                                                                                                   | <u>LP*( 3) U 1</u><br>s( 12.50%)p 4.43( 55.33%)d 0.44( 5.52%)f 2.13( 26.61%)g<br>0.00( 0.04%)  | 8.27             |

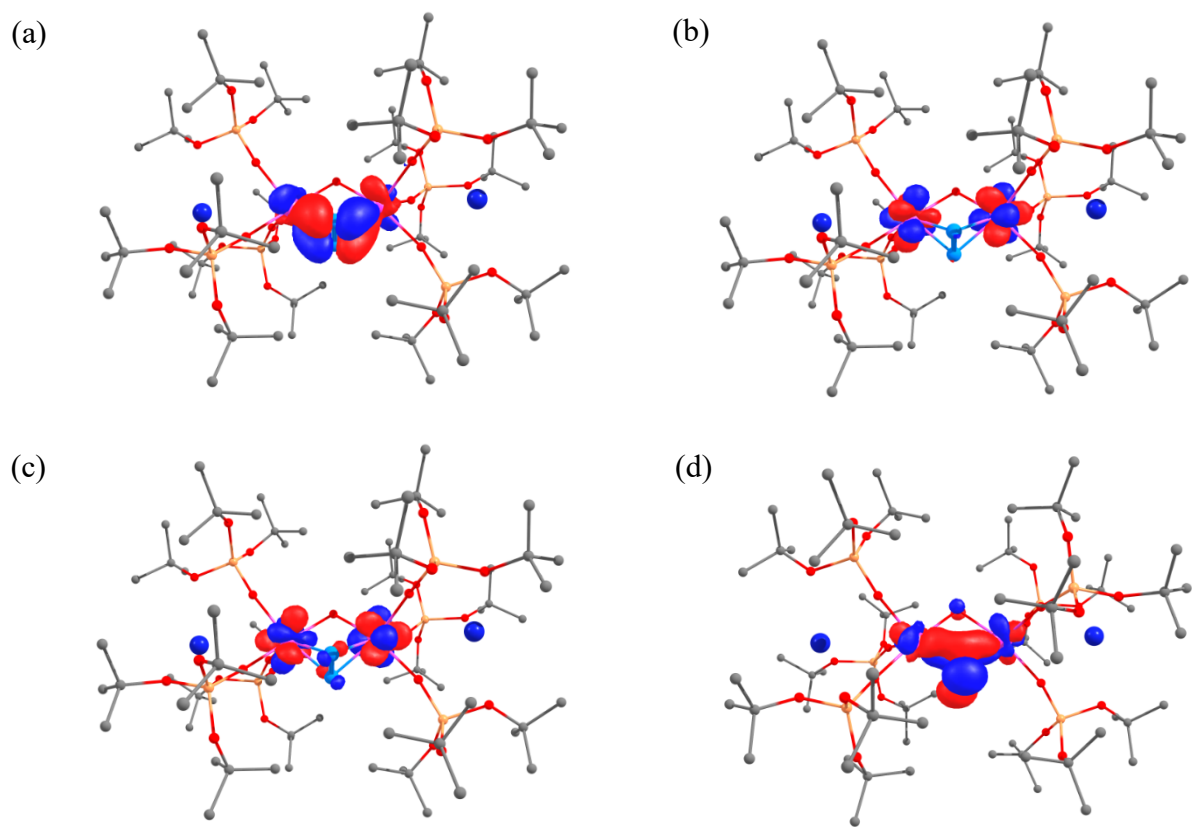

**Figure SF2:** DFT computed MO's (a) HOMO-3 (b) HOMO-2 (c) HOMO-1 (d) HOMO of  $K_2-N_2$

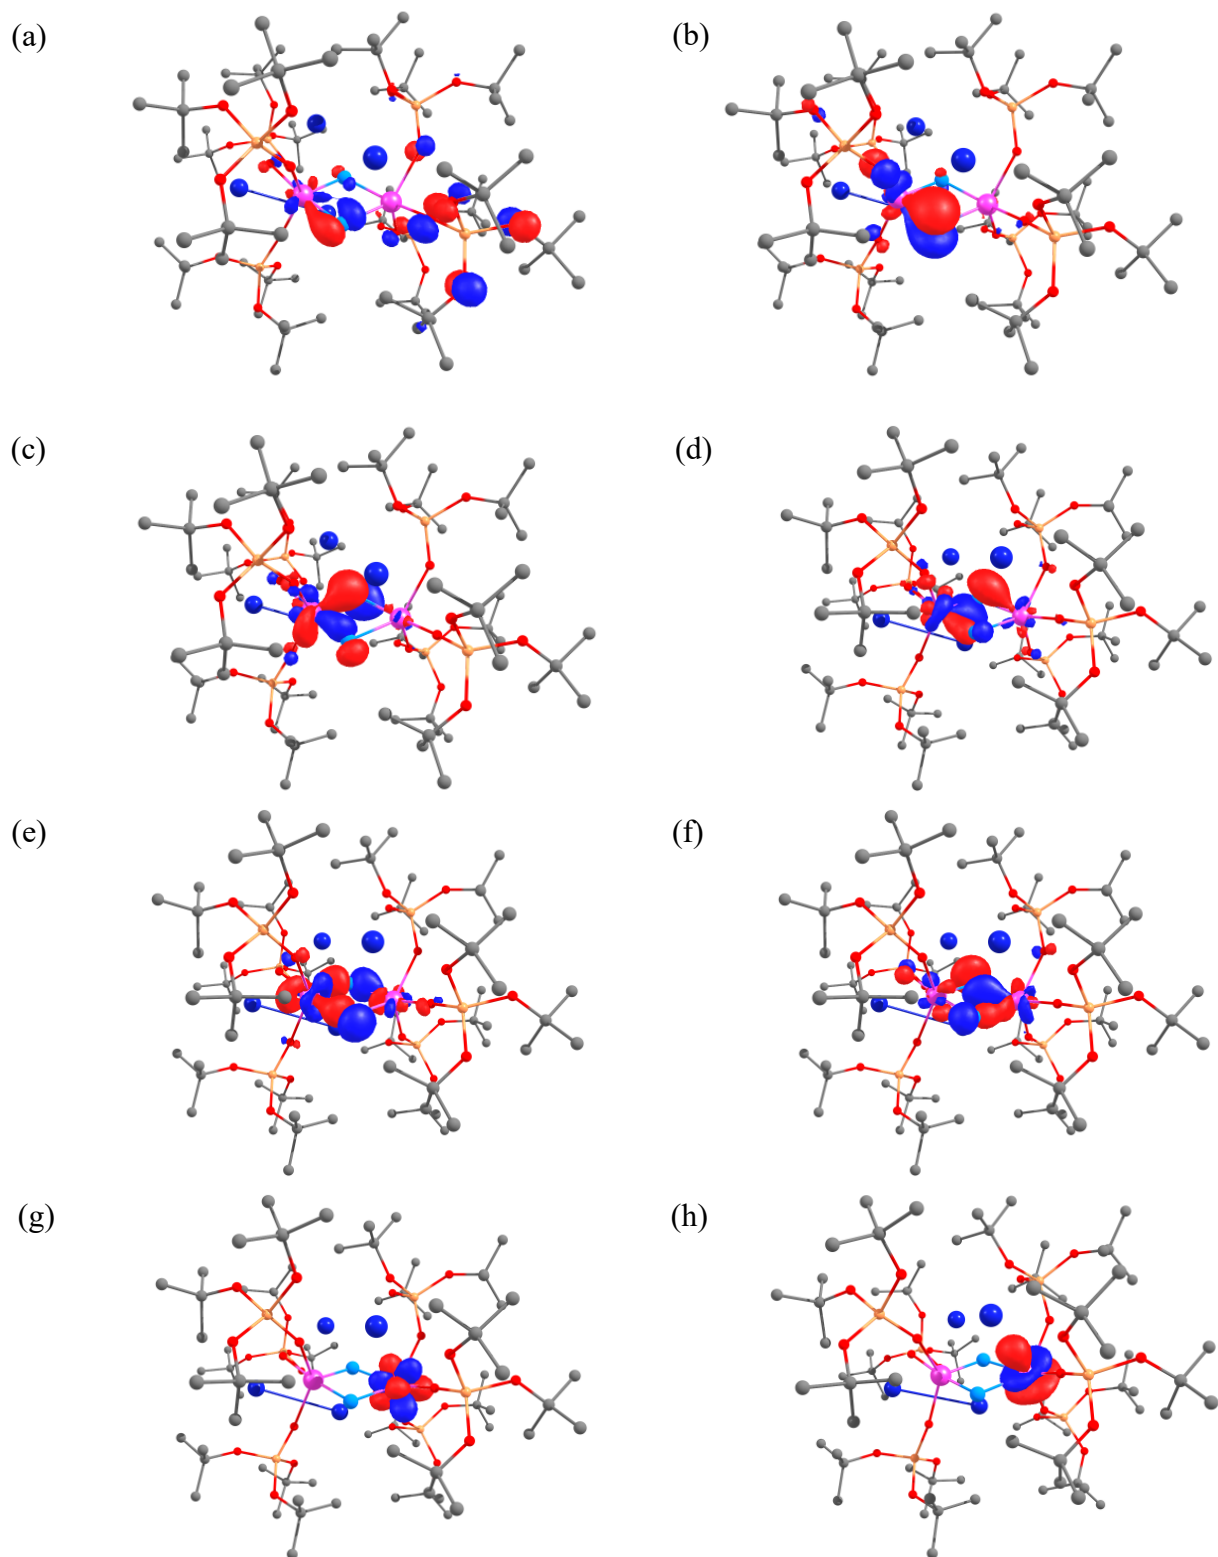

**Figure SF3:** DFT computed MO's (a) HOMO-8 (b) HOMO-6 (c) HOMO-5 (d) HOMO-4 (e) HOMO-3 (f) HOMO-2 (g) HOMO-1 (h) HOMO of  $K_4-N_2$

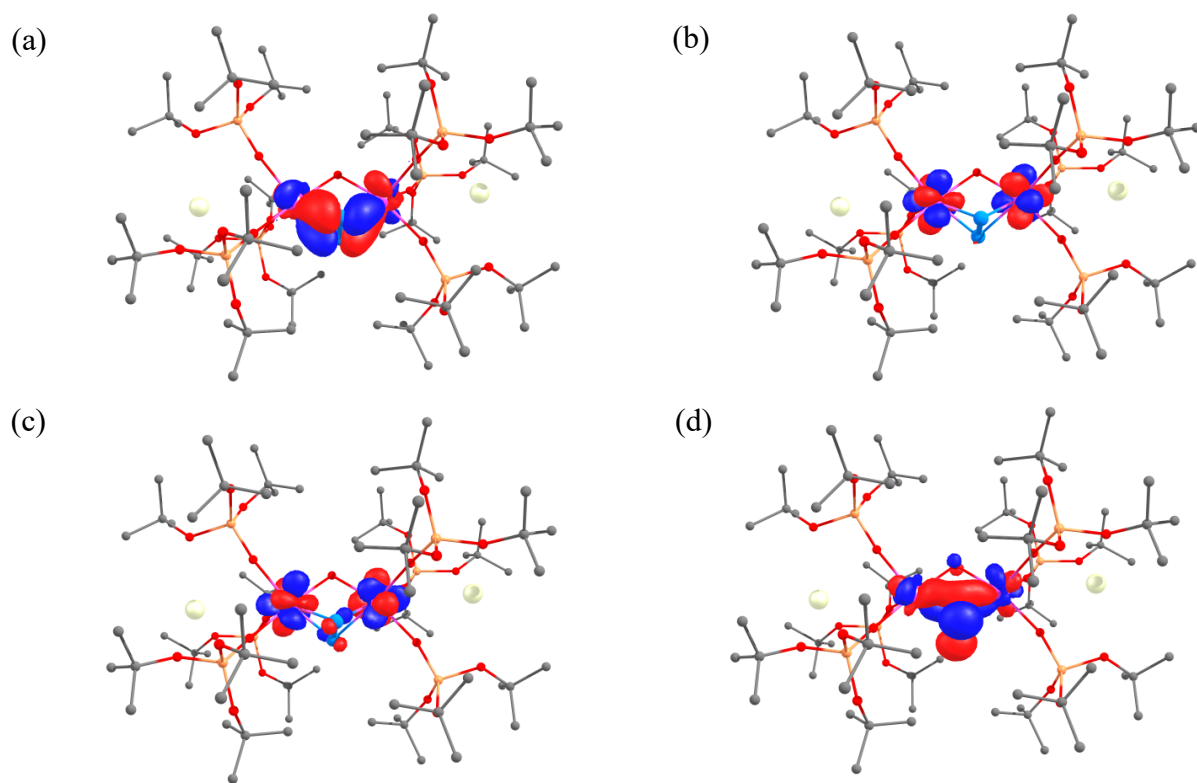

Figure SF4: DFT computed MO's (a) HOMO-3 (b) HOMO-2 (c) HOMO-1 (d) HOMO of  $\text{Rb}_2\text{-N}_2$

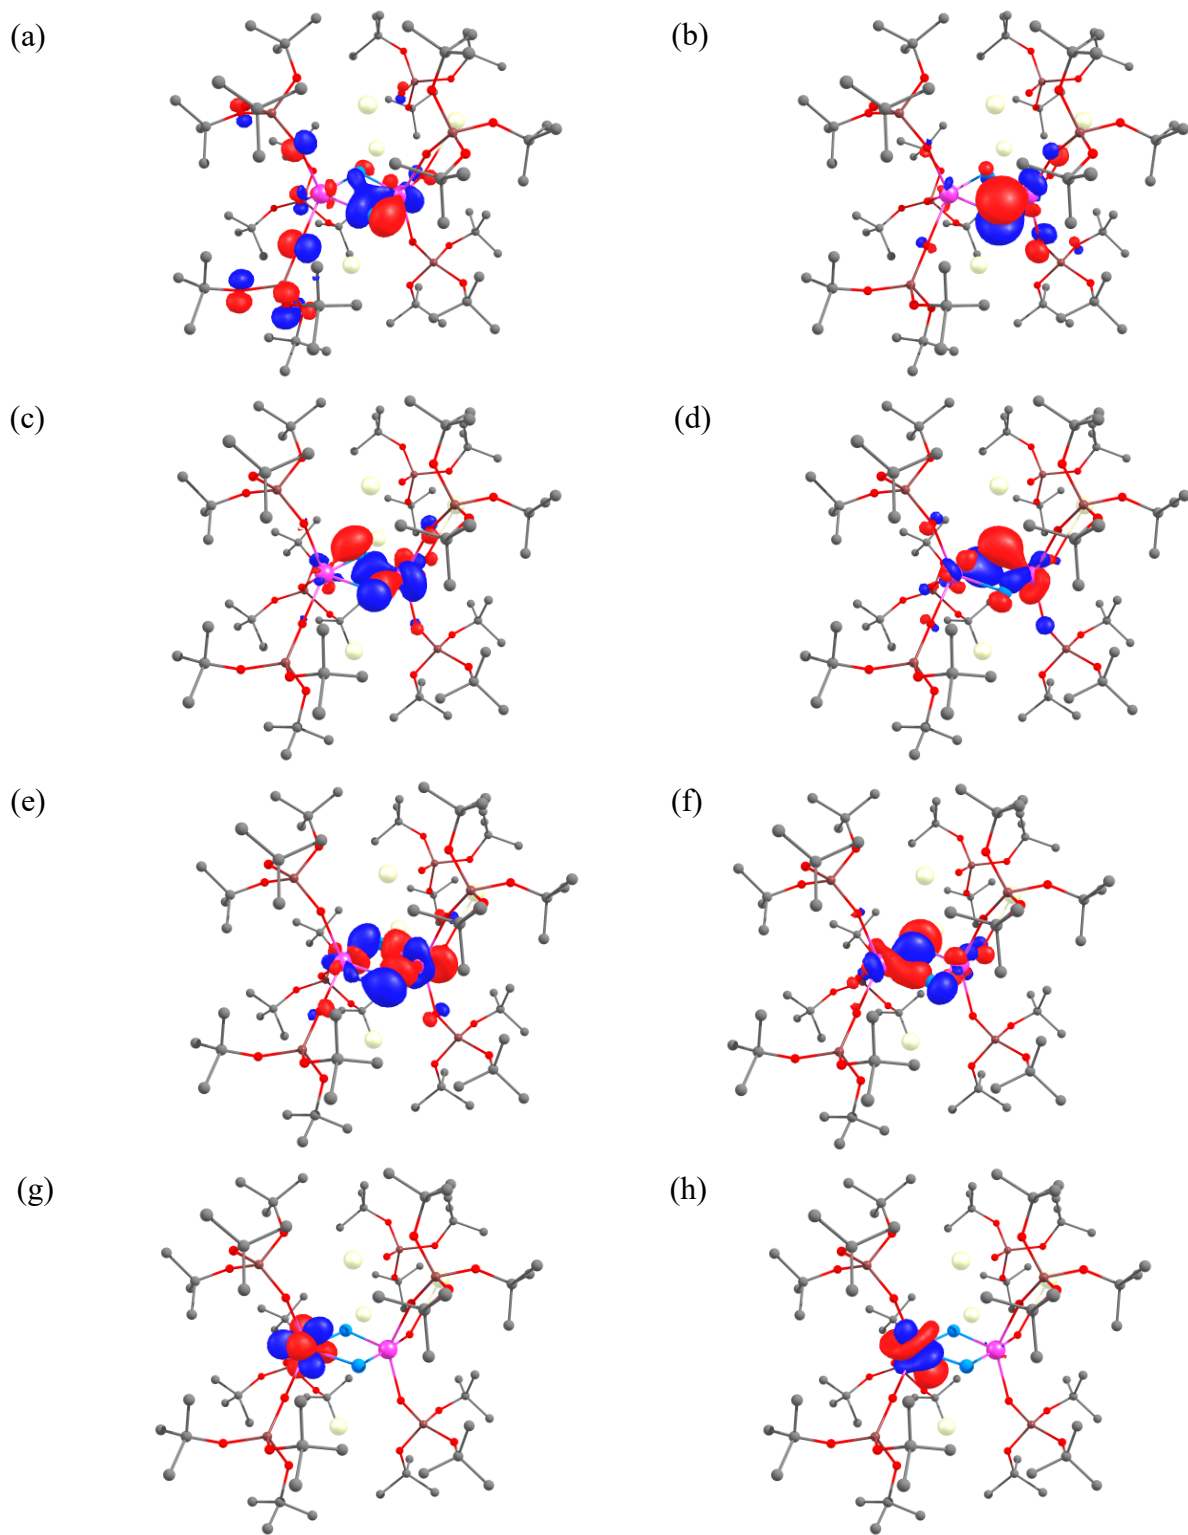

**Figure SF5:** DFT computed MO's (a) HOMO-8 (b) HOMO-6 (c) HOMO-5 (d) HOMO-4 (e) HOMO-3 (f) HOMO-2 (g) HOMO-1 (h) HOMO of  $\text{Rb}_4\text{-N}_2$

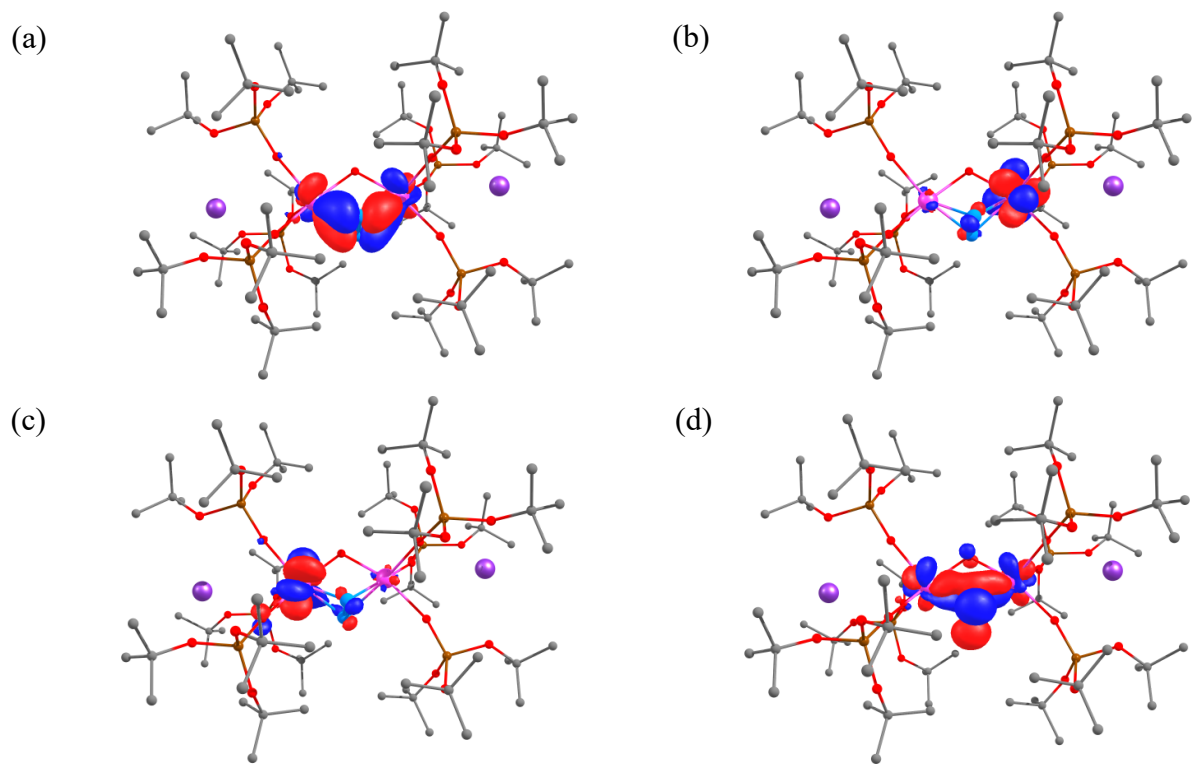

**Figure SF6:** DFT computed MO's (a) HOMO-3 (b) HOMO-2 (c) HOMO-1 (d) HOMO of  $\text{Cs}_2\text{-N}_2$

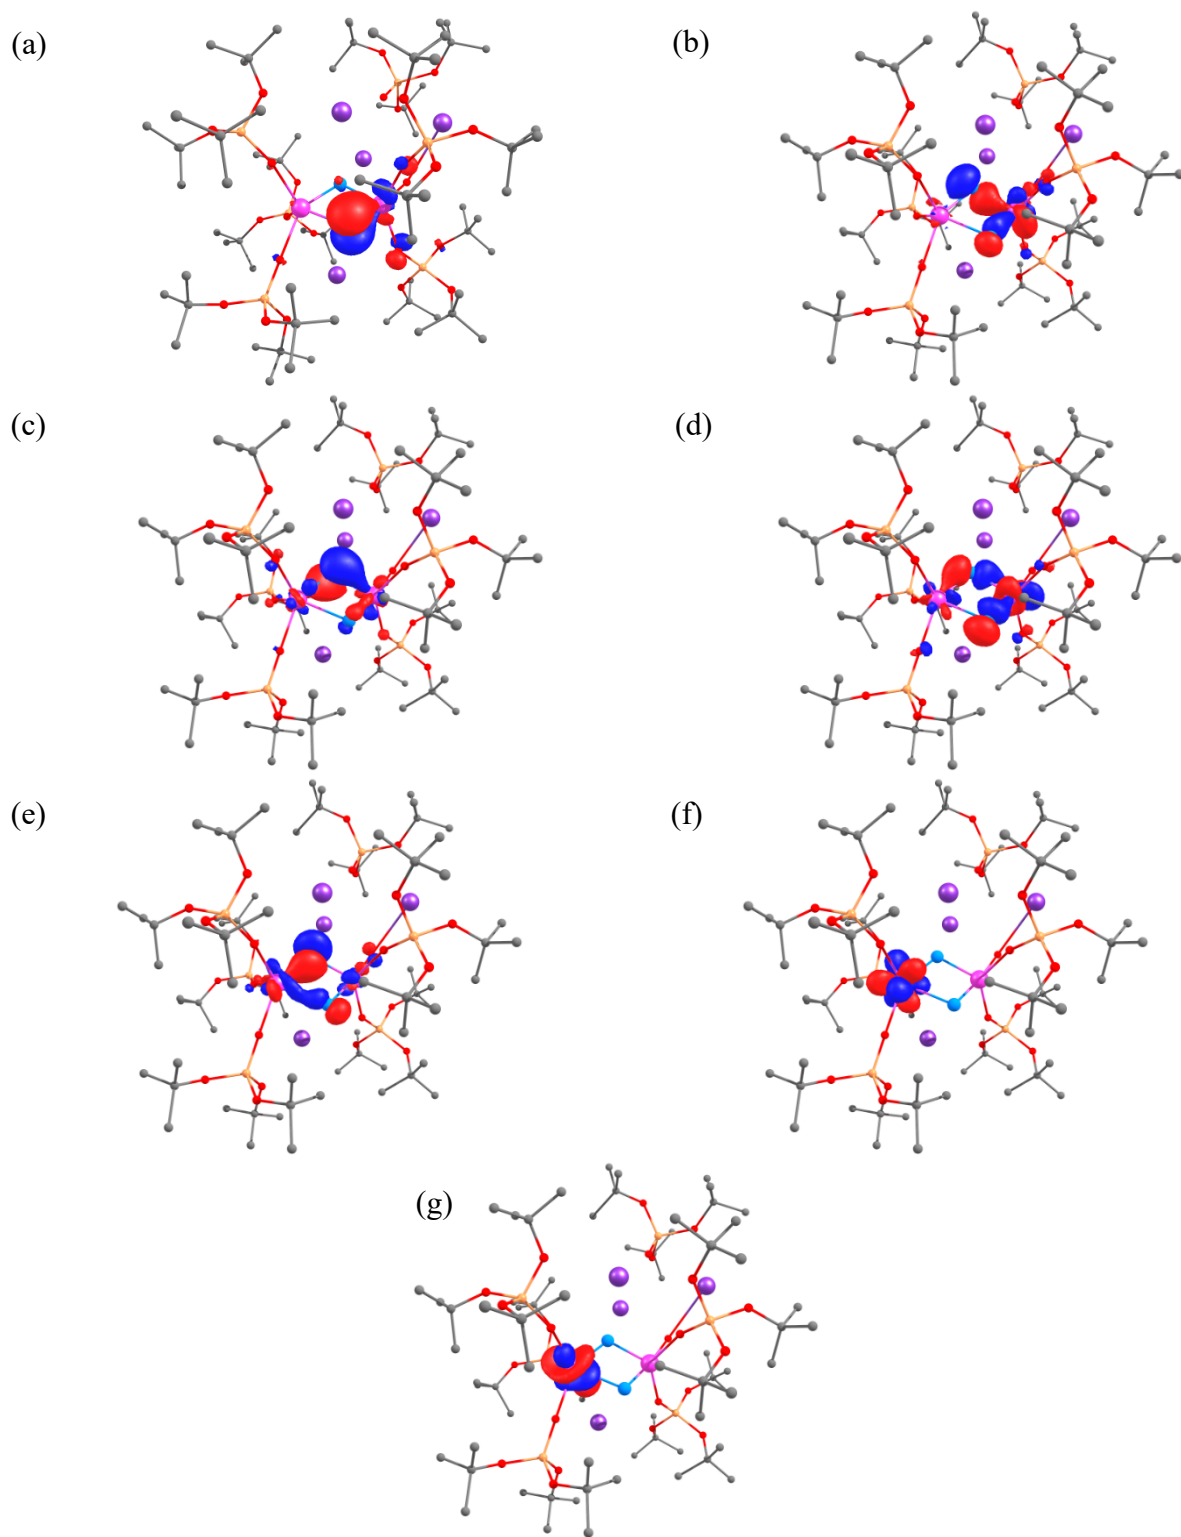

**Figure SF7:** DFT computed MO's (a) HOMO-6 (b) HOMO-5 (c) HOMO-4 (d) HOMO-3 (e) HOMO-2 (f) HOMO-1 (g) HOMO of  $\text{Cs}_4\text{-(N)}_2$



## Optimized Coordinates

### K<sub>2</sub>-2

|    |              |              |              |
|----|--------------|--------------|--------------|
| U  | -3.075568000 | 6.751435000  | 23.344141000 |
| U  | 1.184865000  | 7.177224000  | 23.486604000 |
| K  | -0.718223000 | 10.025067000 | 24.478713000 |
| K  | -0.547974000 | 3.875218000  | 23.555791000 |
| Si | -4.677065000 | 9.382560000  | 24.536030000 |
| Si | -3.945450000 | 6.749225000  | 19.633129000 |
| Si | -3.744941000 | 3.300422000  | 25.004583000 |
| Si | 1.639345000  | 10.567952000 | 21.701505000 |
| Si | 1.678361000  | 8.746366000  | 26.974657000 |
| Si | 2.777693000  | 3.887441000  | 22.311122000 |
| O  | -3.138942000 | 8.861590000  | 24.478038000 |
| O  | -5.442944000 | 8.068869000  | 23.760644000 |
| O  | -5.316096000 | 9.697037000  | 26.049909000 |
| O  | -5.032309000 | 10.747528000 | 23.645634000 |
| O  | -3.438693000 | 6.598545000  | 21.178656000 |
| O  | -2.712229000 | 6.469524000  | 18.528103000 |
| O  | -5.217365000 | 5.679682000  | 19.430878000 |
| O  | -4.568167000 | 8.247012000  | 19.220871000 |
| O  | -3.366305000 | 4.643911000  | 24.165511000 |
| O  | -4.709459000 | 2.201156000  | 24.189977000 |
| O  | 1.358584000  | 9.120715000  | 22.398495000 |
| O  | 0.670121000  | 11.649669000 | 22.577894000 |
| O  | 1.149504000  | 10.725443000 | 20.115099000 |
| O  | 3.244015000  | 11.038820000 | 21.688067000 |
| O  | 1.402095000  | 8.026292000  | 25.539418000 |
| O  | 0.682728000  | 10.118953000 | 26.953066000 |
| O  | 3.216190000  | 9.339828000  | 27.233409000 |
| O  | 1.368508000  | 7.758040000  | 28.288060000 |
| O  | 2.007615000  | 5.081305000  | 23.109392000 |
| O  | 1.624843000  | 2.644748000  | 22.217470000 |
| O  | 3.203622000  | 4.205186000  | 20.730456000 |
| O  | -0.867469000 | 6.686720000  | 23.421492000 |
| C  | -6.799803000 | 7.901307000  | 23.264795000 |
| C  | -6.902356000 | 6.438710000  | 22.841421000 |
| H  | -7.919172000 | 6.211239000  | 22.505058000 |
| H  | -6.665735000 | 5.777471000  | 23.679347000 |
| H  | -6.219378000 | 6.224558000  | 22.013972000 |
| C  | -7.022824000 | 8.814307000  | 22.061836000 |
| H  | -8.024271000 | 8.649850000  | 21.649982000 |
| H  | -6.290918000 | 8.600369000  | 21.278840000 |
| H  | -6.928255000 | 9.863309000  | 22.348578000 |
| C  | -7.796872000 | 8.209162000  | 24.380540000 |
| H  | -8.819765000 | 8.072645000  | 24.014794000 |
| H  | -7.693411000 | 9.239162000  | 24.731696000 |
| H  | -7.648837000 | 7.537931000  | 25.231879000 |
| C  | -5.129340000 | 9.065842000  | 27.324989000 |
| C  | -4.776916000 | 7.588857000  | 27.172270000 |
| H  | -4.691882000 | 7.114178000  | 28.154494000 |
| H  | -3.820970000 | 7.469802000  | 26.654379000 |
| H  | -5.548100000 | 7.065442000  | 26.601281000 |
| C  | -6.452512000 | 9.228127000  | 28.075226000 |
| H  | -6.378657000 | 8.816474000  | 29.087035000 |
| H  | -7.258749000 | 8.709790000  | 27.548717000 |
| H  | -6.718907000 | 10.286704000 | 28.151818000 |
| C  | -4.008525000 | 9.804128000  | 28.056731000 |
| H  | -3.848937000 | 9.386434000  | 29.056453000 |
| H  | -4.253735000 | 10.865652000 | 28.162320000 |
| H  | -3.077417000 | 9.711828000  | 27.490949000 |
| C  | -5.217773000 | 12.122871000 | 24.012674000 |
| C  | -6.575189000 | 12.300710000 | 24.696662000 |
| H  | -6.747363000 | 13.354299000 | 24.941825000 |

|   |              |              |              |
|---|--------------|--------------|--------------|
| H | -6.619575000 | 11.711780000 | 25.614929000 |
| H | -7.378813000 | 11.972669000 | 24.029948000 |
| C | -4.083276000 | 12.583566000 | 24.929679000 |
| H | -4.186925000 | 13.645430000 | 25.176606000 |
| H | -3.120025000 | 12.447543000 | 24.426890000 |
| H | -4.084024000 | 12.011442000 | 25.861042000 |
| C | -5.185077000 | 12.906372000 | 22.699742000 |
| H | -5.323833000 | 13.976880000 | 22.883403000 |
| H | -5.981798000 | 12.565171000 | 22.032694000 |
| H | -4.229126000 | 12.761354000 | 22.188794000 |
| C | -1.703984000 | 5.452643000  | 18.537459000 |
| C | -0.578175000 | 5.871570000  | 19.485715000 |
| H | 0.239726000  | 5.143438000  | 19.478549000 |
| H | -0.956172000 | 5.973809000  | 20.506973000 |
| H | -0.175663000 | 6.841809000  | 19.178828000 |
| C | -2.292608000 | 4.105573000  | 18.960717000 |
| H | -1.525789000 | 3.325008000  | 18.919700000 |
| H | -3.114323000 | 3.816207000  | 18.299843000 |
| H | -2.682636000 | 4.160849000  | 19.981510000 |
| C | -1.183820000 | 5.372325000  | 17.100577000 |
| H | -0.385051000 | 4.628227000  | 17.014931000 |
| H | -0.787404000 | 6.342536000  | 16.786450000 |
| H | -1.991969000 | 5.096806000  | 16.416351000 |
| C | -6.180971000 | 5.589181000  | 18.370110000 |
| C | -6.705375000 | 4.152403000  | 18.410668000 |
| H | -7.479866000 | 3.997909000  | 17.652032000 |
| H | -7.133357000 | 3.933923000  | 19.393273000 |
| H | -5.892558000 | 3.443355000  | 18.224271000 |
| C | -5.551848000 | 5.877460000  | 17.005207000 |
| H | -6.299194000 | 5.759678000  | 16.213045000 |
| H | -4.725583000 | 5.190115000  | 16.804558000 |
| H | -5.164733000 | 6.898334000  | 16.964762000 |
| C | -7.318376000 | 6.574439000  | 18.650286000 |
| H | -8.095841000 | 6.499775000  | 17.881861000 |
| H | -6.932639000 | 7.596122000  | 18.667077000 |
| H | -7.772520000 | 6.359343000  | 19.622192000 |
| C | -3.896373000 | 9.482116000  | 18.924745000 |
| C | -3.370738000 | 9.438836000  | 17.487800000 |
| H | -2.876126000 | 10.381335000 | 17.229439000 |
| H | -4.198467000 | 9.286044000  | 16.787495000 |
| H | -2.660679000 | 8.618253000  | 17.366759000 |
| C | -4.958722000 | 10.574231000 | 19.060181000 |
| H | -4.538318000 | 11.554247000 | 18.810808000 |
| H | -5.341630000 | 10.610606000 | 20.083531000 |
| H | -5.795478000 | 10.376512000 | 18.382929000 |
| C | -2.760830000 | 9.725709000  | 19.917422000 |
| H | -2.259012000 | 10.674142000 | 19.705880000 |
| H | -2.011472000 | 8.931265000  | 19.859566000 |
| H | -3.152192000 | 9.760929000  | 20.938850000 |
| O | -2.220843000 | 2.621375000  | 25.354085000 |
| C | -1.854768000 | 1.571884000  | 26.271915000 |
| C | -2.019798000 | 2.053904000  | 27.714420000 |
| H | -1.679253000 | 1.284456000  | 28.415514000 |
| H | -3.061830000 | 2.295743000  | 27.924624000 |
| H | -1.425134000 | 2.957404000  | 27.878787000 |
| C | -2.680572000 | 0.310203000  | 26.018404000 |
| H | -2.372437000 | -0.487808000 | 26.702242000 |
| H | -2.537482000 | -0.044731000 | 24.993402000 |
| H | -3.745323000 | 0.497828000  | 26.166938000 |
| C | -0.378051000 | 1.281943000  | 25.997312000 |
| H | 0.232831000  | 2.173070000  | 26.177321000 |
| H | -0.232018000 | 0.954794000  | 24.962956000 |
| H | -0.008929000 | 0.489032000  | 26.655454000 |
| C | -4.753429000 | 1.781704000  | 22.819164000 |

|   |              |              |              |
|---|--------------|--------------|--------------|
| C | -3.360812000 | 1.813417000  | 22.187741000 |
| H | -3.391513000 | 1.429925000  | 21.163359000 |
| H | -2.663590000 | 1.200668000  | 22.767435000 |
| H | -2.998387000 | 2.845280000  | 22.148231000 |
| C | -5.293522000 | 0.350299000  | 22.837229000 |
| H | -5.390708000 | -0.041926000 | 21.819793000 |
| H | -6.279215000 | 0.324984000  | 23.311385000 |
| H | -4.625629000 | -0.307257000 | 23.401673000 |
| C | -5.701804000 | 2.701996000  | 22.053502000 |
| H | -5.796739000 | 2.382194000  | 21.011406000 |
| H | -5.331567000 | 3.729696000  | 22.058096000 |
| H | -6.696671000 | 2.684399000  | 22.509360000 |
| O | -4.510375000 | 3.529616000  | 26.467637000 |
| C | -5.853944000 | 3.304511000  | 26.929351000 |
| C | -6.141617000 | 1.803829000  | 27.016754000 |
| H | -5.437883000 | 1.316922000  | 27.699430000 |
| H | -6.058092000 | 1.340920000  | 26.031263000 |
| H | -7.153284000 | 1.632155000  | 27.399896000 |
| C | -6.858418000 | 3.986206000  | 26.001917000 |
| H | -6.649689000 | 5.057720000  | 25.939072000 |
| H | -7.879567000 | 3.858279000  | 26.376341000 |
| H | -6.802529000 | 3.556801000  | 24.998563000 |
| C | -5.914695000 | 3.924768000  | 28.326279000 |
| H | -5.694847000 | 4.993853000  | 28.279704000 |
| H | -5.182108000 | 3.451971000  | 28.987565000 |
| H | -6.909342000 | 3.792654000  | 28.764423000 |
| C | 0.337070000  | 13.015497000 | 22.246506000 |
| C | -0.031253000 | 13.688285000 | 23.569973000 |
| H | -0.300634000 | 14.737307000 | 23.411458000 |
| H | 0.809883000  | 13.650143000 | 24.268945000 |
| H | -0.892516000 | 13.195415000 | 24.034220000 |
| C | -0.861616000 | 13.006564000 | 21.297740000 |
| H | -1.187435000 | 14.027506000 | 21.070967000 |
| H | -1.701887000 | 12.469608000 | 21.749120000 |
| H | -0.593852000 | 12.501765000 | 20.367278000 |
| C | 1.514850000  | 13.752933000 | 21.608663000 |
| H | 1.232175000  | 14.789357000 | 21.396107000 |
| H | 1.809697000  | 13.278306000 | 20.670839000 |
| H | 2.379815000  | 13.762433000 | 22.276314000 |
| C | 1.815362000  | 10.348544000 | 18.896551000 |
| C | 0.711481000  | 10.190482000 | 17.851662000 |
| H | 1.136198000  | 9.931263000  | 16.876360000 |
| H | 0.151833000  | 11.124752000 | 17.745676000 |
| H | 0.011198000  | 9.405018000  | 18.147180000 |
| C | 2.777161000  | 11.466366000 | 18.486628000 |
| H | 3.281835000  | 11.216538000 | 17.547033000 |
| H | 3.530772000  | 11.620853000 | 19.262333000 |
| H | 2.229840000  | 12.402925000 | 18.338031000 |
| C | 2.568047000  | 9.030513000  | 19.075596000 |
| H | 3.008971000  | 8.708153000  | 18.126685000 |
| H | 1.887573000  | 8.248542000  | 19.424929000 |
| H | 3.374709000  | 9.144351000  | 19.804899000 |
| C | 4.266191000  | 11.011801000 | 22.693922000 |
| C | 3.693777000  | 11.338117000 | 24.071577000 |
| H | 4.489208000  | 11.367507000 | 24.821693000 |
| H | 2.970695000  | 10.581760000 | 24.388056000 |
| H | 3.197987000  | 12.312742000 | 24.060537000 |
| C | 4.922718000  | 9.630352000  | 22.693830000 |
| H | 5.746832000  | 9.589287000  | 23.414050000 |
| H | 5.322516000  | 9.399584000  | 21.701682000 |
| H | 4.193427000  | 8.858995000  | 22.959237000 |
| C | 5.284999000  | 12.075028000 | 22.276252000 |
| H | 6.127871000  | 12.102121000 | 22.974498000 |
| H | 4.821330000  | 13.065743000 | 22.255996000 |

|   |              |              |              |
|---|--------------|--------------|--------------|
| H | 5.671867000  | 11.859005000 | 21.275778000 |
| C | 0.681000000  | 11.244480000 | 27.860095000 |
| C | -0.637417000 | 11.978249000 | 27.610238000 |
| H | -0.727188000 | 12.846020000 | 28.271333000 |
| H | -1.490121000 | 11.319304000 | 27.793789000 |
| H | -0.688740000 | 12.346883000 | 26.579659000 |
| C | 1.855667000  | 12.167982000 | 27.532883000 |
| H | 1.839061000  | 13.052300000 | 28.179283000 |
| H | 1.796591000  | 12.502160000 | 26.492476000 |
| H | 2.801654000  | 11.642137000 | 27.667673000 |
| C | 0.744224000  | 10.777120000 | 29.314531000 |
| H | 0.689566000  | 11.638179000 | 29.988939000 |
| H | 1.675289000  | 10.242974000 | 29.516031000 |
| H | -0.089249000 | 10.106978000 | 29.542725000 |
| C | 4.398197000  | 8.727649000  | 27.775388000 |
| C | 5.561475000  | 9.627428000  | 27.354769000 |
| H | 6.506188000  | 9.253605000  | 27.762867000 |
| H | 5.408087000  | 10.647182000 | 27.720714000 |
| H | 5.644835000  | 9.660946000  | 26.264846000 |
| C | 4.292970000  | 8.682979000  | 29.301422000 |
| H | 5.197924000  | 8.246915000  | 29.738029000 |
| H | 3.430253000  | 8.085668000  | 29.604186000 |
| H | 4.176459000  | 9.694568000  | 29.703625000 |
| C | 4.587327000  | 7.325787000  | 27.200780000 |
| H | 5.516744000  | 6.879559000  | 27.569937000 |
| H | 4.637151000  | 7.368219000  | 26.109301000 |
| H | 3.757566000  | 6.674807000  | 27.488605000 |
| C | 0.413546000  | 6.700326000  | 28.459379000 |
| C | 0.269592000  | 6.518052000  | 29.971523000 |
| H | -0.427662000 | 5.705890000  | 30.201247000 |
| H | -0.104109000 | 7.437191000  | 30.432465000 |
| H | 1.238452000  | 6.280348000  | 30.421159000 |
| C | 0.969478000  | 5.425649000  | 27.821913000 |
| H | 0.279217000  | 4.588076000  | 27.964888000 |
| H | 1.929498000  | 5.158970000  | 28.274979000 |
| H | 1.120711000  | 5.576764000  | 26.748899000 |
| C | -0.934717000 | 7.067327000  | 27.840305000 |
| H | -1.673088000 | 6.283023000  | 28.034897000 |
| H | -0.848066000 | 7.186316000  | 26.755940000 |
| H | -1.308033000 | 8.002872000  | 28.266535000 |
| C | 1.668079000  | 1.450951000  | 21.403226000 |
| C | 1.155990000  | 1.796745000  | 20.004836000 |
| H | 1.145843000  | 0.909360000  | 19.362742000 |
| H | 1.793967000  | 2.558455000  | 19.552169000 |
| H | 0.135367000  | 2.187516000  | 20.061640000 |
| C | 0.733179000  | 0.446648000  | 22.077721000 |
| H | 0.676831000  | -0.479572000 | 21.496930000 |
| H | -0.281517000 | 0.850960000  | 22.157024000 |
| H | 1.092068000  | 0.199797000  | 23.081660000 |
| C | 3.078926000  | 0.867276000  | 21.329590000 |
| H | 3.069877000  | -0.053888000 | 20.737429000 |
| H | 3.456048000  | 0.631475000  | 22.327972000 |
| H | 3.768892000  | 1.570989000  | 20.860064000 |
| O | 4.185996000  | 3.351105000  | 23.038894000 |
| C | 4.525991000  | 3.155024000  | 24.418054000 |
| C | 3.315023000  | 2.686185000  | 25.226370000 |
| H | 3.599090000  | 2.490003000  | 26.265553000 |
| H | 2.899724000  | 1.767343000  | 24.802645000 |
| H | 2.538095000  | 3.456731000  | 25.225764000 |
| C | 5.620332000  | 2.085969000  | 24.432796000 |
| H | 5.972581000  | 1.903554000  | 25.453278000 |
| H | 6.472170000  | 2.407233000  | 23.826145000 |
| H | 5.245448000  | 1.143673000  | 24.022512000 |
| C | 5.063713000  | 4.472518000  | 24.974712000 |

|   |             |             |              |
|---|-------------|-------------|--------------|
| H | 5.375358000 | 4.360770000 | 26.018350000 |
| H | 4.291801000 | 5.244760000 | 24.925018000 |
| H | 5.928117000 | 4.805571000 | 24.391980000 |
| C | 4.365712000 | 4.842882000 | 20.170967000 |
| C | 5.515523000 | 3.834693000 | 20.108570000 |
| H | 6.405341000 | 4.293652000 | 19.664420000 |
| H | 5.234863000 | 2.975466000 | 19.490818000 |
| H | 5.763973000 | 3.478407000 | 21.110744000 |
| C | 4.765587000 | 6.063519000 | 20.999302000 |
| H | 5.627969000 | 6.565963000 | 20.548918000 |
| H | 5.038382000 | 5.768937000 | 22.016809000 |
| H | 3.942907000 | 6.783207000 | 21.048937000 |
| C | 3.958554000 | 5.266608000 | 18.759634000 |
| H | 4.794211000 | 5.750301000 | 18.243576000 |
| H | 3.120212000 | 5.967115000 | 18.797457000 |
| H | 3.652198000 | 4.393667000 | 18.175095000 |

### Rb<sub>2</sub>-2

|    |              |              |              |
|----|--------------|--------------|--------------|
| U  | 6.554440000  | 9.041519000  | 8.631160000  |
| U  | 7.427076000  | 11.667680000 | 5.389178000  |
| Rb | 5.119266000  | 8.750981000  | 4.736982000  |
| Rb | 8.001289000  | 12.452616000 | 9.330943000  |
| Si | 9.508247000  | 8.796639000  | 10.889156000 |
| Si | 4.716970000  | 11.381592000 | 11.056358000 |
| Si | 4.598403000  | 6.031196000  | 7.419164000  |
| Si | 3.968959000  | 12.475719000 | 3.897542000  |
| Si | 8.556004000  | 9.244701000  | 2.650648000  |
| Si | 9.541844000  | 14.595928000 | 6.563993000  |
| O  | 8.538784000  | 8.716543000  | 9.581956000  |
| O  | 10.999693000 | 8.067187000  | 10.655945000 |
| O  | 9.669058000  | 10.443811000 | 11.245150000 |
| O  | 8.914555000  | 8.091409000  | 12.282911000 |
| O  | 5.591472000  | 10.391591000 | 10.099703000 |
| O  | 5.350416000  | 12.925903000 | 10.775265000 |
| O  | 4.902184000  | 11.164862000 | 12.700781000 |
| O  | 3.070200000  | 11.302460000 | 10.787229000 |
| O  | 5.569165000  | 7.340454000  | 7.484818000  |
| O  | 3.390013000  | 5.957004000  | 8.571133000  |
| O  | 3.809232000  | 6.177471000  | 5.927969000  |
| O  | 5.392929000  | 4.561964000  | 7.557472000  |
| O  | 5.434970000  | 12.062562000 | 4.477278000  |
| O  | 3.024363000  | 13.433402000 | 4.890010000  |
| O  | 3.134616000  | 11.011473000 | 3.752355000  |
| O  | 4.014259000  | 13.308505000 | 2.447060000  |
| O  | 8.197551000  | 10.144063000 | 3.961486000  |
| O  | 7.212746000  | 8.236928000  | 2.433213000  |
| O  | 8.722702000  | 10.076735000 | 1.212492000  |
| O  | 9.977766000  | 8.372364000  | 2.799211000  |
| O  | 8.814998000  | 13.143079000 | 6.419197000  |
| O  | 8.887879000  | 15.833779000 | 5.655479000  |
| O  | 11.171598000 | 14.602496000 | 6.176195000  |
| O  | 9.294008000  | 15.022832000 | 8.184504000  |
| O  | 6.890360000  | 10.480106000 | 7.076171000  |
| C  | 11.844046000 | 8.020105000  | 9.499966000  |
| C  | 11.362247000 | 6.892013000  | 8.586047000  |
| H  | 11.379341000 | 5.937540000  | 9.121551000  |
| H  | 12.007894000 | 6.799293000  | 7.705908000  |
| H  | 10.338946000 | 7.088971000  | 8.255994000  |
| C  | 11.829035000 | 9.358421000  | 8.762281000  |
| H  | 10.827517000 | 9.571644000  | 8.376736000  |
| H  | 12.525526000 | 9.344322000  | 7.917876000  |
| H  | 12.122781000 | 10.166589000 | 9.437916000  |
| C  | 13.249905000 | 7.717832000  | 10.022781000 |
| H  | 13.590904000 | 8.515042000  | 10.690018000 |

|   |              |              |              |
|---|--------------|--------------|--------------|
| H | 13.962538000 | 7.628500000  | 9.196270000  |
| H | 13.252546000 | 6.778898000  | 10.584581000 |
| C | 10.213676000 | 11.035395000 | 12.443811000 |
| C | 11.475731000 | 10.307294000 | 12.909283000 |
| H | 11.258755000 | 9.264376000  | 13.148473000 |
| H | 11.876224000 | 10.789452000 | 13.807406000 |
| H | 12.247312000 | 10.327552000 | 12.134751000 |
| C | 10.568191000 | 12.477748000 | 12.076202000 |
| H | 11.258074000 | 12.501564000 | 11.226647000 |
| H | 11.043420000 | 12.986972000 | 12.920518000 |
| H | 9.669684000  | 13.049245000 | 11.820170000 |
| C | 9.146569000  | 11.019444000 | 13.539263000 |
| H | 9.504066000  | 11.538613000 | 14.435463000 |
| H | 8.894751000  | 9.989867000  | 13.799676000 |
| H | 8.234477000  | 11.514384000 | 13.192692000 |
| C | 8.951824000  | 6.726493000  | 12.732779000 |
| C | 10.307647000 | 6.449714000  | 13.386457000 |
| H | 11.112551000 | 6.602946000  | 12.664292000 |
| H | 10.354990000 | 5.420329000  | 13.757947000 |
| H | 10.463885000 | 7.123766000  | 14.234874000 |
| C | 7.833049000  | 6.601144000  | 13.767616000 |
| H | 7.985719000  | 7.314463000  | 14.583162000 |
| H | 7.809631000  | 5.592078000  | 14.192277000 |
| H | 6.861883000  | 6.807391000  | 13.309444000 |
| C | 8.705249000  | 5.760757000  | 11.573428000 |
| H | 7.750730000  | 5.981627000  | 11.087834000 |
| H | 8.675726000  | 4.727684000  | 11.936313000 |
| H | 9.501096000  | 5.838431000  | 10.828561000 |
| C | 5.095223000  | 14.136148000 | 11.519510000 |
| C | 5.298410000  | 15.282898000 | 10.529281000 |
| H | 6.301848000  | 15.248421000 | 10.094303000 |
| H | 5.179057000  | 16.252190000 | 11.023687000 |
| H | 4.572873000  | 15.219092000 | 9.712930000  |
| C | 6.108031000  | 14.219794000 | 12.664134000 |
| H | 5.982315000  | 13.366440000 | 13.334370000 |
| H | 5.977483000  | 15.145169000 | 13.235247000 |
| H | 7.132856000  | 14.207032000 | 12.276481000 |
| C | 3.671165000  | 14.187876000 | 12.073967000 |
| H | 2.936641000  | 14.116918000 | 11.268488000 |
| H | 3.514061000  | 15.134652000 | 12.601453000 |
| H | 3.493841000  | 13.369668000 | 12.774760000 |
| C | 4.331433000  | 10.181619000 | 13.580184000 |
| C | 5.266663000  | 10.115026000 | 14.787730000 |
| H | 6.266200000  | 9.798419000  | 14.478276000 |
| H | 4.889094000  | 9.406098000  | 15.531859000 |
| H | 5.347263000  | 11.099098000 | 15.259965000 |
| C | 2.937083000  | 10.644814000 | 14.007780000 |
| H | 2.997180000  | 11.608583000 | 14.523731000 |
| H | 2.482113000  | 9.920982000  | 14.692651000 |
| H | 2.293046000  | 10.757870000 | 13.132538000 |
| C | 4.260407000  | 8.821058000  | 12.889125000 |
| H | 3.578169000  | 8.858986000  | 12.034875000 |
| H | 3.896978000  | 8.054740000  | 13.581702000 |
| H | 5.251626000  | 8.528553000  | 12.532209000 |
| C | 2.325678000  | 11.268053000 | 9.557152000  |
| C | 1.028029000  | 12.032396000 | 9.828993000  |
| H | 0.506256000  | 11.599997000 | 10.688038000 |
| H | 0.363052000  | 11.988689000 | 8.960435000  |
| H | 1.234962000  | 13.083669000 | 10.049116000 |
| C | 2.010353000  | 9.808983000  | 9.229837000  |
| H | 1.400967000  | 9.735592000  | 8.322951000  |
| H | 1.454347000  | 9.347836000  | 10.051770000 |
| H | 2.928265000  | 9.236029000  | 9.071067000  |
| C | 3.101226000  | 11.926879000 | 8.418699000  |

|   |              |              |              |
|---|--------------|--------------|--------------|
| H | 3.385716000  | 12.945540000 | 8.696179000  |
| H | 2.497897000  | 11.978034000 | 7.508693000  |
| H | 4.016255000  | 11.372708000 | 8.188009000  |
| C | 3.364032000  | 5.364111000  | 9.882224000  |
| C | 4.674796000  | 5.628613000  | 10.622320000 |
| H | 5.510440000  | 5.155099000  | 10.099976000 |
| H | 4.632028000  | 5.223957000  | 11.638781000 |
| H | 4.864283000  | 6.704586000  | 10.694115000 |
| C | 2.196034000  | 6.028187000  | 10.610959000 |
| H | 2.360538000  | 7.104814000  | 10.698093000 |
| H | 2.079450000  | 5.610873000  | 11.616351000 |
| H | 1.264400000  | 5.866772000  | 10.060061000 |
| C | 3.116793000  | 3.858479000  | 9.761080000  |
| H | 2.154839000  | 3.666027000  | 9.275107000  |
| H | 3.090401000  | 3.394242000  | 10.752884000 |
| H | 3.909436000  | 3.389768000  | 9.173917000  |
| C | 2.632108000  | 5.479420000  | 5.469360000  |
| C | 1.397850000  | 6.222048000  | 5.985144000  |
| H | 1.397881000  | 6.230103000  | 7.077185000  |
| H | 0.477467000  | 5.745480000  | 5.630999000  |
| H | 1.401235000  | 7.258936000  | 5.633410000  |
| C | 2.613905000  | 4.022235000  | 5.932347000  |
| H | 3.499026000  | 3.488070000  | 5.576907000  |
| H | 1.726377000  | 3.516939000  | 5.536994000  |
| H | 2.588097000  | 3.958289000  | 7.020938000  |
| C | 2.686539000  | 5.520419000  | 3.941778000  |
| H | 2.710741000  | 6.552850000  | 3.579436000  |
| H | 1.804406000  | 5.037316000  | 3.509615000  |
| H | 3.577702000  | 5.003002000  | 3.574644000  |
| C | 6.615901000  | 4.085258000  | 6.982361000  |
| C | 7.792419000  | 4.607012000  | 7.807946000  |
| H | 7.809360000  | 5.700001000  | 7.801671000  |
| H | 8.744022000  | 4.240759000  | 7.408440000  |
| H | 7.706664000  | 4.270922000  | 8.845518000  |
| C | 6.545435000  | 2.559062000  | 7.066286000  |
| H | 6.422485000  | 2.243043000  | 8.106498000  |
| H | 7.460023000  | 2.103489000  | 6.672990000  |
| H | 5.694438000  | 2.181573000  | 6.491484000  |
| C | 6.740223000  | 4.528448000  | 5.524811000  |
| H | 6.787676000  | 5.619284000  | 5.461123000  |
| H | 5.883182000  | 4.180814000  | 4.941284000  |
| H | 7.652686000  | 4.121875000  | 5.076973000  |
| C | 3.046360000  | 14.862145000 | 5.071327000  |
| C | 2.256535000  | 15.528908000 | 3.942220000  |
| H | 2.705364000  | 15.294898000 | 2.974932000  |
| H | 2.241765000  | 16.616221000 | 4.074269000  |
| H | 1.220678000  | 15.174114000 | 3.942589000  |
| C | 4.484188000  | 15.379265000 | 5.105763000  |
| H | 4.979982000  | 15.200330000 | 4.147390000  |
| H | 5.056245000  | 14.877264000 | 5.891846000  |
| H | 4.502168000  | 16.456219000 | 5.302141000  |
| C | 2.360292000  | 15.126398000 | 6.411268000  |
| H | 1.349031000  | 14.708274000 | 6.410987000  |
| H | 2.288594000  | 16.202327000 | 6.600865000  |
| H | 2.921417000  | 14.665552000 | 7.227657000  |
| C | 1.728281000  | 10.819338000 | 3.493641000  |
| C | 1.174346000  | 11.861400000 | 2.521136000  |
| H | 1.279525000  | 12.868842000 | 2.928523000  |
| H | 0.111087000  | 11.671533000 | 2.340182000  |
| H | 1.699102000  | 11.822322000 | 1.563238000  |
| C | 0.974813000  | 10.880993000 | 4.823754000  |
| H | 1.377207000  | 10.141422000 | 5.523811000  |
| H | -0.090725000 | 10.672003000 | 4.679732000  |
| H | 1.084590000  | 11.873087000 | 5.267153000  |

|   |              |              |              |
|---|--------------|--------------|--------------|
| C | 1.605853000  | 9.426543000  | 2.875490000  |
| H | 1.975269000  | 8.664588000  | 3.569082000  |
| H | 2.182515000  | 9.364885000  | 1.947112000  |
| H | 0.561548000  | 9.189121000  | 2.649726000  |
| C | 4.825912000  | 13.145018000 | 1.277098000  |
| C | 5.053603000  | 11.666999000 | 0.965940000  |
| H | 5.594249000  | 11.176839000 | 1.780070000  |
| H | 5.650682000  | 11.552990000 | 0.056349000  |
| H | 4.097818000  | 11.155027000 | 0.818744000  |
| C | 4.053582000  | 13.815536000 | 0.138664000  |
| H | 3.088189000  | 13.323818000 | -0.013334000 |
| H | 4.618996000  | 13.764915000 | -0.797506000 |
| H | 3.866871000  | 14.867895000 | 0.373129000  |
| C | 6.157504000  | 13.860405000 | 1.502990000  |
| H | 5.985472000  | 14.911779000 | 1.753123000  |
| H | 6.781978000  | 13.819686000 | 0.605008000  |
| H | 6.701641000  | 13.390389000 | 2.327524000  |
| C | 6.924430000  | 7.371688000  | 1.313554000  |
| C | 5.896775000  | 6.360527000  | 1.822715000  |
| H | 4.975531000  | 6.864898000  | 2.132806000  |
| H | 6.293977000  | 5.799299000  | 2.673889000  |
| H | 5.630648000  | 5.648867000  | 1.034799000  |
| C | 6.321737000  | 8.200230000  | 0.177566000  |
| H | 5.418134000  | 8.713522000  | 0.520148000  |
| H | 6.052082000  | 7.557294000  | -0.667393000 |
| H | 7.035549000  | 8.953403000  | -0.160717000 |
| C | 8.173906000  | 6.632057000  | 0.833274000  |
| H | 8.935837000  | 7.331007000  | 0.482243000  |
| H | 7.914495000  | 5.961659000  | 0.007112000  |
| H | 8.606291000  | 6.033194000  | 1.639345000  |
| C | 9.862940000  | 10.742127000 | 0.642712000  |
| C | 9.297504000  | 11.718618000 | -0.389087000 |
| H | 8.706718000  | 11.182622000 | -1.138189000 |
| H | 10.104811000 | 12.250854000 | -0.902691000 |
| H | 8.651303000  | 12.453836000 | 0.097859000  |
| C | 10.757246000 | 9.707927000  | -0.045460000 |
| H | 11.124634000 | 8.980975000  | 0.682279000  |
| H | 11.614133000 | 10.194806000 | -0.523625000 |
| H | 10.194735000 | 9.175429000  | -0.819304000 |
| C | 10.642762000 | 11.502452000 | 1.715036000  |
| H | 9.995187000  | 12.224360000 | 2.220807000  |
| H | 11.479810000 | 12.047463000 | 1.265852000  |
| H | 11.045877000 | 10.811912000 | 2.460160000  |
| C | 10.560053000 | 7.720990000  | 3.936330000  |
| C | 11.535914000 | 6.688167000  | 3.368932000  |
| H | 11.005562000 | 5.954053000  | 2.755189000  |
| H | 12.053178000 | 6.157728000  | 4.175060000  |
| H | 12.286300000 | 7.178583000  | 2.741395000  |
| C | 11.311451000 | 8.759736000  | 4.768029000  |
| H | 12.071932000 | 9.256787000  | 4.157901000  |
| H | 11.809180000 | 8.289528000  | 5.621708000  |
| H | 10.616826000 | 9.514979000  | 5.144575000  |
| C | 9.487760000  | 7.031807000  | 4.778229000  |
| H | 8.789103000  | 7.768915000  | 5.186271000  |
| H | 9.940573000  | 6.494219000  | 5.616965000  |
| H | 8.927543000  | 6.314814000  | 4.172158000  |
| C | 9.216949000  | 16.346553000 | 4.353055000  |
| C | 7.989520000  | 17.139326000 | 3.903106000  |
| H | 7.114600000  | 16.486770000 | 3.842879000  |
| H | 8.158239000  | 17.589733000 | 2.919534000  |
| H | 7.770706000  | 17.939924000 | 4.616222000  |
| C | 9.501677000  | 15.209247000 | 3.372091000  |
| H | 10.368393000 | 14.628325000 | 3.697739000  |
| H | 9.710492000  | 15.607608000 | 2.373589000  |



|   |              |              |              |
|---|--------------|--------------|--------------|
| H | 8.636385000  | 14.543493000 | 3.296166000  |
| C | 10.430928000 | 17.272068000 | 4.463506000  |
| H | 10.221237000 | 18.094922000 | 5.154523000  |
| H | 10.675608000 | 17.704562000 | 3.487325000  |
| H | 11.298178000 | 16.717248000 | 4.828888000  |
| C | 12.206383000 | 13.641359000 | 6.418581000  |
| C | 12.171184000 | 12.592662000 | 5.306647000  |
| H | 11.206101000 | 12.079249000 | 5.301779000  |
| H | 12.961590000 | 11.847247000 | 5.443672000  |
| H | 12.314605000 | 13.067643000 | 4.331361000  |
| C | 13.521281000 | 14.422262000 | 6.371268000  |
| H | 13.628929000 | 14.923312000 | 5.404627000  |
| H | 14.377040000 | 13.753815000 | 6.511219000  |
| H | 13.544599000 | 15.184477000 | 7.155630000  |
| C | 12.033077000 | 12.978794000 | 7.785410000  |
| H | 12.010387000 | 13.731024000 | 8.579063000  |
| H | 12.859274000 | 12.289812000 | 7.985513000  |
| H | 11.101191000 | 12.406673000 | 7.813928000  |
| C | 9.525275000  | 16.297796000 | 8.820877000  |
| C | 10.857738000 | 16.910485000 | 8.387418000  |
| H | 11.690025000 | 16.241334000 | 8.622354000  |
| H | 11.021475000 | 17.858457000 | 8.910906000  |
| H | 10.870714000 | 17.105916000 | 7.313686000  |
| C | 9.564286000  | 16.010047000 | 10.322632000 |
| H | 8.618501000  | 15.573232000 | 10.659658000 |
| H | 9.723308000  | 16.932074000 | 10.890743000 |
| H | 10.376451000 | 15.316308000 | 10.560944000 |
| C | 8.369037000  | 17.243879000 | 8.490162000  |
| H | 8.320154000  | 17.415907000 | 7.413517000  |
| H | 8.496901000  | 18.203667000 | 9.002264000  |
| H | 7.416581000  | 16.810695000 | 8.808961000  |

### Cs<sub>2</sub>-2

|    |              |              |              |
|----|--------------|--------------|--------------|
| U  | 4.349396000  | 12.111817000 | 37.718734000 |
| U  | 8.122904000  | 12.786566000 | 35.775334000 |
| Cs | 6.690205000  | 14.647510000 | 39.284971000 |
| Cs | 6.024380000  | 9.725028000  | 34.729757000 |
| Si | 2.995118000  | 15.634282000 | 38.366544000 |
| Si | 5.700953000  | 11.250957000 | 41.195315000 |
| Si | 2.408879000  | 9.184358000  | 36.231498000 |
| Si | 9.694323000  | 15.945522000 | 37.366992000 |
| Si | 9.976277000  | 9.399289000  | 35.711291000 |
| Si | 7.015715000  | 12.681084000 | 32.090356000 |
| O  | 6.270744000  | 12.367168000 | 36.767377000 |
| O  | 3.447081000  | 14.133452000 | 37.916581000 |
| O  | 3.599271000  | 16.675733000 | 37.208306000 |
| O  | 3.714352000  | 16.090519000 | 39.825486000 |
| O  | 1.350325000  | 15.831980000 | 38.602322000 |
| O  | 4.957151000  | 11.706731000 | 39.817222000 |
| O  | 7.086325000  | 12.217187000 | 41.291651000 |
| O  | 4.877033000  | 11.586093000 | 42.612257000 |
| O  | 6.044623000  | 9.617924000  | 41.266020000 |
| O  | 3.439447000  | 10.413705000 | 36.532466000 |
| O  | 1.933451000  | 8.286593000  | 37.556249000 |
| O  | 0.971232000  | 9.646393000  | 35.504176000 |
| O  | 3.278485000  | 8.120650000  | 35.247514000 |
| O  | 8.948309000  | 14.547772000 | 36.979986000 |
| O  | 9.110485000  | 17.301370000 | 36.582903000 |
| O  | 11.346161000 | 15.983452000 | 37.108065000 |
| O  | 9.312439000  | 16.218897000 | 38.996049000 |
| O  | 9.175411000  | 10.818353000 | 35.762951000 |
| O  | 10.485963000 | 8.786909000  | 37.182004000 |
| O  | 11.357630000 | 9.420618000  | 34.768627000 |
| O  | 8.849224000  | 8.269813000  | 35.146469000 |

|   |              |              |              |
|---|--------------|--------------|--------------|
| O | 7.399488000  | 12.783701000 | 33.671731000 |
| O | 8.289966000  | 12.671624000 | 31.011620000 |
| O | 6.288286000  | 11.162996000 | 31.903424000 |
| O | 6.015912000  | 13.916815000 | 31.566881000 |
| C | 3.666228000  | 18.108942000 | 37.157886000 |
| C | 2.394879000  | 18.764165000 | 37.700596000 |
| H | 1.517871000  | 18.443972000 | 37.131806000 |
| H | 2.473413000  | 19.853711000 | 37.621738000 |
| H | 2.231959000  | 18.509046000 | 38.750028000 |
| C | 3.838104000  | 18.461730000 | 35.679690000 |
| H | 4.742329000  | 17.993801000 | 35.281857000 |
| H | 3.920264000  | 19.545168000 | 35.544361000 |
| H | 2.981367000  | 18.104032000 | 35.100338000 |
| C | 4.887032000  | 18.572185000 | 37.954804000 |
| H | 5.794760000  | 18.111053000 | 37.554119000 |
| H | 4.780070000  | 18.287545000 | 39.004614000 |
| H | 5.003169000  | 19.659784000 | 37.896022000 |
| C | 3.187710000  | 16.059266000 | 41.167548000 |
| C | 4.392452000  | 16.243333000 | 42.093248000 |
| H | 5.072081000  | 15.387803000 | 42.027368000 |
| H | 4.069266000  | 16.322193000 | 43.136041000 |
| H | 4.938495000  | 17.156759000 | 41.835225000 |
| C | 2.209189000  | 17.219715000 | 41.359132000 |
| H | 1.366191000  | 17.119308000 | 40.672380000 |
| H | 2.709029000  | 18.175248000 | 41.169403000 |
| H | 1.826890000  | 17.234446000 | 42.385487000 |
| C | 2.507704000  | 14.720873000 | 41.453104000 |
| H | 1.649689000  | 14.583062000 | 40.791487000 |
| H | 2.150152000  | 14.693136000 | 42.487874000 |
| H | 3.205901000  | 13.891320000 | 41.307722000 |
| C | 0.241120000  | 15.351070000 | 37.827268000 |
| C | -0.927410000 | 16.284167000 | 38.149282000 |
| H | -1.132896000 | 16.278100000 | 39.224110000 |
| H | -1.833736000 | 15.967896000 | 37.622783000 |
| H | -0.693744000 | 17.310501000 | 37.851553000 |
| C | -0.080869000 | 13.924957000 | 38.275969000 |
| H | 0.778115000  | 13.271856000 | 38.100308000 |
| H | -0.943036000 | 13.527467000 | 37.729957000 |
| H | -0.316703000 | 13.906668000 | 39.344587000 |
| C | 0.559199000  | 15.390358000 | 36.332093000 |
| H | 0.804221000  | 16.407583000 | 36.014968000 |
| H | -0.300911000 | 15.045122000 | 35.749212000 |
| H | 1.411307000  | 14.744200000 | 36.102447000 |
| C | 8.001807000  | 12.360935000 | 42.398282000 |
| C | 9.343578000  | 12.763812000 | 41.783417000 |
| H | 9.258517000  | 13.695204000 | 41.215437000 |
| H | 9.703802000  | 11.983725000 | 41.106416000 |
| H | 10.095688000 | 12.916407000 | 42.564499000 |
| C | 7.478815000  | 13.462329000 | 43.323944000 |
| H | 7.405100000  | 14.416621000 | 42.790942000 |
| H | 8.152680000  | 13.608551000 | 44.174810000 |
| H | 6.486838000  | 13.196120000 | 43.695618000 |
| C | 8.169550000  | 11.056162000 | 43.177286000 |
| H | 8.890720000  | 11.198830000 | 43.989041000 |
| H | 8.536873000  | 10.259174000 | 42.526630000 |
| H | 7.221268000  | 10.733710000 | 43.611865000 |
| C | 3.828342000  | 10.867087000 | 43.282572000 |
| C | 3.206662000  | 11.861344000 | 44.264392000 |
| H | 2.409618000  | 11.384932000 | 44.844489000 |
| H | 2.784833000  | 12.715672000 | 43.728992000 |
| H | 3.965507000  | 12.231402000 | 44.960706000 |
| C | 4.426023000  | 9.682488000  | 44.045489000 |
| H | 4.932118000  | 9.003234000  | 43.356502000 |
| H | 3.641990000  | 9.132534000  | 44.577140000 |

|   |              |              |              |
|---|--------------|--------------|--------------|
| H | 5.153189000  | 10.033599000 | 44.784956000 |
| C | 2.783630000  | 10.390081000 | 42.275084000 |
| H | 2.380367000  | 11.236836000 | 41.712877000 |
| H | 1.956079000  | 9.884715000  | 42.783807000 |
| H | 3.229910000  | 9.684905000  | 41.568214000 |
| C | 6.569614000  | 8.734232000  | 40.260180000 |
| C | 7.325079000  | 7.641777000  | 41.020131000 |
| H | 8.165463000  | 8.066933000  | 41.576482000 |
| H | 7.716792000  | 6.889124000  | 40.328463000 |
| H | 6.659354000  | 7.145808000  | 41.733053000 |
| C | 5.395530000  | 8.121106000  | 39.497882000 |
| H | 4.729098000  | 7.595132000  | 40.188359000 |
| H | 5.747633000  | 7.399756000  | 38.752827000 |
| H | 4.814400000  | 8.890890000  | 38.983010000 |
| C | 7.514665000  | 9.471693000  | 39.313698000 |
| H | 6.986299000  | 10.238695000 | 38.738122000 |
| H | 7.986528000  | 8.780566000  | 38.610346000 |
| H | 8.308822000  | 9.966922000  | 39.878922000 |
| C | 0.867609000  | 8.489459000  | 38.500441000 |
| C | 0.769747000  | 9.963427000  | 38.893745000 |
| H | 1.720208000  | 10.313211000 | 39.308877000 |
| H | -0.006110000 | 10.110423000 | 39.652310000 |
| H | 0.514861000  | 10.576470000 | 38.024554000 |
| C | -0.452935000 | 8.008903000  | 37.893367000 |
| H | -1.274357000 | 8.147396000  | 38.604691000 |
| H | -0.396139000 | 6.943240000  | 37.648767000 |
| H | -0.676587000 | 8.565590000  | 36.980925000 |
| C | 1.227624000  | 7.634226000  | 39.715253000 |
| H | 1.329589000  | 6.584750000  | 39.422502000 |
| H | 0.450208000  | 7.704315000  | 40.482886000 |
| H | 2.175346000  | 7.963800000  | 40.148112000 |
| C | 0.687107000  | 10.496347000 | 34.387853000 |
| C | 1.719727000  | 10.312522000 | 33.275546000 |
| H | 2.713053000  | 10.609288000 | 33.624466000 |
| H | 1.463970000  | 10.934919000 | 32.411673000 |
| H | 1.761582000  | 9.269283000  | 32.951789000 |
| C | 0.668665000  | 11.948744000 | 34.861560000 |
| H | -0.058307000 | 12.073249000 | 35.668849000 |
| H | 0.396270000  | 12.625056000 | 34.044458000 |
| H | 1.653577000  | 12.239415000 | 35.237194000 |
| C | -0.700680000 | 10.082886000 | 33.892398000 |
| H | -0.698216000 | 9.036995000  | 33.571122000 |
| H | -1.014876000 | 10.704804000 | 33.047856000 |
| H | -1.437060000 | 10.191596000 | 34.694234000 |
| C | 2.999060000  | 6.737547000  | 34.950055000 |
| C | 1.499191000  | 6.473843000  | 34.809881000 |
| H | 1.327362000  | 5.422350000  | 34.556461000 |
| H | 1.064930000  | 7.092211000  | 34.019667000 |
| H | 0.979141000  | 6.692590000  | 35.743832000 |
| C | 3.592615000  | 5.873964000  | 36.064967000 |
| H | 4.667914000  | 6.058951000  | 36.157641000 |
| H | 3.446691000  | 4.808859000  | 35.854657000 |
| H | 3.117237000  | 6.117092000  | 37.017675000 |
| C | 3.692520000  | 6.444412000  | 33.618439000 |
| H | 4.771284000  | 6.614448000  | 33.694243000 |
| H | 3.295501000  | 7.086966000  | 32.826893000 |
| H | 3.541135000  | 5.400991000  | 33.324153000 |
| C | 9.481137000  | 17.904787000 | 35.332908000 |
| C | 9.796096000  | 16.839494000 | 34.284804000 |
| H | 10.651511000 | 16.232926000 | 34.595203000 |
| H | 10.038253000 | 17.305627000 | 33.324278000 |
| H | 8.933729000  | 16.183821000 | 34.134711000 |
| C | 10.691998000 | 18.813207000 | 35.557954000 |
| H | 11.540090000 | 18.227657000 | 35.920765000 |

|   |              |              |              |
|---|--------------|--------------|--------------|
| H | 10.455603000 | 19.585381000 | 36.297300000 |
| H | 10.980889000 | 19.312337000 | 34.626714000 |
| C | 8.270997000  | 18.731479000 | 34.896917000 |
| H | 8.475770000  | 19.254222000 | 33.956897000 |
| H | 8.023255000  | 19.476627000 | 35.658996000 |
| H | 7.400607000  | 18.085246000 | 34.752378000 |
| C | 12.386412000 | 15.043325000 | 37.409173000 |
| C | 13.667650000 | 15.867767000 | 37.554153000 |
| H | 13.862484000 | 16.430296000 | 36.636076000 |
| H | 14.527098000 | 15.218361000 | 37.749923000 |
| H | 13.578051000 | 16.581265000 | 38.378298000 |
| C | 12.519339000 | 14.074613000 | 36.234750000 |
| H | 11.600839000 | 13.494979000 | 36.110829000 |
| H | 13.347046000 | 13.376017000 | 36.395131000 |
| H | 12.708513000 | 14.625353000 | 35.308270000 |
| C | 12.090756000 | 14.284960000 | 38.703333000 |
| H | 11.985536000 | 14.975917000 | 39.543941000 |
| H | 12.902785000 | 13.587060000 | 38.930633000 |
| H | 11.163981000 | 13.711189000 | 38.611490000 |
| C | 9.525512000  | 17.400260000 | 39.797261000 |
| C | 10.873051000 | 18.059734000 | 39.502581000 |
| H | 11.697688000 | 17.370840000 | 39.701528000 |
| H | 11.001406000 | 18.939346000 | 40.142187000 |
| H | 10.936513000 | 18.380049000 | 38.461130000 |
| C | 8.387691000  | 18.390088000 | 39.539695000 |
| H | 7.419704000  | 17.942846000 | 39.788643000 |
| H | 8.371455000  | 18.678801000 | 38.487096000 |
| H | 8.507712000  | 19.287660000 | 40.155792000 |
| C | 9.497717000  | 16.928499000 | 41.252606000 |
| H | 10.286398000 | 16.192792000 | 41.434601000 |
| H | 8.535265000  | 16.467039000 | 41.498765000 |
| H | 9.645815000  | 17.771518000 | 41.935193000 |
| C | 11.676800000 | 9.040866000  | 37.946099000 |
| C | 12.839450000 | 8.231712000  | 37.366054000 |
| H | 12.613479000 | 7.160991000  | 37.402625000 |
| H | 13.753580000 | 8.403366000  | 37.944732000 |
| H | 13.018126000 | 8.516182000  | 36.327149000 |
| C | 11.370416000 | 8.566831000  | 39.367227000 |
| H | 10.539317000 | 9.135730000  | 39.791543000 |
| H | 12.245593000 | 8.693143000  | 40.012988000 |
| H | 11.094775000 | 7.507885000  | 39.364670000 |
| C | 12.004910000 | 10.532827000 | 37.946817000 |
| H | 12.227942000 | 10.879252000 | 36.934023000 |
| H | 12.877219000 | 10.734308000 | 38.577628000 |
| H | 11.159019000 | 11.108140000 | 38.333414000 |
| C | 11.614838000 | 9.954404000  | 33.461878000 |
| C | 12.812283000 | 9.167982000  | 32.923294000 |
| H | 13.669686000 | 9.272099000  | 33.595147000 |
| H | 13.103342000 | 9.531377000  | 31.932384000 |
| H | 12.568842000 | 8.104391000  | 32.843784000 |
| C | 11.976382000 | 11.432987000 | 33.600384000 |
| H | 11.128006000 | 11.996728000 | 33.998571000 |
| H | 12.252166000 | 11.860999000 | 32.631145000 |
| H | 12.823829000 | 11.553313000 | 34.281753000 |
| C | 10.407397000 | 9.778425000  | 32.542584000 |
| H | 10.136864000 | 8.721882000  | 32.459709000 |
| H | 10.631363000 | 10.155464000 | 31.540387000 |
| H | 9.544092000  | 10.334269000 | 32.918220000 |
| C | 8.954271000  | 6.831873000  | 35.142376000 |
| C | 8.510153000  | 6.304374000  | 36.508252000 |
| H | 8.525398000  | 5.209342000  | 36.528969000 |
| H | 7.489997000  | 6.635166000  | 36.730047000 |
| H | 9.173896000  | 6.685997000  | 37.286752000 |
| C | 10.373345000 | 6.358439000  | 34.824404000 |

|   |              |              |              |
|---|--------------|--------------|--------------|
| H | 10.407317000 | 5.263806000  | 34.818184000 |
| H | 11.082193000 | 6.720264000  | 35.571145000 |
| H | 10.695426000 | 6.716900000  | 33.843403000 |
| C | 8.001132000  | 6.344211000  | 34.049508000 |
| H | 6.968654000  | 6.627981000  | 34.278579000 |
| H | 8.030055000  | 5.253260000  | 33.966226000 |
| H | 8.274833000  | 6.772220000  | 33.080197000 |
| C | 9.024528000  | 13.739609000 | 30.392748000 |
| C | 10.336154000 | 13.115855000 | 29.913736000 |
| H | 10.899850000 | 12.718070000 | 30.762038000 |
| H | 10.955706000 | 13.859628000 | 29.402115000 |
| H | 10.137305000 | 12.295495000 | 29.217225000 |
| C | 9.306272000  | 14.853901000 | 31.397850000 |
| H | 8.371823000  | 15.306677000 | 31.739595000 |
| H | 9.918969000  | 15.638843000 | 30.941963000 |
| H | 9.842105000  | 14.460192000 | 32.266282000 |
| C | 8.229498000  | 14.276599000 | 29.200354000 |
| H | 8.056833000  | 13.481341000 | 28.467856000 |
| H | 8.778195000  | 15.082721000 | 28.701281000 |
| H | 7.262975000  | 14.660550000 | 29.534078000 |
| C | 6.003101000  | 10.461530000 | 30.674336000 |
| C | 7.276021000  | 9.767698000  | 30.185538000 |
| H | 8.046639000  | 10.507580000 | 29.963435000 |
| H | 7.073343000  | 9.177804000  | 29.284893000 |
| H | 7.660464000  | 9.093780000  | 30.957721000 |
| C | 5.455354000  | 11.405062000 | 29.602885000 |
| H | 4.544852000  | 11.900638000 | 29.950289000 |
| H | 5.217262000  | 10.841960000 | 28.694236000 |
| H | 6.187444000  | 12.173745000 | 29.348744000 |
| C | 4.941515000  | 9.416184000  | 31.021655000 |
| H | 5.325196000  | 8.693698000  | 31.749804000 |
| H | 4.647459000  | 8.853958000  | 30.129459000 |
| H | 4.048744000  | 9.893391000  | 31.436136000 |
| C | 4.928260000  | 14.573831000 | 32.234137000 |
| C | 5.488335000  | 15.646770000 | 33.167603000 |
| H | 6.115091000  | 15.189916000 | 33.938401000 |
| H | 4.678306000  | 16.189541000 | 33.663323000 |
| H | 6.092643000  | 16.363810000 | 32.602895000 |
| C | 4.081723000  | 13.571810000 | 33.019603000 |
| H | 3.694111000  | 12.792186000 | 32.357657000 |
| H | 3.234663000  | 14.075420000 | 33.495527000 |
| H | 4.679342000  | 13.101946000 | 33.807006000 |
| C | 4.093172000  | 15.218629000 | 31.126175000 |
| H | 4.704790000  | 15.915959000 | 30.545642000 |
| H | 3.247199000  | 15.770359000 | 31.548835000 |
| H | 3.705262000  | 14.455940000 | 30.444133000 |

### Cs<sub>2</sub>-2 (AF)

|    |              |              |              |
|----|--------------|--------------|--------------|
| U  | -2.040684000 | -0.745371000 | -0.128098000 |
| U  | 1.966948000  | 0.777332000  | -0.135530000 |
| Cs | -1.598295000 | 2.994871000  | 0.405165000  |
| Cs | 1.438357000  | -3.030541000 | 0.091598000  |
| Si | -3.985406000 | 1.588532000  | -2.447906000 |
| Si | -3.037023000 | 0.723875000  | 3.268781000  |
| Si | -2.214822000 | -4.557406000 | -0.227252000 |
| Si | 1.771556000  | 4.635037000  | -0.283395000 |
| Si | 3.826000000  | -0.984434000 | 2.740286000  |
| Si | 3.549057000  | -1.319543000 | -2.963176000 |
| O  | -0.010621000 | -0.045247000 | -0.112254000 |
| O  | -3.184118000 | 0.436448000  | -1.618260000 |
| O  | -2.905226000 | 2.203783000  | -3.564431000 |
| O  | -4.418279000 | 2.887583000  | -1.459351000 |
| O  | -5.409979000 | 1.074462000  | -3.159614000 |
| O  | -2.761054000 | 0.222821000  | 1.740278000  |

|   |              |              |              |
|---|--------------|--------------|--------------|
| O | -2.181615000 | 2.175976000  | 3.394813000  |
| O | -4.616091000 | 1.147062000  | 3.622752000  |
| O | -2.620120000 | -0.392052000 | 4.438056000  |
| O | -1.797730000 | -2.988227000 | -0.379921000 |
| O | -3.299726000 | -4.913840000 | 0.990764000  |
| O | -2.891404000 | -5.234730000 | -1.602926000 |
| O | -0.780635000 | -5.345677000 | 0.199085000  |
| O | 1.640569000  | 3.035065000  | 0.004890000  |
| O | 1.662747000  | 5.079503000  | -1.891751000 |
| O | 3.180654000  | 5.351719000  | 0.262450000  |
| O | 0.400102000  | 5.338180000  | 0.423745000  |
| O | 2.949777000  | -0.228546000 | 1.590823000  |
| O | 3.420637000  | -0.630099000 | 4.322838000  |
| O | 5.470954000  | -0.689740000 | 2.659421000  |
| O | 3.470132000  | -2.630045000 | 2.563904000  |
| O | 2.835891000  | -0.411283000 | -1.810856000 |
| O | 5.207803000  | -1.179444000 | -3.108014000 |
| O | 3.298998000  | -2.925561000 | -2.484362000 |
| O | 2.960852000  | -1.035576000 | -4.503593000 |
| C | -2.988172000 | 3.336970000  | -4.441428000 |
| C | -4.381658000 | 3.492816000  | -5.053422000 |
| H | -4.664146000 | 2.597516000  | -5.613420000 |
| H | -4.392617000 | 4.343866000  | -5.742780000 |
| H | -5.137877000 | 3.666837000  | -4.285010000 |
| C | -1.965525000 | 3.077509000  | -5.548698000 |
| H | -0.966835000 | 2.960794000  | -5.119940000 |
| H | -1.942545000 | 3.909225000  | -6.260428000 |
| H | -2.216085000 | 2.161918000  | -6.093333000 |
| C | -2.606955000 | 4.593857000  | -3.656958000 |
| H | -1.601814000 | 4.486164000  | -3.238075000 |
| H | -3.315149000 | 4.754048000  | -2.840008000 |
| H | -2.612373000 | 5.476959000  | -4.304974000 |
| C | -5.668139000 | 3.179174000  | -0.803199000 |
| C | -5.355785000 | 4.265693000  | 0.228269000  |
| H | -4.697802000 | 3.882166000  | 1.014455000  |
| H | -6.274194000 | 4.613091000  | 0.712097000  |
| H | -4.878023000 | 5.124963000  | -0.253962000 |
| C | -6.669411000 | 3.714440000  | -1.828717000 |
| H | -6.859083000 | 2.962881000  | -2.597912000 |
| H | -6.279273000 | 4.619264000  | -2.306259000 |
| H | -7.618175000 | 3.968658000  | -1.343968000 |
| C | -6.217201000 | 1.935906000  | -0.104408000 |
| H | -6.430747000 | 1.152950000  | -0.835366000 |
| H | -7.147903000 | 2.177198000  | 0.420081000  |
| H | -5.498490000 | 1.553985000  | 0.626437000  |
| C | -5.707430000 | -0.141863000 | -3.862835000 |
| C | -6.927793000 | 0.169220000  | -4.731151000 |
| H | -7.761151000 | 0.508354000  | -4.108339000 |
| H | -7.248759000 | -0.719977000 | -5.283395000 |
| H | -6.695144000 | 0.959219000  | -5.451185000 |
| C | -6.048064000 | -1.226930000 | -2.840026000 |
| H | -5.191146000 | -1.416484000 | -2.188573000 |
| H | -6.321887000 | -2.162534000 | -3.339077000 |
| H | -6.892532000 | -0.912844000 | -2.218525000 |
| C | -4.528581000 | -0.573408000 | -4.736394000 |
| H | -4.280537000 | 0.202895000  | -5.465285000 |
| H | -4.773152000 | -1.491095000 | -5.281155000 |
| H | -3.643364000 | -0.764300000 | -4.123053000 |
| C | -2.219108000 | 3.166043000  | 4.442774000  |
| C | -0.864321000 | 3.875121000  | 4.395927000  |
| H | -0.688283000 | 4.330720000  | 3.416729000  |
| H | -0.054523000 | 3.165894000  | 4.590533000  |
| H | -0.817033000 | 4.668076000  | 5.149692000  |
| C | -3.353995000 | 4.148545000  | 4.142863000  |

|   |              |              |              |
|---|--------------|--------------|--------------|
| H | -3.198460000 | 4.635818000  | 3.174144000  |
| H | -3.403801000 | 4.933048000  | 4.905532000  |
| H | -4.308404000 | 3.618193000  | 4.114290000  |
| C | -2.421139000 | 2.535126000  | 5.820623000  |
| H | -2.420672000 | 3.314769000  | 6.589743000  |
| H | -1.618525000 | 1.829570000  | 6.048682000  |
| H | -3.372718000 | 2.001992000  | 5.872118000  |
| C | -5.736444000 | 0.342883000  | 4.029047000  |
| C | -6.974213000 | 1.208913000  | 3.790928000  |
| H | -7.881614000 | 0.682186000  | 4.103900000  |
| H | -7.066966000 | 1.462993000  | 2.732074000  |
| H | -6.901366000 | 2.139002000  | 4.363145000  |
| C | -5.613363000 | 0.005844000  | 5.517132000  |
| H | -4.696737000 | -0.556885000 | 5.704804000  |
| H | -6.471231000 | -0.589404000 | 5.848286000  |
| H | -5.588488000 | 0.923599000  | 6.113682000  |
| C | -5.805887000 | -0.931281000 | 3.189426000  |
| H | -5.864757000 | -0.685584000 | 2.125356000  |
| H | -6.684978000 | -1.526450000 | 3.457542000  |
| H | -4.915144000 | -1.543317000 | 3.356666000  |
| C | -1.448692000 | -1.212786000 | 4.584869000  |
| C | -1.266157000 | -1.411857000 | 6.091125000  |
| H | -1.083811000 | -0.454734000 | 6.588012000  |
| H | -0.417372000 | -2.072613000 | 6.293788000  |
| H | -2.165211000 | -1.857446000 | 6.527781000  |
| C | -1.716360000 | -2.558337000 | 3.910924000  |
| H | -2.609128000 | -3.027548000 | 4.334965000  |
| H | -0.872027000 | -3.240461000 | 4.056239000  |
| H | -1.875228000 | -2.434757000 | 2.835583000  |
| C | -0.219472000 | -0.536432000 | 3.983242000  |
| H | -0.320288000 | -0.424100000 | 2.899128000  |
| H | 0.687870000  | -1.112108000 | 4.183096000  |
| H | -0.085124000 | 0.460651000  | 4.411415000  |
| C | -4.737581000 | -4.908669000 | 1.009306000  |
| C | -5.283525000 | -3.690999000 | 0.263705000  |
| H | -4.902336000 | -2.764551000 | 0.704980000  |
| H | -6.377098000 | -3.665886000 | 0.314179000  |
| H | -4.992458000 | -3.725403000 | -0.789933000 |
| C | -5.262583000 | -6.200418000 | 0.377199000  |
| H | -6.357768000 | -6.214806000 | 0.388578000  |
| H | -4.909124000 | -7.071772000 | 0.937958000  |
| H | -4.917981000 | -6.284984000 | -0.655536000 |
| C | -5.127369000 | -4.853109000 | 2.486519000  |
| H | -4.707131000 | -5.710720000 | 3.020801000  |
| H | -6.215852000 | -4.874001000 | 2.602135000  |
| H | -4.746045000 | -3.939640000 | 2.949765000  |
| C | -2.515746000 | -5.154627000 | -2.982981000 |
| C | -0.995363000 | -5.127084000 | -3.141372000 |
| H | -0.582074000 | -4.229025000 | -2.673005000 |
| H | -0.721258000 | -5.114486000 | -4.201563000 |
| H | -0.540946000 | -6.005676000 | -2.675636000 |
| C | -3.137322000 | -3.896953000 | -3.588833000 |
| H | -4.224931000 | -3.920442000 | -3.474534000 |
| H | -2.904653000 | -3.818032000 | -4.656029000 |
| H | -2.757313000 | -3.005293000 | -3.083362000 |
| C | -3.094419000 | -6.406003000 | -3.646845000 |
| H | -2.663480000 | -7.309959000 | -3.206100000 |
| H | -2.884895000 | -6.410085000 | -4.721437000 |
| H | -4.178811000 | -6.441759000 | -3.506178000 |
| C | -0.607938000 | -6.666518000 | 0.750270000  |
| C | -1.609116000 | -7.666433000 | 0.170331000  |
| H | -1.421409000 | -8.663854000 | 0.581747000  |
| H | -1.520241000 | -7.721462000 | -0.917762000 |
| H | -2.632270000 | -7.379134000 | 0.417203000  |

|   |              |              |              |
|---|--------------|--------------|--------------|
| C | -0.758209000 | -6.578746000 | 2.270594000  |
| H | -0.028355000 | -5.876017000 | 2.686020000  |
| H | -0.594057000 | -7.555925000 | 2.737562000  |
| H | -1.759860000 | -6.226027000 | 2.525642000  |
| C | 0.811221000  | -7.098150000 | 0.375993000  |
| H | 1.550685000  | -6.396793000 | 0.775289000  |
| H | 0.927951000  | -7.142306000 | -0.711012000 |
| H | 1.036202000  | -8.087362000 | 0.787207000  |
| C | 2.670581000  | 5.175183000  | -2.910973000 |
| C | 3.678839000  | 4.035348000  | -2.786568000 |
| H | 4.202160000  | 4.087377000  | -1.827645000 |
| H | 4.423832000  | 4.092296000  | -3.586429000 |
| H | 3.174959000  | 3.067359000  | -2.860800000 |
| C | 3.373272000  | 6.529812000  | -2.793242000 |
| H | 3.860623000  | 6.618100000  | -1.819346000 |
| H | 2.648960000  | 7.344036000  | -2.898966000 |
| H | 4.128859000  | 6.643985000  | -3.577966000 |
| C | 1.923649000  | 5.078699000  | -4.241747000 |
| H | 2.616719000  | 5.170181000  | -5.084435000 |
| H | 1.179189000  | 5.876952000  | -4.319635000 |
| H | 1.406775000  | 4.118038000  | -4.320057000 |
| C | 3.883067000  | 5.245752000  | 1.508726000  |
| C | 4.666205000  | 6.551744000  | 1.661512000  |
| H | 5.341975000  | 6.691226000  | 0.812319000  |
| H | 5.262984000  | 6.540827000  | 2.579334000  |
| H | 3.986933000  | 7.408088000  | 1.700983000  |
| C | 4.848751000  | 4.064624000  | 1.422868000  |
| H | 4.298262000  | 3.128169000  | 1.301169000  |
| H | 5.456230000  | 3.990445000  | 2.330751000  |
| H | 5.521053000  | 4.185612000  | 0.567919000  |
| C | 2.913377000  | 5.065615000  | 2.676788000  |
| H | 2.218306000  | 5.907265000  | 2.738039000  |
| H | 3.461426000  | 5.001200000  | 3.622173000  |
| H | 2.331862000  | 4.147039000  | 2.556008000  |
| C | -0.094336000 | 6.688527000  | 0.291376000  |
| C | 1.037554000  | 7.716111000  | 0.272106000  |
| H | 1.626079000  | 7.667329000  | 1.191448000  |
| H | 0.620171000  | 8.724971000  | 0.186804000  |
| H | 1.706803000  | 7.547919000  | -0.573574000 |
| C | -0.920515000 | 6.794943000  | -0.992095000 |
| H | -1.762459000 | 6.094970000  | -0.974435000 |
| H | -0.298879000 | 6.562433000  | -1.858741000 |
| H | -1.330601000 | 7.804168000  | -1.105610000 |
| C | -0.981680000 | 6.930619000  | 1.514130000  |
| H | -0.404847000 | 6.823155000  | 2.437314000  |
| H | -1.812730000 | 6.217755000  | 1.544625000  |
| H | -1.409690000 | 7.937973000  | 1.488172000  |
| C | 3.851867000  | 0.428749000  | 5.194766000  |
| C | 5.220346000  | 0.076166000  | 5.782765000  |
| H | 5.160766000  | -0.858663000 | 6.349538000  |
| H | 5.561443000  | 0.863087000  | 6.464213000  |
| H | 5.954981000  | -0.044072000 | 4.983989000  |
| C | 2.808354000  | 0.503430000  | 6.310179000  |
| H | 1.825143000  | 0.750779000  | 5.901814000  |
| H | 3.083525000  | 1.267678000  | 7.044386000  |
| H | 2.732389000  | -0.458085000 | 6.827157000  |
| C | 3.914384000  | 1.755424000  | 4.440346000  |
| H | 4.660202000  | 1.708965000  | 3.642419000  |
| H | 4.188799000  | 2.569993000  | 5.119145000  |
| H | 2.942366000  | 1.988844000  | 3.997272000  |
| C | 6.390456000  | -0.691934000 | 1.558122000  |
| C | 7.763903000  | -0.992175000 | 2.163149000  |
| H | 8.018309000  | -0.243794000 | 2.919882000  |
| H | 8.539589000  | -0.979993000 | 1.390575000  |



|   |              |              |              |
|---|--------------|--------------|--------------|
| H | 7.767650000  | -1.975979000 | 2.641390000  |
| C | 6.393158000  | 0.698196000  | 0.922374000  |
| H | 5.412938000  | 0.926229000  | 0.494072000  |
| H | 7.140259000  | 0.762009000  | 0.124558000  |
| H | 6.627831000  | 1.457778000  | 1.673927000  |
| C | 6.018643000  | -1.756123000 | 0.527641000  |
| H | 6.009644000  | -2.749169000 | 0.985980000  |
| H | 6.737492000  | -1.763179000 | -0.296268000 |
| H | 5.032343000  | -1.557993000 | 0.099481000  |
| C | 3.784687000  | -3.709324000 | 3.467210000  |
| C | 2.720400000  | -3.763504000 | 4.565626000  |
| H | 2.894509000  | -4.613153000 | 5.234687000  |
| H | 1.724608000  | -3.875697000 | 4.124124000  |
| H | 2.736748000  | -2.840432000 | 5.148558000  |
| C | 5.177852000  | -3.559313000 | 4.080284000  |
| H | 5.379083000  | -4.398954000 | 4.754042000  |
| H | 5.258560000  | -2.633161000 | 4.651779000  |
| H | 5.947872000  | -3.552008000 | 3.304399000  |
| C | 3.738916000  | -4.985820000 | 2.625498000  |
| H | 2.735177000  | -5.145452000 | 2.218775000  |
| H | 3.989486000  | -5.861628000 | 3.232158000  |
| H | 4.450305000  | -4.925969000 | 1.795775000  |
| C | 6.029802000  | -0.265207000 | -3.850899000 |
| C | 7.426552000  | -0.373085000 | -3.237078000 |
| H | 7.404718000  | -0.078602000 | -2.184203000 |
| H | 8.133482000  | 0.275697000  | -3.764328000 |
| H | 7.792271000  | -1.402654000 | -3.299329000 |
| C | 5.502722000  | 1.161519000  | -3.716939000 |
| H | 4.503576000  | 1.243519000  | -4.152671000 |
| H | 6.160413000  | 1.865967000  | -4.237232000 |
| H | 5.449534000  | 1.453113000  | -2.664137000 |
| C | 6.068358000  | -0.689633000 | -5.321099000 |
| H | 6.476643000  | -1.701054000 | -5.416212000 |
| H | 6.704953000  | -0.012189000 | -5.900529000 |
| H | 5.061419000  | -0.678069000 | -5.743830000 |
| C | 3.933550000  | -4.113794000 | -3.003238000 |
| C | 5.311343000  | -4.271626000 | -2.357036000 |
| H | 5.946256000  | -3.422067000 | -2.613511000 |
| H | 5.792336000  | -5.196095000 | -2.694873000 |
| H | 5.216670000  | -4.312328000 | -1.267276000 |
| C | 4.054043000  | -4.066803000 | -4.526951000 |
| H | 3.069668000  | -3.970206000 | -4.992974000 |
| H | 4.520728000  | -4.987239000 | -4.893689000 |
| H | 4.666298000  | -3.220841000 | -4.844453000 |
| C | 3.033179000  | -5.283527000 | -2.601674000 |
| H | 2.980002000  | -5.382403000 | -1.512261000 |
| H | 3.427485000  | -6.225950000 | -2.995074000 |
| H | 2.021089000  | -5.144885000 | -2.993118000 |
| C | 1.629982000  | -0.746795000 | -4.956240000 |
| C | 1.398508000  | 0.760699000  | -4.862235000 |
| H | 1.476714000  | 1.090283000  | -3.822442000 |
| H | 0.403839000  | 1.024260000  | -5.233094000 |
| H | 2.144656000  | 1.297477000  | -5.456620000 |
| C | 0.589075000  | -1.503571000 | -4.131194000 |
| H | 0.781927000  | -2.579589000 | -4.168079000 |
| H | -0.417242000 | -1.318270000 | -4.519570000 |
| H | 0.614207000  | -1.174362000 | -3.087686000 |
| C | 1.581715000  | -1.200306000 | -6.416801000 |
| H | 2.353609000  | -0.687877000 | -6.998943000 |
| H | 0.606700000  | -0.976390000 | -6.861545000 |
| H | 1.757976000  | -2.277687000 | -6.490803000 |

**K<sub>2</sub>-N<sub>2</sub>**

|    |              |              |              |
|----|--------------|--------------|--------------|
| U  | 7.627816000  | 10.993907000 | 5.501173000  |
| U  | 6.981550000  | 8.166247000  | 7.153194000  |
| K  | 8.158414000  | 14.105198000 | 3.785329000  |
| K  | 6.399921000  | 5.035345000  | 8.824771000  |
| Si | 7.387911000  | 7.620937000  | 10.910938000 |
| Si | 3.607315000  | 6.373717000  | 7.142407000  |
| Si | 8.897421000  | 4.974086000  | 6.321407000  |
| Si | 7.960830000  | 11.275144000 | 1.696627000  |
| Si | 10.665602000 | 13.249365000 | 6.020449000  |
| Si | 5.206116000  | 13.939179000 | 5.717362000  |
| O  | 7.355783000  | 7.611239000  | 9.274004000  |
| O  | 6.515308000  | 9.205179000  | 5.371888000  |
| N  | 7.526290000  | 10.298939000 | 7.536586000  |
| N  | 8.588837000  | 9.581465000  | 6.941258000  |
| O  | 8.839327000  | 8.052044000  | 11.600818000 |
| O  | 6.233749000  | 8.563026000  | 11.649781000 |
| O  | 6.963416000  | 6.020447000  | 11.294394000 |
| O  | 4.987771000  | 7.209473000  | 7.419639000  |
| O  | 2.210730000  | 7.163882000  | 7.595133000  |
| O  | 3.820332000  | 4.933316000  | 8.015601000  |
| O  | 3.360123000  | 5.869676000  | 5.576910000  |
| O  | 7.870320000  | 6.229338000  | 6.553041000  |
| O  | 8.331471000  | 3.775387000  | 7.379612000  |
| O  | 8.966434000  | 4.425479000  | 4.749556000  |
| O  | 10.476368000 | 5.221192000  | 6.781917000  |
| O  | 8.073377000  | 11.195829000 | 3.328039000  |
| O  | 6.476477000  | 10.902507000 | 1.046019000  |
| O  | 9.066587000  | 10.336414000 | 0.874960000  |
| O  | 8.164309000  | 12.924893000 | 1.352907000  |
| O  | 9.213985000  | 12.519474000 | 5.816155000  |
| O  | 11.988788000 | 12.392451000 | 5.490718000  |
| O  | 10.556048000 | 14.581800000 | 4.970419000  |
| O  | 11.021169000 | 13.719477000 | 7.576752000  |
| O  | 6.151003000  | 12.643555000 | 5.384168000  |
| O  | 3.594174000  | 13.730312000 | 5.348184000  |
| O  | 5.898116000  | 15.198717000 | 4.815485000  |
| O  | 5.241665000  | 14.487471000 | 7.286434000  |
| C  | 10.199004000 | 7.782672000  | 11.214543000 |
| C  | 11.018516000 | 7.905400000  | 12.500779000 |
| H  | 10.885071000 | 8.897780000  | 12.941828000 |
| H  | 12.084079000 | 7.758929000  | 12.296566000 |
| H  | 10.701267000 | 7.159112000  | 13.235610000 |
| C  | 10.334715000 | 6.377789000  | 10.628885000 |
| H  | 9.967026000  | 5.627548000  | 11.335405000 |
| H  | 11.384030000 | 6.156093000  | 10.410362000 |
| H  | 9.774981000  | 6.288783000  | 9.693847000  |
| C  | 10.638779000 | 8.837696000  | 10.201051000 |
| H  | 10.030067000 | 8.797590000  | 9.293663000  |
| H  | 11.688193000 | 8.688708000  | 9.924979000  |
| H  | 10.542500000 | 9.838638000  | 10.632394000 |
| C  | 6.262967000  | 9.927211000  | 12.111503000 |
| C  | 7.104381000  | 10.805721000 | 11.189226000 |
| H  | 8.154778000  | 10.508472000 | 11.228771000 |
| H  | 7.033715000  | 11.853422000 | 11.499622000 |
| H  | 6.773210000  | 10.729095000 | 10.150049000 |
| C  | 4.804308000  | 10.385715000 | 12.108890000 |
| H  | 4.397433000  | 10.347878000 | 11.094754000 |
| H  | 4.719435000  | 11.411839000 | 12.481259000 |
| H  | 4.198059000  | 9.735584000  | 12.747646000 |
| C  | 6.824795000  | 9.947151000  | 13.534419000 |
| H  | 6.215987000  | 9.322945000  | 14.196863000 |
| H  | 6.827318000  | 10.966697000 | 13.934873000 |
| H  | 7.850550000  | 9.569603000  | 13.538079000 |

|   |              |              |              |
|---|--------------|--------------|--------------|
| C | 6.597811000  | 5.452004000  | 12.567874000 |
| C | 7.500243000  | 5.965314000  | 13.690103000 |
| H | 8.548099000  | 5.729453000  | 13.486154000 |
| H | 7.219984000  | 5.496976000  | 14.639516000 |
| H | 7.410305000  | 7.047641000  | 13.801819000 |
| C | 5.132216000  | 5.780746000  | 12.860291000 |
| H | 4.994424000  | 6.861917000  | 12.921751000 |
| H | 4.813227000  | 5.322969000  | 13.802996000 |
| H | 4.488772000  | 5.399867000  | 12.060413000 |
| C | 6.779794000  | 3.939590000  | 12.413883000 |
| H | 6.115331000  | 3.542060000  | 11.637762000 |
| H | 6.538371000  | 3.422229000  | 13.347781000 |
| H | 7.814229000  | 3.702194000  | 12.146439000 |
| C | 1.908603000  | 7.970979000  | 8.745673000  |
| C | 2.355969000  | 9.404334000  | 8.464310000  |
| H | 3.437630000  | 9.443768000  | 8.315063000  |
| H | 2.095672000  | 10.063843000 | 9.298550000  |
| H | 1.867235000  | 9.784213000  | 7.562149000  |
| C | 0.387980000  | 7.910783000  | 8.901392000  |
| H | -0.101368000 | 8.270654000  | 7.991295000  |
| H | 0.058618000  | 8.532464000  | 9.740124000  |
| H | 0.058951000  | 6.883169000  | 9.082141000  |
| C | 2.596205000  | 7.430507000  | 9.999467000  |
| H | 2.309399000  | 6.390392000  | 10.180399000 |
| H | 2.308785000  | 8.022014000  | 10.874553000 |
| H | 3.684405000  | 7.484492000  | 9.905263000  |
| C | 3.033696000  | 3.723310000  | 7.977570000  |
| C | 1.536556000  | 4.026571000  | 7.915174000  |
| H | 1.219063000  | 4.609125000  | 8.783923000  |
| H | 0.967862000  | 3.090836000  | 7.902348000  |
| H | 1.288167000  | 4.591884000  | 7.014690000  |
| C | 3.352093000  | 2.979352000  | 9.277370000  |
| H | 4.411276000  | 2.700058000  | 9.322588000  |
| H | 2.769047000  | 2.055714000  | 9.347143000  |
| H | 3.116460000  | 3.602316000  | 10.145633000 |
| C | 3.462025000  | 2.886096000  | 6.770930000  |
| H | 3.272155000  | 3.435099000  | 5.847043000  |
| H | 2.914214000  | 1.937874000  | 6.745458000  |
| H | 4.532229000  | 2.660208000  | 6.820741000  |
| C | 2.749384000  | 6.531759000  | 4.453747000  |
| C | 1.237380000  | 6.304247000  | 4.517282000  |
| H | 1.010546000  | 5.233037000  | 4.503639000  |
| H | 0.739603000  | 6.767676000  | 3.658654000  |
| H | 0.828901000  | 6.737157000  | 5.433947000  |
| C | 3.337894000  | 5.859943000  | 3.213231000  |
| H | 4.419406000  | 6.014826000  | 3.175719000  |
| H | 2.894176000  | 6.273923000  | 2.301974000  |
| H | 3.142393000  | 4.783208000  | 3.233218000  |
| C | 3.073267000  | 8.023043000  | 4.457776000  |
| H | 2.631404000  | 8.508370000  | 5.332254000  |
| H | 2.661934000  | 8.499968000  | 3.562522000  |
| H | 4.153214000  | 8.194042000  | 4.475087000  |
| C | 8.972663000  | 2.542765000  | 7.774850000  |
| C | 9.954713000  | 2.837671000  | 8.909658000  |
| H | 10.727498000 | 3.527663000  | 8.565791000  |
| H | 10.427711000 | 1.914106000  | 9.260892000  |
| H | 9.436213000  | 3.298623000  | 9.756608000  |
| C | 7.846713000  | 1.630835000  | 8.269103000  |
| H | 7.343667000  | 2.064580000  | 9.141272000  |
| H | 8.241400000  | 0.655845000  | 8.571891000  |
| H | 7.104586000  | 1.472449000  | 7.480558000  |
| C | 9.693675000  | 1.880870000  | 6.600638000  |
| H | 8.998800000  | 1.669848000  | 5.783795000  |
| H | 10.143201000 | 0.936361000  | 6.924563000  |

|   |              |              |              |
|---|--------------|--------------|--------------|
| H | 10.487775000 | 2.525126000  | 6.217489000  |
| C | 7.937167000  | 4.210537000  | 3.770297000  |
| C | 6.657795000  | 3.681456000  | 4.417990000  |
| H | 6.859179000  | 2.763202000  | 4.977335000  |
| H | 5.908642000  | 3.457881000  | 3.651792000  |
| H | 6.226512000  | 4.421705000  | 5.097675000  |
| C | 8.506891000  | 3.178386000  | 2.795215000  |
| H | 9.440933000  | 3.544042000  | 2.358238000  |
| H | 7.799522000  | 2.980202000  | 1.983555000  |
| H | 8.716861000  | 2.235736000  | 3.309361000  |
| C | 7.669800000  | 5.530370000  | 3.050349000  |
| H | 7.289569000  | 6.280974000  | 3.747859000  |
| H | 6.934508000  | 5.393109000  | 2.251070000  |
| H | 8.593117000  | 5.909833000  | 2.602293000  |
| C | 11.564470000 | 5.852587000  | 6.080546000  |
| C | 12.205472000 | 4.830443000  | 5.139646000  |
| H | 12.569345000 | 3.967023000  | 5.706291000  |
| H | 13.057068000 | 5.273757000  | 4.612458000  |
| H | 11.476976000 | 4.483629000  | 4.403144000  |
| C | 11.067806000 | 7.070402000  | 5.305849000  |
| H | 10.357598000 | 6.769167000  | 4.530238000  |
| H | 11.906342000 | 7.576722000  | 4.817978000  |
| H | 10.577881000 | 7.782929000  | 5.975676000  |
| C | 12.558771000 | 6.276535000  | 7.161260000  |
| H | 12.097660000 | 6.999007000  | 7.839586000  |
| H | 13.444915000 | 6.736246000  | 6.711795000  |
| H | 12.880719000 | 5.408128000  | 7.744652000  |
| C | 5.895899000  | 9.639166000  | 0.673631000  |
| C | 4.382938000  | 9.847785000  | 0.739056000  |
| H | 4.077924000  | 10.096704000 | 1.758932000  |
| H | 3.854175000  | 8.941059000  | 0.427738000  |
| H | 4.081569000  | 10.666086000 | 0.077477000  |
| C | 6.325244000  | 8.535943000  | 1.636802000  |
| H | 7.401956000  | 8.360659000  | 1.562823000  |
| H | 5.812830000  | 7.600851000  | 1.389734000  |
| H | 6.086375000  | 8.798097000  | 2.671305000  |
| C | 6.327460000  | 9.308453000  | -0.756688000 |
| H | 6.007179000  | 10.097749000 | -1.444784000 |
| H | 5.879036000  | 8.365683000  | -1.088113000 |
| H | 7.415182000  | 9.216815000  | -0.810382000 |
| C | 10.460261000 | 10.080456000 | 1.114203000  |
| C | 10.579729000 | 8.945713000  | 2.130155000  |
| H | 10.133812000 | 9.238903000  | 3.083649000  |
| H | 11.629537000 | 8.686736000  | 2.301650000  |
| H | 10.061932000 | 8.053298000  | 1.766024000  |
| C | 11.035705000 | 9.646627000  | -0.235196000 |
| H | 10.496721000 | 8.772978000  | -0.613818000 |
| H | 12.094528000 | 9.385646000  | -0.139092000 |
| H | 10.943471000 | 10.450650000 | -0.971497000 |
| C | 11.174133000 | 11.333263000 | 1.621153000  |
| H | 11.049849000 | 12.160066000 | 0.915819000  |
| H | 12.245199000 | 11.139846000 | 1.737278000  |
| H | 10.785280000 | 11.640458000 | 2.595932000  |
| C | 7.933355000  | 13.627821000 | 0.112863000  |
| C | 8.421851000  | 12.821323000 | -1.090269000 |
| H | 9.491399000  | 12.609557000 | -1.011401000 |
| H | 8.250321000  | 13.386797000 | -2.012216000 |
| H | 7.888575000  | 11.871521000 | -1.165667000 |
| C | 6.439655000  | 13.932205000 | -0.016274000 |
| H | 5.869648000  | 13.001966000 | -0.049088000 |
| H | 6.240124000  | 14.509543000 | -0.925519000 |
| H | 6.091534000  | 14.516596000 | 0.841758000  |
| C | 8.732824000  | 14.929434000 | 0.217605000  |
| H | 8.366049000  | 15.553597000 | 1.040939000  |

|   |              |              |              |
|---|--------------|--------------|--------------|
| H | 8.638856000  | 15.516199000 | -0.701569000 |
| H | 9.793371000  | 14.717508000 | 0.384607000  |
| C | 12.868545000 | 11.480523000 | 6.177115000  |
| C | 13.446596000 | 10.578643000 | 5.086420000  |
| H | 12.645979000 | 10.018360000 | 4.595923000  |
| H | 14.162013000 | 9.866673000  | 5.510740000  |
| H | 13.962636000 | 11.176903000 | 4.328893000  |
| C | 12.110657000 | 10.653745000 | 7.212602000  |
| H | 11.742191000 | 11.292297000 | 8.018725000  |
| H | 12.773120000 | 9.899474000  | 7.649873000  |
| H | 11.250582000 | 10.144056000 | 6.769761000  |
| C | 13.982249000 | 12.289596000 | 6.845058000  |
| H | 14.531656000 | 12.875228000 | 6.100497000  |
| H | 14.693392000 | 11.625357000 | 7.348109000  |
| H | 13.558420000 | 12.970746000 | 7.587501000  |
| C | 11.589554000 | 15.484479000 | 4.528351000  |
| C | 12.371038000 | 14.826273000 | 3.389519000  |
| H | 12.847973000 | 13.909985000 | 3.742818000  |
| H | 13.138763000 | 15.505095000 | 3.002293000  |
| H | 11.697804000 | 14.565578000 | 2.566354000  |
| C | 10.860945000 | 16.731516000 | 4.020289000  |
| H | 10.211572000 | 16.487659000 | 3.171403000  |
| H | 11.575574000 | 17.487475000 | 3.679787000  |
| H | 10.249402000 | 17.169772000 | 4.815261000  |
| C | 12.525854000 | 15.868545000 | 5.673961000  |
| H | 11.969447000 | 16.335358000 | 6.490921000  |
| H | 13.279797000 | 16.579236000 | 5.319425000  |
| H | 13.040892000 | 14.991072000 | 6.069654000  |
| C | 10.194644000 | 14.252828000 | 8.626546000  |
| C | 9.137199000  | 15.200885000 | 8.062567000  |
| H | 9.607286000  | 16.001612000 | 7.483382000  |
| H | 8.563481000  | 15.657915000 | 8.874885000  |
| H | 8.433633000  | 14.665109000 | 7.419627000  |
| C | 11.149955000 | 15.012444000 | 9.549499000  |
| H | 11.930137000 | 14.342284000 | 9.922822000  |
| H | 10.611206000 | 15.426512000 | 10.407874000 |
| H | 11.633382000 | 15.835182000 | 9.013858000  |
| C | 9.541508000  | 13.092765000 | 9.375785000  |
| H | 8.897375000  | 12.503189000 | 8.717585000  |
| H | 8.939476000  | 13.468214000 | 10.210179000 |
| H | 10.308424000 | 12.428391000 | 9.785188000  |
| C | 2.946490000  | 13.108673000 | 4.226293000  |
| C | 2.848915000  | 11.608114000 | 4.492555000  |
| H | 3.844631000  | 11.166451000 | 4.581347000  |
| H | 2.314889000  | 11.104285000 | 3.680552000  |
| H | 2.304800000  | 11.423894000 | 5.423818000  |
| C | 3.709787000  | 13.377611000 | 2.929861000  |
| H | 3.824009000  | 14.453091000 | 2.765357000  |
| H | 3.170854000  | 12.955490000 | 2.075840000  |
| H | 4.700905000  | 12.916762000 | 2.957672000  |
| C | 1.550436000  | 13.730896000 | 4.162173000  |
| H | 1.019038000  | 13.569347000 | 5.104862000  |
| H | 0.962980000  | 13.284550000 | 3.353339000  |
| H | 1.616115000  | 14.809093000 | 3.988297000  |
| C | 5.629986000  | 16.616303000 | 4.887705000  |
| C | 6.098113000  | 17.195944000 | 3.550317000  |
| H | 7.174910000  | 17.044479000 | 3.410911000  |
| H | 5.913540000  | 18.274013000 | 3.508969000  |
| H | 5.567052000  | 16.723852000 | 2.717921000  |
| C | 4.139597000  | 16.898614000 | 5.077211000  |
| H | 3.553959000  | 16.475899000 | 4.256779000  |
| H | 3.966212000  | 17.979550000 | 5.103593000  |
| H | 3.777227000  | 16.469593000 | 6.013741000  |
| C | 6.439445000  | 17.216195000 | 6.038408000  |

|   |             |              |              |
|---|-------------|--------------|--------------|
| H | 6.132693000 | 16.768922000 | 6.985760000  |
| H | 6.293062000 | 18.300630000 | 6.089074000  |
| H | 7.507583000 | 17.021855000 | 5.898314000  |
| C | 4.520260000 | 14.042950000 | 8.450484000  |
| C | 3.158078000 | 14.739474000 | 8.478087000  |
| H | 3.286218000 | 15.826823000 | 8.493649000  |
| H | 2.594757000 | 14.451065000 | 9.372100000  |
| H | 2.576276000 | 14.468735000 | 7.593684000  |
| C | 5.365476000 | 14.476148000 | 9.647912000  |
| H | 6.344540000 | 13.991104000 | 9.615809000  |
| H | 4.872311000 | 14.205461000 | 10.587157000 |
| H | 5.514254000 | 15.560476000 | 9.637025000  |
| C | 4.352332000 | 12.525470000 | 8.438300000  |
| H | 3.753536000 | 12.211734000 | 7.578526000  |
| H | 3.838105000 | 12.195890000 | 9.346380000  |
| H | 5.324254000 | 12.025649000 | 8.394019000  |

#### K<sub>4</sub>-(N)<sub>2</sub>

|    |              |              |              |
|----|--------------|--------------|--------------|
| U  | 0.429550000  | 1.433897000  | -0.598765000 |
| U  | -1.573233000 | -1.161968000 | -0.093943000 |
| K  | 2.224096000  | -1.986637000 | -0.782203000 |
| K  | 1.931088000  | 0.079408000  | 2.546862000  |
| K  | 4.282079000  | 1.310736000  | -0.589450000 |
| K  | -3.057850000 | 2.125484000  | 0.735615000  |
| Si | -5.256415000 | -0.255727000 | -0.961474000 |
| Si | -0.363687000 | -4.650493000 | -0.918919000 |
| Si | -2.019739000 | -0.864045000 | 3.536799000  |
| Si | 5.336693000  | -0.454007000 | 2.003727000  |
| Si | 2.854003000  | 0.521637000  | -3.536201000 |
| Si | -0.804288000 | 4.955731000  | 0.318670000  |
| O  | -3.727900000 | -0.643966000 | -0.568221000 |
| O  | -5.511455000 | 1.270944000  | -0.252822000 |
| O  | -5.591940000 | -0.223374000 | -2.601144000 |
| O  | -6.454847000 | -1.226016000 | -0.320772000 |
| O  | 1.910709000  | 2.000399000  | 0.357419000  |
| O  | -0.723096000 | -3.066901000 | -1.008240000 |
| O  | -0.865866000 | -5.551036000 | -2.240764000 |
| O  | -0.957678000 | -5.485548000 | 0.402690000  |
| O  | 1.325010000  | -4.709394000 | -0.747203000 |
| O  | -2.232204000 | -1.392987000 | 2.021556000  |
| O  | -3.138470000 | -1.492719000 | 4.616246000  |
| O  | -0.518069000 | -1.199954000 | 4.238509000  |
| O  | -2.108479000 | 0.825497000  | 3.493886000  |
| O  | 4.159407000  | -0.880393000 | 1.009486000  |
| O  | 6.442792000  | -1.608844000 | 2.529335000  |
| O  | 4.570724000  | 0.267925000  | 3.353618000  |
| O  | 6.317488000  | 0.780485000  | 1.340332000  |
| O  | 1.946493000  | 0.672386000  | -2.210401000 |
| O  | 3.527060000  | -1.024406000 | -3.394401000 |
| O  | 4.188790000  | 1.569215000  | -3.481538000 |
| O  | 2.139753000  | 0.801092000  | -5.013799000 |
| O  | -0.729473000 | 3.366922000  | 0.004239000  |
| O  | 0.391900000  | 5.604462000  | 1.285940000  |
| O  | -0.801818000 | 5.928172000  | -1.052197000 |
| O  | -2.236939000 | 5.152107000  | 1.207064000  |
| N  | 0.215881000  | -0.328619000 | 0.514947000  |
| N  | -1.103741000 | 0.761799000  | -1.354609000 |
| C  | -6.754748000 | 1.980814000  | -0.070298000 |
| C  | -6.365280000 | 3.436648000  | 0.191419000  |
| H  | -7.255720000 | 4.061283000  | 0.315790000  |
| H  | -5.775735000 | 3.524644000  | 1.110330000  |
| H  | -5.780378000 | 3.837111000  | -0.643211000 |
| C  | -7.636259000 | 1.905456000  | -1.317350000 |
| H  | -8.562336000 | 2.466658000  | -1.153014000 |

|   |              |              |              |
|---|--------------|--------------|--------------|
| H | -7.123897000 | 2.334989000  | -2.182561000 |
| H | -7.897025000 | 0.872260000  | -1.553054000 |
| C | -7.488121000 | 1.410962000  | 1.145523000  |
| H | -8.412899000 | 1.967405000  | 1.334149000  |
| H | -7.729152000 | 0.359426000  | 0.980910000  |
| H | -6.857161000 | 1.482302000  | 2.037147000  |
| C | -3.912316000 | -0.828575000 | -4.216011000 |
| H | -3.367524000 | -0.504706000 | -5.109280000 |
| H | -3.184198000 | -1.077133000 | -3.440263000 |
| H | -4.479783000 | -1.729773000 | -4.468280000 |
| C | -4.851240000 | 0.273673000  | -3.724721000 |
| C | -4.056677000 | 1.527140000  | -3.359590000 |
| H | -3.586325000 | 1.949787000  | -4.253903000 |
| H | -4.717967000 | 2.287044000  | -2.932333000 |
| H | -3.258862000 | 1.294740000  | -2.645613000 |
| C | -5.896264000 | 0.593952000  | -4.796423000 |
| H | -5.415377000 | 0.937435000  | -5.718286000 |
| H | -6.490089000 | -0.295813000 | -5.027515000 |
| H | -6.576897000 | 1.377071000  | -4.449149000 |
| C | -7.073776000 | -2.423987000 | -0.816037000 |
| C | -6.067919000 | -3.298280000 | -1.564088000 |
| H | -6.536530000 | -4.236968000 | -1.878734000 |
| H | -5.698760000 | -2.782242000 | -2.453678000 |
| H | -5.219080000 | -3.537571000 | -0.919632000 |
| C | -8.234556000 | -2.038217000 | -1.735690000 |
| H | -8.754021000 | -2.931085000 | -2.100463000 |
| H | -8.959569000 | -1.419857000 | -1.196466000 |
| H | -7.860476000 | -1.474826000 | -2.594098000 |
| C | -7.595387000 | -3.158736000 | 0.420082000  |
| H | -8.114694000 | -4.079820000 | 0.135349000  |
| H | -6.767210000 | -3.416973000 | 1.085981000  |
| H | -8.295629000 | -2.524900000 | 0.973120000  |
| C | -0.862162000 | -5.247098000 | -3.641014000 |
| C | 0.470009000  | -4.619185000 | -4.053334000 |
| H | 0.493731000  | -4.443900000 | -5.134192000 |
| H | 0.612669000  | -3.658272000 | -3.550805000 |
| H | 1.302839000  | -5.277588000 | -3.790138000 |
| C | -2.022774000 | -4.302148000 | -3.953912000 |
| H | -2.064652000 | -4.074865000 | -5.024556000 |
| H | -2.973396000 | -4.760614000 | -3.664608000 |
| H | -1.907300000 | -3.367754000 | -3.400099000 |
| C | -1.057451000 | -6.586404000 | -4.354446000 |
| H | -1.091175000 | -6.448728000 | -5.440099000 |
| H | -0.238223000 | -7.271481000 | -4.116028000 |
| H | -1.995362000 | -7.051206000 | -4.036138000 |
| C | -2.212536000 | -6.159966000 | 0.605392000  |
| C | -3.364294000 | -5.325245000 | 0.050020000  |
| H | -4.324933000 | -5.809361000 | 0.253951000  |
| H | -3.375943000 | -4.335033000 | 0.515757000  |
| H | -3.266660000 | -5.205053000 | -1.032530000 |
| C | -2.172336000 | -7.535411000 | -0.064902000 |
| H | -1.375557000 | -8.148509000 | 0.368778000  |
| H | -3.121095000 | -8.061726000 | 0.086136000  |
| H | -1.992478000 | -7.431425000 | -1.136856000 |
| C | -2.356869000 | -6.320392000 | 2.118384000  |
| H | -1.509551000 | -6.882645000 | 2.523143000  |
| H | -2.386660000 | -5.343099000 | 2.605387000  |
| H | -3.277215000 | -6.860483000 | 2.363653000  |
| C | 2.136886000  | -5.831582000 | -0.338938000 |
| C | 3.543903000  | -5.545279000 | -0.863553000 |
| H | 4.232528000  | -6.348951000 | -0.583478000 |
| H | 3.536780000  | -5.463568000 | -1.954340000 |
| H | 3.938514000  | -4.614226000 | -0.443716000 |
| C | 2.141644000  | -5.901567000 | 1.189497000  |

|   |              |              |              |
|---|--------------|--------------|--------------|
| H | 2.782159000  | -6.718755000 | 1.539318000  |
| H | 2.521382000  | -4.965870000 | 1.612548000  |
| H | 1.126370000  | -6.061063000 | 1.557921000  |
| C | 1.632667000  | -7.145544000 | -0.936742000 |
| H | 2.288306000  | -7.968635000 | -0.632993000 |
| H | 0.620973000  | -7.366731000 | -0.594039000 |
| H | 1.622546000  | -7.098370000 | -2.028898000 |
| C | -4.531203000 | -1.784970000 | 4.407989000  |
| C | -5.208990000 | -0.681841000 | 3.594542000  |
| H | -6.280017000 | -0.884545000 | 3.496270000  |
| H | -5.086975000 | 0.287770000  | 4.087531000  |
| H | -4.785984000 | -0.627762000 | 2.587457000  |
| C | -4.656683000 | -3.128249000 | 3.688129000  |
| H | -5.709173000 | -3.389719000 | 3.536182000  |
| H | -4.163049000 | -3.075887000 | 2.714650000  |
| H | -4.190999000 | -3.923571000 | 4.279025000  |
| C | -5.146823000 | -1.870600000 | 5.805737000  |
| H | -6.208580000 | -2.131081000 | 5.746700000  |
| H | -4.636574000 | -2.634624000 | 6.400296000  |
| H | -5.054730000 | -0.913389000 | 6.328122000  |
| C | -0.118158000 | -2.407468000 | 4.922060000  |
| C | 1.408982000  | -2.433737000 | 4.874894000  |
| H | 1.799655000  | -3.277325000 | 5.452418000  |
| H | 1.765429000  | -2.549362000 | 3.846286000  |
| H | 1.823083000  | -1.514431000 | 5.302387000  |
| C | -0.675512000 | -3.646465000 | 4.224408000  |
| H | -0.306241000 | -4.555716000 | 4.710515000  |
| H | -1.766430000 | -3.651993000 | 4.275234000  |
| H | -0.375976000 | -3.671028000 | 3.173141000  |
| C | -0.589144000 | -2.343403000 | 6.376988000  |
| H | -0.279227000 | -3.241902000 | 6.921713000  |
| H | -0.154130000 | -1.474014000 | 6.881653000  |
| H | -1.677472000 | -2.264942000 | 6.416903000  |
| C | -1.873248000 | 1.762354000  | 4.562947000  |
| C | -0.391452000 | 2.147653000  | 4.552038000  |
| H | 0.212735000  | 1.272724000  | 4.809436000  |
| H | -0.103723000 | 2.519736000  | 3.563342000  |
| H | -0.185227000 | 2.935336000  | 5.284617000  |
| C | -2.262464000 | 1.203196000  | 5.932323000  |
| H | -3.319211000 | 0.927942000  | 5.958603000  |
| H | -1.675463000 | 0.316488000  | 6.178468000  |
| H | -2.081732000 | 1.960574000  | 6.702712000  |
| C | -2.739610000 | 2.981188000  | 4.248564000  |
| H | -3.790782000 | 2.684225000  | 4.166109000  |
| H | -2.662092000 | 3.726251000  | 5.046811000  |
| H | -2.424334000 | 3.462436000  | 3.317704000  |
| C | 6.229398000  | -3.008442000 | 2.759432000  |
| C | 6.349662000  | -3.744395000 | 1.423256000  |
| H | 6.180994000  | -4.819422000 | 1.546519000  |
| H | 5.611443000  | -3.348613000 | 0.720446000  |
| H | 7.347438000  | -3.602565000 | 0.995546000  |
| C | 4.855035000  | -3.253827000 | 3.382790000  |
| H | 4.708156000  | -4.317466000 | 3.597151000  |
| H | 4.753669000  | -2.694449000 | 4.317431000  |
| H | 4.071403000  | -2.923530000 | 2.694130000  |
| C | 7.336853000  | -3.453252000 | 3.715762000  |
| H | 7.274542000  | -4.528915000 | 3.910624000  |
| H | 8.319526000  | -3.237180000 | 3.285419000  |
| H | 7.256581000  | -2.923192000 | 4.669397000  |
| C | 5.072839000  | 1.030410000  | 4.462438000  |
| C | 5.462951000  | 2.431627000  | 3.985015000  |
| H | 6.242235000  | 2.370298000  | 3.223721000  |
| H | 4.597191000  | 2.935766000  | 3.542958000  |
| H | 5.824437000  | 3.041116000  | 4.820222000  |



|   |              |              |              |
|---|--------------|--------------|--------------|
| C | 3.916276000  | 1.132629000  | 5.461646000  |
| H | 4.216342000  | 1.702130000  | 6.347304000  |
| H | 3.057416000  | 1.647267000  | 5.016427000  |
| H | 3.601190000  | 0.136526000  | 5.788399000  |
| C | 6.255409000  | 0.329489000  | 5.132892000  |
| H | 7.092824000  | 0.212215000  | 4.443491000  |
| H | 6.597027000  | 0.909329000  | 5.997035000  |
| H | 5.963226000  | -0.665319000 | 5.481635000  |
| C | 7.687780000  | 0.809958000  | 0.906782000  |
| C | 8.636659000  | 0.649378000  | 2.096612000  |
| H | 8.475468000  | -0.316498000 | 2.579325000  |
| H | 9.678793000  | 0.705999000  | 1.764010000  |
| H | 8.473758000  | 1.445115000  | 2.830131000  |
| C | 7.892851000  | 2.188891000  | 0.271826000  |
| H | 8.932599000  | 2.320103000  | -0.044583000 |
| H | 7.260880000  | 2.315472000  | -0.614633000 |
| H | 7.646950000  | 2.980484000  | 0.986320000  |
| C | 7.946083000  | -0.287818000 | -0.126890000 |
| H | 7.764995000  | -1.270696000 | 0.313314000  |
| H | 7.290439000  | -0.166823000 | -0.995149000 |
| H | 8.981567000  | -0.249902000 | -0.482047000 |
| C | 4.431440000  | -3.156552000 | -3.888453000 |
| H | 5.191710000  | -3.723374000 | -4.435602000 |
| H | 4.557218000  | -3.369430000 | -2.822579000 |
| H | 3.444264000  | -3.510841000 | -4.199640000 |
| C | 4.574537000  | -1.658724000 | -4.155962000 |
| C | 4.429901000  | -1.384063000 | -5.652540000 |
| H | 5.226225000  | -1.894466000 | -6.204363000 |
| H | 3.468828000  | -1.751041000 | -6.022647000 |
| H | 4.492768000  | -0.315665000 | -5.870313000 |
| C | 5.929728000  | -1.166500000 | -3.644674000 |
| H | 6.749620000  | -1.673782000 | -4.164220000 |
| H | 6.026601000  | -0.089453000 | -3.798421000 |
| H | 6.024088000  | -1.378465000 | -2.574863000 |
| C | 4.396072000  | 2.853172000  | -4.105137000 |
| C | 4.723517000  | 2.652260000  | -5.585703000 |
| H | 4.915693000  | 3.614546000  | -6.071901000 |
| H | 5.617344000  | 2.030028000  | -5.697894000 |
| H | 3.888043000  | 2.164376000  | -6.092181000 |
| C | 3.164098000  | 3.741977000  | -3.936910000 |
| H | 3.347440000  | 4.735589000  | -4.359387000 |
| H | 2.304406000  | 3.304314000  | -4.449052000 |
| H | 2.915272000  | 3.865486000  | -2.878322000 |
| C | 5.596010000  | 3.475612000  | -3.387237000 |
| H | 5.873417000  | 4.427150000  | -3.851386000 |
| H | 5.364929000  | 3.680201000  | -2.335399000 |
| H | 6.460831000  | 2.806236000  | -3.433851000 |
| C | 0.840693000  | 0.421792000  | -5.514998000 |
| C | 1.003850000  | 0.299896000  | -7.030641000 |
| H | 0.048253000  | 0.048478000  | -7.501741000 |
| H | 1.358246000  | 1.244890000  | -7.453713000 |
| H | 1.728020000  | -0.480654000 | -7.281115000 |
| C | -0.155264000 | 1.528957000  | -5.174217000 |
| H | -1.129908000 | 1.317096000  | -5.626102000 |
| H | -0.298670000 | 1.601746000  | -4.092797000 |
| H | 0.196620000  | 2.491016000  | -5.559668000 |
| C | 0.388700000  | -0.905462000 | -4.911055000 |
| H | -0.571546000 | -1.210989000 | -5.337803000 |
| H | 1.119673000  | -1.692480000 | -5.116010000 |
| H | 0.257921000  | -0.810194000 | -3.828531000 |
| C | 1.693330000  | 6.125963000  | 0.987893000  |
| C | 2.514241000  | 5.934090000  | 2.264809000  |
| H | 3.524929000  | 6.339059000  | 2.145710000  |
| H | 2.034971000  | 6.444031000  | 3.106237000  |

|   |              |             |              |
|---|--------------|-------------|--------------|
| H | 2.588353000  | 4.869349000 | 2.505210000  |
| C | 2.342941000  | 5.370197000 | -0.172147000 |
| H | 3.364364000  | 5.733289000 | -0.336359000 |
| H | 2.372055000  | 4.298539000 | 0.048599000  |
| H | 1.772916000  | 5.528079000 | -1.092082000 |
| C | 1.557599000  | 7.613290000 | 0.652808000  |
| H | 2.538391000  | 8.061272000 | 0.458749000  |
| H | 0.932012000  | 7.739970000 | -0.234535000 |
| H | 1.095254000  | 8.151717000 | 1.486377000  |
| C | -1.430003000 | 5.761665000 | -2.328354000 |
| C | -0.478625000 | 4.990627000 | -3.244845000 |
| H | 0.479979000  | 5.512240000 | -3.322847000 |
| H | -0.301594000 | 3.987045000 | -2.848631000 |
| H | -0.898584000 | 4.888674000 | -4.251038000 |
| C | -1.653116000 | 7.173741000 | -2.875495000 |
| H | -0.702357000 | 7.712918000 | -2.928261000 |
| H | -2.087677000 | 7.138607000 | -3.879981000 |
| H | -2.328212000 | 7.737270000 | -2.225333000 |
| C | -2.762213000 | 5.019103000 | -2.210124000 |
| H | -3.429561000 | 5.530370000 | -1.510671000 |
| H | -3.257922000 | 4.964855000 | -3.184779000 |
| H | -2.593790000 | 3.997060000 | -1.859754000 |
| C | -2.739795000 | 6.336527000 | 1.862701000  |
| C | -1.956451000 | 6.598733000 | 3.151847000  |
| H | -0.903097000 | 6.773366000 | 2.927890000  |
| H | -2.363220000 | 7.474199000 | 3.669749000  |
| H | -2.024099000 | 5.741295000 | 3.825707000  |
| C | -2.663692000 | 7.560968000 | 0.948389000  |
| H | -1.631860000 | 7.787650000 | 0.672115000  |
| H | -3.235267000 | 7.397254000 | 0.030704000  |
| H | -3.083630000 | 8.433383000 | 1.460586000  |
| C | -4.203768000 | 6.037514000 | 2.190218000  |
| H | -4.662650000 | 6.881362000 | 2.715735000  |
| H | -4.772253000 | 5.854862000 | 1.273340000  |
| H | -4.284148000 | 5.154804000 | 2.832342000  |

### Rb<sub>2</sub>-N<sub>2</sub>

|    |              |              |              |
|----|--------------|--------------|--------------|
| U  | 12.608767000 | 2.069006000  | 31.269746000 |
| U  | 12.015814000 | -0.799697000 | 29.641841000 |
| Rb | 13.202815000 | 5.184848000  | 33.257757000 |
| Rb | 11.321678000 | -3.887405000 | 27.640780000 |
| Si | 12.175106000 | 2.177512000  | 35.068644000 |
| Si | 15.980179000 | 3.874405000  | 31.381353000 |
| Si | 10.669976000 | 5.320213000  | 30.638999000 |
| Si | 11.672343000 | -0.732561000 | 25.829672000 |
| Si | 8.888237000  | -2.945649000 | 30.196890000 |
| Si | 14.331852000 | -3.843497000 | 29.612123000 |
| O  | 11.052816000 | 0.913062000  | 30.426016000 |
| O  | 12.162709000 | 2.293450000  | 33.433964000 |
| O  | 10.735247000 | 1.669744000  | 35.739259000 |
| O  | 13.347808000 | 1.195724000  | 35.723321000 |
| O  | 12.582794000 | 3.731898000  | 35.606437000 |
| O  | 14.520099000 | 3.164553000  | 31.600324000 |
| O  | 17.306312000 | 2.949984000  | 31.777976000 |
| O  | 15.882347000 | 5.261470000  | 32.356794000 |
| O  | 16.276949000 | 4.455073000  | 29.850469000 |
| O  | 11.706548000 | 4.065801000  | 30.827162000 |
| O  | 9.096322000  | 5.042603000  | 31.104301000 |
| O  | 10.585633000 | 5.932947000  | 29.089241000 |
| O  | 11.218380000 | 6.497020000  | 31.730349000 |
| O  | 11.582534000 | -0.826283000 | 27.463252000 |
| O  | 13.161618000 | -0.339026000 | 25.199894000 |
| O  | 10.594298000 | 0.334279000  | 25.136572000 |
| O  | 11.397999000 | -2.315304000 | 25.287836000 |

|   |              |              |              |
|---|--------------|--------------|--------------|
| O | 10.357983000 | -2.234244000 | 30.063044000 |
| O | 7.590029000  | -2.044970000 | 29.673280000 |
| O | 8.942477000  | -4.250672000 | 29.114520000 |
| O | 8.494429000  | -3.459109000 | 31.734081000 |
| O | 13.310669000 | -2.588483000 | 29.355240000 |
| O | 13.687640000 | -5.072508000 | 28.632397000 |
| O | 14.315422000 | -4.477776000 | 31.150069000 |
| O | 15.932940000 | -3.563200000 | 29.250680000 |
| N | 13.445114000 | 0.087157000  | 31.123283000 |
| N | 13.596718000 | 0.652088000  | 29.842025000 |
| C | 9.376194000  | 2.038557000  | 35.454870000 |
| C | 9.269564000  | 3.508447000  | 35.047895000 |
| H | 9.663452000  | 4.159095000  | 35.834031000 |
| H | 8.223461000  | 3.778027000  | 34.871707000 |
| H | 9.821952000  | 3.696147000  | 34.122767000 |
| C | 8.599550000  | 1.786693000  | 36.748771000 |
| H | 8.709017000  | 0.743309000  | 37.059349000 |
| H | 7.534094000  | 1.996137000  | 36.609067000 |
| H | 8.973655000  | 2.424106000  | 37.555482000 |
| C | 8.855740000  | 1.135038000  | 34.339948000 |
| H | 9.424597000  | 1.289569000  | 33.419699000 |
| H | 7.799859000  | 1.339191000  | 34.135956000 |
| H | 8.950146000  | 0.084895000  | 34.631897000 |
| C | 13.365616000 | -0.226512000 | 35.943219000 |
| C | 12.693174000 | -0.524818000 | 37.285137000 |
| H | 13.219051000 | -0.013459000 | 38.098140000 |
| H | 12.709359000 | -1.599795000 | 37.494405000 |
| H | 11.654580000 | -0.185403000 | 37.271022000 |
| C | 14.842281000 | -0.617683000 | 35.989103000 |
| H | 15.324668000 | -0.391194000 | 35.034819000 |
| H | 14.951630000 | -1.688267000 | 36.190586000 |
| H | 15.358868000 | -0.064109000 | 36.779594000 |
| C | 12.654519000 | -0.957528000 | 34.807888000 |
| H | 11.595954000 | -0.684454000 | 34.780217000 |
| H | 12.721184000 | -2.039480000 | 34.956258000 |
| H | 13.108197000 | -0.714657000 | 33.842760000 |
| C | 12.998699000 | 4.151717000  | 36.922960000 |
| C | 12.720008000 | 5.656093000  | 36.992253000 |
| H | 13.311993000 | 6.203916000  | 36.249847000 |
| H | 12.987331000 | 6.052493000  | 37.976770000 |
| H | 11.659770000 | 5.861481000  | 36.814954000 |
| C | 14.496798000 | 3.882335000  | 37.078480000 |
| H | 14.695261000 | 2.813397000  | 36.981709000 |
| H | 14.854124000 | 4.227168000  | 38.054857000 |
| H | 15.064869000 | 4.407785000  | 36.303686000 |
| C | 12.210112000 | 3.436224000  | 38.019821000 |
| H | 11.139199000 | 3.631682000  | 37.921959000 |
| H | 12.536114000 | 3.788748000  | 39.004067000 |
| H | 12.368146000 | 2.357126000  | 37.971100000 |
| C | 17.548723000 | 2.025397000  | 32.851945000 |
| C | 17.050305000 | 0.644532000  | 32.431025000 |
| H | 15.973939000 | 0.648922000  | 32.238431000 |
| H | 17.263641000 | -0.093054000 | 33.211912000 |
| H | 17.558229000 | 0.324305000  | 31.516483000 |
| C | 16.860021000 | 2.482213000  | 34.137664000 |
| H | 17.180644000 | 3.492269000  | 34.410069000 |
| H | 17.110369000 | 1.808949000  | 34.963471000 |
| H | 15.772843000 | 2.474379000  | 34.021525000 |
| C | 19.067262000 | 2.007242000  | 33.039311000 |
| H | 19.559593000 | 1.716171000  | 32.106493000 |
| H | 19.353039000 | 1.292756000  | 33.818056000 |
| H | 19.435199000 | 2.997199000  | 33.325623000 |
| C | 16.738047000 | 6.418860000  | 32.394896000 |
| C | 18.213581000 | 6.032717000  | 32.292099000 |

|   |              |             |              |
|---|--------------|-------------|--------------|
| H | 18.491941000 | 5.345929000 | 33.095644000 |
| H | 18.841702000 | 6.926599000 | 32.368596000 |
| H | 18.424650000 | 5.545715000 | 31.338381000 |
| C | 16.479033000 | 7.086376000 | 33.749108000 |
| H | 15.433951000 | 7.405943000 | 33.836027000 |
| H | 17.103710000 | 7.977314000 | 33.867077000 |
| H | 16.704564000 | 6.397269000 | 34.569033000 |
| C | 16.348075000 | 7.365846000 | 31.257443000 |
| H | 16.479485000 | 6.867975000 | 30.294986000 |
| H | 16.960789000 | 8.273560000 | 31.279633000 |
| H | 15.297531000 | 7.661889000 | 31.348615000 |
| C | 16.931985000 | 3.866625000 | 28.711166000 |
| C | 16.348224000 | 4.584706000 | 27.494205000 |
| H | 15.270642000 | 4.410360000 | 27.433656000 |
| H | 16.813712000 | 4.225235000 | 26.570678000 |
| H | 16.518149000 | 5.663506000 | 27.568680000 |
| C | 16.667022000 | 2.365358000 | 28.632220000 |
| H | 17.132793000 | 1.850746000 | 29.475595000 |
| H | 17.086901000 | 1.957351000 | 27.706910000 |
| H | 15.597037000 | 2.142466000 | 28.653580000 |
| C | 18.434591000 | 4.136967000 | 28.817078000 |
| H | 18.630790000 | 5.213192000 | 28.865665000 |
| H | 18.961118000 | 3.734899000 | 27.944718000 |
| H | 18.839119000 | 3.662754000 | 29.715149000 |
| C | 7.982222000  | 4.484716000 | 30.384693000 |
| C | 7.050450000  | 3.910073000 | 31.451243000 |
| H | 7.557991000  | 3.121240000 | 32.012640000 |
| H | 6.150282000  | 3.488600000 | 30.992086000 |
| H | 6.744871000  | 4.692598000 | 32.153080000 |
| C | 8.447645000  | 3.390658000 | 29.429069000 |
| H | 9.091929000  | 3.814590000 | 28.654047000 |
| H | 7.586855000  | 2.926332000 | 28.938320000 |
| H | 9.006659000  | 2.612994000 | 29.956791000 |
| C | 7.284514000  | 5.609387000 | 29.616609000 |
| H | 6.937983000  | 6.387216000 | 30.305082000 |
| H | 6.414535000  | 5.224405000 | 29.073688000 |
| H | 7.974935000  | 6.057685000 | 28.897555000 |
| C | 11.613987000 | 6.214641000 | 28.126502000 |
| C | 11.929992000 | 4.929665000 | 27.364567000 |
| H | 12.322806000 | 4.171144000 | 28.046029000 |
| H | 12.672671000 | 5.113245000 | 26.581569000 |
| H | 11.025218000 | 4.535147000 | 26.892926000 |
| C | 11.017594000 | 7.260243000 | 27.182449000 |
| H | 10.096863000 | 6.880430000 | 26.729584000 |
| H | 11.721692000 | 7.506641000 | 26.381213000 |
| H | 10.776716000 | 8.178495000 | 27.726278000 |
| C | 12.874185000 | 6.760094000 | 28.798970000 |
| H | 12.645185000 | 7.655956000 | 29.382947000 |
| H | 13.621576000 | 7.024641000 | 28.044126000 |
| H | 13.320337000 | 6.012142000 | 29.460560000 |
| C | 10.554403000 | 7.695898000 | 32.180215000 |
| C | 11.662511000 | 8.617104000 | 32.699375000 |
| H | 12.182391000 | 8.167937000 | 33.553625000 |
| H | 11.246684000 | 9.571606000 | 33.036929000 |
| H | 12.395537000 | 8.819633000 | 31.912493000 |
| C | 9.805524000  | 8.390082000 | 31.042545000 |
| H | 10.489104000 | 8.663580000 | 30.234776000 |
| H | 9.326788000  | 9.302731000 | 31.412853000 |
| H | 9.032312000  | 7.738537000 | 30.631438000 |
| C | 9.591579000  | 7.333720000 | 33.313131000 |
| H | 8.830507000  | 6.641295000 | 32.948948000 |
| H | 9.102875000  | 8.230356000 | 33.709283000 |
| H | 10.130045000 | 6.849979000 | 34.135258000 |
| C | 13.782263000 | 0.945879000 | 25.009160000 |

|   |              |              |              |
|---|--------------|--------------|--------------|
| C | 15.284961000 | 0.673138000  | 24.951313000 |
| H | 15.628691000 | 0.240010000  | 25.894184000 |
| H | 15.839055000 | 1.599958000  | 24.771148000 |
| H | 15.514619000 | -0.027534000 | 24.142295000 |
| C | 13.452569000 | 1.876005000  | 26.172596000 |
| H | 12.377593000 | 2.073905000  | 26.212480000 |
| H | 13.968908000 | 2.832802000  | 26.051134000 |
| H | 13.765852000 | 1.434241000  | 27.122547000 |
| C | 13.296489000 | 1.538359000  | 23.684547000 |
| H | 13.552165000 | 0.874964000  | 22.851781000 |
| H | 13.768328000 | 2.509664000  | 23.500831000 |
| H | 12.212329000 | 1.672338000  | 23.705589000 |
| C | 9.193909000  | 0.556399000  | 25.367061000 |
| C | 9.048032000  | 1.612409000  | 26.459645000 |
| H | 9.475435000  | 1.258403000  | 27.401134000 |
| H | 7.993278000  | 1.854379000  | 26.625094000 |
| H | 9.566531000  | 2.530613000  | 26.167929000 |
| C | 8.633694000  | 1.083350000  | 24.044342000 |
| H | 9.172265000  | 1.984972000  | 23.737716000 |
| H | 7.572137000  | 1.331503000  | 24.144782000 |
| H | 8.739825000  | 0.336195000  | 23.252274000 |
| C | 8.480507000  | -0.734416000 | 25.770413000 |
| H | 8.616990000  | -1.507298000 | 25.008729000 |
| H | 7.407406000  | -0.553217000 | 25.887758000 |
| H | 8.860661000  | -1.109282000 | 26.725042000 |
| C | 11.632796000 | -2.867310000 | 23.974789000 |
| C | 13.108567000 | -3.253784000 | 23.855949000 |
| H | 13.737270000 | -2.369084000 | 23.972904000 |
| H | 13.311793000 | -3.713161000 | 22.882577000 |
| H | 13.381818000 | -3.973695000 | 24.634760000 |
| C | 10.748538000 | -4.114006000 | 23.879687000 |
| H | 11.033717000 | -4.859637000 | 24.630908000 |
| H | 10.851105000 | -4.586473000 | 22.897773000 |
| H | 9.695911000  | -3.853456000 | 24.027363000 |
| C | 11.245786000 | -1.882295000 | 22.871584000 |
| H | 10.189843000 | -1.609921000 | 22.945731000 |
| H | 11.416897000 | -2.335051000 | 21.889298000 |
| H | 11.840572000 | -0.969360000 | 22.938964000 |
| C | 6.783792000  | -1.065079000 | 30.352062000 |
| C | 7.625485000  | -0.247693000 | 31.327172000 |
| H | 8.004085000  | -0.885025000 | 32.130856000 |
| H | 7.016744000  | 0.541342000  | 31.779409000 |
| H | 8.477124000  | 0.218202000  | 30.823591000 |
| C | 6.214751000  | -0.169314000 | 29.252222000 |
| H | 7.024783000  | 0.335214000  | 28.719010000 |
| H | 5.549922000  | 0.589787000  | 29.677090000 |
| H | 5.643385000  | -0.763876000 | 28.532430000 |
| C | 5.653838000  | -1.787276000 | 31.089403000 |
| H | 5.040691000  | -2.359633000 | 30.385416000 |
| H | 5.003565000  | -1.067919000 | 31.598835000 |
| H | 6.066589000  | -2.472644000 | 31.834130000 |
| C | 7.859440000  | -5.070643000 | 28.629883000 |
| C | 7.183453000  | -4.354977000 | 27.458403000 |
| H | 6.768919000  | -3.402410000 | 27.793118000 |
| H | 6.380034000  | -4.970028000 | 27.039150000 |
| H | 7.907383000  | -4.153327000 | 26.661379000 |
| C | 6.842071000  | -5.375357000 | 29.729447000 |
| H | 7.315016000  | -5.898043000 | 30.564680000 |
| H | 6.043584000  | -6.011092000 | 29.332585000 |
| H | 6.392878000  | -4.456316000 | 30.110356000 |
| C | 8.501598000  | -6.377527000 | 28.154730000 |
| H | 9.199762000  | -6.199462000 | 27.328545000 |
| H | 7.738419000  | -7.072907000 | 27.791373000 |
| H | 9.045484000  | -6.860027000 | 28.972510000 |

|   |              |              |              |
|---|--------------|--------------|--------------|
| C | 9.269577000  | -4.138278000 | 32.735163000 |
| C | 10.033677000 | -3.094041000 | 33.545730000 |
| H | 10.733581000 | -2.552037000 | 32.905335000 |
| H | 10.596907000 | -3.565865000 | 34.357214000 |
| H | 9.338470000  | -2.372998000 | 33.985765000 |
| C | 8.253781000  | -4.859897000 | 33.623333000 |
| H | 7.538723000  | -4.144741000 | 34.040882000 |
| H | 8.755404000  | -5.370757000 | 34.451564000 |
| H | 7.695212000  | -5.603484000 | 33.047002000 |
| C | 10.236317000 | -5.142842000 | 32.107720000 |
| H | 9.695306000  | -5.871021000 | 31.496610000 |
| H | 10.777799000 | -5.685775000 | 32.889067000 |
| H | 10.976041000 | -4.636762000 | 31.480811000 |
| C | 13.984561000 | -6.481558000 | 28.612911000 |
| C | 13.479323000 | -6.995745000 | 27.261158000 |
| H | 12.395038000 | -6.862005000 | 27.168933000 |
| H | 13.685894000 | -8.064874000 | 27.151043000 |
| H | 13.969891000 | -6.464664000 | 26.439301000 |
| C | 13.231055000 | -7.169642000 | 29.753519000 |
| H | 13.563968000 | -6.774118000 | 30.714842000 |
| H | 13.398737000 | -8.251919000 | 29.731601000 |
| H | 12.154605000 | -6.989002000 | 29.664731000 |
| C | 15.486592000 | -6.741976000 | 28.726955000 |
| H | 16.028739000 | -6.261135000 | 27.908400000 |
| H | 15.684863000 | -7.818276000 | 28.685981000 |
| H | 15.879329000 | -6.356536000 | 29.669636000 |
| C | 15.127298000 | -4.210129000 | 32.308333000 |
| C | 14.272158000 | -4.624775000 | 33.505989000 |
| H | 13.360426000 | -4.022846000 | 33.545766000 |
| H | 14.823328000 | -4.487901000 | 34.442096000 |
| H | 13.985964000 | -5.678230000 | 33.425147000 |
| C | 16.388927000 | -5.073032000 | 32.232839000 |
| H | 16.127062000 | -6.135083000 | 32.181319000 |
| H | 17.014242000 | -4.919890000 | 33.118995000 |
| H | 16.972570000 | -4.809784000 | 31.346839000 |
| C | 15.496066000 | -2.731669000 | 32.394219000 |
| H | 16.145078000 | -2.450368000 | 31.561808000 |
| H | 16.030313000 | -2.530551000 | 33.328518000 |
| H | 14.608987000 | -2.093830000 | 32.358292000 |
| C | 16.557419000 | -2.832314000 | 28.181084000 |
| C | 17.945506000 | -3.454675000 | 28.016298000 |
| H | 18.496850000 | -3.403604000 | 28.959944000 |
| H | 18.519836000 | -2.922394000 | 27.251152000 |
| H | 17.867962000 | -4.505661000 | 27.721390000 |
| C | 16.677109000 | -1.367807000 | 28.597174000 |
| H | 15.694354000 | -0.923707000 | 28.777955000 |
| H | 17.185856000 | -0.788244000 | 27.819561000 |
| H | 17.263017000 | -1.284856000 | 29.517499000 |
| C | 15.759776000 | -2.964982000 | 26.883984000 |
| H | 15.618100000 | -4.018704000 | 26.625785000 |
| H | 16.289515000 | -2.478037000 | 26.059282000 |
| H | 14.780462000 | -2.487862000 | 26.976866000 |

#### Rb<sub>4</sub>-(N)<sub>2</sub>

|    |              |             |              |
|----|--------------|-------------|--------------|
| U  | 9.364198000  | 5.714048000 | 5.549837000  |
| U  | 10.309783000 | 2.591506000 | 6.147826000  |
| Rb | 10.485182000 | 5.152367000 | 9.291328000  |
| Rb | 6.586164000  | 4.701472000 | 8.043859000  |
| Rb | 8.476068000  | 8.532393000 | 8.259247000  |
| Rb | 8.391307000  | 2.883157000 | 2.942331000  |
| Si | 11.586815000 | 0.837235000 | 2.915152000  |
| Si | 12.229169000 | 1.741201000 | 9.337248000  |
| Si | 7.025038000  | 0.820032000 | 6.231075000  |
| Si | 6.644364000  | 7.075204000 | 10.799144000 |

|    |              |              |              |
|----|--------------|--------------|--------------|
| Si | 11.859902000 | 8.171916000  | 7.311939000  |
| Si | 7.350740000  | 6.402965000  | 2.349795000  |
| O  | 11.022348000 | 1.548564000  | 4.264159000  |
| O  | 10.380836000 | 1.087172000  | 1.743837000  |
| O  | 13.071719000 | 1.388558000  | 2.372606000  |
| O  | 11.775866000 | -0.821740000 | 2.986756000  |
| O  | 7.964610000  | 6.687465000  | 6.266428000  |
| O  | 11.666618000 | 2.420745000  | 7.970978000  |
| O  | 13.879359000 | 1.441962000  | 9.338020000  |
| O  | 11.545991000 | 0.282849000  | 9.790085000  |
| O  | 11.808561000 | 2.821827000  | 10.577481000 |
| O  | 8.609806000  | 1.128621000  | 6.121577000  |
| O  | 6.658552000  | -0.814993000 | 6.152591000  |
| O  | 6.242399000  | 1.361806000  | 7.627679000  |
| O  | 6.275944000  | 1.665855000  | 4.968649000  |
| O  | 7.925080000  | 6.438140000  | 10.091792000 |
| O  | 6.399372000  | 6.825795000  | 12.451967000 |
| O  | 5.281471000  | 6.499245000  | 9.946598000  |
| O  | 6.545901000  | 8.769876000  | 10.588942000 |
| O  | 10.764073000 | 7.080362000  | 6.852421000  |
| O  | 12.255188000 | 7.722573000  | 8.896819000  |
| O  | 11.170355000 | 9.714560000  | 7.472123000  |
| O  | 13.196315000 | 8.404395000  | 6.344065000  |
| O  | 8.294891000  | 5.723211000  | 3.477059000  |
| O  | 5.977901000  | 7.201038000  | 2.870070000  |
| O  | 8.134759000  | 7.523701000  | 1.372075000  |
| O  | 6.762011000  | 5.097938000  | 1.436084000  |
| N  | 9.059510000  | 4.079798000  | 6.832848000  |
| N  | 10.650280000 | 4.564542000  | 4.921121000  |
| C  | 10.232699000 | 0.466221000  | 0.452149000  |
| C  | 9.300680000  | 1.381166000  | -0.346341000 |
| H  | 9.148177000  | 0.993274000  | -1.358545000 |
| H  | 8.315715000  | 1.447660000  | 0.128782000  |
| H  | 9.723048000  | 2.388231000  | -0.425473000 |
| C  | 11.571135000 | 0.344306000  | -0.277283000 |
| H  | 11.419682000 | -0.108432000 | -1.263012000 |
| H  | 12.028779000 | 1.327177000  | -0.417350000 |
| H  | 12.267508000 | -0.280328000 | 0.284773000  |
| C  | 9.589076000  | -0.910981000 | 0.626482000  |
| H  | 9.428829000  | -1.389790000 | -0.345788000 |
| H  | 10.229273000 | -1.548002000 | 1.239570000  |
| H  | 8.619679000  | -0.816720000 | 1.125870000  |
| C  | 14.302615000 | 3.068880000  | 3.578212000  |
| H  | 14.799741000 | 4.041878000  | 3.503363000  |
| H  | 13.557401000 | 3.125108000  | 4.375078000  |
| H  | 15.053946000 | 2.319340000  | 3.845507000  |
| C  | 13.630254000 | 2.703828000  | 2.254727000  |
| C  | 12.559638000 | 3.735695000  | 1.902051000  |
| H  | 13.021650000 | 4.710602000  | 1.713490000  |
| H  | 12.021919000 | 3.434274000  | 0.998160000  |
| H  | 11.850723000 | 3.860352000  | 2.727783000  |
| C  | 14.674650000 | 2.608197000  | 1.139634000  |
| H  | 15.198480000 | 3.561430000  | 1.013424000  |
| H  | 15.413600000 | 1.836488000  | 1.376720000  |
| H  | 14.201274000 | 2.345981000  | 0.188755000  |
| C  | 12.885980000 | -1.631392000 | 3.402496000  |
| C  | 13.680168000 | -0.954311000 | 4.519056000  |
| H  | 14.467037000 | -1.620896000 | 4.888158000  |
| H  | 14.146283000 | -0.036309000 | 4.153866000  |
| H  | 13.021700000 | -0.702501000 | 5.353564000  |
| C  | 13.784690000 | -1.891865000 | 2.191385000  |
| H  | 14.627506000 | -2.536635000 | 2.463607000  |
| H  | 13.219283000 | -2.388742000 | 1.396251000  |
| H  | 14.176488000 | -0.946692000 | 1.807060000  |

|   |              |              |              |
|---|--------------|--------------|--------------|
| C | 12.275500000 | -2.941049000 | 3.904534000  |
| H | 13.057001000 | -3.645645000 | 4.207766000  |
| H | 11.624107000 | -2.751327000 | 4.762191000  |
| H | 11.677301000 | -3.407932000 | 3.115788000  |
| C | 14.980097000 | 2.220469000  | 8.854496000  |
| C | 14.808406000 | 3.693413000  | 9.228482000  |
| H | 15.679543000 | 4.274702000  | 8.908604000  |
| H | 13.923869000 | 4.110459000  | 8.738723000  |
| H | 14.694901000 | 3.804750000  | 10.310624000 |
| C | 15.080028000 | 2.059750000  | 7.337404000  |
| H | 15.933036000 | 2.619934000  | 6.939661000  |
| H | 15.210998000 | 1.005524000  | 7.075254000  |
| H | 14.168102000 | 2.423245000  | 6.858472000  |
| C | 16.224068000 | 1.644555000  | 9.534341000  |
| H | 17.127533000 | 2.165144000  | 9.200453000  |
| H | 16.148078000 | 1.742319000  | 10.621498000 |
| H | 16.328713000 | 0.582456000  | 9.293432000  |
| C | 11.909288000 | -1.071831000 | 9.470718000  |
| C | 12.289758000 | -1.192202000 | 7.997005000  |
| H | 12.515029000 | -2.232171000 | 7.739089000  |
| H | 11.467367000 | -0.853281000 | 7.359745000  |
| H | 13.175096000 | -0.587991000 | 7.782399000  |
| C | 13.072304000 | -1.515659000 | 10.361673000 |
| H | 12.784240000 | -1.470983000 | 11.417058000 |
| H | 13.355396000 | -2.549097000 | 10.134002000 |
| H | 13.938760000 | -0.869811000 | 10.204522000 |
| C | 10.671118000 | -1.916058000 | 9.770892000  |
| H | 10.374164000 | -1.797180000 | 10.817585000 |
| H | 9.835560000  | -1.607550000 | 9.138641000  |
| H | 10.873335000 | -2.976605000 | 9.588700000  |
| C | 11.798949000 | 2.590793000  | 12.000666000 |
| C | 11.847646000 | 3.973715000  | 12.653679000 |
| H | 11.850155000 | 3.885296000  | 13.744874000 |
| H | 12.752321000 | 4.509880000  | 12.351541000 |
| H | 10.972840000 | 4.571505000  | 12.376752000 |
| C | 10.499369000 | 1.875155000  | 12.376663000 |
| H | 10.441671000 | 1.715800000  | 13.459043000 |
| H | 9.634295000  | 2.474210000  | 12.073919000 |
| H | 10.444317000 | 0.910105000  | 11.869465000 |
| C | 13.012684000 | 1.777728000  | 12.452458000 |
| H | 12.987491000 | 1.639487000  | 13.538622000 |
| H | 13.020521000 | 0.794476000  | 11.980341000 |
| H | 13.943654000 | 2.289417000  | 12.193398000 |
| C | 7.290495000  | -1.848455000 | 5.377768000  |
| C | 7.622876000  | -1.353405000 | 3.969850000  |
| H | 8.049714000  | -2.164368000 | 3.371893000  |
| H | 6.719444000  | -0.993574000 | 3.467141000  |
| H | 8.358490000  | -0.545153000 | 4.010826000  |
| C | 8.562772000  | -2.299776000 | 6.095094000  |
| H | 9.060716000  | -3.099983000 | 5.537917000  |
| H | 9.251636000  | -1.457083000 | 6.190784000  |
| H | 8.323614000  | -2.678100000 | 7.094062000  |
| C | 6.278604000  | -2.993777000 | 5.313955000  |
| H | 6.693743000  | -3.847781000 | 4.768951000  |
| H | 6.013793000  | -3.324734000 | 6.322844000  |
| H | 5.362888000  | -2.673032000 | 4.808006000  |
| C | 6.109498000  | 0.673909000  | 8.889393000  |
| C | 5.784210000  | 1.748979000  | 9.926526000  |
| H | 5.576663000  | 1.295509000  | 10.900552000 |
| H | 6.626965000  | 2.434759000  | 10.057856000 |
| H | 4.896619000  | 2.315878000  | 9.624620000  |
| C | 7.409613000  | -0.032663000 | 9.266907000  |
| H | 7.322292000  | -0.493245000 | 10.256528000 |
| H | 7.635665000  | -0.819063000 | 8.543363000  |



|   |              |              |              |
|---|--------------|--------------|--------------|
| H | 8.246733000  | 0.670917000  | 9.287048000  |
| C | 4.950831000  | -0.322730000 | 8.805909000  |
| H | 4.821316000  | -0.841803000 | 9.761703000  |
| H | 4.015229000  | 0.197240000  | 8.573545000  |
| H | 5.145612000  | -1.062103000 | 8.026718000  |
| C | 4.871038000  | 1.823121000  | 4.697711000  |
| C | 4.349991000  | 3.028108000  | 5.486302000  |
| H | 4.423866000  | 2.821657000  | 6.557606000  |
| H | 4.935802000  | 3.920102000  | 5.239982000  |
| H | 3.301900000  | 3.232322000  | 5.242459000  |
| C | 4.063656000  | 0.572558000  | 5.047419000  |
| H | 4.422449000  | -0.293894000 | 4.486806000  |
| H | 4.135107000  | 0.339511000  | 6.111391000  |
| H | 3.008792000  | 0.732215000  | 4.799477000  |
| C | 4.765781000  | 2.094783000  | 3.197477000  |
| H | 5.181217000  | 1.254969000  | 2.629936000  |
| H | 3.721099000  | 2.221769000  | 2.896317000  |
| H | 5.302385000  | 3.010009000  | 2.930351000  |
| C | 6.947723000  | 5.801141000  | 13.292536000 |
| C | 8.402216000  | 6.146379000  | 13.620477000 |
| H | 8.855799000  | 5.377930000  | 14.255290000 |
| H | 8.976060000  | 6.224048000  | 12.692470000 |
| H | 8.460599000  | 7.102505000  | 14.150232000 |
| C | 6.874936000  | 4.433830000  | 12.609325000 |
| H | 7.287652000  | 3.653508000  | 13.257221000 |
| H | 5.839210000  | 4.170263000  | 12.376888000 |
| H | 7.448012000  | 4.460190000  | 11.677821000 |
| C | 6.101111000  | 5.805793000  | 14.566395000 |
| H | 6.471673000  | 5.066124000  | 15.283708000 |
| H | 6.130868000  | 6.791663000  | 15.040346000 |
| H | 5.057941000  | 5.569614000  | 14.335376000 |
| C | 3.869272000  | 6.624051000  | 10.160607000 |
| C | 3.498773000  | 7.938350000  | 10.845181000 |
| H | 3.924745000  | 7.978899000  | 11.850304000 |
| H | 3.875163000  | 8.790424000  | 10.274611000 |
| H | 2.410172000  | 8.023753000  | 10.930922000 |
| C | 3.222822000  | 6.566018000  | 8.772763000  |
| H | 2.133375000  | 6.647407000  | 8.843558000  |
| H | 3.589778000  | 7.384788000  | 8.146130000  |
| H | 3.451697000  | 5.618053000  | 8.272661000  |
| C | 3.393641000  | 5.445416000  | 11.014677000 |
| H | 3.857389000  | 5.488704000  | 12.003300000 |
| H | 2.305857000  | 5.466684000  | 11.141949000 |
| H | 3.663106000  | 4.493050000  | 10.546161000 |
| C | 6.868614000  | 9.868531000  | 11.452315000 |
| C | 5.876587000  | 9.965162000  | 12.614742000 |
| H | 5.882639000  | 9.038657000  | 13.191929000 |
| H | 6.144426000  | 10.797284000 | 13.274908000 |
| H | 4.863411000  | 10.140402000 | 12.243285000 |
| C | 6.755630000  | 11.126912000 | 10.584936000 |
| H | 6.929787000  | 12.028374000 | 11.181093000 |
| H | 7.492686000  | 11.120404000 | 9.773533000  |
| H | 5.757776000  | 11.193048000 | 10.141032000 |
| C | 8.293530000  | 9.731841000  | 11.993461000 |
| H | 8.388203000  | 8.824410000  | 12.593560000 |
| H | 9.022341000  | 9.683488000  | 11.178164000 |
| H | 8.555869000  | 10.589523000 | 12.622066000 |
| C | 13.428434000 | 7.340475000  | 10.919350000 |
| H | 14.022807000 | 7.778153000  | 11.727838000 |
| H | 12.537317000 | 6.888934000  | 11.366946000 |
| H | 14.018834000 | 6.550569000  | 10.445560000 |
| C | 13.035061000 | 8.407076000  | 9.896315000  |
| C | 14.294141000 | 9.036263000  | 9.300206000  |
| H | 14.876057000 | 9.526023000  | 10.088001000 |

|   |              |              |              |
|---|--------------|--------------|--------------|
| H | 14.924135000 | 8.274143000  | 8.834235000  |
| H | 14.046333000 | 9.782304000  | 8.542255000  |
| C | 12.167094000 | 9.474285000  | 10.566493000 |
| H | 12.723428000 | 9.988194000  | 11.357521000 |
| H | 11.835457000 | 10.210773000 | 9.831306000  |
| H | 11.285515000 | 9.011043000  | 11.020975000 |
| C | 11.186252000 | 10.842171000 | 6.575967000  |
| C | 12.554126000 | 11.525165000 | 6.632915000  |
| H | 12.574136000 | 12.403803000 | 5.979485000  |
| H | 12.772634000 | 11.855758000 | 7.653573000  |
| H | 13.333480000 | 10.830855000 | 6.313112000  |
| C | 10.856212000 | 10.403207000 | 5.149182000  |
| H | 10.811672000 | 11.268437000 | 4.479439000  |
| H | 11.619845000 | 9.717763000  | 4.775167000  |
| H | 9.886340000  | 9.897011000  | 5.113381000  |
| C | 10.111140000 | 11.802374000 | 7.092919000  |
| H | 10.109917000 | 12.729584000 | 6.511640000  |
| H | 9.111347000  | 11.361609000 | 7.006766000  |
| H | 10.294617000 | 12.055396000 | 8.141931000  |
| C | 14.033024000 | 7.465188000  | 5.639327000  |
| C | 15.415324000 | 8.116241000  | 5.567101000  |
| H | 16.111588000 | 7.481225000  | 5.010046000  |
| H | 15.354934000 | 9.085602000  | 5.062690000  |
| H | 15.821770000 | 8.276775000  | 6.569686000  |
| C | 13.465958000 | 7.269048000  | 4.234314000  |
| H | 14.135432000 | 6.642281000  | 3.636186000  |
| H | 12.493942000 | 6.770421000  | 4.275692000  |
| H | 13.359642000 | 8.233577000  | 3.727961000  |
| C | 14.100975000 | 6.130804000  | 6.377762000  |
| H | 14.784511000 | 5.446386000  | 5.866213000  |
| H | 14.462164000 | 6.272949000  | 7.400138000  |
| H | 13.114213000 | 5.658028000  | 6.405280000  |
| C | 5.757357000  | 8.551322000  | 3.294711000  |
| C | 4.553357000  | 8.494236000  | 4.237564000  |
| H | 4.278169000  | 9.496302000  | 4.583887000  |
| H | 3.690065000  | 8.056653000  | 3.726838000  |
| H | 4.787915000  | 7.873744000  | 5.107836000  |
| C | 6.975353000  | 9.108800000  | 4.033252000  |
| H | 6.755332000  | 10.108989000 | 4.425219000  |
| H | 7.244381000  | 8.444281000  | 4.860337000  |
| H | 7.826880000  | 9.189373000  | 3.352075000  |
| C | 5.438530000  | 9.404437000  | 2.064345000  |
| H | 5.224363000  | 10.439915000 | 2.351161000  |
| H | 6.289141000  | 9.399232000  | 1.377878000  |
| H | 4.563481000  | 9.007260000  | 1.539891000  |
| C | 9.465213000  | 7.533763000  | 0.840897000  |
| C | 10.402258000 | 8.162503000  | 1.873568000  |
| H | 10.059009000 | 9.167630000  | 2.136572000  |
| H | 10.429366000 | 7.551701000  | 2.779762000  |
| H | 11.422657000 | 8.238268000  | 1.483473000  |
| C | 9.409049000  | 8.406312000  | -0.415316000 |
| H | 9.042395000  | 9.406616000  | -0.165320000 |
| H | 10.401923000 | 8.504063000  | -0.866647000 |
| H | 8.732733000  | 7.971147000  | -1.156557000 |
| C | 9.940698000  | 6.122947000  | 0.490037000  |
| H | 9.261967000  | 5.651817000  | -0.226600000 |
| H | 10.941054000 | 6.155064000  | 0.046604000  |
| H | 9.988668000  | 5.507491000  | 1.392482000  |
| C | 5.800500000  | 5.100730000  | 0.361160000  |
| C | 4.385064000  | 5.264003000  | 0.921396000  |
| H | 4.294572000  | 6.214670000  | 1.449160000  |
| H | 3.649296000  | 5.231867000  | 0.110394000  |
| H | 4.151905000  | 4.460881000  | 1.624871000  |
| C | 6.088474000  | 6.208873000  | -0.653792000 |

|   |             |             |              |
|---|-------------|-------------|--------------|
| H | 6.023730000 | 7.196099000 | -0.191807000 |
| H | 7.089298000 | 6.096687000 | -1.079394000 |
| H | 5.362185000 | 6.161066000 | -1.472250000 |
| C | 5.943607000 | 3.737962000 | -0.320808000 |
| H | 5.233758000 | 3.641476000 | -1.148701000 |
| H | 6.954906000 | 3.613592000 | -0.720662000 |
| H | 5.745465000 | 2.927456000 | 0.388135000  |

**Cs<sub>2</sub>-N<sub>2</sub>**

|    |              |              |              |
|----|--------------|--------------|--------------|
| U  | 12.602854000 | 2.077560000  | 31.277788000 |
| U  | 12.010934000 | -0.805843000 | 29.642331000 |
| Cs | 13.233169000 | 5.329276000  | 33.364762000 |
| Cs | 11.306908000 | -4.042188000 | 27.555894000 |
| Si | 12.161739000 | 2.112052000  | 35.086386000 |
| Si | 16.003827000 | 3.844521000  | 31.342331000 |
| Si | 10.631918000 | 5.312874000  | 30.604549000 |
| Si | 11.701385000 | -0.689400000 | 25.816257000 |
| Si | 8.841337000  | -2.905820000 | 30.211181000 |
| Si | 14.373254000 | -3.829185000 | 29.680825000 |
| O  | 11.054804000 | 0.917598000  | 30.418297000 |
| O  | 12.174118000 | 2.273671000  | 33.453888000 |
| O  | 10.712495000 | 1.583914000  | 35.721163000 |
| O  | 13.327496000 | 1.114744000  | 35.730199000 |
| O  | 12.554205000 | 3.643264000  | 35.695689000 |
| O  | 14.519583000 | 3.188404000  | 31.581002000 |
| O  | 17.299520000 | 2.869688000  | 31.719913000 |
| O  | 15.992664000 | 5.235571000  | 32.315174000 |
| O  | 16.300284000 | 4.414475000  | 29.807071000 |
| O  | 11.678286000 | 4.072958000  | 30.842145000 |
| O  | 9.061222000  | 5.039282000  | 31.084766000 |
| O  | 10.537009000 | 5.863020000  | 29.031788000 |
| O  | 11.160238000 | 6.548755000  | 31.637481000 |
| O  | 11.622317000 | -0.826010000 | 27.448775000 |
| O  | 13.188067000 | -0.283196000 | 25.187455000 |
| O  | 10.621326000 | 0.400621000  | 25.161709000 |
| O  | 11.420099000 | -2.248381000 | 25.213588000 |
| O  | 10.321363000 | -2.219645000 | 30.039692000 |
| O  | 7.547768000  | -1.993529000 | 29.695608000 |
| O  | 8.836903000  | -4.234878000 | 29.159396000 |
| O  | 8.468374000  | -3.388819000 | 31.764053000 |
| O  | 13.303862000 | -2.614972000 | 29.412617000 |
| O  | 13.796820000 | -5.099127000 | 28.712017000 |
| O  | 14.376999000 | -4.458651000 | 31.220763000 |
| O  | 15.963875000 | -3.488816000 | 29.322647000 |
| N  | 13.435698000 | 0.089306000  | 31.136435000 |
| N  | 13.597894000 | 0.642680000  | 29.858881000 |
| C  | 9.359501000  | 1.983780000  | 35.452546000 |
| C  | 9.275241000  | 3.464083000  | 35.078706000 |
| H  | 9.686553000  | 4.090353000  | 35.875377000 |
| H  | 8.232512000  | 3.754678000  | 34.915971000 |
| H  | 9.824549000  | 3.662454000  | 34.153776000 |
| C  | 8.581773000  | 1.715192000  | 36.742582000 |
| H  | 8.676363000  | 0.663701000  | 37.029746000 |
| H  | 7.519264000  | 1.943314000  | 36.609666000 |
| H  | 8.966213000  | 2.328865000  | 37.562657000 |
| C  | 8.820557000  | 1.115125000  | 34.319798000 |
| H  | 9.388882000  | 1.281689000  | 33.401344000 |
| H  | 7.767377000  | 1.340141000  | 34.124279000 |
| H  | 8.899915000  | 0.057333000  | 34.587060000 |
| C  | 13.348979000 | -0.310257000 | 35.921648000 |
| C  | 12.665182000 | -0.640605000 | 37.250355000 |
| H  | 13.183610000 | -0.149237000 | 38.080307000 |
| H  | 12.680130000 | -1.720344000 | 37.433737000 |
| H  | 11.626384000 | -0.301672000 | 37.235113000 |

|   |              |              |              |
|---|--------------|--------------|--------------|
| C | 14.826787000 | -0.696311000 | 35.974107000 |
| H | 15.318130000 | -0.444308000 | 35.030974000 |
| H | 14.939103000 | -1.770895000 | 36.150969000 |
| H | 15.332229000 | -0.159598000 | 36.783326000 |
| C | 12.649497000 | -1.016659000 | 34.765036000 |
| H | 11.589320000 | -0.749930000 | 34.740919000 |
| H | 12.723971000 | -2.101392000 | 34.884229000 |
| H | 13.105103000 | -0.743256000 | 33.809179000 |
| C | 12.959542000 | 4.004582000  | 37.032873000 |
| C | 12.674762000 | 5.503486000  | 37.171769000 |
| H | 13.281696000 | 6.091626000  | 36.474354000 |
| H | 12.916566000 | 5.848171000  | 38.182041000 |
| H | 11.618289000 | 5.715315000  | 36.980131000 |
| C | 14.457656000 | 3.733533000  | 37.187759000 |
| H | 14.660235000 | 2.670193000  | 37.048708000 |
| H | 14.806903000 | 4.039866000  | 38.179870000 |
| H | 15.029620000 | 4.291736000  | 36.439094000 |
| C | 12.164977000 | 3.241221000  | 38.092825000 |
| H | 11.094711000 | 3.441067000  | 37.997092000 |
| H | 12.484748000 | 3.552100000  | 39.093125000 |
| H | 12.323026000 | 2.165458000  | 37.999927000 |
| C | 17.544503000 | 1.979330000  | 32.821471000 |
| C | 17.042376000 | 0.588882000  | 32.440592000 |
| H | 15.964805000 | 0.590018000  | 32.254582000 |
| H | 17.260028000 | -0.128282000 | 33.238938000 |
| H | 17.544008000 | 0.245200000  | 31.531221000 |
| C | 16.859527000 | 2.471415000  | 34.096438000 |
| H | 17.180567000 | 3.488426000  | 34.340925000 |
| H | 17.111276000 | 1.819221000  | 34.938616000 |
| H | 15.772043000 | 2.460815000  | 33.982224000 |
| C | 19.063556000 | 1.961365000  | 33.005890000 |
| H | 19.552587000 | 1.647249000  | 32.078849000 |
| H | 19.349153000 | 1.264153000  | 33.800248000 |
| H | 19.435910000 | 2.956179000  | 33.268469000 |
| C | 16.882016000 | 6.367543000  | 32.314893000 |
| C | 18.341006000 | 5.938435000  | 32.160923000 |
| H | 18.631309000 | 5.256950000  | 32.964820000 |
| H | 18.996638000 | 6.814944000  | 32.198226000 |
| H | 18.500231000 | 5.430954000  | 31.208294000 |
| C | 16.695261000 | 7.049873000  | 33.673899000 |
| H | 15.668233000 | 7.412783000  | 33.795310000 |
| H | 17.359750000 | 7.914702000  | 33.766434000 |
| H | 16.919936000 | 6.354704000  | 34.488875000 |
| C | 16.476860000 | 7.320941000  | 31.187910000 |
| H | 16.557254000 | 6.815571000  | 30.223896000 |
| H | 17.115589000 | 8.210886000  | 31.182706000 |
| H | 15.439465000 | 7.647777000  | 31.317488000 |
| C | 16.932295000 | 3.819838000  | 28.659366000 |
| C | 16.346788000 | 4.552868000  | 27.452163000 |
| H | 15.264834000 | 4.403310000  | 27.408499000 |
| H | 16.789888000 | 4.185475000  | 26.520768000 |
| H | 16.541649000 | 5.627535000  | 27.526191000 |
| C | 16.642607000 | 2.324007000  | 28.581975000 |
| H | 17.112282000 | 1.801867000  | 29.418470000 |
| H | 17.041201000 | 1.910720000  | 27.649847000 |
| H | 15.569761000 | 2.119264000  | 28.620409000 |
| C | 18.440938000 | 4.062834000  | 28.745809000 |
| H | 18.658699000 | 5.134944000  | 28.793338000 |
| H | 18.947763000 | 3.652905000  | 27.865438000 |
| H | 18.849242000 | 3.578283000  | 29.636722000 |
| C | 7.946672000  | 4.450424000  | 30.392590000 |
| C | 7.029073000  | 3.901975000  | 31.485034000 |
| H | 7.549301000  | 3.137459000  | 32.067880000 |
| H | 6.128941000  | 3.457169000  | 31.048288000 |

|   |              |              |              |
|---|--------------|--------------|--------------|
| H | 6.722032000  | 4.704467000  | 32.163421000 |
| C | 8.415178000  | 3.333387000  | 29.466599000 |
| H | 9.041025000  | 3.742279000  | 28.668986000 |
| H | 7.555213000  | 2.839244000  | 29.004711000 |
| H | 8.995237000  | 2.582940000  | 30.010405000 |
| C | 7.230394000  | 5.542529000  | 29.594920000 |
| H | 6.873724000  | 6.335631000  | 30.260494000 |
| H | 6.364308000  | 5.128848000  | 29.067072000 |
| H | 7.911439000  | 5.978782000  | 28.859620000 |
| C | 11.557403000 | 6.166258000  | 28.068078000 |
| C | 11.919562000 | 4.881095000  | 27.328899000 |
| H | 12.338210000 | 4.148370000  | 28.023052000 |
| H | 12.655563000 | 5.076828000  | 26.542673000 |
| H | 11.029398000 | 4.446913000  | 26.864754000 |
| C | 10.927885000 | 7.173971000  | 27.104270000 |
| H | 10.020398000 | 6.755540000  | 26.658807000 |
| H | 11.623943000 | 7.428021000  | 26.298357000 |
| H | 10.656733000 | 8.094324000  | 27.630025000 |
| C | 12.797546000 | 6.766485000  | 28.731632000 |
| H | 12.537909000 | 7.662622000  | 29.301807000 |
| H | 13.534679000 | 7.043929000  | 27.971190000 |
| H | 13.269595000 | 6.045347000  | 29.405027000 |
| C | 10.467913000 | 7.743928000  | 32.051099000 |
| C | 11.554497000 | 8.728417000  | 32.494774000 |
| H | 12.113546000 | 8.341591000  | 33.354105000 |
| H | 11.111151000 | 9.682455000  | 32.796879000 |
| H | 12.258828000 | 8.918282000  | 31.679191000 |
| C | 9.663984000  | 8.361611000  | 30.906787000 |
| H | 10.314081000 | 8.609170000  | 30.063918000 |
| H | 9.175951000  | 9.280915000  | 31.247520000 |
| H | 8.893940000  | 7.673133000  | 30.555123000 |
| C | 9.549831000  | 7.400653000  | 33.226439000 |
| H | 8.811384000  | 6.658879000  | 32.916776000 |
| H | 9.032437000  | 8.294842000  | 33.590432000 |
| H | 10.128368000 | 6.983292000  | 34.057932000 |
| C | 13.810759000 | 1.002383000  | 25.017470000 |
| C | 15.313018000 | 0.728128000  | 24.954585000 |
| H | 15.655263000 | 0.275372000  | 25.888711000 |
| H | 15.869382000 | 1.657014000  | 24.793043000 |
| H | 15.541533000 | 0.043060000  | 24.131900000 |
| C | 13.479867000 | 1.912309000  | 26.195262000 |
| H | 12.404778000 | 2.108722000  | 26.235187000 |
| H | 13.996480000 | 2.870650000  | 26.091505000 |
| H | 13.790298000 | 1.453794000  | 27.137998000 |
| C | 13.326173000 | 1.618660000  | 23.703196000 |
| H | 13.582022000 | 0.970529000  | 22.858530000 |
| H | 13.798556000 | 2.592903000  | 23.537155000 |
| H | 12.242057000 | 1.753366000  | 23.726447000 |
| C | 9.216279000  | 0.596332000  | 25.387266000 |
| C | 9.049653000  | 1.626201000  | 26.500875000 |
| H | 9.476527000  | 1.258058000  | 27.437179000 |
| H | 7.991149000  | 1.851591000  | 26.665238000 |
| H | 9.558090000  | 2.556634000  | 26.231560000 |
| C | 8.654998000  | 1.143822000  | 24.073318000 |
| H | 9.182943000  | 2.058734000  | 23.788354000 |
| H | 7.589839000  | 1.375965000  | 24.174103000 |
| H | 8.774373000  | 0.415415000  | 23.265876000 |
| C | 8.518210000  | -0.712131000 | 25.760011000 |
| H | 8.670343000  | -1.468247000 | 24.984758000 |
| H | 7.442152000  | -0.547256000 | 25.874717000 |
| H | 8.897965000  | -1.100163000 | 26.709608000 |
| C | 11.661192000 | -2.753696000 | 23.882963000 |
| C | 13.136544000 | -3.140583000 | 23.757544000 |
| H | 13.767313000 | -2.263037000 | 23.910306000 |

|   |              |              |              |
|---|--------------|--------------|--------------|
| H | 13.343005000 | -3.564785000 | 22.768924000 |
| H | 13.403623000 | -3.889911000 | 24.510335000 |
| C | 10.774253000 | -3.993891000 | 23.734803000 |
| H | 11.061572000 | -4.775953000 | 24.446582000 |
| H | 10.870411000 | -4.417944000 | 22.730372000 |
| H | 9.722923000  | -3.739083000 | 23.900666000 |
| C | 11.281326000 | -1.730709000 | 22.812367000 |
| H | 10.224585000 | -1.462244000 | 22.888858000 |
| H | 11.458759000 | -2.149726000 | 21.816236000 |
| H | 11.874734000 | -0.820551000 | 22.914617000 |
| C | 6.759703000  | -0.995215000 | 30.366637000 |
| C | 7.621388000  | -0.175497000 | 31.320827000 |
| H | 7.994984000  | -0.806543000 | 32.131711000 |
| H | 7.030003000  | 0.631309000  | 31.764148000 |
| H | 8.477173000  | 0.266620000  | 30.803423000 |
| C | 6.188813000  | -0.111181000 | 29.258354000 |
| H | 6.998808000  | 0.372602000  | 28.706413000 |
| H | 5.538723000  | 0.663737000  | 29.677516000 |
| H | 5.601193000  | -0.710973000 | 28.556079000 |
| C | 5.628476000  | -1.690464000 | 31.127972000 |
| H | 4.995816000  | -2.261445000 | 30.440300000 |
| H | 4.996793000  | -0.954262000 | 31.636699000 |
| H | 6.040494000  | -2.372424000 | 31.876283000 |
| C | 7.723046000  | -5.024603000 | 28.696384000 |
| C | 7.078318000  | -4.314740000 | 27.503774000 |
| H | 6.701165000  | -3.338171000 | 27.812548000 |
| H | 6.252283000  | -4.908546000 | 27.097852000 |
| H | 7.811550000  | -4.162251000 | 26.704233000 |
| C | 6.692562000  | -5.258506000 | 29.800962000 |
| H | 7.144717000  | -5.771902000 | 30.653134000 |
| H | 5.872628000  | -5.877069000 | 29.420875000 |
| H | 6.276293000  | -4.312593000 | 30.151151000 |
| C | 8.311129000  | -6.370311000 | 28.260002000 |
| H | 9.010410000  | -6.248034000 | 27.425268000 |
| H | 7.518921000  | -7.046664000 | 27.923927000 |
| H | 8.841583000  | -6.846588000 | 29.090185000 |
| C | 9.240069000  | -4.095393000 | 32.748000000 |
| C | 10.020884000 | -3.072558000 | 33.568695000 |
| H | 10.720435000 | -2.527360000 | 32.930740000 |
| H | 10.586586000 | -3.561692000 | 34.368028000 |
| H | 9.336264000  | -2.351615000 | 34.025031000 |
| C | 8.222523000  | -4.818982000 | 33.632635000 |
| H | 7.515376000  | -4.102713000 | 34.061511000 |
| H | 8.723874000  | -5.343160000 | 34.452724000 |
| H | 7.655026000  | -5.551812000 | 33.051296000 |
| C | 10.192630000 | -5.100960000 | 32.100118000 |
| H | 9.640976000  | -5.814286000 | 31.481204000 |
| H | 10.733293000 | -5.660063000 | 32.870637000 |
| H | 10.933502000 | -4.592275000 | 31.476356000 |
| C | 14.157186000 | -6.493265000 | 28.715928000 |
| C | 13.698756000 | -7.049850000 | 27.363788000 |
| H | 12.609345000 | -6.989884000 | 27.259244000 |
| H | 13.977126000 | -8.103714000 | 27.264951000 |
| H | 14.161670000 | -6.493881000 | 26.542230000 |
| C | 13.417140000 | -7.200761000 | 29.853670000 |
| H | 13.723175000 | -6.786038000 | 30.815697000 |
| H | 13.625371000 | -8.276186000 | 29.841750000 |
| H | 12.335788000 | -7.061243000 | 29.750328000 |
| C | 15.667525000 | -6.684260000 | 28.853835000 |
| H | 16.197065000 | -6.198506000 | 28.030030000 |
| H | 15.913839000 | -7.751399000 | 28.839494000 |
| H | 16.031428000 | -6.259480000 | 29.790723000 |
| C | 15.174883000 | -4.169243000 | 32.382057000 |
| C | 14.327619000 | -4.614051000 | 33.574569000 |

|   |              |              |              |
|---|--------------|--------------|--------------|
| H | 13.393009000 | -4.047919000 | 33.605170000 |
| H | 14.865329000 | -4.454863000 | 34.514918000 |
| H | 14.082217000 | -5.677826000 | 33.493597000 |
| C | 16.464461000 | -4.990628000 | 32.313146000 |
| H | 16.238606000 | -6.060754000 | 32.258553000 |
| H | 17.078036000 | -4.818378000 | 33.204016000 |
| H | 17.045791000 | -4.706338000 | 31.432073000 |
| C | 15.497102000 | -2.680898000 | 32.469202000 |
| H | 16.141824000 | -2.380750000 | 31.640091000 |
| H | 16.018358000 | -2.461595000 | 33.406437000 |
| H | 14.590474000 | -2.072145000 | 32.425799000 |
| C | 16.564325000 | -2.772222000 | 28.230284000 |
| C | 17.954631000 | -3.385428000 | 28.048861000 |
| H | 18.520544000 | -3.320866000 | 28.982995000 |
| H | 18.512145000 | -2.855451000 | 27.269761000 |
| H | 17.882087000 | -4.439620000 | 27.764675000 |
| C | 16.681348000 | -1.302100000 | 28.624356000 |
| H | 15.699030000 | -0.861282000 | 28.815595000 |
| H | 17.174179000 | -0.730050000 | 27.831286000 |
| H | 17.281335000 | -1.204365000 | 29.534005000 |
| C | 15.745753000 | -2.926263000 | 26.948260000 |
| H | 15.609052000 | -3.983793000 | 26.703002000 |
| H | 16.257328000 | -2.442878000 | 26.110125000 |
| H | 14.763956000 | -2.456295000 | 27.053171000 |

#### Cs<sub>4</sub>-(N)<sub>2</sub>

|    |              |              |              |
|----|--------------|--------------|--------------|
| U  | 9.455055000  | 5.771052000  | 5.511042000  |
| U  | 10.264963000 | 2.604713000  | 6.120316000  |
| Cs | 10.400037000 | 5.219423000  | 9.392470000  |
| Cs | 6.363669000  | 4.819796000  | 7.833637000  |
| Cs | 8.399854000  | 8.816010000  | 8.217617000  |
| Cs | 8.270253000  | 2.825370000  | 2.888641000  |
| Si | 11.672458000 | 0.819059000  | 2.958034000  |
| Si | 12.112067000 | 1.648657000  | 9.373598000  |
| Si | 6.968232000  | 0.724352000  | 6.146692000  |
| Si | 6.477304000  | 7.229953000  | 10.813440000 |
| Si | 11.959307000 | 8.263551000  | 7.213046000  |
| Si | 7.406196000  | 6.524914000  | 2.378743000  |
| O  | 11.079021000 | 1.552121000  | 4.283987000  |
| O  | 10.471295000 | 0.980823000  | 1.767147000  |
| O  | 13.139191000 | 1.408455000  | 2.406369000  |
| O  | 11.925221000 | -0.828842000 | 3.087349000  |
| O  | 8.062956000  | 6.782318000  | 6.194263000  |
| O  | 11.473458000 | 2.311690000  | 8.031950000  |
| O  | 13.768606000 | 1.392145000  | 9.308528000  |
| O  | 11.490555000 | 0.172623000  | 9.856208000  |
| O  | 11.722058000 | 2.711226000  | 10.636613000 |
| O  | 8.498147000  | 1.216936000  | 5.946305000  |
| O  | 6.771807000  | -0.940627000 | 6.146580000  |
| O  | 6.190843000  | 1.235480000  | 7.553548000  |
| O  | 6.089128000  | 1.430691000  | 4.884084000  |
| O  | 7.741961000  | 6.602281000  | 10.069415000 |
| O  | 6.201721000  | 6.821720000  | 12.431833000 |
| O  | 5.102730000  | 6.808094000  | 9.898475000  |
| O  | 6.447703000  | 8.937489000  | 10.778548000 |
| O  | 10.858950000 | 7.180331000  | 6.746123000  |
| O  | 12.301379000 | 7.851262000  | 8.819630000  |
| O  | 11.325228000 | 9.833516000  | 7.312071000  |
| O  | 13.330463000 | 8.430724000  | 6.278801000  |
| O  | 8.419955000  | 5.816062000  | 3.425125000  |
| O  | 6.121552000  | 7.388626000  | 3.012228000  |
| O  | 8.144505000  | 7.598015000  | 1.315673000  |
| O  | 6.682433000  | 5.241894000  | 1.538428000  |
| N  | 9.039775000  | 4.134958000  | 6.771387000  |

|   |              |              |              |
|---|--------------|--------------|--------------|
| N | 10.722280000 | 4.576919000  | 4.930463000  |
| C | 10.366980000 | 0.325632000  | 0.489059000  |
| C | 9.399227000  | 1.173727000  | -0.342001000 |
| H | 9.279380000  | 0.752494000  | -1.345266000 |
| H | 8.406472000  | 1.202237000  | 0.121003000  |
| H | 9.771897000  | 2.198272000  | -0.443832000 |
| C | 11.716181000 | 0.254073000  | -0.227203000 |
| H | 11.596800000 | -0.232169000 | -1.201427000 |
| H | 12.123275000 | 1.255318000  | -0.391032000 |
| H | 12.439816000 | -0.317449000 | 0.356324000  |
| C | 9.790675000  | -1.077922000 | 0.687314000  |
| H | 9.666956000  | -1.585712000 | -0.275592000 |
| H | 10.454211000 | -1.667999000 | 1.322279000  |
| H | 8.811607000  | -1.020510000 | 1.172725000  |
| C | 14.332515000 | 3.157434000  | 3.549619000  |
| H | 14.806168000 | 4.138508000  | 3.438174000  |
| H | 13.601409000 | 3.220864000  | 4.358911000  |
| H | 15.105990000 | 2.432987000  | 3.823330000  |
| C | 13.648726000 | 2.739394000  | 2.247580000  |
| C | 12.536343000 | 3.725056000  | 1.890792000  |
| H | 12.960541000 | 4.709655000  | 1.667003000  |
| H | 11.990787000 | 3.379897000  | 1.007226000  |
| H | 11.841892000 | 3.847711000  | 2.728756000  |
| C | 14.677858000 | 2.656012000  | 1.117024000  |
| H | 15.160277000 | 3.626169000  | 0.958565000  |
| H | 15.451592000 | 1.921054000  | 1.359921000  |
| H | 14.200417000 | 2.350962000  | 0.181177000  |
| C | 13.073192000 | -1.580961000 | 3.508166000  |
| C | 13.825299000 | -0.862365000 | 4.627700000  |
| H | 14.641562000 | -1.488421000 | 5.004115000  |
| H | 14.248683000 | 0.075914000  | 4.262333000  |
| H | 13.148789000 | -0.641566000 | 5.456529000  |
| C | 13.991873000 | -1.800295000 | 2.303685000  |
| H | 14.864461000 | -2.400388000 | 2.584308000  |
| H | 13.458020000 | -2.328860000 | 1.507104000  |
| H | 14.338011000 | -0.838228000 | 1.917704000  |
| C | 12.528177000 | -2.919175000 | 4.010393000  |
| H | 13.344243000 | -3.583603000 | 4.313572000  |
| H | 11.868952000 | -2.762987000 | 4.868764000  |
| H | 11.954035000 | -3.415501000 | 3.221707000  |
| C | 14.838227000 | 2.200860000  | 8.807355000  |
| C | 14.665646000 | 3.660148000  | 9.232494000  |
| H | 15.520186000 | 4.258286000  | 8.899566000  |
| H | 13.762215000 | 4.085991000  | 8.786684000  |
| H | 14.590043000 | 3.739142000  | 10.320677000 |
| C | 14.885697000 | 2.088052000  | 7.283706000  |
| H | 15.720783000 | 2.666822000  | 6.874933000  |
| H | 15.014030000 | 1.043832000  | 6.984061000  |
| H | 13.956664000 | 2.458942000  | 6.844215000  |
| C | 16.114817000 | 1.622398000  | 9.422423000  |
| H | 16.998256000 | 2.167400000  | 9.074063000  |
| H | 16.076473000 | 1.683384000  | 10.514279000 |
| H | 16.225705000 | 0.570424000  | 9.142974000  |
| C | 11.876303000 | -1.171325000 | 9.521510000  |
| C | 12.216672000 | -1.278376000 | 8.037082000  |
| H | 12.454910000 | -2.312627000 | 7.767854000  |
| H | 11.371431000 | -0.950706000 | 7.424943000  |
| H | 13.084382000 | -0.656275000 | 7.803374000  |
| C | 13.077155000 | -1.587827000 | 10.374953000 |
| H | 12.821109000 | -1.553723000 | 11.438986000 |
| H | 13.380660000 | -2.612562000 | 10.134753000 |
| H | 13.920803000 | -0.918453000 | 10.193375000 |
| C | 10.670159000 | -2.048082000 | 9.857877000  |
| H | 10.402774000 | -1.938063000 | 10.913510000 |



|   |              |              |              |
|---|--------------|--------------|--------------|
| H | 9.806792000  | -1.761098000 | 9.253387000  |
| H | 10.894541000 | -3.102802000 | 9.667714000  |
| C | 11.768787000 | 2.482524000  | 12.057665000 |
| C | 11.816721000 | 3.868197000  | 12.707389000 |
| H | 11.872560000 | 3.782232000  | 13.797305000 |
| H | 12.694186000 | 4.424137000  | 12.361963000 |
| H | 10.917270000 | 4.446254000  | 12.470244000 |
| C | 10.496197000 | 1.744700000  | 12.480958000 |
| H | 10.478591000 | 1.587576000  | 13.565125000 |
| H | 9.611061000  | 2.327064000  | 12.204618000 |
| H | 10.443022000 | 0.777605000  | 11.977306000 |
| C | 13.011986000 | 1.691427000  | 12.466207000 |
| H | 13.032878000 | 1.561019000  | 13.553474000 |
| H | 13.015908000 | 0.704947000  | 12.000717000 |
| H | 13.923108000 | 2.215488000  | 12.165292000 |
| C | 7.434640000  | -1.944150000 | 5.360495000  |
| C | 7.606596000  | -1.484841000 | 3.912588000  |
| H | 8.069877000  | -2.276957000 | 3.316376000  |
| H | 6.638239000  | -1.238435000 | 3.465923000  |
| H | 8.257910000  | -0.607506000 | 3.865679000  |
| C | 8.797065000  | -2.244871000 | 5.984013000  |
| H | 9.316937000  | -3.027617000 | 5.422378000  |
| H | 9.415259000  | -1.344085000 | 5.980112000  |
| H | 8.676577000  | -2.587691000 | 7.016359000  |
| C | 6.534979000  | -3.179841000 | 5.423617000  |
| H | 6.982977000  | -4.014047000 | 4.874017000  |
| H | 6.387865000  | -3.490833000 | 6.462338000  |
| H | 5.553664000  | -2.966595000 | 4.988860000  |
| C | 6.143504000  | 0.584465000  | 8.839181000  |
| C | 5.760267000  | 1.669052000  | 9.845304000  |
| H | 5.614375000  | 1.239710000  | 10.841302000 |
| H | 6.550498000  | 2.421821000  | 9.921978000  |
| H | 4.825639000  | 2.156251000  | 9.546637000  |
| C | 7.504275000  | -0.004166000 | 9.203821000  |
| H | 7.480031000  | -0.433001000 | 10.210929000 |
| H | 7.772668000  | -0.796243000 | 8.501189000  |
| H | 8.283166000  | 0.762701000  | 9.176613000  |
| C | 5.067602000  | -0.503825000 | 8.820153000  |
| H | 5.003319000  | -0.998128000 | 9.795606000  |
| H | 4.087753000  | -0.068759000 | 8.595717000  |
| H | 5.303564000  | -1.252397000 | 8.061212000  |
| C | 4.671201000  | 1.439698000  | 4.648812000  |
| C | 4.064641000  | 2.637567000  | 5.385386000  |
| H | 4.208842000  | 2.512679000  | 6.462023000  |
| H | 4.548127000  | 3.564626000  | 5.058786000  |
| H | 2.991593000  | 2.723354000  | 5.182688000  |
| C | 3.991584000  | 0.145901000  | 5.098204000  |
| H | 4.416668000  | -0.718856000 | 4.583393000  |
| H | 4.108990000  | -0.007949000 | 6.172254000  |
| H | 2.921086000  | 0.191693000  | 4.870937000  |
| C | 4.501088000  | 1.607157000  | 3.138170000  |
| H | 4.961587000  | 0.767823000  | 2.606891000  |
| H | 3.442221000  | 1.646731000  | 2.863324000  |
| H | 4.969682000  | 2.536616000  | 2.801624000  |
| C | 6.688424000  | 5.684390000  | 13.155671000 |
| C | 8.140490000  | 5.937329000  | 13.569692000 |
| H | 8.545570000  | 5.086610000  | 14.127987000 |
| H | 8.752004000  | 6.098666000  | 12.676982000 |
| H | 8.209600000  | 6.825409000  | 14.205904000 |
| C | 6.601879000  | 4.414669000  | 12.306119000 |
| H | 6.987313000  | 3.550368000  | 12.857248000 |
| H | 5.565545000  | 4.205040000  | 12.025868000 |
| H | 7.191484000  | 4.550320000  | 11.394225000 |
| C | 5.798970000  | 5.560597000  | 14.393877000 |

|   |              |              |              |
|---|--------------|--------------|--------------|
| H | 6.119352000  | 4.724015000  | 15.023730000 |
| H | 5.843391000  | 6.477853000  | 14.988987000 |
| H | 4.757478000  | 5.393897000  | 14.102293000 |
| C | 3.697162000  | 6.970394000  | 10.120626000 |
| C | 3.383887000  | 8.152004000  | 11.036972000 |
| H | 3.822369000  | 7.995996000  | 12.025618000 |
| H | 3.789982000  | 9.076713000  | 10.620835000 |
| H | 2.300250000  | 8.262537000  | 11.152864000 |
| C | 3.071861000  | 7.204847000  | 8.741878000  |
| H | 1.985025000  | 7.316164000  | 8.815293000  |
| H | 3.482108000  | 8.111764000  | 8.287320000  |
| H | 3.278424000  | 6.361835000  | 8.073248000  |
| C | 3.149597000  | 5.677458000  | 10.733192000 |
| H | 3.591113000  | 5.510026000  | 11.719026000 |
| H | 2.061121000  | 5.725794000  | 10.846541000 |
| H | 3.387009000  | 4.817742000  | 10.097216000 |
| C | 6.860804000  | 9.915100000  | 11.741789000 |
| C | 5.889379000  | 9.955285000  | 12.924989000 |
| H | 5.847256000  | 8.977769000  | 13.408788000 |
| H | 6.210846000  | 10.703052000 | 13.658179000 |
| H | 4.883727000  | 10.220909000 | 12.587500000 |
| C | 6.826341000  | 11.262853000 | 11.012898000 |
| H | 7.063654000  | 12.082751000 | 11.698400000 |
| H | 7.556034000  | 11.292926000 | 10.195765000 |
| H | 5.831920000  | 11.439898000 | 10.592211000 |
| C | 8.279199000  | 9.625417000  | 12.239093000 |
| H | 8.316705000  | 8.656496000  | 12.741374000 |
| H | 8.991328000  | 9.609664000  | 11.407871000 |
| H | 8.608513000  | 10.393883000 | 12.946685000 |
| C | 13.443980000 | 7.488572000  | 10.864185000 |
| H | 14.043330000 | 7.931454000  | 11.666334000 |
| H | 12.546821000 | 7.056017000  | 11.319570000 |
| H | 14.024164000 | 6.683058000  | 10.404051000 |
| C | 13.069227000 | 8.543277000  | 9.820357000  |
| C | 14.341206000 | 9.159224000  | 9.236968000  |
| H | 14.918036000 | 9.647802000  | 10.029287000 |
| H | 14.968894000 | 8.389293000  | 8.780921000  |
| H | 14.107168000 | 9.903515000  | 8.473330000  |
| C | 12.195368000 | 9.624349000  | 10.461170000 |
| H | 12.741601000 | 10.152223000 | 11.250225000 |
| H | 11.876296000 | 10.347255000 | 9.706918000  |
| H | 11.306717000 | 9.171402000  | 10.913289000 |
| C | 11.399244000 | 10.930342000 | 6.381924000  |
| C | 12.784061000 | 11.576413000 | 6.458109000  |
| H | 12.849957000 | 12.430145000 | 5.775062000  |
| H | 12.980886000 | 11.937955000 | 7.472774000  |
| H | 13.552048000 | 10.849176000 | 6.187515000  |
| C | 11.098317000 | 10.457774000 | 4.959374000  |
| H | 11.085122000 | 11.305734000 | 4.266247000  |
| H | 11.859955000 | 9.750774000  | 4.623799000  |
| H | 10.121730000 | 9.966158000  | 4.913990000  |
| C | 10.338504000 | 11.937763000 | 6.835438000  |
| H | 10.389437000 | 12.849855000 | 6.232708000  |
| H | 9.329276000  | 11.526411000 | 6.723520000  |
| H | 10.493198000 | 12.211021000 | 7.884236000  |
| C | 14.139737000 | 7.454452000  | 5.596897000  |
| C | 15.527737000 | 8.086050000  | 5.474822000  |
| H | 16.211954000 | 7.415788000  | 4.944700000  |
| H | 15.471420000 | 9.028566000  | 4.921298000  |
| H | 15.945334000 | 8.295428000  | 6.464065000  |
| C | 13.546387000 | 7.204602000  | 4.210805000  |
| H | 14.205146000 | 6.556541000  | 3.623934000  |
| H | 12.575567000 | 6.707230000  | 4.287841000  |
| H | 13.430623000 | 8.149069000  | 3.669844000  |

|   |              |              |              |
|---|--------------|--------------|--------------|
| C | 14.206316000 | 6.153101000  | 6.391926000  |
| H | 14.866068000 | 5.434840000  | 5.895809000  |
| H | 14.591908000 | 6.335835000  | 7.398989000  |
| H | 13.212536000 | 5.701136000  | 6.463432000  |
| C | 5.983722000  | 8.755608000  | 3.414655000  |
| C | 4.910534000  | 8.757260000  | 4.505967000  |
| H | 4.702829000  | 9.775985000  | 4.851490000  |
| H | 3.978961000  | 8.326379000  | 4.126073000  |
| H | 5.246517000  | 8.156649000  | 5.356492000  |
| C | 7.295743000  | 9.310300000  | 3.971940000  |
| H | 7.150140000  | 10.333449000 | 4.338294000  |
| H | 7.643370000  | 8.675577000  | 4.792961000  |
| H | 8.060280000  | 9.331394000  | 3.191163000  |
| C | 5.526644000  | 9.577645000  | 2.207062000  |
| H | 5.367341000  | 10.625661000 | 2.484181000  |
| H | 6.284277000  | 9.535998000  | 1.419950000  |
| H | 4.585811000  | 9.183297000  | 1.809670000  |
| C | 9.414745000  | 7.520220000  | 0.655819000  |
| C | 10.500504000 | 8.034014000  | 1.603274000  |
| H | 10.270042000 | 9.053207000  | 1.928448000  |
| H | 10.569254000 | 7.390412000  | 2.483816000  |
| H | 11.478055000 | 8.044693000  | 1.109446000  |
| C | 9.304548000  | 8.435827000  | -0.565390000 |
| H | 9.048792000  | 9.453014000  | -0.253173000 |
| H | 10.250992000 | 8.470138000  | -1.114991000 |
| H | 8.522566000  | 8.081451000  | -1.243406000 |
| C | 9.729551000  | 6.087140000  | 0.222316000  |
| H | 8.943815000  | 5.697178000  | -0.431121000 |
| H | 10.680340000 | 6.050188000  | -0.319568000 |
| H | 9.813971000  | 5.441166000  | 1.100702000  |
| C | 5.591296000  | 5.271111000  | 0.599916000  |
| C | 4.267031000  | 5.350136000  | 1.364163000  |
| H | 4.235212000  | 6.264507000  | 1.959474000  |
| H | 3.418760000  | 5.341540000  | 0.670929000  |
| H | 4.162418000  | 4.497685000  | 2.041381000  |
| C | 5.707111000  | 6.445800000  | -0.373125000 |
| H | 5.666099000  | 7.400324000  | 0.155156000  |
| H | 6.649120000  | 6.402868000  | -0.925977000 |
| H | 4.883382000  | 6.414801000  | -1.094355000 |
| C | 5.678980000  | 3.955352000  | -0.178333000 |
| H | 4.874573000  | 3.885536000  | -0.917692000 |
| H | 6.636145000  | 3.884567000  | -0.704953000 |
| H | 5.587709000  | 3.097966000  | 0.496530000  |

## References

- 1 a) D. C. Roe, *J. Magn. Reson.* 1985, **63**, 388; b) A. Cu-sanelli; U. Frey; D. T. Richens; A. E. Merbach, *J. Am. Chem. Soc.* 1996, **118**, 5265
- 2 G. A. Bain, J. F. Berry, *J. Chem. Educ.* 2008, **85**, 532-536.
- 3 M. Falcone, L. Barluzzi, J. Andrez, F. Fadaei Tirani, I. Živković, A. Fabrizio, C. Corminboeuf, K. Severin, M. Mazzanti, *Nat. Chem.* 2019, **11**, 154–160
- 4 M. S. Dresselhaus, G. Dresselhaus, *Adv. Phys.* 1981, **30**, 139
- 5 N. Jori; L. Barluzzi, I. Douair, L. Maron, F. Fadaei-Tirani, I. Živković, M. Mazzanti, *J. Am. Chem. Soc.* 2021, **143**, 29, 11225–11234
- 6 CrysAlisPro (Rigaku, V1.171.41.118a, 2021)
- 7 Sheldrick, G.M., *Acta Cryst.*, (2015), **A71**, 3-8.
- 8 O. V. Dolomanov, L. J. Bourhis, R. J. Gildea, J.A.K. Howard, H. Puschmann, *J. Appl. Cryst.*, (2009), **42**, 339-341.
- 9 Sheldrick, G.M., *Acta Cryst.*, (2015), **C71**, 3-8.
- 10 (a) A.C. Schmidt, F. W. Heinemann, W. W. Jr Lukens, K. Meyer, *J. Am. Chem. Soc.*, 2014, **136**, 11980–11993. (b) J. G. Reynolds, A. Zalkin, D. H. Templeton, N. Edelstein, *Inorg. Chem.* 1977, **16**, 1090–1096.
- 11 (a) A. D. Becke, *J. Chem. Phys.* 1993, **98**, 5648; (b) K. Burke, J. P. Perdew, W. Yang, in *Electronic Density Functional Theory: Recent Progress and New Directions*, Eds: J. F. Dobson, G. Vignale, M. P. Das, Plenum, New York, 1998
- 12 (a) A. Moritz, X. Cao, M. Dolg, *Theor. Chem. Acc.* 2007, **118**, 845; (b) A. Hollwarth, M. Bohme, S. Dapprich, A.W. Ehlers, A. Gobbi, V. Jonas, K.F. Kohler, R. Stegmann, A. Veldkamp, G. Frenking, *J. Chem. Phys.* 1993, **208**, 237.
- 13 (a) P. C. Hariharan, J. A. Pople, *Theor. Chim. Acta* 1973, **28**, 213; (b) W. J. Hehre, R. Ditchfield and J. A., *J. Chem. Phys.* 1972, **56**, 2257.
- 14 Gaussian 16, Revision B.01, M. J. Frisch, G. W. Trucks, H. B. Schlegel, G. E. Scuseria, M. A. Robb, J. R. Cheeseman, G. Scalmani, V. Barone, G. A. Petersson, H. Nakatsuji, X. Li, M. Caricato, A. V. Marenich, J. Bloino, B. G. Janesko, R. Gomperts, B. Mennucci, H. P. Hratchian, J. V. Ortiz, A. F. Izmaylov, J. L. Sonnenberg, D. Williams-Young, F. Ding, F. Lipparini, F. Egidi, J. Goings, B. Peng, A. Petrone, T. Henderson, D. Ranasinghe, V. G. Zakrzewski, J. Gao, N. Rega, G. Zheng, W. Liang, M. Hada, M. Ehara, K. Toyota, R. Fukuda, J. Hasegawa, M. Ishida, T. Nakajima, Y. Honda, O. Kitao, H. Nakai, T. Vreven, K. Throssell, J. A. Montgomery, Jr., J. E. Peralta, F. Ogliaro, M. J. Bearpark, J. J. Heyd, E. N. Brothers, K. N. Kudin, V. N. Staroverov, T. A. Keith, R. Kobayashi, J. Normand, K. Raghavachari, A. P. Rendell, J. C. Burant, S. S. Iyengar, J. Tomasi, M. Cossi, J. M. Millam, M. Klene, C. Adamo, R. Cammi, J. W. Ochterski, R. L. Martin, K. Morokuma, O. Farkas, J. B. Foresman, and D. J. Fox, Gaussian, Inc., Wallingford CT, 2016.
